# Supplementary material
Source: publisher figshare collection journal article supplement (https://acs.figshare.com/ndownloader/files/7559887)
Supplement: Supplementary file 1 [file 7559887]

 
data_complex3
 
_audit_creation_method            'SHELXL-2014/7'
_shelx_SHELXL_version_number      '2014/7'
_chemical_name_systematic         ?
_chemical_name_common             ?
_chemical_melting_point           ?
_chemical_formula_moiety         'C74.85 H134.55 Co2 Gd5 N2 O35.95 P2, C H4 O'
_chemical_formula_sum
 'C75.85 H138.55 Co2 Gd5 N2 O36.95 P2' 
_chemical_formula_weight          2635.92

loop_
 _atom_type_symbol
 _atom_type_description
 _atom_type_scat_dispersion_real
 _atom_type_scat_dispersion_imag
 _atom_type_scat_source
 'C'  'C'   0.0033   0.0016
 'International Tables Vol C Tables 4.2.6.8 and 6.1.1.4'
 'H'  'H'   0.0000   0.0000
 'International Tables Vol C Tables 4.2.6.8 and 6.1.1.4'
 'Co'  'Co'   0.3494   0.9721
 'International Tables Vol C Tables 4.2.6.8 and 6.1.1.4'
 'Gd'  'Gd'  -0.1653   3.9035
 'International Tables Vol C Tables 4.2.6.8 and 6.1.1.4'
 'N'  'N'   0.0061   0.0033
 'International Tables Vol C Tables 4.2.6.8 and 6.1.1.4'
 'O'  'O'   0.0106   0.0060
 'International Tables Vol C Tables 4.2.6.8 and 6.1.1.4'
 'P'  'P'   0.1023   0.0942
 'International Tables Vol C Tables 4.2.6.8 and 6.1.1.4'
 
_space_group_crystal_system       monoclinic
_space_group_IT_number            14
_space_group_name_H-M_alt         'P 21/n'
_space_group_name_Hall            '-P 2yn'
 
_shelx_space_group_comment
;
The symmetry employed for this shelxl refinement is uniquely defined
by the following loop, which should always be used as a source of
symmetry information in preference to the above space-group names.
They are only intended as comments.
;
 
loop_
 _space_group_symop_operation_xyz
 'x, y, z'
 '-x+1/2, y+1/2, -z+1/2'
 '-x, -y, -z'
 'x-1/2, -y-1/2, z-1/2'
 
_cell_length_a                    12.826(3)
_cell_length_b                    30.399(7)
_cell_length_c                    28.885(8)
_cell_angle_alpha                 90
_cell_angle_beta                  93.113(16)
_cell_angle_gamma                 90
_cell_volume                      11246(5)
_cell_formula_units_Z             4
_cell_measurement_temperature     100(2)
_cell_measurement_reflns_used     26919
_cell_measurement_theta_min       0.973
_cell_measurement_theta_max       27.915
 
_exptl_crystal_description        block
_exptl_crystal_colour             purple
_exptl_crystal_density_meas       ?
_exptl_crystal_density_method    'not measured'
_exptl_crystal_density_diffrn     1.557          
_exptl_crystal_F_000              5229
_exptl_transmission_factor_min    0.358
_exptl_transmission_factor_max    0.535
_exptl_crystal_size_max           0.39
_exptl_crystal_size_mid           0.27
_exptl_crystal_size_min           0.19
_exptl_absorpt_coefficient_mu     3.291
_shelx_estimated_absorpt_T_min    0.358
_shelx_estimated_absorpt_T_max    0.535
_exptl_absorpt_correction_type   'multi-scan'
_exptl_absorpt_correction_T_min   0.358
_exptl_absorpt_correction_T_max   0.535
_exptl_absorpt_process_details   'multi-scan'
_exptl_absorpt_special_details    ?
_diffrn_ambient_temperature       100(2)
_diffrn_radiation_wavelength      0.71073
_diffrn_radiation_type            MoK\a
_diffrn_source                   'fine-focus sealed tube'
_diffrn_measurement_device_type  'Bruker Apex-II CCD'
_diffrn_measurement_method       '\f and \w scans'
_diffrn_detector_area_resol_mean  ?
_diffrn_reflns_number             26919
_diffrn_reflns_av_unetI/netI      0.0861
_diffrn_reflns_av_R_equivalents   0.1016
_diffrn_reflns_limit_h_min        -16
_diffrn_reflns_limit_h_max        16
_diffrn_reflns_limit_k_min        -40
_diffrn_reflns_limit_k_max        40
_diffrn_reflns_limit_l_min        -38
_diffrn_reflns_limit_l_max        38
_diffrn_reflns_theta_min          0.973
_diffrn_reflns_theta_max          27.915
_diffrn_reflns_theta_full         25.242
_diffrn_measured_fraction_theta_max   0.957
_diffrn_measured_fraction_theta_full  0.987
_diffrn_reflns_Laue_measured_fraction_max    0.957
_diffrn_reflns_Laue_measured_fraction_full   0.987
_diffrn_reflns_point_group_measured_fraction_max   0.957
_diffrn_reflns_point_group_measured_fraction_full  0.987
_reflns_number_total              26919
_reflns_number_gt                 17484
_reflns_threshold_expression      'I > 2\s(I)'
_reflns_Friedel_coverage          0.000
_reflns_Friedel_fraction_max      .
_reflns_Friedel_fraction_full     .
 
_reflns_special_details
;
 Reflections were merged by SHELXL according to the crystal
 class for the calculation of statistics and refinement.
 
 _reflns_Friedel_fraction is defined as the number of unique
 Friedel pairs measured divided by the number that would be
 possible theoretically, ignoring centric projections and
 systematic absences.
;
 
_computing_data_collection       'Bruker Apex2'
_computing_cell_refinement       'Bruker SAINT'
_computing_data_reduction        'Bruker SAINT'
_computing_structure_solution     ?
_computing_structure_refinement 'SHELXL-2014/7 (Sheldrick, 2014)'
_computing_molecular_graphics    'Bruker SHELXTL'
_computing_publication_material  'Bruker SHELXTL'
_refine_special_details           ?
_refine_ls_structure_factor_coef  Fsqd
_refine_ls_matrix_type            full
_refine_ls_weighting_scheme       calc
_refine_ls_weighting_details
'w=1/[\s^2^(Fo^2^)+(0.1000P)^2^+0.4764P] where P=(Fo^2^+2Fc^2^)/3'
_atom_sites_solution_primary      ?
_atom_sites_solution_secondary    ?
_atom_sites_solution_hydrogens    geom
_refine_ls_hydrogen_treatment     constr
_refine_ls_extinction_method      none
_refine_ls_extinction_coef        .
_refine_ls_number_reflns          26919
_refine_ls_number_parameters      1135
_refine_ls_number_restraints      0
_refine_ls_R_factor_all           0.1047
_refine_ls_R_factor_gt            0.0616
_refine_ls_wR_factor_ref          0.1988
_refine_ls_wR_factor_gt           0.1732
_refine_ls_goodness_of_fit_ref    1.163
_refine_ls_restrained_S_all       1.163
_refine_ls_shift/su_max           0.002
_refine_ls_shift/su_mean          0.000

loop_
  _platon_squeeze_void_nr
  _platon_squeeze_void_average_x
  _platon_squeeze_void_average_y
  _platon_squeeze_void_average_z
  _platon_squeeze_void_volume
  _platon_squeeze_void_count_electrons
  _platon_squeeze_void_content
   1  0.620  0.191  0.008        36         4 ' '
   2  0.000  0.500  0.000       852       302 ' '
   3  0.381  0.810 -0.008        35         4 ' '
   4  0.484  0.138  0.155        77        11 ' '
   5  0.534  0.848  0.176        15        -2 ' '
   6  0.500  0.000  0.500       852       302 ' '
   7  0.016  0.638  0.345        77        12 ' '
   8  0.966  0.348  0.324        16        -2 ' '
   9  0.881  0.690  0.492        35         4 ' '
  10  0.119  0.310  0.508        35         4 ' '
  11  0.984  0.362  0.655        77        12 ' '
  12  0.034  0.652  0.676        16        -2 ' '
  13  0.516  0.862  0.845        77        12 ' '
  14  0.466  0.152  0.824        16        -2 ' '

loop_
 _atom_site_label
 _atom_site_type_symbol
 _atom_site_fract_x
 _atom_site_fract_y
 _atom_site_fract_z
 _atom_site_U_iso_or_equiv
 _atom_site_adp_type
 _atom_site_occupancy
 _atom_site_site_symmetry_order  
 _atom_site_calc_flag
 _atom_site_refinement_flags_posn
 _atom_site_refinement_flags_adp
 _atom_site_refinement_flags_occupancy
 _atom_site_disorder_assembly
 _atom_site_disorder_group
Gd1 Gd 0.47644(3) 0.39845(2) 0.57076(2) 0.01926(11) Uani 1 1 d . . . . .
Gd2 Gd 0.57882(4) 0.29077(2) 0.62370(2) 0.02036(11) Uani 1 1 d . . . . .
Gd3 Gd 0.40455(4) 0.44223(2) 0.69486(2) 0.02381(12) Uani 1 1 d . . . . .
Gd4 Gd 0.49714(4) 0.25861(2) 0.75150(2) 0.02794(13) Uani 1 1 d . . . . .
Gd5 Gd 0.52786(4) 0.38510(2) 0.80633(2) 0.03138(14) Uani 1 1 d . . . . .
Co1 Co 0.36808(10) 0.49333(3) 0.59400(4) 0.0234(3) Uani 1 1 d . . . . .
Co2 Co 0.59297(11) 0.19324(3) 0.67300(4) 0.0290(3) Uani 1 1 d . . . . .
P1 P 0.61663(19) 0.39483(6) 0.68453(8) 0.0207(5) Uani 1 1 d . . . . .
P2 P 0.36741(19) 0.32750(6) 0.65642(8) 0.0227(5) Uani 1 1 d . . . . .
O1 O 0.3452(5) 0.43406(16) 0.6156(2) 0.0250(14) Uani 1 1 d . . . . .
O2 O 0.6371(5) 0.40694(17) 0.5312(2) 0.0261(14) Uani 1 1 d . . . . .
O3 O 0.6443(5) 0.35004(17) 0.5779(2) 0.0239(14) Uani 1 1 d . . . . .
O4 O 0.4262(5) 0.33914(15) 0.6132(2) 0.0199(13) Uani 1 1 d . . . . .
O5 O 0.5464(5) 0.41526(16) 0.6462(2) 0.0230(13) Uani 1 1 d . . . . .
O6 O 0.5129(5) 0.27830(18) 0.5469(2) 0.0268(14) Uani 1 1 d . . . . .
O7 O 0.4366(5) 0.29244(16) 0.6812(2) 0.0211(13) Uani 1 1 d . . . . .
O8 O 0.4866(4) 0.47328(15) 0.56479(19) 0.0170(12) Uani 1 1 d . . . . .
O9 O 0.3489(5) 0.36699(16) 0.6870(2) 0.0250(14) Uani 1 1 d . . . . .
O10 O 0.2430(5) 0.51609(17) 0.6193(2) 0.0255(14) Uani 1 1 d . . . . .
O11 O 0.4642(5) 0.34328(17) 0.5152(2) 0.0232(13) Uani 1 1 d . . . . .
O12 O 0.2815(5) 0.48530(17) 0.5391(2) 0.0266(14) Uani 1 1 d . . . . .
O13 O 0.3281(5) 0.41652(17) 0.5218(2) 0.0248(14) Uani 1 1 d . . . . .
O14 O 0.5574(5) 0.40219(16) 0.7290(2) 0.0238(14) Uani 1 1 d . . . . .
O15 O 0.5222(5) 0.21844(16) 0.6218(2) 0.0294(15) Uani 1 1 d . . . . .
O16 O 0.7330(5) 0.25336(18) 0.6073(2) 0.0307(16) Uani 1 1 d . . . . .
O17 O 0.6277(5) 0.25209(16) 0.6932(2) 0.0261(14) Uani 1 1 d . . . . .
O18 O 0.2444(5) 0.48053(19) 0.6874(2) 0.0339(16) Uani 1 1 d . . . . .
O19 O 0.4438(5) 0.50328(16) 0.6499(2) 0.0267(14) Uani 1 1 d . . . . .
O20 O 0.6281(5) 0.20996(18) 0.7807(2) 0.0330(16) Uani 1 1 d . . . . .
O21 O 0.3523(6) 0.41875(19) 0.7678(2) 0.0345(16) Uani 1 1 d . . . . .
O22 O 0.6240(5) 0.31835(19) 0.7677(2) 0.0353(17) Uani 1 1 d . . . . .
O23 O 0.6687(5) 0.16463(19) 0.7229(2) 0.0344(17) Uani 1 1 d . . . . .
O24 O 0.6397(5) 0.34625(16) 0.6771(2) 0.0235(14) Uani 1 1 d . . . . .
O25 O 0.2571(6) 0.2897(2) 0.8051(3) 0.0419(18) Uani 1 1 d . . . . .
O26 O 0.3297(6) 0.2351(2) 0.7664(2) 0.0365(17) Uani 1 1 d . . . . .
O27 O 0.7168(6) 0.18615(19) 0.6401(2) 0.0388(18) Uani 1 1 d . . . . .
O28 O 0.4075(5) 0.32968(18) 0.7709(2) 0.0285(15) Uani 1 1 d . . . . .
O29 O 0.4946(6) 0.2605(2) 0.8319(2) 0.0386(18) Uani 1 1 d . . . . .
O30 O 0.4637(6) 0.49653(19) 0.7466(2) 0.0352(17) Uani 1 1 d . . . . .
O31 O 0.5422(6) 0.4621(2) 0.8073(2) 0.0404(18) Uani 1 1 d . . . . .
O32 O 0.4754(5) 0.19641(18) 0.7083(2) 0.0355(17) Uani 1 1 d . . . . .
O33 O 0.3697(6) 0.3998(2) 0.8419(3) 0.0439(19) Uani 1 1 d . . . . .
N1 N 0.4098(6) 0.5517(2) 0.5771(3) 0.0268(18) Uani 1 1 d . . . . .
N2 N 0.5416(7) 0.1377(2) 0.6510(3) 0.040(2) Uani 1 1 d . . . . .
C1 C 0.6810(7) 0.3710(2) 0.5438(3) 0.0201(18) Uani 1 1 d . . . . .
O34 O 0.5336(7) 0.3283(2) 0.8582(3) 0.052(2) Uani 1 1 d . . . . .
O35 O 0.6007(9) 0.4111(3) 0.8842(3) 0.061(2) Uani 1 1 d . . . . .
C2 C 0.7444(8) 0.3070(3) 0.5015(3) 0.029(2) Uani 1 1 d . . . . .
H2A H 0.7346 0.2879 0.5273 0.043 Uiso 1 1 calc R U . . .
H2B H 0.7992 0.2957 0.4835 0.043 Uiso 1 1 calc R U . . .
H2C H 0.6808 0.3086 0.4824 0.043 Uiso 1 1 calc R U . . .
C3 C 0.2693(7) 0.4501(3) 0.5159(3) 0.027(2) Uani 1 1 d . . . . .
C4 C 0.4414(8) 0.2787(3) 0.4683(3) 0.029(2) Uani 1 1 d . . . . .
C5 C 0.7741(7) 0.3534(3) 0.5194(3) 0.028(2) Uani 1 1 d . . . . .
C6 C 0.2095(7) 0.5079(3) 0.6583(3) 0.027(2) Uani 1 1 d . . . . .
O36 O 0.7113(8) 0.3863(3) 0.8297(4) 0.067(3) Uani 0.9514 1 d . . P . .
C7 C 0.7647(9) 0.2144(3) 0.6157(3) 0.034(2) Uani 1 1 d . . . . .
C8 C 0.7374(7) 0.4259(3) 0.6899(3) 0.027(2) Uani 1 1 d . . . . .
C9 C 0.4774(7) 0.3020(2) 0.5137(3) 0.025(2) Uani 1 1 d . . . . .
C10 C 0.5066(7) 0.5489(3) 0.5498(3) 0.028(2) Uani 1 1 d . . . . .
H10A H 0.5509 0.5742 0.5562 0.033 Uiso 1 1 calc R U . . .
H10B H 0.4878 0.5481 0.5169 0.033 Uiso 1 1 calc R U . . .
C11 C 0.5640(7) 0.5067(2) 0.5648(3) 0.025(2) Uani 1 1 d . . . . .
H11A H 0.6168 0.4994 0.5432 0.031 Uiso 1 1 calc R U . . .
H11B H 0.5976 0.5101 0.5954 0.031 Uiso 1 1 calc R U . . .
C12 C 0.8674(7) 0.3520(4) 0.5543(4) 0.037(2) Uani 1 1 d . . . . .
H12A H 0.8856 0.3815 0.5637 0.056 Uiso 1 1 calc R U . . .
H12B H 0.9257 0.3386 0.5402 0.056 Uiso 1 1 calc R U . . .
H12C H 0.8499 0.3352 0.5809 0.056 Uiso 1 1 calc R U . . .
C13 C 0.2437(8) 0.3049(3) 0.6376(4) 0.033(2) Uani 1 1 d . . . . .
C14 C 0.6705(8) 0.1761(3) 0.7650(4) 0.031(2) Uani 1 1 d . . . . .
C15 C 0.4771(8) 0.5481(3) 0.6557(3) 0.032(2) Uani 1 1 d . . . . .
H15A H 0.5517 0.5501 0.6521 0.038 Uiso 1 1 calc R U . . .
H15B H 0.4633 0.5581 0.6867 0.038 Uiso 1 1 calc R U . . .
C16 C 0.1151(8) 0.5365(3) 0.6719(4) 0.035(2) Uani 1 1 d . . . . .
C17 C 0.5066(11) 0.2376(3) 0.4604(4) 0.050(3) Uani 1 1 d . . . . .
H17A H 0.4798 0.2227 0.4329 0.074 Uiso 1 1 calc R U . . .
H17B H 0.5032 0.2183 0.4866 0.074 Uiso 1 1 calc R U . . .
H17C H 0.5779 0.2459 0.4567 0.074 Uiso 1 1 calc R U . . .
C18 C 0.1759(7) 0.4472(3) 0.4828(3) 0.029(2) Uani 1 1 d . . . . .
C19 C 0.4207(8) 0.5768(3) 0.6207(3) 0.030(2) Uani 1 1 d . . . . .
H19A H 0.3525 0.5846 0.6311 0.036 Uiso 1 1 calc R U . . .
H19B H 0.4599 0.6036 0.6162 0.036 Uiso 1 1 calc R U . . .
C20 C 0.7850(9) 0.4241(4) 0.6424(4) 0.047(3) Uani 1 1 d . . . . .
H20A H 0.8496 0.4401 0.6436 0.070 Uiso 1 1 calc R U . . .
H20B H 0.7374 0.4370 0.6195 0.070 Uiso 1 1 calc R U . . .
H20C H 0.7977 0.3940 0.6343 0.070 Uiso 1 1 calc R U . . .
C21 C 0.1826(9) 0.2911(4) 0.6782(4) 0.052(3) Uani 1 1 d . . . . .
H21A H 0.1722 0.3161 0.6978 0.078 Uiso 1 1 calc R U . . .
H21B H 0.2206 0.2688 0.6956 0.078 Uiso 1 1 calc R U . . .
H21C H 0.1161 0.2796 0.6672 0.078 Uiso 1 1 calc R U . . .
C22 C 0.7977(9) 0.3814(3) 0.4781(4) 0.042(3) Uani 1 1 d . . . . .
H22A H 0.7409 0.3794 0.4551 0.063 Uiso 1 1 calc R U . . .
H22B H 0.8607 0.3711 0.4651 0.063 Uiso 1 1 calc R U . . .
H22C H 0.8065 0.4114 0.4877 0.063 Uiso 1 1 calc R U . . .
C23 C 0.7147(9) 0.4735(3) 0.7022(4) 0.039(3) Uani 1 1 d . . . . .
H23A H 0.6801 0.4745 0.7308 0.059 Uiso 1 1 calc R U . . .
H23B H 0.6706 0.4865 0.6780 0.059 Uiso 1 1 calc R U . . .
H23C H 0.7791 0.4896 0.7055 0.059 Uiso 1 1 calc R U . . .
C24 C 0.7332(8) 0.1464(3) 0.7988(4) 0.033(2) Uani 1 1 d . . . . .
C25 C 0.4989(11) 0.1879(3) 0.5870(4) 0.059(4) Uani 1 1 d . . . . .
H25 H 0.4904 0.1953 0.5558 0.071 Uiso 1 1 calc R U . . .
C26 C 0.4650(10) 0.1224(3) 0.6838(4) 0.048(3) Uani 1 1 d . . . . .
H26A H 0.5008 0.1077 0.7099 0.058 Uiso 1 1 calc R U . . .
H26B H 0.4172 0.1016 0.6686 0.058 Uiso 1 1 calc R U . . .
C27 C 0.5608(10) 0.2985(4) 0.9491(4) 0.056(3) Uani 1 1 d . . . . .
H27A H 0.5428 0.2910 0.9799 0.084 Uiso 1 1 calc R U . . .
H27B H 0.5537 0.3297 0.9446 0.084 Uiso 1 1 calc R U . . .
H27C H 0.6316 0.2899 0.9447 0.084 Uiso 1 1 calc R U . . .
C28 C 0.9294(10) 0.2333(4) 0.5771(5) 0.066(4) Uani 1 1 d . . . . .
H28A H 0.8887 0.2484 0.5532 0.099 Uiso 1 1 calc R U . . .
H28B H 0.9904 0.2209 0.5644 0.099 Uiso 1 1 calc R U . . .
H28C H 0.9501 0.2537 0.6013 0.099 Uiso 1 1 calc R U . . .
C29 C 0.1803(9) 0.3397(3) 0.6096(4) 0.046(3) Uani 1 1 d . . . . .
H29A H 0.1122 0.3282 0.6010 0.069 Uiso 1 1 calc R U . . .
H29B H 0.2155 0.3469 0.5821 0.069 Uiso 1 1 calc R U . . .
H29C H 0.1734 0.3656 0.6281 0.069 Uiso 1 1 calc R U . . .
C30 C 0.2591(8) 0.2511(3) 0.7914(4) 0.037(2) Uani 1 1 d . . . . .
C31 C 0.3130(10) 0.4123(3) 0.8083(5) 0.050(3) Uani 1 1 d . . . . .
C32 C 0.5050(8) 0.2870(3) 0.8630(4) 0.038(3) Uani 1 1 d . . . . .
C33 C 0.4860(10) 0.2739(3) 0.9131(4) 0.045(3) Uani 1 1 d . . . . .
C34 C 0.3271(10) 0.2669(4) 0.4718(4) 0.056(3) Uani 1 1 d . . . . .
H34A H 0.2891 0.2925 0.4806 0.084 Uiso 1 1 calc R U . . .
H34B H 0.3208 0.2444 0.4948 0.084 Uiso 1 1 calc R U . . .
H34C H 0.2993 0.2564 0.4423 0.084 Uiso 1 1 calc R U . . .
C35 C 0.1737(10) 0.2203(3) 0.8057(4) 0.050(3) Uani 1 1 d . . . . .
C36 C 0.1356(9) 0.4935(3) 0.4696(4) 0.042(3) Uani 1 1 d . . . . .
H36A H 0.1016 0.5061 0.4952 0.063 Uiso 1 1 calc R U . . .
H36B H 0.0869 0.4915 0.4432 0.063 Uiso 1 1 calc R U . . .
H36C H 0.1934 0.5118 0.4620 0.063 Uiso 1 1 calc R U . . .
C37 C 0.5030(9) 0.4952(3) 0.7879(4) 0.041(3) Uani 1 1 d . . . . .
C38 C 0.4518(9) 0.3097(3) 0.4283(3) 0.040(3) Uani 1 1 d . . . . .
H38A H 0.4133 0.2983 0.4014 0.060 Uiso 1 1 calc R U . . .
H38B H 0.5241 0.3125 0.4218 0.060 Uiso 1 1 calc R U . . .
H38C H 0.4245 0.3380 0.4360 0.060 Uiso 1 1 calc R U . . .
C39 C 0.0811(10) 0.5672(4) 0.6314(4) 0.055(3) Uani 1 1 d . . . . .
H39A H 0.0213 0.5840 0.6395 0.082 Uiso 1 1 calc R U . . .
H39B H 0.0634 0.5499 0.6042 0.082 Uiso 1 1 calc R U . . .
H39C H 0.1373 0.5868 0.6252 0.082 Uiso 1 1 calc R U . . .
C40 C 0.2626(10) 0.2634(3) 0.6074(5) 0.054(3) Uani 1 1 d . . . . .
H40A H 0.3000 0.2417 0.6259 0.082 Uiso 1 1 calc R U . . .
H40B H 0.3026 0.2714 0.5816 0.082 Uiso 1 1 calc R U . . .
H40C H 0.1966 0.2514 0.5962 0.082 Uiso 1 1 calc R U . . .
C41 C 0.0919(9) 0.4238(4) 0.5089(4) 0.051(3) Uani 1 1 d . . . . .
H41A H 0.1204 0.3975 0.5229 0.077 Uiso 1 1 calc R U . . .
H41B H 0.0344 0.4164 0.4877 0.077 Uiso 1 1 calc R U . . .
H41C H 0.0680 0.4429 0.5326 0.077 Uiso 1 1 calc R U . . .
C42 C 0.4893(16) 0.1445(4) 0.6036(5) 0.104(7) Uani 1 1 d . . . . .
H42A H 0.5198 0.1244 0.5819 0.125 Uiso 1 1 calc R U . . .
H42B H 0.4158 0.1373 0.6046 0.125 Uiso 1 1 calc R U . . .
C43 C 0.8113(9) 0.4059(4) 0.7252(4) 0.051(3) Uani 1 1 d . . . . .
H43A H 0.8778 0.4203 0.7246 0.077 Uiso 1 1 calc R U . . .
H43B H 0.8195 0.3752 0.7186 0.077 Uiso 1 1 calc R U . . .
H43C H 0.7844 0.4092 0.7554 0.077 Uiso 1 1 calc R U . . .
C44 C 0.3731(11) 0.2875(5) 0.9207(5) 0.065(4) Uani 1 1 d . . . . .
H44A H 0.3264 0.2711 0.9002 0.097 Uiso 1 1 calc R U . . .
H44B H 0.3647 0.3183 0.9145 0.097 Uiso 1 1 calc R U . . .
H44C H 0.3574 0.2816 0.9523 0.097 Uiso 1 1 calc R U . . .
C45 C 0.4071(10) 0.1606(3) 0.7001(4) 0.050(3) Uani 1 1 d . . . . .
H45A H 0.3528 0.1687 0.6770 0.060 Uiso 1 1 calc R U . . .
H45B H 0.3740 0.1531 0.7285 0.060 Uiso 1 1 calc R U . . .
C46 C 0.2031(10) 0.4218(3) 0.4409(4) 0.053(3) Uani 1 1 d . . . . .
H46A H 0.2536 0.4379 0.4243 0.079 Uiso 1 1 calc R U . . .
H46B H 0.1413 0.4174 0.4211 0.079 Uiso 1 1 calc R U . . .
H46C H 0.2317 0.3938 0.4502 0.079 Uiso 1 1 calc R U . . .
C47 C 0.4974(11) 0.2246(4) 0.9191(4) 0.060(4) Uani 1 1 d . . . . .
H47A H 0.4436 0.2100 0.9006 0.090 Uiso 1 1 calc R U . . .
H47B H 0.4914 0.2171 0.9511 0.090 Uiso 1 1 calc R U . . .
H47C H 0.5645 0.2156 0.9094 0.090 Uiso 1 1 calc R U . . .
C48 C 0.1461(11) 0.5631(4) 0.7127(4) 0.064(4) Uani 1 1 d . . . . .
H48A H 0.0882 0.5809 0.7211 0.096 Uiso 1 1 calc R U . . .
H48B H 0.2036 0.5817 0.7057 0.096 Uiso 1 1 calc R U . . .
H48C H 0.1668 0.5441 0.7381 0.096 Uiso 1 1 calc R U . . .
C49 C 0.5080(13) 0.5386(4) 0.8142(4) 0.066(4) Uani 1 1 d . . . . .
C50 C 0.0278(10) 0.5053(4) 0.6827(6) 0.082(6) Uani 1 1 d . . . . .
H50A H 0.0478 0.4886 0.7100 0.123 Uiso 1 1 calc R U . . .
H50B H 0.0145 0.4856 0.6571 0.123 Uiso 1 1 calc R U . . .
H50C H -0.0342 0.5218 0.6880 0.123 Uiso 1 1 calc R U . . .
C51 C 0.7046(10) 0.0979(3) 0.7881(4) 0.051(3) Uani 1 1 d . . . . .
H51A H 0.7515 0.0789 0.8056 0.076 Uiso 1 1 calc R U . . .
H51B H 0.7103 0.0924 0.7556 0.076 Uiso 1 1 calc R U . . .
H51C H 0.6343 0.0924 0.7963 0.076 Uiso 1 1 calc R U . . .
C52 C 0.8645(11) 0.1968(4) 0.5970(5) 0.072(5) Uani 1 1 d . . . . .
C53 C 0.8508(9) 0.1542(4) 0.7910(5) 0.059(4) Uani 1 1 d . . . . .
H53A H 0.8666 0.1849 0.7947 0.089 Uiso 1 1 calc R U . . .
H53B H 0.8657 0.1450 0.7603 0.089 Uiso 1 1 calc R U . . .
H53C H 0.8927 0.1375 0.8133 0.089 Uiso 1 1 calc R U . . .
C54 C 0.1805(16) 0.4707(6) 0.8109(7) 0.132(9) Uani 1 1 d . . . . .
H54A H 0.2345 0.4842 0.8304 0.197 Uiso 1 1 calc R U . . .
H54B H 0.1136 0.4776 0.8224 0.197 Uiso 1 1 calc R U . . .
H54C H 0.1838 0.4816 0.7798 0.197 Uiso 1 1 calc R U . . .
C55 C 0.1961(12) 0.4201(5) 0.8110(6) 0.073(5) Uani 1 1 d . . . . .
C56 C 0.7116(10) 0.1565(3) 0.8476(4) 0.051(3) Uani 1 1 d . . . . .
H56A H 0.7302 0.1865 0.8544 0.076 Uiso 1 1 calc R U . . .
H56B H 0.7520 0.1373 0.8680 0.076 Uiso 1 1 calc R U . . .
H56C H 0.6387 0.1522 0.8521 0.076 Uiso 1 1 calc R U . . .
C57 C 0.1592(12) 0.3999(6) 0.8547(6) 0.113(7) Uani 1 1 d . . . . .
H57A H 0.2165 0.3853 0.8711 0.170 Uiso 1 1 calc R U . . .
H57B H 0.1050 0.3789 0.8470 0.170 Uiso 1 1 calc R U . . .
H57C H 0.1325 0.4225 0.8740 0.170 Uiso 1 1 calc R U . . .
C58 C 0.1324(12) 0.1938(5) 0.7637(5) 0.081(5) Uani 1 1 d . . . . .
H58A H 0.0988 0.2132 0.7414 0.121 Uiso 1 1 calc R U . . .
H58B H 0.0831 0.1723 0.7733 0.121 Uiso 1 1 calc R U . . .
H58C H 0.1895 0.1791 0.7500 0.121 Uiso 1 1 calc R U . . .
C59 C 0.6979(17) 0.4066(5) 0.8729(6) 0.082(5) Uani 1 1 d . . . . .
C60 C 0.0862(12) 0.2452(5) 0.8259(6) 0.090(6) Uani 1 1 d . . . . .
H60A H 0.1145 0.2681 0.8458 0.136 Uiso 1 1 calc R U . . .
H60B H 0.0452 0.2256 0.8435 0.136 Uiso 1 1 calc R U . . .
H60C H 0.0429 0.2581 0.8014 0.136 Uiso 1 1 calc R U . . .
C61 C 0.1384(12) 0.3991(7) 0.7699(7) 0.122(8) Uani 1 1 d . . . . .
H61A H 0.1206 0.4212 0.7471 0.183 Uiso 1 1 calc R U . . .
H61B H 0.0758 0.3855 0.7797 0.183 Uiso 1 1 calc R U . . .
H61C H 0.1820 0.3772 0.7568 0.183 Uiso 1 1 calc R U . . .
C62 C 0.2241(13) 0.1874(5) 0.8410(6) 0.089(5) Uani 1 1 d . . . . .
H62A H 0.2846 0.1744 0.8284 0.134 Uiso 1 1 calc R U . . .
H62B H 0.1747 0.1647 0.8473 0.134 Uiso 1 1 calc R U . . .
H62C H 0.2442 0.2025 0.8692 0.134 Uiso 1 1 calc R U . . .
C63 C 0.4357(16) 0.5708(5) 0.7972(6) 0.116(8) Uani 1 1 d . . . . .
H63A H 0.3671 0.5635 0.8066 0.173 Uiso 1 1 calc R U . . .
H63B H 0.4353 0.5718 0.7640 0.173 Uiso 1 1 calc R U . . .
H63C H 0.4557 0.5991 0.8096 0.173 Uiso 1 1 calc R U . . .
C64 C 0.515(2) 0.5308(5) 0.8647(5) 0.131(9) Uani 1 1 d . . . . .
H64A H 0.5496 0.5551 0.8800 0.197 Uiso 1 1 calc R U . . .
H64B H 0.5537 0.5043 0.8713 0.197 Uiso 1 1 calc R U . . .
H64C H 0.4459 0.5278 0.8756 0.197 Uiso 1 1 calc R U . . .
C65 C 0.931(2) 0.1764(11) 0.6375(10) 0.29(3) Uani 1 1 d . . . . .
H65A H 0.9235 0.1935 0.6650 0.438 Uiso 1 1 calc R U . . .
H65B H 1.0032 0.1762 0.6300 0.438 Uiso 1 1 calc R U . . .
H65C H 0.9084 0.1468 0.6427 0.438 Uiso 1 1 calc R U . . .
C66 C 0.836(2) 0.1641(7) 0.5606(11) 0.229(19) Uani 1 1 d . . . . .
H66A H 0.7865 0.1437 0.5720 0.343 Uiso 1 1 calc R U . . .
H66B H 0.8976 0.1485 0.5525 0.343 Uiso 1 1 calc R U . . .
H66C H 0.8060 0.1789 0.5337 0.343 Uiso 1 1 calc R U . . .
C67 C 0.6179(19) 0.5580(6) 0.8005(10) 0.194(13) Uani 1 1 d . . . . .
H67A H 0.6482 0.5388 0.7786 0.292 Uiso 1 1 calc R U . . .
H67B H 0.6638 0.5603 0.8278 0.292 Uiso 1 1 calc R U . . .
H67C H 0.6077 0.5867 0.7870 0.292 Uiso 1 1 calc R U . . .
C68 C 0.797(2) 0.4164(8) 0.9070(10) 0.162(13) Uani 1 1 d . . . . .
O37 O 0.500(2) 0.4425(9) 0.9535(8) 0.245(12) Uani 1 1 d . . . . .
H37 H 0.5011 0.4651 0.9379 0.368 Uiso 1 1 calc R U . . .
C69 C 0.402(3) 0.4262(14) 0.9518(16) 0.36(4) Uani 1 1 d . . . . .
H69A H 0.3678 0.4350 0.9790 0.537 Uiso 1 1 calc R U . . .
H69B H 0.4048 0.3947 0.9503 0.537 Uiso 1 1 calc R U . . .
H69C H 0.3639 0.4373 0.9247 0.537 Uiso 1 1 calc R U . . .
C70 C 0.705(6) 0.332(2) 0.798(2) 0.42(4) Uiso 1 1 d . . . . .
C71 C 0.8069(8) 0.3131(3) 0.8103(3) 0.0268(19) Uiso 1 1 d . . . . .
C72 C 0.909(5) 0.351(2) 0.819(2) 0.57(4) Uiso 1 1 d . . . . .
H72A H 0.9126 0.3608 0.8509 0.855 Uiso 1 1 calc R U . . .
H72B H 0.8957 0.3765 0.7993 0.855 Uiso 1 1 calc R U . . .
H72C H 0.9738 0.3381 0.8119 0.855 Uiso 1 1 calc R U . . .
C73 C 0.873(3) 0.3788(12) 0.9150(14) 0.081(15) Uiso 0.44(4) 1 d . . P A 1
C74 C 0.8002(12) 0.2814(4) 0.8488(5) 0.050(5) Uiso 0.85(3) 1 d . . P B 1
H74A H 0.7521 0.2923 0.8704 0.075 Uiso 0.85(3) 1 calc R U P B 1
H74B H 0.8679 0.2779 0.8642 0.075 Uiso 0.85(3) 1 calc R U P B 1
H74C H 0.7763 0.2536 0.8367 0.075 Uiso 0.85(3) 1 calc R U P B 1
C75 C 0.852(4) 0.4564(16) 0.8654(17) 0.36(3) Uiso 1 1 d . . . . .
H75A H 0.9071 0.4425 0.8495 0.534 Uiso 1 1 calc R U . . .
H75B H 0.8794 0.4815 0.8822 0.534 Uiso 1 1 calc R U . . .
H75C H 0.7980 0.4656 0.8433 0.534 Uiso 1 1 calc R U . . .
C76 C 0.766(4) 0.3883(15) 0.9529(16) 0.18(3) Uani 0.56(4) 1 d . . P A 2
C78 C 0.8392(18) 0.2791(7) 0.7545(8) 0.226(8) Uiso 1 1 d . . . . .
H78A H 0.8877 0.2561 0.7630 0.339 Uiso 1 1 calc R U . . .
H78B H 0.8695 0.2982 0.7325 0.339 Uiso 1 1 calc R U . . .
H78C H 0.7762 0.2665 0.7409 0.339 Uiso 1 1 calc R U . . .
 
loop_
 _atom_site_aniso_label
 _atom_site_aniso_U_11
 _atom_site_aniso_U_22
 _atom_site_aniso_U_33
 _atom_site_aniso_U_23
 _atom_site_aniso_U_13
 _atom_site_aniso_U_12
Gd1 0.0195(3) 0.01539(17) 0.0233(2) 0.00156(14) 0.00421(18) 0.00215(15)
Gd2 0.0219(3) 0.01684(17) 0.0226(2) 0.00144(14) 0.00318(19) 0.00207(15)
Gd3 0.0253(3) 0.01825(18) 0.0288(3) -0.00018(15) 0.0094(2) 0.00198(16)
Gd4 0.0292(3) 0.0284(2) 0.0268(3) 0.00697(17) 0.0080(2) 0.00649(18)
Gd5 0.0409(3) 0.0292(2) 0.0249(3) -0.00115(17) 0.0101(2) -0.0036(2)
Co1 0.0229(7) 0.0170(5) 0.0307(7) 0.0006(4) 0.0048(6) 0.0034(4)
Co2 0.0369(9) 0.0194(5) 0.0313(8) 0.0062(5) 0.0085(6) 0.0054(5)
P1 0.0203(13) 0.0195(9) 0.0227(13) 0.0003(8) 0.0037(10) 0.0002(8)
P2 0.0197(13) 0.0190(9) 0.0299(14) 0.0031(8) 0.0047(10) -0.0004(8)
O1 0.028(4) 0.018(2) 0.029(4) 0.000(2) 0.004(3) 0.006(2)
O2 0.025(4) 0.018(3) 0.036(4) 0.007(2) 0.014(3) 0.008(2)
O3 0.016(3) 0.019(3) 0.036(4) 0.001(2) 0.002(3) -0.001(2)
O4 0.022(4) 0.014(2) 0.025(3) 0.002(2) 0.006(3) -0.001(2)
O5 0.018(4) 0.020(3) 0.031(4) -0.001(2) 0.002(3) -0.001(2)
O6 0.027(4) 0.027(3) 0.026(4) -0.001(2) 0.000(3) -0.002(3)
O7 0.023(4) 0.021(3) 0.020(3) 0.003(2) 0.007(3) -0.002(2)
O8 0.016(3) 0.015(2) 0.021(3) 0.005(2) 0.007(2) 0.000(2)
O9 0.025(4) 0.018(2) 0.033(4) 0.003(2) 0.013(3) -0.003(2)
O10 0.021(4) 0.023(3) 0.032(4) -0.003(2) 0.006(3) 0.002(2)
O11 0.024(4) 0.025(3) 0.020(3) -0.002(2) 0.001(3) 0.001(2)
O12 0.024(4) 0.024(3) 0.030(4) 0.000(2) -0.004(3) 0.004(2)
O13 0.020(4) 0.022(3) 0.031(4) 0.005(2) -0.002(3) 0.007(2)
O14 0.029(4) 0.018(2) 0.026(4) 0.001(2) 0.006(3) 0.001(2)
O15 0.053(5) 0.013(2) 0.023(3) 0.000(2) 0.002(3) -0.004(3)
O16 0.034(4) 0.023(3) 0.037(4) 0.005(2) 0.017(3) 0.015(3)
O17 0.034(4) 0.017(2) 0.027(4) 0.005(2) 0.006(3) 0.002(2)
O18 0.033(4) 0.030(3) 0.040(4) 0.006(3) 0.012(3) 0.009(3)
O19 0.030(4) 0.015(2) 0.036(4) 0.000(2) 0.010(3) 0.001(2)
O20 0.041(5) 0.021(3) 0.037(4) 0.007(3) 0.002(3) 0.005(3)
O21 0.044(5) 0.029(3) 0.033(4) 0.003(3) 0.018(3) 0.002(3)
O22 0.032(4) 0.028(3) 0.046(5) 0.000(3) 0.014(3) -0.006(3)
O23 0.037(5) 0.030(3) 0.037(4) 0.013(3) 0.012(3) 0.009(3)
O24 0.031(4) 0.018(2) 0.021(3) 0.001(2) -0.004(3) 0.000(2)
O25 0.041(5) 0.042(4) 0.044(5) 0.003(3) 0.013(4) 0.005(3)
O26 0.040(5) 0.034(3) 0.037(4) 0.001(3) 0.006(3) -0.001(3)
O27 0.052(5) 0.030(3) 0.036(4) 0.013(3) 0.017(4) 0.010(3)
O28 0.030(4) 0.027(3) 0.028(4) -0.004(2) 0.000(3) 0.003(3)
O29 0.053(5) 0.035(3) 0.028(4) 0.000(3) 0.008(4) 0.003(3)
O30 0.059(5) 0.026(3) 0.021(4) -0.006(2) 0.003(3) 0.001(3)
O31 0.058(5) 0.032(3) 0.031(4) -0.005(3) 0.006(4) -0.004(3)
O32 0.042(5) 0.020(3) 0.046(4) 0.007(3) 0.014(3) 0.004(3)
O33 0.048(5) 0.051(4) 0.033(5) 0.002(3) 0.010(4) 0.005(4)
N1 0.029(5) 0.015(3) 0.037(5) 0.002(3) 0.011(4) 0.001(3)
N2 0.059(7) 0.028(4) 0.035(5) 0.002(3) 0.018(5) 0.003(4)
C1 0.018(5) 0.021(4) 0.021(5) 0.002(3) 0.003(4) 0.002(3)
O34 0.065(6) 0.058(5) 0.031(4) 0.010(3) -0.007(4) -0.023(4)
O35 0.088(8) 0.057(5) 0.038(5) -0.007(4) 0.004(5) -0.008(5)
C2 0.026(6) 0.023(4) 0.039(6) -0.005(4) 0.011(5) 0.008(4)
C3 0.022(5) 0.025(4) 0.035(6) 0.001(3) 0.013(4) -0.002(3)
C4 0.036(6) 0.030(4) 0.021(5) -0.004(3) 0.000(4) -0.006(4)
C5 0.024(6) 0.023(4) 0.036(6) 0.003(4) 0.014(4) 0.002(4)
C6 0.022(5) 0.024(4) 0.038(6) -0.008(4) 0.013(4) -0.004(4)
O36 0.055(7) 0.070(6) 0.078(8) 0.030(5) 0.012(5) -0.002(5)
C7 0.041(7) 0.034(5) 0.027(6) 0.010(4) 0.011(5) 0.015(4)
C8 0.023(6) 0.028(4) 0.030(6) -0.007(4) 0.000(4) -0.004(4)
C9 0.028(6) 0.018(4) 0.029(5) 0.003(3) 0.001(4) 0.003(3)
C10 0.026(6) 0.021(4) 0.038(6) -0.001(3) 0.013(4) -0.003(3)
C11 0.027(6) 0.018(3) 0.032(6) 0.001(3) 0.008(4) -0.001(3)
C12 0.015(6) 0.060(6) 0.037(6) -0.008(5) 0.001(5) 0.006(4)
C13 0.022(6) 0.035(5) 0.042(6) 0.002(4) 0.006(5) -0.004(4)
C14 0.025(6) 0.024(4) 0.045(7) 0.012(4) 0.001(5) -0.011(4)
C15 0.040(7) 0.021(4) 0.036(6) -0.001(3) 0.010(5) 0.003(4)
C16 0.029(6) 0.033(5) 0.045(7) -0.003(4) 0.012(5) 0.011(4)
C17 0.095(11) 0.027(4) 0.026(6) -0.009(4) -0.009(6) 0.007(5)
C18 0.013(5) 0.036(5) 0.038(6) -0.003(4) -0.004(4) 0.003(4)
C19 0.038(6) 0.021(4) 0.033(6) -0.008(3) 0.013(5) 0.001(4)
C20 0.027(7) 0.061(7) 0.055(8) -0.018(5) 0.020(5) -0.023(5)
C21 0.030(7) 0.070(8) 0.057(8) 0.017(6) -0.002(6) -0.028(6)
C22 0.034(7) 0.037(5) 0.057(8) 0.010(5) 0.025(6) 0.003(4)
C23 0.041(7) 0.027(4) 0.050(7) -0.007(4) 0.007(5) -0.015(4)
C24 0.029(6) 0.027(4) 0.041(6) 0.019(4) 0.001(5) -0.001(4)
C25 0.117(12) 0.020(4) 0.037(7) -0.009(4) -0.017(7) 0.001(5)
C26 0.055(8) 0.033(5) 0.058(8) 0.004(5) 0.017(6) -0.012(5)
C27 0.055(9) 0.090(9) 0.022(6) 0.012(6) -0.003(6) -0.003(7)
C28 0.041(8) 0.083(9) 0.078(10) 0.036(7) 0.035(7) 0.025(7)
C29 0.032(7) 0.044(6) 0.059(8) 0.013(5) -0.016(6) -0.005(5)
C30 0.027(6) 0.034(5) 0.050(7) 0.006(4) 0.008(5) 0.006(4)
C31 0.040(8) 0.029(5) 0.084(10) -0.004(5) 0.040(7) 0.000(5)
C32 0.021(6) 0.053(6) 0.040(7) 0.019(5) 0.010(5) 0.004(5)
C33 0.056(8) 0.045(6) 0.035(6) 0.006(5) 0.025(6) -0.003(5)
C34 0.050(8) 0.063(7) 0.056(9) -0.019(6) 0.015(7) -0.021(6)
C35 0.045(8) 0.038(5) 0.067(9) 0.000(5) 0.019(6) -0.010(5)
C36 0.038(7) 0.042(5) 0.045(7) 0.000(5) -0.013(6) 0.004(5)
C37 0.054(8) 0.024(4) 0.046(7) 0.001(4) 0.023(6) -0.004(4)
C38 0.055(8) 0.029(4) 0.035(6) -0.013(4) -0.009(5) -0.003(4)
C39 0.051(9) 0.051(6) 0.061(8) -0.004(5) -0.001(7) 0.027(6)
C40 0.039(8) 0.046(6) 0.078(10) -0.008(6) -0.011(7) -0.015(5)
C41 0.028(7) 0.054(6) 0.070(9) 0.009(6) -0.015(6) -0.002(5)
C42 0.23(2) 0.033(6) 0.043(8) 0.019(5) -0.024(10) -0.049(9)
C43 0.030(7) 0.053(6) 0.070(9) 0.001(6) -0.001(6) -0.013(5)
C44 0.059(10) 0.082(9) 0.056(9) 0.028(7) 0.020(7) 0.013(7)
C45 0.047(8) 0.040(5) 0.065(9) -0.007(5) 0.012(6) -0.011(5)
C46 0.049(8) 0.045(6) 0.062(8) -0.011(5) -0.018(6) 0.008(5)
C47 0.076(10) 0.064(7) 0.043(8) 0.032(6) 0.022(7) 0.019(7)
C48 0.083(11) 0.059(7) 0.051(8) -0.001(6) 0.027(7) 0.020(7)
C49 0.128(14) 0.038(6) 0.033(7) 0.000(5) 0.027(8) -0.002(7)
C50 0.033(8) 0.051(7) 0.167(17) 0.001(8) 0.049(9) 0.004(6)
C51 0.064(9) 0.025(4) 0.061(8) 0.023(5) -0.013(7) -0.002(5)
C52 0.074(10) 0.052(7) 0.097(11) 0.036(7) 0.057(8) 0.034(7)
C53 0.037(8) 0.054(7) 0.086(11) 0.015(7) 0.001(7) 0.003(5)
C54 0.140(19) 0.117(14) 0.145(18) 0.047(13) 0.073(15) 0.101(14)
C55 0.054(10) 0.090(10) 0.080(11) 0.043(8) 0.035(9) 0.026(8)
C56 0.069(10) 0.046(6) 0.036(7) 0.014(5) -0.012(6) 0.007(6)
C57 0.066(12) 0.167(17) 0.114(14) 0.066(13) 0.075(11) 0.042(11)
C58 0.069(11) 0.086(10) 0.089(12) -0.020(8) 0.021(9) -0.034(8)
C59 0.129(18) 0.052(8) 0.067(11) -0.010(7) 0.021(11) 0.004(9)
C60 0.067(11) 0.071(9) 0.141(16) -0.025(9) 0.073(11) -0.026(8)
C61 0.027(10) 0.19(2) 0.154(19) 0.092(16) 0.029(11) 0.000(11)
C62 0.088(12) 0.069(9) 0.111(13) 0.052(9) 0.003(10) -0.031(8)
C63 0.17(2) 0.068(9) 0.103(14) -0.048(9) -0.051(13) 0.060(11)
C64 0.27(3) 0.066(10) 0.057(11) -0.032(8) -0.008(13) 0.018(13)
C65 0.20(3) 0.41(4) 0.28(3) 0.29(4) 0.21(3) 0.28(3)
C66 0.24(3) 0.141(18) 0.33(4) -0.16(2) 0.24(3) -0.094(19)
C67 0.16(2) 0.083(13) 0.34(4) -0.115(18) 0.05(2) -0.073(14)
C68 0.16(2) 0.14(2) 0.17(3) 0.048(18) -0.11(2) -0.056(18)
O37 0.29(3) 0.24(2) 0.23(2) -0.11(2) 0.17(2) -0.08(2)
C69 0.32(5) 0.35(6) 0.44(7) -0.20(5) 0.31(5) -0.22(4)
C76 0.21(7) 0.19(4) 0.12(4) 0.09(3) -0.11(4) -0.09(4)
 
_geom_special_details
;
 All esds (except the esd in the dihedral angle between two l.s. planes)
 are estimated using the full covariance matrix.  The cell esds are taken
 into account individually in the estimation of esds in distances, angles
 and torsion angles; correlations between esds in cell parameters are only
 used when they are defined by crystal symmetry.  An approximate (isotropic)
 treatment of cell esds is used for estimating esds involving l.s. planes.
;
 
loop_
 _geom_bond_atom_site_label_1
 _geom_bond_atom_site_label_2
 _geom_bond_distance
 _geom_bond_site_symmetry_2
 _geom_bond_publ_flag
Gd1 O8 2.286(5) . ?
Gd1 O4 2.292(5) . ?
Gd1 O11 2.321(5) . ?
Gd1 O13 2.372(6) . ?
Gd1 O5 2.367(6) . ?
Gd1 O2 2.424(6) . ?
Gd1 O1 2.432(6) . ?
Gd1 O3 2.607(6) . ?
Gd1 C1 2.900(9) . ?
Gd1 Co1 3.2866(13) . ?
Gd1 Gd2 3.8158(9) . ?
Gd1 Gd3 3.9786(11) . ?
Gd2 O15 2.315(5) . ?
Gd2 O16 2.352(6) . ?
Gd2 O6 2.360(6) . ?
Gd2 O17 2.382(6) . ?
Gd2 O24 2.388(5) . ?
Gd2 O3 2.413(6) . ?
Gd2 O4 2.454(6) . ?
Gd2 O7 2.534(6) . ?
Gd2 P2 3.126(2) . ?
Gd2 Co2 3.2897(13) . ?
Gd3 O30 2.326(6) . ?
Gd3 O19 2.336(5) . ?
Gd3 O18 2.361(6) . ?
Gd3 O1 2.387(6) . ?
Gd3 O9 2.403(5) . ?
Gd3 O14 2.468(6) . ?
Gd3 O5 2.497(6) . ?
Gd3 P1 3.107(2) . ?
Gd3 Co1 3.3124(15) . ?
Gd3 Gd5 3.9157(11) . ?
Gd4 O32 2.274(6) . ?
Gd4 O29 2.326(7) . ?
Gd4 O26 2.326(7) . ?
Gd4 O20 2.360(6) . ?
Gd4 O7 2.369(6) . ?
Gd4 O17 2.446(6) . ?
Gd4 O22 2.466(6) . ?
Gd4 O28 2.525(6) . ?
Gd4 Co2 3.3021(14) . ?
Gd5 O34 2.283(7) . ?
Gd5 O14 2.344(6) . ?
Gd5 O31 2.347(6) . ?
Gd5 O33 2.365(8) . ?
Gd5 O36 2.413(10) . ?
Gd5 O28 2.469(6) . ?
Gd5 O35 2.515(8) . ?
Gd5 O22 2.652(6) . ?
Gd5 O21 2.661(7) . ?
Gd5 C70 2.81(7) . ?
Gd5 C59 2.90(2) . ?
Gd5 C31 2.881(12) . ?
Co1 O19 1.863(7) . ?
Co1 O8 1.880(6) . ?
Co1 O12 1.901(6) . ?
Co1 N1 1.924(6) . ?
Co1 O10 1.927(6) . ?
Co1 O1 1.934(5) . ?
Co2 O15 1.857(6) . ?
Co2 O32 1.868(7) . ?
Co2 N2 1.909(8) . ?
Co2 O23 1.904(7) . ?
Co2 O27 1.908(7) . ?
Co2 O17 1.927(6) . ?
P1 O5 1.521(6) . ?
P1 O24 1.524(5) . ?
P1 O14 1.544(6) . ?
P1 C8 1.814(9) . ?
P2 O9 1.517(6) . ?
P2 O4 1.534(6) . ?
P2 O7 1.538(6) . ?
P2 C13 1.786(10) . ?
O2 C1 1.272(9) . ?
O3 C1 1.286(10) . ?
O6 C9 1.266(10) . ?
O8 C11 1.420(10) . ?
O10 C6 1.251(11) . ?
O11 C9 1.267(9) . ?
O12 C3 1.268(10) . ?
O13 C3 1.275(10) . ?
O15 C25 1.390(11) . ?
O16 C7 1.270(10) . ?
O18 C6 1.249(11) . ?
O19 C15 1.436(9) . ?
O20 C14 1.261(11) . ?
O21 C31 1.313(13) . ?
O22 C70 1.38(7) . ?
O23 C14 1.264(12) . ?
O25 C30 1.240(11) . ?
O26 C30 1.283(12) . ?
O27 C7 1.287(11) . ?
O29 C32 1.207(13) . ?
O30 C37 1.270(13) . ?
O31 C37 1.246(12) . ?
O32 C45 1.410(12) . ?
O33 C31 1.241(15) . ?
N1 C19 1.474(11) . ?
N1 C10 1.508(11) . ?
N2 C26 1.477(13) . ?
N2 C42 1.507(15) . ?
C1 C5 1.515(12) . ?
O34 C32 1.320(12) . ?
O35 C59 1.31(2) . ?
C2 C5 1.542(11) . ?
C2 H2A 0.9603 . ?
C2 H2B 0.9603 . ?
C2 H2C 0.9603 . ?
C3 C18 1.494(13) . ?
C4 C38 1.503(13) . ?
C4 C34 1.518(15) . ?
C4 C17 1.527(13) . ?
C4 C9 1.540(12) . ?
C5 C12 1.523(14) . ?
C5 C22 1.511(13) . ?
C6 C16 1.558(12) . ?
O36 C59 1.412(17) . ?
O36 C70 1.89(7) . ?
C7 C52 1.515(15) . ?
C8 C43 1.486(14) . ?
C8 C23 1.522(12) . ?
C8 C20 1.534(14) . ?
C10 C11 1.530(11) . ?
C10 H10A 0.9700 . ?
C10 H10B 0.9700 . ?
C11 H11A 0.9700 . ?
C11 H11B 0.9700 . ?
C12 H12A 0.9600 . ?
C12 H12B 0.9600 . ?
C12 H12C 0.9600 . ?
C13 C21 1.506(14) . ?
C13 C29 1.537(13) . ?
C13 C40 1.561(14) . ?
C14 C24 1.527(12) . ?
C15 C19 1.492(13) . ?
C15 H15A 0.9700 . ?
C15 H15B 0.9700 . ?
C16 C48 1.468(16) . ?
C16 C50 1.513(15) . ?
C16 C39 1.541(15) . ?
C17 H17A 0.9601 . ?
C17 H17B 0.9601 . ?
C17 H17C 0.9601 . ?
C18 C46 1.494(14) . ?
C18 C41 1.523(15) . ?
C18 C36 1.542(13) . ?
C19 H19A 0.9700 . ?
C19 H19B 0.9700 . ?
C20 H20A 0.9603 . ?
C20 H20B 0.9603 . ?
C20 H20C 0.9603 . ?
C21 H21A 0.9600 . ?
C21 H21B 0.9600 . ?
C21 H21C 0.9600 . ?
C22 H22A 0.9600 . ?
C22 H22B 0.9600 . ?
C22 H22C 0.9600 . ?
C23 H23A 0.9600 . ?
C23 H23B 0.9600 . ?
C23 H23C 0.9600 . ?
C24 C56 1.484(15) . ?
C24 C53 1.557(15) . ?
C24 C51 1.545(13) . ?
C25 C42 1.411(14) . ?
C25 H25 0.9300 . ?
C26 C45 1.470(15) . ?
C26 H26A 0.9700 . ?
C26 H26B 0.9700 . ?
C27 C33 1.565(17) . ?
C27 H27A 0.9605 . ?
C27 H27B 0.9605 . ?
C27 H27C 0.9605 . ?
C28 C52 1.518(17) . ?
C28 H28A 0.9602 . ?
C28 H28B 0.9602 . ?
C28 H28C 0.9602 . ?
C29 H29A 0.9600 . ?
C29 H29B 0.9600 . ?
C29 H29C 0.9600 . ?
C30 C35 1.516(14) . ?
C31 C55 1.524(18) . ?
C32 C33 1.533(14) . ?
C33 C47 1.513(15) . ?
C33 C44 1.534(17) . ?
C34 H34A 0.9600 . ?
C34 H34B 0.9600 . ?
C34 H34C 0.9600 . ?
C35 C62 1.544(17) . ?
C35 C58 1.526(17) . ?
C35 C60 1.499(17) . ?
C36 H36A 0.9611 . ?
C36 H36B 0.9611 . ?
C36 H36C 0.9611 . ?
C37 C49 1.522(14) . ?
C38 H38A 0.9600 . ?
C38 H38B 0.9600 . ?
C38 H38C 0.9600 . ?
C39 H39A 0.9600 . ?
C39 H39B 0.9600 . ?
C39 H39C 0.9600 . ?
C40 H40A 0.9602 . ?
C40 H40B 0.9602 . ?
C40 H40C 0.9602 . ?
C41 H41A 0.9600 . ?
C41 H41B 0.9600 . ?
C41 H41C 0.9600 . ?
C42 H42A 0.9700 . ?
C42 H42B 0.9700 . ?
C43 H43A 0.9600 . ?
C43 H43B 0.9600 . ?
C43 H43C 0.9600 . ?
C44 H44A 0.9600 . ?
C44 H44B 0.9600 . ?
C44 H44C 0.9600 . ?
C45 H45A 0.9700 . ?
C45 H45B 0.9700 . ?
C46 H46A 0.9600 . ?
C46 H46B 0.9600 . ?
C46 H46C 0.9600 . ?
C47 H47A 0.9600 . ?
C47 H47B 0.9600 . ?
C47 H47C 0.9600 . ?
C48 H48A 0.9601 . ?
C48 H48B 0.9601 . ?
C48 H48C 0.9601 . ?
C49 C63 1.419(19) . ?
C49 C64 1.474(19) . ?
C49 C67 1.60(2) . ?
C50 H50A 0.9600 . ?
C50 H50B 0.9600 . ?
C50 H50C 0.9600 . ?
C51 H51A 0.9600 . ?
C51 H51B 0.9600 . ?
C51 H51C 0.9600 . ?
C52 C65 1.54(3) . ?
C52 C66 1.48(3) . ?
C53 H53A 0.9600 . ?
C53 H53B 0.9600 . ?
C53 H53C 0.9600 . ?
C54 C55 1.55(2) . ?
C54 H54A 0.9600 . ?
C54 H54B 0.9600 . ?
C54 H54C 0.9600 . ?
C55 C61 1.51(2) . ?
C55 C57 1.505(18) . ?
C56 H56A 0.9600 . ?
C56 H56B 0.9600 . ?
C56 H56C 0.9600 . ?
C57 H57A 0.9600 . ?
C57 H57B 0.9600 . ?
C57 H57C 0.9600 . ?
C58 H58A 0.9600 . ?
C58 H58B 0.9600 . ?
C58 H58C 0.9600 . ?
C59 C68 1.59(3) . ?
C60 H60A 0.9644 . ?
C60 H60B 0.9647 . ?
C60 H60C 0.9641 . ?
C61 H61A 0.9600 . ?
C61 H61B 0.9600 . ?
C61 H61C 0.9600 . ?
C62 H62A 0.9601 . ?
C62 H62B 0.9601 . ?
C62 H62C 0.9602 . ?
C63 H63A 0.9602 . ?
C63 H63B 0.9602 . ?
C63 H63C 0.9602 . ?
C64 H64A 0.9601 . ?
C64 H64B 0.9601 . ?
C64 H64C 0.9601 . ?
C65 H65A 0.9600 . ?
C65 H65B 0.9600 . ?
C65 H65C 0.9600 . ?
C67 H67A 0.9602 . ?
C67 H67B 0.9603 . ?
C67 H67C 0.9602 . ?
C68 C73 1.51(4) . ?
C68 C76 1.65(5) . ?
C68 C75 1.87(5) . ?
O37 C69 1.35(4) . ?
C69 H69A 0.9619 . ?
C69 H69B 0.9614 . ?
C69 H69C 0.9616 . ?
C70 C71 1.45(7) . ?
C71 C74 1.476(15) . ?
C71 C78 1.98(2) . ?
C71 C72 1.76(7) . ?
C74 H74A 0.9613 . ?
C74 H74B 0.9613 . ?
C74 H74C 0.9613 . ?
C78 H78A 0.9631 . ?
C78 H78B 0.9644 . ?
C78 H78C 0.9663 . ?
 
loop_
 _geom_angle_atom_site_label_1
 _geom_angle_atom_site_label_2
 _geom_angle_atom_site_label_3
 _geom_angle
 _geom_angle_site_symmetry_1
 _geom_angle_site_symmetry_3
 _geom_angle_publ_flag
O8 Gd1 O4 147.36(19) . . ?
O8 Gd1 O11 131.99(19) . . ?
O4 Gd1 O11 77.9(2) . . ?
O8 Gd1 O13 76.81(19) . . ?
O4 Gd1 O13 105.1(2) . . ?
O11 Gd1 O13 74.5(2) . . ?
O8 Gd1 O5 80.46(19) . . ?
O4 Gd1 O5 77.35(19) . . ?
O11 Gd1 O5 143.21(19) . . ?
O13 Gd1 O5 138.6(2) . . ?
O8 Gd1 O2 78.75(18) . . ?
O4 Gd1 O2 127.36(19) . . ?
O11 Gd1 O2 77.2(2) . . ?
O13 Gd1 O2 111.7(2) . . ?
O5 Gd1 O2 97.0(2) . . ?
O8 Gd1 O1 68.97(18) . . ?
O4 Gd1 O1 80.95(18) . . ?
O11 Gd1 O1 131.8(2) . . ?
O13 Gd1 O1 70.0(2) . . ?
O5 Gd1 O1 69.7(2) . . ?
O2 Gd1 O1 146.52(18) . . ?
O8 Gd1 O3 121.17(18) . . ?
O4 Gd1 O3 76.62(19) . . ?
O11 Gd1 O3 70.8(2) . . ?
O13 Gd1 O3 144.13(19) . . ?
O5 Gd1 O3 77.22(19) . . ?
O2 Gd1 O3 51.53(18) . . ?
O1 Gd1 O3 143.3(2) . . ?
O8 Gd1 C1 102.1(2) . . ?
O4 Gd1 C1 101.7(2) . . ?
O11 Gd1 C1 68.6(2) . . ?
O13 Gd1 C1 127.9(2) . . ?
O5 Gd1 C1 90.4(2) . . ?
O2 Gd1 C1 25.70(19) . . ?
O1 Gd1 C1 159.0(2) . . ?
O3 Gd1 C1 26.3(2) . . ?
O8 Gd1 Co1 33.74(14) . . ?
O4 Gd1 Co1 116.53(14) . . ?
O11 Gd1 Co1 139.62(15) . . ?
O13 Gd1 Co1 65.42(13) . . ?
O5 Gd1 Co1 76.46(13) . . ?
O2 Gd1 Co1 112.49(12) . . ?
O1 Gd1 Co1 35.74(13) . . ?
O3 Gd1 Co1 146.70(13) . . ?
C1 Gd1 Co1 134.90(15) . . ?
O8 Gd1 Gd2 149.80(14) . . ?
O4 Gd1 Gd2 37.97(14) . . ?
O11 Gd1 Gd2 70.50(14) . . ?
O13 Gd1 Gd2 133.22(13) . . ?
O5 Gd1 Gd2 73.22(13) . . ?
O2 Gd1 Gd2 89.85(12) . . ?
O1 Gd1 Gd2 113.67(13) . . ?
O3 Gd1 Gd2 38.66(12) . . ?
C1 Gd1 Gd2 64.19(15) . . ?
Co1 Gd1 Gd2 144.21(3) . . ?
O8 Gd1 Gd3 75.64(13) . . ?
O4 Gd1 Gd3 72.28(13) . . ?
O11 Gd1 Gd3 148.71(14) . . ?
O13 Gd1 Gd3 103.98(15) . . ?
O5 Gd1 Gd3 36.20(14) . . ?
O2 Gd1 Gd3 129.33(15) . . ?
O1 Gd1 Gd3 33.98(15) . . ?
O3 Gd1 Gd3 110.38(14) . . ?
C1 Gd1 Gd3 126.57(17) . . ?
Co1 Gd1 Gd3 53.22(2) . . ?
Gd2 Gd1 Gd3 91.000(19) . . ?
O15 Gd2 O16 78.6(2) . . ?
O15 Gd2 O6 74.3(2) . . ?
O16 Gd2 O6 89.7(2) . . ?
O15 Gd2 O17 67.6(2) . . ?
O16 Gd2 O17 75.2(2) . . ?
O6 Gd2 O17 141.02(19) . . ?
O15 Gd2 O24 141.0(2) . . ?
O16 Gd2 O24 102.9(2) . . ?
O6 Gd2 O24 143.92(19) . . ?
O17 Gd2 O24 75.05(18) . . ?
O15 Gd2 O3 144.5(2) . . ?
O16 Gd2 O3 85.9(2) . . ?
O6 Gd2 O3 73.9(2) . . ?
O17 Gd2 O3 138.4(2) . . ?
O24 Gd2 O3 73.5(2) . . ?
O15 Gd2 O4 108.6(2) . . ?
O16 Gd2 O4 159.9(2) . . ?
O6 Gd2 O4 74.8(2) . . ?
O17 Gd2 O4 124.88(19) . . ?
O24 Gd2 O4 83.53(19) . . ?
O3 Gd2 O4 77.52(18) . . ?
O15 Gd2 O7 78.4(2) . . ?
O16 Gd2 O7 141.71(19) . . ?
O6 Gd2 O7 112.7(2) . . ?
O17 Gd2 O7 67.8(2) . . ?
O24 Gd2 O7 77.5(2) . . ?
O3 Gd2 O7 128.96(18) . . ?
O4 Gd2 O7 58.07(18) . . ?
O15 Gd2 P2 94.04(17) . . ?
O16 Gd2 P2 170.54(15) . . ?
O6 Gd2 P2 93.97(16) . . ?
O17 Gd2 P2 96.57(15) . . ?
O24 Gd2 P2 79.09(16) . . ?
O3 Gd2 P2 103.44(14) . . ?
O4 Gd2 P2 28.84(13) . . ?
O7 Gd2 P2 29.23(13) . . ?
O15 Gd2 Co2 33.29(16) . . ?
O16 Gd2 Co2 67.92(14) . . ?
O6 Gd2 Co2 105.69(14) . . ?
O17 Gd2 Co2 35.34(14) . . ?
O24 Gd2 Co2 110.39(13) . . ?
O3 Gd2 Co2 153.84(14) . . ?
O4 Gd2 Co2 128.20(12) . . ?
O7 Gd2 Co2 76.06(12) . . ?
P2 Gd2 Co2 102.68(5) . . ?
O15 Gd2 Gd1 134.81(17) . . ?
O16 Gd2 Gd1 127.53(14) . . ?
O6 Gd2 Gd1 70.33(14) . . ?
O17 Gd2 Gd1 146.15(13) . . ?
O24 Gd2 Gd1 75.31(13) . . ?
O3 Gd2 Gd1 42.45(14) . . ?
O4 Gd2 Gd1 35.07(12) . . ?
O7 Gd2 Gd1 90.07(12) . . ?
P2 Gd2 Gd1 61.93(4) . . ?
Co2 Gd2 Gd1 163.00(3) . . ?
O15 Gd2 Gd4 72.12(15) . . ?
O16 Gd2 Gd4 109.37(15) . . ?
O6 Gd2 Gd4 136.64(15) . . ?
O17 Gd2 Gd4 34.30(15) . . ?
O24 Gd2 Gd4 70.74(14) . . ?
O3 Gd2 Gd4 143.34(14) . . ?
O4 Gd2 Gd4 90.77(13) . . ?
O7 Gd2 Gd4 33.74(13) . . ?
P2 Gd2 Gd4 62.28(5) . . ?
Co2 Gd2 Gd4 52.64(2) . . ?
Gd1 Gd2 Gd4 118.447(15) . . ?
O30 Gd3 O19 73.8(2) . . ?
O30 Gd3 O18 87.7(2) . . ?
O19 Gd3 O18 76.7(2) . . ?
O30 Gd3 O1 140.0(2) . . ?
O19 Gd3 O1 67.4(2) . . ?
O18 Gd3 O1 74.5(2) . . ?
O30 Gd3 O9 145.2(2) . . ?
O19 Gd3 O9 140.9(2) . . ?
O18 Gd3 O9 102.0(2) . . ?
O1 Gd3 O9 74.51(19) . . ?
O30 Gd3 O14 82.5(2) . . ?
O19 Gd3 O14 115.1(2) . . ?
O18 Gd3 O14 161.5(2) . . ?
O1 Gd3 O14 122.50(19) . . ?
O9 Gd3 O14 78.1(2) . . ?
O30 Gd3 O5 111.9(2) . . ?
O19 Gd3 O5 76.27(19) . . ?
O18 Gd3 O5 140.1(2) . . ?
O1 Gd3 O5 68.3(2) . . ?
O9 Gd3 O5 81.74(18) . . ?
O14 Gd3 O5 58.37(19) . . ?
O30 Gd3 P1 97.71(19) . . ?
O19 Gd3 P1 95.69(16) . . ?
O18 Gd3 P1 169.08(17) . . ?
O1 Gd3 P1 95.44(15) . . ?
O9 Gd3 P1 78.86(15) . . ?
O14 Gd3 P1 29.40(14) . . ?
O5 Gd3 P1 28.97(14) . . ?
O30 Gd3 Co1 104.93(16) . . ?
O19 Gd3 Co1 33.14(16) . . ?
O18 Gd3 Co1 66.89(16) . . ?
O1 Gd3 Co1 35.15(13) . . ?
O9 Gd3 Co1 109.66(15) . . ?
O14 Gd3 Co1 130.85(14) . . ?
O5 Gd3 Co1 74.42(14) . . ?
P1 Gd3 Co1 102.45(5) . . ?
O30 Gd3 Gd5 71.55(16) . . ?
O19 Gd3 Gd5 136.07(16) . . ?
O18 Gd3 Gd5 127.21(16) . . ?
O1 Gd3 Gd5 146.76(12) . . ?
O9 Gd3 Gd5 76.12(15) . . ?
O14 Gd3 Gd5 34.49(14) . . ?
O5 Gd3 Gd5 92.46(14) . . ?
P1 Gd3 Gd5 63.68(5) . . ?
Co1 Gd3 Gd5 164.30(3) . . ?
O30 Gd3 Gd1 137.12(18) . . ?
O19 Gd3 Gd1 72.39(14) . . ?
O18 Gd3 Gd1 109.00(17) . . ?
O1 Gd3 Gd1 34.72(14) . . ?
O9 Gd3 Gd1 71.27(14) . . ?
O14 Gd3 Gd1 88.69(13) . . ?
O5 Gd3 Gd1 34.06(14) . . ?
P1 Gd3 Gd1 60.75(5) . . ?
Co1 Gd3 Gd1 52.63(3) . . ?
Gd5 Gd3 Gd1 119.31(2) . . ?
O32 Gd4 O29 124.1(2) . . ?
O32 Gd4 O26 76.1(2) . . ?
O29 Gd4 O26 76.1(3) . . ?
O32 Gd4 O20 74.9(2) . . ?
O29 Gd4 O20 72.9(2) . . ?
O26 Gd4 O20 112.8(2) . . ?
O32 Gd4 O7 82.3(2) . . ?
O29 Gd4 O7 145.4(2) . . ?
O26 Gd4 O7 91.7(2) . . ?
O20 Gd4 O7 140.6(2) . . ?
O32 Gd4 O17 67.9(2) . . ?
O29 Gd4 O17 137.4(2) . . ?
O26 Gd4 O17 140.9(2) . . ?
O20 Gd4 O17 72.2(2) . . ?
O7 Gd4 O17 69.5(2) . . ?
O32 Gd4 O22 140.9(2) . . ?
O29 Gd4 O22 80.6(2) . . ?
O26 Gd4 O22 142.9(2) . . ?
O20 Gd4 O22 86.8(2) . . ?
O7 Gd4 O22 91.4(2) . . ?
O17 Gd4 O22 73.8(2) . . ?
O32 Gd4 O28 142.2(2) . . ?
O29 Gd4 O28 74.1(2) . . ?
O26 Gd4 O28 77.6(2) . . ?
O20 Gd4 O28 141.3(2) . . ?
O7 Gd4 O28 71.75(19) . . ?
O17 Gd4 O28 124.01(19) . . ?
O22 Gd4 O28 68.4(2) . . ?
O32 Gd4 Co2 33.06(17) . . ?
O29 Gd4 Co2 136.63(16) . . ?
O26 Gd4 Co2 108.92(16) . . ?
O20 Gd4 Co2 65.43(16) . . ?
O7 Gd4 Co2 77.87(13) . . ?
O17 Gd4 Co2 35.35(13) . . ?
O22 Gd4 Co2 107.88(16) . . ?
O28 Gd4 Co2 149.15(14) . . ?
O32 Gd4 Gd2 74.22(16) . . ?
O29 Gd4 Gd2 158.63(18) . . ?
O26 Gd4 Gd2 122.37(17) . . ?
O20 Gd4 Gd2 105.39(17) . . ?
O7 Gd4 Gd2 36.46(14) . . ?
O17 Gd4 Gd2 33.28(14) . . ?
O22 Gd4 Gd2 78.03(16) . . ?
O28 Gd4 Gd2 98.09(14) . . ?
Co2 Gd4 Gd2 52.36(2) . . ?
O34 Gd5 O14 142.3(2) . . ?
O34 Gd5 O31 138.2(3) . . ?
O14 Gd5 O31 76.9(2) . . ?
O34 Gd5 O33 81.7(3) . . ?
O14 Gd5 O33 124.0(2) . . ?
O31 Gd5 O33 82.8(3) . . ?
O34 Gd5 O36 80.3(3) . . ?
O14 Gd5 O36 93.3(3) . . ?
O31 Gd5 O36 84.7(3) . . ?
O33 Gd5 O36 136.2(3) . . ?
O34 Gd5 O28 75.7(2) . . ?
O14 Gd5 O28 83.5(2) . . ?
O31 Gd5 O28 137.1(2) . . ?
O33 Gd5 O28 77.1(2) . . ?
O36 Gd5 O28 134.8(3) . . ?
O34 Gd5 O35 69.7(3) . . ?
O14 Gd5 O35 135.3(3) . . ?
O31 Gd5 O35 69.6(3) . . ?
O33 Gd5 O35 80.7(3) . . ?
O36 Gd5 O35 55.7(4) . . ?
O28 Gd5 O35 141.1(3) . . ?
O34 Gd5 O22 72.5(3) . . ?
O14 Gd5 O22 70.47(19) . . ?
O31 Gd5 O22 136.9(2) . . ?
O33 Gd5 O22 139.2(2) . . ?
O36 Gd5 O22 70.1(3) . . ?
O28 Gd5 O22 66.3(2) . . ?
O35 Gd5 O22 117.2(3) . . ?
O34 Gd5 O21 124.1(3) . . ?
O14 Gd5 O21 72.1(2) . . ?
O31 Gd5 O21 71.7(2) . . ?
O33 Gd5 O21 51.9(2) . . ?
O36 Gd5 O21 154.3(2) . . ?
O28 Gd5 O21 66.01(19) . . ?
O35 Gd5 O21 121.2(3) . . ?
O22 Gd5 O21 121.4(2) . . ?
O34 Gd5 C70 67.7(14) . . ?
O14 Gd5 C70 82.8(14) . . ?
O31 Gd5 C70 120.9(15) . . ?
O33 Gd5 C70 149.4(14) . . ?
O36 Gd5 C70 41.6(14) . . ?
O28 Gd5 C70 93.5(15) . . ?
O35 Gd5 C70 89.6(14) . . ?
O22 Gd5 C70 29.2(14) . . ?
O21 Gd5 C70 148.8(14) . . ?
O34 Gd5 C59 74.9(4) . . ?
O14 Gd5 C59 115.2(4) . . ?
O31 Gd5 C59 73.2(3) . . ?
O33 Gd5 C59 107.5(4) . . ?
O36 Gd5 C59 29.0(4) . . ?
O28 Gd5 C59 149.2(3) . . ?
O35 Gd5 C59 26.8(4) . . ?
O22 Gd5 C59 95.8(4) . . ?
O21 Gd5 C59 141.1(3) . . ?
C70 Gd5 C59 66.7(15) . . ?
O34 Gd5 C31 101.6(3) . . ?
O14 Gd5 C31 99.2(3) . . ?
O31 Gd5 C31 77.8(3) . . ?
O33 Gd5 C31 25.0(3) . . ?
O36 Gd5 C31 155.5(4) . . ?
O28 Gd5 C31 68.1(3) . . ?
O35 Gd5 C31 101.6(4) . . ?
O22 Gd5 C31 134.0(3) . . ?
O21 Gd5 C31 27.0(3) . . ?
C70 Gd5 C31 160.9(15) . . ?
C59 Gd5 C31 127.4(4) . . ?
O19 Co1 O8 92.6(3) . . ?
O19 Co1 O12 175.4(3) . . ?
O8 Co1 O12 92.0(3) . . ?
O19 Co1 N1 86.0(3) . . ?
O8 Co1 N1 86.7(3) . . ?
O12 Co1 N1 93.7(3) . . ?
O19 Co1 O10 91.0(3) . . ?
O8 Co1 O10 175.4(3) . . ?
O12 Co1 O10 84.4(3) . . ?
N1 Co1 O10 90.8(3) . . ?
O19 Co1 O1 87.3(2) . . ?
O8 Co1 O1 89.0(2) . . ?
O12 Co1 O1 93.3(3) . . ?
N1 Co1 O1 171.9(3) . . ?
O10 Co1 O1 93.9(2) . . ?
O19 Co1 Gd1 96.51(17) . . ?
O8 Co1 Gd1 42.49(14) . . ?
O12 Co1 Gd1 87.21(17) . . ?
N1 Co1 Gd1 129.1(2) . . ?
O10 Co1 Gd1 139.68(17) . . ?
O1 Co1 Gd1 47.27(18) . . ?
O19 Co1 Gd3 43.26(17) . . ?
O8 Co1 Gd3 99.42(16) . . ?
O12 Co1 Gd3 136.17(18) . . ?
N1 Co1 Gd3 128.9(2) . . ?
O10 Co1 Gd3 85.15(19) . . ?
O1 Co1 Gd3 45.27(18) . . ?
Gd1 Co1 Gd3 74.16(3) . . ?
O15 Co2 O32 92.3(3) . . ?
O15 Co2 N2 87.4(3) . . ?
O32 Co2 N2 87.3(3) . . ?
O15 Co2 O23 176.4(3) . . ?
O32 Co2 O23 90.2(3) . . ?
N2 Co2 O23 90.0(3) . . ?
O15 Co2 O27 91.9(3) . . ?
O32 Co2 O27 175.4(3) . . ?
N2 Co2 O27 90.9(3) . . ?
O23 Co2 O27 85.5(3) . . ?
O15 Co2 O17 87.3(2) . . ?
O32 Co2 O17 88.1(3) . . ?
N2 Co2 O17 172.9(3) . . ?
O23 Co2 O17 95.4(3) . . ?
O27 Co2 O17 94.1(3) . . ?
O15 Co2 Gd2 43.17(17) . . ?
O32 Co2 Gd2 99.37(18) . . ?
N2 Co2 Gd2 130.0(3) . . ?
O23 Co2 Gd2 138.9(2) . . ?
O27 Co2 Gd2 85.07(18) . . ?
O17 Co2 Gd2 45.65(18) . . ?
O15 Co2 Gd4 96.57(19) . . ?
O32 Co2 Gd4 41.63(19) . . ?
N2 Co2 Gd4 128.8(3) . . ?
O23 Co2 Gd4 87.1(2) . . ?
O27 Co2 Gd4 139.6(2) . . ?
O17 Co2 Gd4 47.27(18) . . ?
Gd2 Co2 Gd4 74.99(3) . . ?
O5 P1 O24 113.9(3) . . ?
O5 P1 O14 104.3(3) . . ?
O24 P1 O14 111.4(3) . . ?
O5 P1 C8 108.6(4) . . ?
O24 P1 C8 110.2(4) . . ?
O14 P1 C8 108.0(4) . . ?
O5 P1 Gd3 52.7(2) . . ?
O24 P1 Gd3 129.8(3) . . ?
O14 P1 Gd3 51.7(2) . . ?
C8 P1 Gd3 119.9(3) . . ?
O9 P2 O4 113.0(3) . . ?
O9 P2 O7 112.4(3) . . ?
O4 P2 O7 104.0(3) . . ?
O9 P2 C13 108.5(4) . . ?
O4 P2 C13 107.9(4) . . ?
O7 P2 C13 110.8(4) . . ?
O9 P2 Gd2 128.7(3) . . ?
O4 P2 Gd2 50.5(2) . . ?
O7 P2 Gd2 53.5(2) . . ?
C13 P2 Gd2 122.8(3) . . ?
Co1 O1 Gd3 99.6(2) . . ?
Co1 O1 Gd1 97.0(2) . . ?
Gd3 O1 Gd1 111.3(2) . . ?
C1 O2 Gd1 98.6(5) . . ?
C1 O3 Gd2 160.8(5) . . ?
C1 O3 Gd1 89.7(5) . . ?
Gd2 O3 Gd1 98.9(2) . . ?
P2 O4 Gd1 141.4(3) . . ?
P2 O4 Gd2 100.7(3) . . ?
Gd1 O4 Gd2 107.0(2) . . ?
P1 O5 Gd1 139.6(3) . . ?
P1 O5 Gd3 98.4(3) . . ?
Gd1 O5 Gd3 109.7(2) . . ?
C9 O6 Gd2 135.8(5) . . ?
P2 O7 Gd4 148.6(3) . . ?
P2 O7 Gd2 97.2(3) . . ?
Gd4 O7 Gd2 109.8(2) . . ?
C11 O8 Co1 110.6(5) . . ?
C11 O8 Gd1 138.9(5) . . ?
Co1 O8 Gd1 103.8(2) . . ?
P2 O9 Gd3 138.8(3) . . ?
C6 O10 Co1 127.1(6) . . ?
C9 O11 Gd1 137.3(6) . . ?
C3 O12 Co1 126.8(6) . . ?
C3 O13 Gd1 135.6(6) . . ?
P1 O14 Gd5 150.8(3) . . ?
P1 O14 Gd3 98.9(3) . . ?
Gd5 O14 Gd3 108.9(2) . . ?
C25 O15 Co2 112.1(6) . . ?
C25 O15 Gd2 135.0(6) . . ?
Co2 O15 Gd2 103.5(3) . . ?
C7 O16 Gd2 132.5(6) . . ?
Co2 O17 Gd2 99.0(3) . . ?
Co2 O17 Gd4 97.4(2) . . ?
Gd2 O17 Gd4 112.4(2) . . ?
C6 O18 Gd3 132.0(6) . . ?
C15 O19 Co1 113.2(5) . . ?
C15 O19 Gd3 139.6(5) . . ?
Co1 O19 Gd3 103.6(2) . . ?
C14 O20 Gd4 134.1(6) . . ?
C31 O21 Gd5 85.8(7) . . ?
C70 O22 Gd4 143(3) . . ?
C70 O22 Gd5 82(3) . . ?
Gd4 O22 Gd5 109.0(2) . . ?
C14 O23 Co2 125.8(6) . . ?
P1 O24 Gd2 135.7(3) . . ?
C30 O26 Gd4 132.4(6) . . ?
C7 O27 Co2 129.1(6) . . ?
Gd5 O28 Gd4 113.2(3) . . ?
C32 O29 Gd4 138.9(6) . . ?
C37 O30 Gd3 132.8(5) . . ?
C37 O31 Gd5 140.4(7) . . ?
C45 O32 Co2 112.4(6) . . ?
C45 O32 Gd4 142.2(6) . . ?
Co2 O32 Gd4 105.3(3) . . ?
C31 O33 Gd5 101.4(7) . . ?
C19 N1 C10 115.7(8) . . ?
C19 N1 Co1 106.0(5) . . ?
C10 N1 Co1 109.1(5) . . ?
C26 N2 C42 110.4(11) . . ?
C26 N2 Co2 107.1(6) . . ?
C42 N2 Co2 108.0(6) . . ?
O2 C1 O3 118.0(7) . . ?
O2 C1 C5 121.3(7) . . ?
O3 C1 C5 120.7(7) . . ?
O2 C1 Gd1 55.7(4) . . ?
O3 C1 Gd1 64.0(4) . . ?
C5 C1 Gd1 166.7(6) . . ?
C32 O34 Gd5 142.3(7) . . ?
C59 O35 Gd5 93.3(9) . . ?
C5 C2 H2A 109.4 . . ?
C5 C2 H2B 109.6 . . ?
H2A C2 H2B 109.4 . . ?
C5 C2 H2C 109.5 . . ?
H2A C2 H2C 109.4 . . ?
H2B C2 H2C 109.4 . . ?
O13 C3 O12 123.4(9) . . ?
O13 C3 C18 119.1(8) . . ?
O12 C3 C18 117.4(8) . . ?
C38 C4 C34 109.0(9) . . ?
C38 C4 C17 109.1(8) . . ?
C34 C4 C17 110.9(9) . . ?
C38 C4 C9 109.4(7) . . ?
C34 C4 C9 107.3(8) . . ?
C17 C4 C9 111.2(8) . . ?
C1 C5 C12 108.2(8) . . ?
C1 C5 C22 111.3(7) . . ?
C12 C5 C22 110.7(8) . . ?
C1 C5 C2 107.1(7) . . ?
C12 C5 C2 111.6(8) . . ?
C22 C5 C2 107.8(8) . . ?
O18 C6 O10 127.6(8) . . ?
O18 C6 C16 117.1(8) . . ?
O10 C6 C16 115.2(8) . . ?
C59 O36 C70 144(2) . . ?
C59 O36 Gd5 95.1(10) . . ?
C70 O36 Gd5 80(2) . . ?
O16 C7 O27 124.8(9) . . ?
O16 C7 C52 121.9(9) . . ?
O27 C7 C52 113.3(8) . . ?
C43 C8 C23 110.7(8) . . ?
C43 C8 C20 109.3(9) . . ?
C23 C8 C20 109.5(8) . . ?
C43 C8 P1 110.8(7) . . ?
C23 C8 P1 110.0(7) . . ?
C20 C8 P1 106.5(6) . . ?
O6 C9 O11 125.6(8) . . ?
O6 C9 C4 117.6(7) . . ?
O11 C9 C4 116.8(7) . . ?
N1 C10 C11 107.4(7) . . ?
N1 C10 H10A 110.3 . . ?
C11 C10 H10A 110.4 . . ?
N1 C10 H10B 110.2 . . ?
C11 C10 H10B 110.1 . . ?
H10A C10 H10B 108.5 . . ?
O8 C11 C10 105.9(7) . . ?
O8 C11 H11A 110.6 . . ?
C10 C11 H11A 110.6 . . ?
O8 C11 H11B 110.5 . . ?
C10 C11 H11B 110.5 . . ?
H11A C11 H11B 108.8 . . ?
C5 C12 H12A 109.5 . . ?
C5 C12 H12B 109.5 . . ?
H12A C12 H12B 109.5 . . ?
C5 C12 H12C 109.4 . . ?
H12A C12 H12C 109.5 . . ?
H12B C12 H12C 109.5 . . ?
C21 C13 C29 108.6(9) . . ?
C21 C13 C40 108.2(9) . . ?
C29 C13 C40 110.9(9) . . ?
C21 C13 P2 111.2(8) . . ?
C29 C13 P2 109.4(7) . . ?
C40 C13 P2 108.6(7) . . ?
O20 C14 O23 125.9(9) . . ?
O20 C14 C24 118.3(9) . . ?
O23 C14 C24 115.8(8) . . ?
O19 C15 C19 110.2(8) . . ?
O19 C15 H15A 109.6 . . ?
C19 C15 H15A 109.6 . . ?
O19 C15 H15B 109.6 . . ?
C19 C15 H15B 109.6 . . ?
H15A C15 H15B 108.2 . . ?
C48 C16 C50 110.5(11) . . ?
C48 C16 C6 109.3(9) . . ?
C50 C16 C6 107.3(8) . . ?
C48 C16 C39 109.2(9) . . ?
C50 C16 C39 110.8(11) . . ?
C6 C16 C39 109.7(8) . . ?
C4 C17 H17A 109.8 . . ?
C4 C17 H17B 109.5 . . ?
H17A C17 H17B 109.5 . . ?
C4 C17 H17C 109.2 . . ?
H17A C17 H17C 109.5 . . ?
H17B C17 H17C 109.5 . . ?
C3 C18 C46 109.6(8) . . ?
C3 C18 C41 106.0(8) . . ?
C46 C18 C41 111.3(9) . . ?
C3 C18 C36 110.5(7) . . ?
C46 C18 C36 111.1(9) . . ?
C41 C18 C36 108.2(8) . . ?
N1 C19 C15 107.3(7) . . ?
N1 C19 H19A 110.2 . . ?
C15 C19 H19A 110.3 . . ?
N1 C19 H19B 110.2 . . ?
C15 C19 H19B 110.3 . . ?
H19A C19 H19B 108.5 . . ?
C8 C20 H20A 109.5 . . ?
C8 C20 H20B 109.5 . . ?
H20A C20 H20B 109.4 . . ?
C8 C20 H20C 109.4 . . ?
H20A C20 H20C 109.4 . . ?
H20B C20 H20C 109.4 . . ?
C13 C21 H21A 109.4 . . ?
C13 C21 H21B 109.4 . . ?
H21A C21 H21B 109.5 . . ?
C13 C21 H21C 109.6 . . ?
H21A C21 H21C 109.5 . . ?
H21B C21 H21C 109.5 . . ?
C5 C22 H22A 109.2 . . ?
C5 C22 H22B 109.6 . . ?
H22A C22 H22B 109.5 . . ?
C5 C22 H22C 109.6 . . ?
H22A C22 H22C 109.5 . . ?
H22B C22 H22C 109.5 . . ?
C8 C23 H23A 109.5 . . ?
C8 C23 H23B 109.4 . . ?
H23A C23 H23B 109.5 . . ?
C8 C23 H23C 109.5 . . ?
H23A C23 H23C 109.5 . . ?
H23B C23 H23C 109.5 . . ?
C56 C24 C14 111.5(8) . . ?
C56 C24 C53 109.8(10) . . ?
C14 C24 C53 107.3(8) . . ?
C56 C24 C51 109.5(8) . . ?
C14 C24 C51 108.9(8) . . ?
C53 C24 C51 109.7(9) . . ?
O15 C25 C42 113.5(10) . . ?
O15 C25 H25 123.0 . . ?
C42 C25 H25 123.4 . . ?
N2 C26 C45 108.8(8) . . ?
N2 C26 H26A 109.8 . . ?
C45 C26 H26A 109.8 . . ?
N2 C26 H26B 109.9 . . ?
C45 C26 H26B 110.2 . . ?
H26A C26 H26B 108.4 . . ?
C33 C27 H27A 109.5 . . ?
C33 C27 H27B 109.4 . . ?
H27A C27 H27B 109.4 . . ?
C33 C27 H27C 109.6 . . ?
H27A C27 H27C 109.4 . . ?
H27B C27 H27C 109.4 . . ?
C52 C28 H28A 109.5 . . ?
C52 C28 H28B 109.7 . . ?
H28A C28 H28B 109.5 . . ?
C52 C28 H28C 109.2 . . ?
H28A C28 H28C 109.5 . . ?
H28B C28 H28C 109.4 . . ?
C13 C29 H29A 109.4 . . ?
C13 C29 H29B 109.4 . . ?
H29A C29 H29B 109.5 . . ?
C13 C29 H29C 109.6 . . ?
H29A C29 H29C 109.5 . . ?
H29B C29 H29C 109.5 . . ?
O25 C30 O26 124.4(9) . . ?
O25 C30 C35 118.0(9) . . ?
O26 C30 C35 117.5(9) . . ?
O33 C31 O21 120.3(10) . . ?
O33 C31 C55 122.9(11) . . ?
O21 C31 C55 116.7(12) . . ?
O33 C31 Gd5 53.6(6) . . ?
O21 C31 Gd5 67.1(6) . . ?
C55 C31 Gd5 172.1(8) . . ?
O29 C32 O34 125.1(9) . . ?
O29 C32 C33 120.9(9) . . ?
O34 C32 C33 114.0(10) . . ?
C47 C33 C32 110.2(9) . . ?
C47 C33 C44 109.7(10) . . ?
C32 C33 C44 105.4(10) . . ?
C47 C33 C27 110.2(11) . . ?
C32 C33 C27 112.3(9) . . ?
C44 C33 C27 109.0(10) . . ?
C4 C34 H34A 109.6 . . ?
C4 C34 H34B 109.4 . . ?
H34A C34 H34B 109.5 . . ?
C4 C34 H34C 109.4 . . ?
H34A C34 H34C 109.5 . . ?
H34B C34 H34C 109.5 . . ?
C30 C35 C62 107.3(10) . . ?
C30 C35 C58 109.5(10) . . ?
C62 C35 C58 107.3(11) . . ?
C30 C35 C60 111.1(9) . . ?
C62 C35 C60 111.5(13) . . ?
C58 C35 C60 110.0(12) . . ?
C18 C36 H36A 109.7 . . ?
C18 C36 H36B 109.7 . . ?
H36A C36 H36B 109.4 . . ?
C18 C36 H36C 109.3 . . ?
H36A C36 H36C 109.4 . . ?
H36B C36 H36C 109.3 . . ?
O31 C37 O30 125.4(9) . . ?
O31 C37 C49 118.0(11) . . ?
O30 C37 C49 116.5(9) . . ?
C4 C38 H38A 109.5 . . ?
C4 C38 H38B 109.5 . . ?
H38A C38 H38B 109.5 . . ?
C4 C38 H38C 109.5 . . ?
H38A C38 H38C 109.5 . . ?
H38B C38 H38C 109.5 . . ?
C16 C39 H39A 109.7 . . ?
C16 C39 H39B 109.4 . . ?
H39A C39 H39B 109.5 . . ?
C16 C39 H39C 109.3 . . ?
H39A C39 H39C 109.5 . . ?
H39B C39 H39C 109.5 . . ?
C13 C40 H40A 109.6 . . ?
C13 C40 H40B 109.3 . . ?
H40A C40 H40B 109.4 . . ?
C13 C40 H40C 109.6 . . ?
H40A C40 H40C 109.4 . . ?
H40B C40 H40C 109.5 . . ?
C18 C41 H41A 109.5 . . ?
C18 C41 H41B 109.7 . . ?
H41A C41 H41B 109.5 . . ?
C18 C41 H41C 109.2 . . ?
H41A C41 H41C 109.5 . . ?
H41B C41 H41C 109.5 . . ?
C25 C42 N2 113.2(10) . . ?
C25 C42 H42A 109.4 . . ?
N2 C42 H42A 109.4 . . ?
C25 C42 H42B 108.3 . . ?
N2 C42 H42B 108.6 . . ?
H42A C42 H42B 107.9 . . ?
C8 C43 H43A 109.4 . . ?
C8 C43 H43B 109.5 . . ?
H43A C43 H43B 109.5 . . ?
C8 C43 H43C 109.4 . . ?
H43A C43 H43C 109.5 . . ?
H43B C43 H43C 109.5 . . ?
C33 C44 H44A 109.4 . . ?
C33 C44 H44B 109.4 . . ?
H44A C44 H44B 109.5 . . ?
C33 C44 H44C 109.6 . . ?
H44A C44 H44C 109.5 . . ?
H44B C44 H44C 109.5 . . ?
O32 C45 C26 110.1(10) . . ?
O32 C45 H45A 109.5 . . ?
C26 C45 H45A 109.5 . . ?
O32 C45 H45B 109.6 . . ?
C26 C45 H45B 109.9 . . ?
H45A C45 H45B 108.2 . . ?
C18 C46 H46A 109.2 . . ?
C18 C46 H46B 109.5 . . ?
H46A C46 H46B 109.5 . . ?
C18 C46 H46C 109.7 . . ?
H46A C46 H46C 109.5 . . ?
H46B C46 H46C 109.5 . . ?
C33 C47 H47A 109.2 . . ?
C33 C47 H47B 109.5 . . ?
H47A C47 H47B 109.5 . . ?
C33 C47 H47C 109.7 . . ?
H47A C47 H47C 109.5 . . ?
H47B C47 H47C 109.5 . . ?
C16 C48 H48A 109.7 . . ?
C16 C48 H48B 109.4 . . ?
H48A C48 H48B 109.5 . . ?
C16 C48 H48C 109.3 . . ?
H48A C48 H48C 109.5 . . ?
H48B C48 H48C 109.5 . . ?
C63 C49 C64 117.2(14) . . ?
C63 C49 C37 114.6(12) . . ?
C64 C49 C37 110.7(10) . . ?
C63 C49 C67 103.1(15) . . ?
C64 C49 C67 107.3(17) . . ?
C37 C49 C67 102.1(11) . . ?
C16 C50 H50A 109.3 . . ?
C16 C50 H50B 109.5 . . ?
H50A C50 H50B 109.5 . . ?
C16 C50 H50C 109.6 . . ?
H50A C50 H50C 109.5 . . ?
H50B C50 H50C 109.5 . . ?
C24 C51 H51A 109.6 . . ?
C24 C51 H51B 109.6 . . ?
H51A C51 H51B 109.5 . . ?
C24 C51 H51C 109.2 . . ?
H51A C51 H51C 109.5 . . ?
H51B C51 H51C 109.5 . . ?
C7 C52 C65 108.4(11) . . ?
C7 C52 C28 111.5(9) . . ?
C65 C52 C28 106.7(17) . . ?
C7 C52 C66 108.2(14) . . ?
C65 C52 C66 112(2) . . ?
C28 C52 C66 109.9(14) . . ?
C24 C53 H53A 109.7 . . ?
C24 C53 H53B 109.2 . . ?
H53A C53 H53B 109.5 . . ?
C24 C53 H53C 109.5 . . ?
H53A C53 H53C 109.5 . . ?
H53B C53 H53C 109.5 . . ?
C55 C54 H54A 109.4 . . ?
C55 C54 H54B 109.4 . . ?
H54A C54 H54B 109.5 . . ?
C55 C54 H54C 109.6 . . ?
H54A C54 H54C 109.5 . . ?
H54B C54 H54C 109.5 . . ?
C31 C55 C61 109.6(13) . . ?
C31 C55 C57 109.6(12) . . ?
C61 C55 C57 108.9(15) . . ?
C31 C55 C54 106.4(13) . . ?
C61 C55 C54 111.2(15) . . ?
C57 C55 C54 111.2(14) . . ?
C24 C56 H56A 109.6 . . ?
C24 C56 H56B 109.5 . . ?
H56A C56 H56B 109.5 . . ?
C24 C56 H56C 109.3 . . ?
H56A C56 H56C 109.5 . . ?
H56B C56 H56C 109.5 . . ?
C55 C57 H57A 109.3 . . ?
C55 C57 H57B 109.5 . . ?
H57A C57 H57B 109.5 . . ?
C55 C57 H57C 109.6 . . ?
H57A C57 H57C 109.5 . . ?
H57B C57 H57C 109.5 . . ?
C35 C58 H58A 109.6 . . ?
C35 C58 H58B 109.4 . . ?
H58A C58 H58B 109.5 . . ?
C35 C58 H58C 109.5 . . ?
H58A C58 H58C 109.5 . . ?
H58B C58 H58C 109.5 . . ?
O35 C59 O36 115.3(15) . . ?
O35 C59 C68 124.3(18) . . ?
O36 C59 C68 120(2) . . ?
O35 C59 Gd5 59.9(8) . . ?
O36 C59 Gd5 55.9(8) . . ?
C68 C59 Gd5 175.6(16) . . ?
C35 C60 H60A 109.9 . . ?
C35 C60 H60B 110.5 . . ?
H60A C60 H60B 109.1 . . ?
C35 C60 H60C 109.3 . . ?
H60A C60 H60C 109.1 . . ?
H60B C60 H60C 108.9 . . ?
C55 C61 H61A 109.5 . . ?
C55 C61 H61B 109.6 . . ?
H61A C61 H61B 109.5 . . ?
C55 C61 H61C 109.3 . . ?
H61A C61 H61C 109.5 . . ?
H61B C61 H61C 109.5 . . ?
C35 C62 H62A 109.5 . . ?
C35 C62 H62B 109.3 . . ?
H62A C62 H62B 109.5 . . ?
C35 C62 H62C 109.7 . . ?
H62A C62 H62C 109.5 . . ?
H62B C62 H62C 109.5 . . ?
C49 C63 H63A 109.7 . . ?
C49 C63 H63B 109.1 . . ?
H63A C63 H63B 109.4 . . ?
C49 C63 H63C 109.6 . . ?
H63A C63 H63C 109.5 . . ?
H63B C63 H63C 109.5 . . ?
C49 C64 H64A 109.6 . . ?
C49 C64 H64B 109.5 . . ?
H64A C64 H64B 109.5 . . ?
C49 C64 H64C 109.3 . . ?
H64A C64 H64C 109.5 . . ?
H64B C64 H64C 109.5 . . ?
C52 C65 H65A 109.3 . . ?
C52 C65 H65B 109.5 . . ?
H65A C65 H65B 109.5 . . ?
C52 C65 H65C 109.6 . . ?
H65A C65 H65C 109.5 . . ?
H65B C65 H65C 109.5 . . ?
H66A C66 H66B 108.1 . . ?
C52 C66 H66C 109.9 . . ?
H66B C66 H66C 108.3 . . ?
C49 C67 H67A 109.3 . . ?
C49 C67 H67B 109.7 . . ?
H67A C67 H67B 109.5 . . ?
C49 C67 H67C 109.6 . . ?
H67A C67 H67C 109.4 . . ?
H67B C67 H67C 109.4 . . ?
C73 C68 C59 116(2) . . ?
C59 C68 C76 101(2) . . ?
C73 C68 C75 109(3) . . ?
C59 C68 C75 92(2) . . ?
C76 C68 C75 166(3) . . ?
O37 C69 H69B 108.2 . . ?
H69A C69 H69B 109.1 . . ?
O37 C69 H69C 109.7 . . ?
H69A C69 H69C 109.4 . . ?
H69B C69 H69C 109.4 . . ?
O22 C70 C71 132(5) . . ?
O22 C70 O36 125(5) . . ?
C71 C70 O36 102(4) . . ?
O22 C70 Gd5 69(3) . . ?
C71 C70 Gd5 158(4) . . ?
O36 C70 Gd5 57.9(19) . . ?
C74 C71 C70 110(3) . . ?
C74 C71 C78 107.2(10) . . ?
C70 C71 C78 104(3) . . ?
C74 C71 C72 113(2) . . ?
C70 C71 C72 115(3) . . ?
C78 C71 C72 106(2) . . ?
C71 C74 H74A 109.6 . . ?
C71 C74 H74B 109.7 . . ?
H74A C74 H74B 109.3 . . ?
C71 C74 H74C 109.5 . . ?
H74A C74 H74C 109.3 . . ?
H74B C74 H74C 109.3 . . ?
C71 C78 H78B 109.5 . . ?
H78A C78 H78B 109.4 . . ?
H78B C78 H78C 109.3 . . ?
 
_refine_diff_density_max    3.685
_refine_diff_density_min   -1.761
_refine_diff_density_rms    0.293

_shelx_res_file
;

    trya_a_sq.res created by SHELXL-2014/7

TITL tryA_a.res in P2(1)/n
CELL  0.71073  12.8258  30.3995  28.8855   90.000   93.113   90.000
ZERR   79.000   0.0034   0.0074   0.0079    0.000    0.016    0.000
LATT 1
SYMM 1/2-X, 1/2+Y, 1/2-Z
SFAC C  H  Co Gd N  O  P
UNIT 79  79  79  79  79  79  79
L.S. 2
ACTA
BOND $H
FMAP 2
PLAN 5
FREE Gd3  O21
FREE C73  C76
DFIX 1.54 C25A C8H C2' C5' C25A C9H
DFIX 1.54 C2' C4H C2' C5J C4' C2'
TEMP 23.000
WGHT    0.100000    0.476390
FVAR       0.09912   0.85445   0.44060
GD1   4    0.476442    0.398451    0.570762    11.00000    0.01946    0.01539 =
         0.02327    0.00156    0.00421    0.00215
GD2   4    0.578816    0.290767    0.623700    11.00000    0.02190    0.01684 =
         0.02257    0.00144    0.00318    0.00207
GD3   4    0.404547    0.442229    0.694859    11.00000    0.02527    0.01825 =
         0.02877   -0.00018    0.00937    0.00198
GD4   4    0.497144    0.258611    0.751498    11.00000    0.02925    0.02843 =
         0.02684    0.00697    0.00803    0.00649
GD5   4    0.527864    0.385099    0.806330    11.00000    0.04092    0.02918 =
         0.02493   -0.00115    0.01008   -0.00362
CO1   3    0.368081    0.493328    0.593995    11.00000    0.02287    0.01696 =
         0.03073    0.00065    0.00481    0.00343
CO2   3    0.592971    0.193243    0.672997    11.00000    0.03685    0.01942 =
         0.03134    0.00619    0.00847    0.00541
P1    7    0.616631    0.394834    0.684534    11.00000    0.02034    0.01945 =
         0.02265    0.00025    0.00367    0.00021
P2    7    0.367411    0.327502    0.656421    11.00000    0.01974    0.01897 =
         0.02988    0.00311    0.00474   -0.00040
O1    6    0.345220    0.434063    0.615577    11.00000    0.02839    0.01783 =
         0.02902    0.00003    0.00362    0.00638
O2    6    0.637106    0.406942    0.531201    11.00000    0.02519    0.01849 =
         0.03602    0.00717    0.01429    0.00759
O3    6    0.644311    0.350042    0.577923    11.00000    0.01637    0.01913 =
         0.03636    0.00092    0.00217   -0.00081
O4    6    0.426170    0.339142    0.613193    11.00000    0.02154    0.01381 =
         0.02487    0.00199    0.00565   -0.00087
O5    6    0.546388    0.415258    0.646225    11.00000    0.01819    0.02045 =
         0.03051   -0.00148    0.00187   -0.00092
O6    6    0.512913    0.278296    0.546937    11.00000    0.02746    0.02682 =
         0.02594   -0.00117    0.00013   -0.00169
O7    6    0.436558    0.292442    0.681226    11.00000    0.02256    0.02122 =
         0.02010    0.00276    0.00662   -0.00158
O8    6    0.486611    0.473284    0.564794    11.00000    0.01615    0.01459 =
         0.02080    0.00497    0.00661    0.00025
O9    6    0.348874    0.366990    0.687017    11.00000    0.02549    0.01765 =
         0.03312    0.00322    0.01254   -0.00291
O10   6    0.243029    0.516085    0.619299    11.00000    0.02136    0.02347 =
         0.03233   -0.00349    0.00608    0.00171
O11   6    0.464170    0.343278    0.515180    11.00000    0.02427    0.02533 =
         0.02009   -0.00162    0.00109    0.00148
O12   6    0.281504    0.485296    0.539118    11.00000    0.02440    0.02416 =
         0.03046    0.00019   -0.00448    0.00393
O13   6    0.328061    0.416519    0.521842    11.00000    0.02033    0.02249 =
         0.03121    0.00457   -0.00159    0.00725
O14   6    0.557434    0.402193    0.729014    11.00000    0.02892    0.01760 =
         0.02554    0.00140    0.00631    0.00130
O15   6    0.522250    0.218441    0.621822    11.00000    0.05253    0.01331 =
         0.02255   -0.00044    0.00244   -0.00440
O16   6    0.733039    0.253359    0.607328    11.00000    0.03430    0.02250 =
         0.03695    0.00520    0.01749    0.01458
O17   6    0.627710    0.252087    0.693236    11.00000    0.03424    0.01721 =
         0.02724    0.00548    0.00639    0.00181
O18   6    0.244429    0.480534    0.687374    11.00000    0.03276    0.03035 =
         0.03977    0.00611    0.01221    0.00947
O19   6    0.443750    0.503283    0.649901    11.00000    0.02999    0.01505 =
         0.03577    0.00008    0.00961    0.00124
O20   6    0.628140    0.209956    0.780721    11.00000    0.04086    0.02130 =
         0.03677    0.00702    0.00152    0.00451
O21   6    0.352331    0.418752    0.767794    11.00000    0.04381    0.02856 =
         0.03279    0.00262    0.01795    0.00180
O22   6    0.624006    0.318349    0.767698    11.00000    0.03227    0.02839 =
         0.04648    0.00028    0.01448   -0.00589
O23   6    0.668681    0.164630    0.722892    11.00000    0.03682    0.03006 =
         0.03728    0.01316    0.01208    0.00874
O24   6    0.639674    0.346248    0.677119    11.00000    0.03074    0.01786 =
         0.02142    0.00147   -0.00353    0.00044
O25   6    0.257115    0.289681    0.805108    11.00000    0.04084    0.04188 =
         0.04411    0.00340    0.01319    0.00516
O26   6    0.329729    0.235082    0.766441    11.00000    0.03956    0.03357 =
         0.03674    0.00102    0.00641   -0.00133
O27   6    0.716832    0.186146    0.640068    11.00000    0.05250    0.02969 =
         0.03575    0.01289    0.01706    0.01007
O28   6    0.407545    0.329682    0.770925    11.00000    0.03037    0.02729 =
         0.02773   -0.00371    0.00017    0.00266
O29   6    0.494646    0.260539    0.831931    11.00000    0.05290    0.03541 =
         0.02822    0.00005    0.00826    0.00298
O30   6    0.463676    0.496531    0.746583    11.00000    0.05868    0.02614 =
         0.02097   -0.00597    0.00331    0.00114
O31   6    0.542213    0.462077    0.807334    11.00000    0.05804    0.03231 =
         0.03119   -0.00470    0.00618   -0.00440
O32   6    0.475435    0.196405    0.708301    11.00000    0.04155    0.01981 =
         0.04642    0.00662    0.01422    0.00400
O33   6    0.369732    0.399811    0.841881    11.00000    0.04795    0.05121 =
         0.03344    0.00155    0.00959    0.00463
N1    5    0.409809    0.551694    0.577097    11.00000    0.02913    0.01545 =
         0.03673    0.00195    0.01093    0.00140
N2    5    0.541604    0.137681    0.651006    11.00000    0.05942    0.02778 =
         0.03539    0.00201    0.01790    0.00330
C1    1    0.681050    0.371043    0.543756    11.00000    0.01832    0.02077 =
         0.02147    0.00170    0.00310    0.00211
O34   6    0.533570    0.328345    0.858163    11.00000    0.06529    0.05837 =
         0.03109    0.00964   -0.00703   -0.02277
O35   6    0.600682    0.411060    0.884180    11.00000    0.08754    0.05749 =
         0.03842   -0.00742    0.00427   -0.00812
C2    1    0.744364    0.307015    0.501473    11.00000    0.02566    0.02292 =
         0.03908   -0.00461    0.01117    0.00795
AFIX 137
H2A   2    0.734635    0.287857    0.527304    11.00000   -1.50000
H2B   2    0.799223    0.295731    0.483510    11.00000   -1.50000
H2C   2    0.680754    0.308598    0.482436    11.00000   -1.50000
AFIX   0
C3    1    0.269291    0.450098    0.515930    11.00000    0.02159    0.02456 =
         0.03542    0.00134    0.01320   -0.00184
C4    1    0.441420    0.278667    0.468263    11.00000    0.03577    0.03003 =
         0.02074   -0.00366   -0.00026   -0.00604
C5    1    0.774052    0.353373    0.519416    11.00000    0.02417    0.02321 =
         0.03647    0.00250    0.01403    0.00248
C6    1    0.209539    0.507913    0.658251    11.00000    0.02183    0.02401 =
         0.03775   -0.00831    0.01322   -0.00394
O36   6    0.711333    0.386266    0.829663    10.95144    0.05495    0.06972 =
         0.07762    0.02984    0.01213   -0.00205
C7    1    0.764665    0.214443    0.615726    11.00000    0.04140    0.03448 =
         0.02672    0.00962    0.01095    0.01498
C8    1    0.737409    0.425914    0.689908    11.00000    0.02320    0.02772 =
         0.03049   -0.00702   -0.00044   -0.00369
C9    1    0.477423    0.302009    0.513689    11.00000    0.02814    0.01795 =
         0.02853    0.00299    0.00058    0.00304
C10   1    0.506579    0.548856    0.549849    11.00000    0.02589    0.02122 =
         0.03775   -0.00134    0.01337   -0.00273
AFIX  23
H10A  2    0.550870    0.574249    0.556202    11.00000   -1.20000
H10B  2    0.487757    0.548063    0.516878    11.00000   -1.20000
AFIX   0
C11   1    0.564032    0.506658    0.564754    11.00000    0.02693    0.01771 =
         0.03238    0.00067    0.00810   -0.00130
AFIX  23
H11A  2    0.616804    0.499435    0.543169    11.00000   -1.20000
H11B  2    0.597618    0.510056    0.595449    11.00000   -1.20000
AFIX   0
C12   1    0.867428    0.352039    0.554282    11.00000    0.01470    0.05999 =
         0.03722   -0.00812    0.00129    0.00565
AFIX 137
H12A  2    0.885582    0.381454    0.563744    11.00000   -1.50000
H12B  2    0.925657    0.338645    0.540217    11.00000   -1.50000
H12C  2    0.849906    0.335177    0.580865    11.00000   -1.50000
AFIX   0
C13   1    0.243705    0.304931    0.637587    11.00000    0.02156    0.03520 =
         0.04229    0.00216    0.00642   -0.00392
C14   1    0.670490    0.176074    0.764998    11.00000    0.02509    0.02370 =
         0.04460    0.01242    0.00102   -0.01053
C15   1    0.477129    0.548142    0.655707    11.00000    0.03998    0.02082 =
         0.03562   -0.00056    0.01045    0.00266
AFIX  23
H15A  2    0.551730    0.550120    0.652088    11.00000   -1.20000
H15B  2    0.463261    0.558107    0.686676    11.00000   -1.20000
AFIX   0
C16   1    0.115129    0.536474    0.671879    11.00000    0.02877    0.03320 =
         0.04528   -0.00263    0.01193    0.01100
C17   1    0.506634    0.237598    0.460397    11.00000    0.09478    0.02696 =
         0.02561   -0.00887   -0.00928    0.00737
AFIX 137
H17A  2    0.479842    0.222740    0.432938    11.00000   -1.50000
H17B  2    0.503159    0.218298    0.486573    11.00000   -1.50000
H17C  2    0.577911    0.245931    0.456732    11.00000   -1.50000
AFIX   0
C18   1    0.175888    0.447181    0.482820    11.00000    0.01275    0.03570 =
         0.03769   -0.00322   -0.00416    0.00308
C19   1    0.420719    0.576812    0.620725    11.00000    0.03832    0.02066 =
         0.03291   -0.00758    0.01338    0.00120
AFIX  23
H19A  2    0.352496    0.584643    0.631114    11.00000   -1.20000
H19B  2    0.459887    0.603626    0.616214    11.00000   -1.20000
AFIX   0
C20   1    0.784974    0.424099    0.642365    11.00000    0.02652    0.06101 =
         0.05514   -0.01826    0.01964   -0.02266
AFIX 137
H20A  2    0.849597    0.440099    0.643592    11.00000   -1.50000
H20B  2    0.737365    0.437044    0.619460    11.00000   -1.50000
H20C  2    0.797734    0.394019    0.634284    11.00000   -1.50000
AFIX   0
C21   1    0.182613    0.291097    0.678212    11.00000    0.02957    0.06972 =
         0.05650    0.01737   -0.00189   -0.02812
AFIX 137
H21A  2    0.172208    0.316053    0.697796    11.00000   -1.50000
H21B  2    0.220590    0.268794    0.695563    11.00000   -1.50000
H21C  2    0.116095    0.279623    0.667176    11.00000   -1.50000
AFIX   0
C22   1    0.797698    0.381368    0.478057    11.00000    0.03418    0.03651 =
         0.05696    0.00961    0.02470    0.00272
AFIX 137
H22A  2    0.740917    0.379367    0.455093    11.00000   -1.50000
H22B  2    0.860658    0.371095    0.465138    11.00000   -1.50000
H22C  2    0.806544    0.411431    0.487662    11.00000   -1.50000
AFIX   0
C23   1    0.714701    0.473523    0.702174    11.00000    0.04098    0.02712 =
         0.05036   -0.00702    0.00711   -0.01527
AFIX 137
H23A  2    0.680129    0.474505    0.730811    11.00000   -1.50000
H23B  2    0.670574    0.486481    0.677963    11.00000   -1.50000
H23C  2    0.779078    0.489615    0.705485    11.00000   -1.50000
AFIX   0
C24   1    0.733153    0.146373    0.798826    11.00000    0.02936    0.02719 =
         0.04144    0.01853    0.00108   -0.00055
C25   1    0.498895    0.187884    0.587013    11.00000    0.11684    0.02021 =
         0.03700   -0.00859   -0.01710    0.00075
AFIX  43
H25   2    0.490376    0.195328    0.555809    11.00000   -1.20000
AFIX   0
C26   1    0.465048    0.122369    0.683825    11.00000    0.05522    0.03288 =
         0.05837    0.00372    0.01659   -0.01189
AFIX  23
H26A  2    0.500848    0.107690    0.709929    11.00000   -1.20000
H26B  2    0.417150    0.101586    0.668589    11.00000   -1.20000
AFIX   0
C27   1    0.560774    0.298502    0.949078    11.00000    0.05459    0.08995 =
         0.02241    0.01184   -0.00297   -0.00348
AFIX 137
H27A  2    0.542835    0.291019    0.979939    11.00000   -1.50000
H27B  2    0.553745    0.329675    0.944607    11.00000   -1.50000
H27C  2    0.631607    0.289918    0.944730    11.00000   -1.50000
AFIX   0
C28   1    0.929381    0.233299    0.577143    11.00000    0.04130    0.08282 =
         0.07785    0.03602    0.03535    0.02468
AFIX 137
H28A  2    0.888663    0.248365    0.553200    11.00000   -1.50000
H28B  2    0.990401    0.220913    0.564378    11.00000   -1.50000
H28C  2    0.950088    0.253704    0.601288    11.00000   -1.50000
AFIX   0
C29   1    0.180257    0.339677    0.609564    11.00000    0.03247    0.04405 =
         0.05896    0.01298   -0.01583   -0.00536
AFIX 137
H29A  2    0.112226    0.328170    0.600989    11.00000   -1.50000
H29B  2    0.215545    0.346942    0.582108    11.00000   -1.50000
H29C  2    0.173363    0.365626    0.628091    11.00000   -1.50000
AFIX   0
C30   1    0.259097    0.251062    0.791377    11.00000    0.02746    0.03444 =
         0.04952    0.00606    0.00800    0.00570
C31   1    0.312994    0.412280    0.808263    11.00000    0.03959    0.02936 =
         0.08352   -0.00434    0.03959    0.00020
C32   1    0.505015    0.286960    0.863030    11.00000    0.02088    0.05258 =
         0.04047    0.01920    0.01003    0.00385
C33   1    0.485994    0.273869    0.913141    11.00000    0.05565    0.04543 =
         0.03541    0.00608    0.02495   -0.00263
C34   1    0.327137    0.266894    0.471803    11.00000    0.04989    0.06333 =
         0.05585   -0.01892    0.01458   -0.02087
AFIX 137
H34A  2    0.289076    0.292499    0.480560    11.00000   -1.50000
H34B  2    0.320787    0.244353    0.494756    11.00000   -1.50000
H34C  2    0.299259    0.256381    0.442332    11.00000   -1.50000
AFIX   0
C35   1    0.173672    0.220256    0.805702    11.00000    0.04471    0.03842 =
         0.06712    0.00027    0.01865   -0.01000
C36   1    0.135644    0.493544    0.469581    11.00000    0.03821    0.04213 =
         0.04493    0.00047   -0.01310    0.00365
AFIX 137
H36A  2    0.101566    0.506135    0.495230    11.00000   -1.50000
H36B  2    0.086948    0.491543    0.443228    11.00000   -1.50000
H36C  2    0.193363    0.511819    0.462043    11.00000   -1.50000
AFIX   0
C37   1    0.503031    0.495209    0.787858    11.00000    0.05388    0.02445 =
         0.04647    0.00113    0.02288   -0.00371
C38   1    0.451758    0.309667    0.428255    11.00000    0.05531    0.02945 =
         0.03483   -0.01313   -0.00858   -0.00309
AFIX 137
H38A  2    0.413343    0.298329    0.401404    11.00000   -1.50000
H38B  2    0.524064    0.312513    0.421760    11.00000   -1.50000
H38C  2    0.424474    0.337965    0.436040    11.00000   -1.50000
AFIX   0
C39   1    0.081074    0.567191    0.631374    11.00000    0.05084    0.05130 =
         0.06143   -0.00386   -0.00059    0.02667
AFIX 137
H39A  2    0.021344    0.583969    0.639496    11.00000   -1.50000
H39B  2    0.063372    0.549935    0.604242    11.00000   -1.50000
H39C  2    0.137298    0.586799    0.625158    11.00000   -1.50000
AFIX   0
C40   1    0.262575    0.263362    0.607416    11.00000    0.03851    0.04550 =
         0.07764   -0.00847   -0.01142   -0.01489
AFIX 137
H40A  2    0.300044    0.241691    0.625882    11.00000   -1.50000
H40B  2    0.302646    0.271400    0.581598    11.00000   -1.50000
H40C  2    0.196638    0.251435    0.596216    11.00000   -1.50000
AFIX   0
C41   1    0.091880    0.423826    0.508902    11.00000    0.02791    0.05444 =
         0.06976    0.00854   -0.01477   -0.00172
AFIX 137
H41A  2    0.120357    0.397473    0.522854    11.00000   -1.50000
H41B  2    0.034375    0.416398    0.487682    11.00000   -1.50000
H41C  2    0.067969    0.442890    0.532608    11.00000   -1.50000
AFIX   0
C42   1    0.489345    0.144478    0.603557    11.00000    0.23244    0.03346 =
         0.04307    0.01869   -0.02383   -0.04862
AFIX  23
H42A  2    0.519795    0.124416    0.581939    11.00000   -1.20000
H42B  2    0.415844    0.137273    0.604648    11.00000   -1.20000
AFIX   0
C43   1    0.811331    0.405861    0.725249    11.00000    0.03005    0.05282 =
         0.07018    0.00119   -0.00113   -0.01267
AFIX 137
H43A  2    0.877822    0.420283    0.724586    11.00000   -1.50000
H43B  2    0.819493    0.375157    0.718570    11.00000   -1.50000
H43C  2    0.784442    0.409187    0.755426    11.00000   -1.50000
AFIX   0
C44   1    0.373055    0.287478    0.920742    11.00000    0.05887    0.08176 =
         0.05610    0.02789    0.02005    0.01346
AFIX 137
H44A  2    0.326376    0.271058    0.900184    11.00000   -1.50000
H44B  2    0.364722    0.318339    0.914538    11.00000   -1.50000
H44C  2    0.357372    0.281556    0.952259    11.00000   -1.50000
AFIX   0
C45   1    0.407056    0.160579    0.700122    11.00000    0.04651    0.03952 =
         0.06466   -0.00714    0.01181   -0.01055
AFIX  23
H45A  2    0.352775    0.168663    0.676994    11.00000   -1.20000
H45B  2    0.374039    0.153070    0.728497    11.00000   -1.20000
AFIX   0
C46   1    0.203072    0.421794    0.440861    11.00000    0.04881    0.04491 =
         0.06205   -0.01059   -0.01761    0.00783
AFIX 137
H46A  2    0.253647    0.437901    0.424349    11.00000   -1.50000
H46B  2    0.141347    0.417386    0.421095    11.00000   -1.50000
H46C  2    0.231691    0.393781    0.450178    11.00000   -1.50000
AFIX   0
C47   1    0.497421    0.224639    0.919088    11.00000    0.07562    0.06382 =
         0.04252    0.03176    0.02204    0.01887
AFIX 137
H47A  2    0.443585    0.209989    0.900553    11.00000   -1.50000
H47B  2    0.491393    0.217097    0.951104    11.00000   -1.50000
H47C  2    0.564538    0.215587    0.909380    11.00000   -1.50000
AFIX   0
C48   1    0.146116    0.563091    0.712749    11.00000    0.08335    0.05904 =
         0.05119   -0.00052    0.02697    0.02044
AFIX 137
H48A  2    0.088214    0.580876    0.721109    11.00000   -1.50000
H48B  2    0.203555    0.581748    0.705739    11.00000   -1.50000
H48C  2    0.166840    0.544054    0.738123    11.00000   -1.50000
AFIX   0
C49   1    0.507966    0.538574    0.814245    11.00000    0.12818    0.03809 =
         0.03274   -0.00038    0.02676   -0.00248
C50   1    0.027833    0.505268    0.682740    11.00000    0.03275    0.05117 =
         0.16651    0.00087    0.04925    0.00362
AFIX 137
H50A  2    0.047820    0.488609    0.710030    11.00000   -1.50000
H50B  2    0.014502    0.485597    0.657100    11.00000   -1.50000
H50C  2   -0.034199    0.521801    0.687980    11.00000   -1.50000
AFIX   0
C51   1    0.704605    0.097930    0.788057    11.00000    0.06439    0.02502 =
         0.06114    0.02312   -0.01264   -0.00219
AFIX 137
H51A  2    0.751506    0.078890    0.805638    11.00000   -1.50000
H51B  2    0.710290    0.092422    0.755566    11.00000   -1.50000
H51C  2    0.634282    0.092379    0.796275    11.00000   -1.50000
AFIX   0
C52   1    0.864535    0.196796    0.597011    11.00000    0.07393    0.05248 =
         0.09677    0.03644    0.05718    0.03390
C53   1    0.850833    0.154200    0.790997    11.00000    0.03719    0.05394 =
         0.08586    0.01478    0.00127    0.00288
AFIX 137
H53A  2    0.866642    0.184912    0.794657    11.00000   -1.50000
H53B  2    0.865740    0.145012    0.760254    11.00000   -1.50000
H53C  2    0.892693    0.137504    0.813251    11.00000   -1.50000
AFIX   0
C54   1    0.180512    0.470695    0.810889    11.00000    0.14024    0.11660 =
         0.14509    0.04724    0.07316    0.10052
AFIX 137
H54A  2    0.234478    0.484174    0.830380    11.00000   -1.50000
H54B  2    0.113610    0.477590    0.822394    11.00000   -1.50000
H54C  2    0.183801    0.481639    0.779827    11.00000   -1.50000
AFIX   0
C55   1    0.196091    0.420116    0.810997    11.00000    0.05400    0.08952 =
         0.07984    0.04266    0.03494    0.02616
C56   1    0.711584    0.156473    0.847636    11.00000    0.06914    0.04566 =
         0.03638    0.01441   -0.01189    0.00724
AFIX 137
H56A  2    0.730150    0.186472    0.854411    11.00000   -1.50000
H56B  2    0.751995    0.137265    0.867973    11.00000   -1.50000
H56C  2    0.638650    0.152216    0.852108    11.00000   -1.50000
AFIX   0
C57   1    0.159175    0.399863    0.854744    11.00000    0.06550    0.16697 =
         0.11432    0.06592    0.07519    0.04210
AFIX 137
H57A  2    0.216522    0.385294    0.871059    11.00000   -1.50000
H57B  2    0.105002    0.378903    0.847028    11.00000   -1.50000
H57C  2    0.132453    0.422473    0.874049    11.00000   -1.50000
AFIX   0
C58   1    0.132432    0.193777    0.763708    11.00000    0.06926    0.08604 =
         0.08943   -0.02011    0.02123   -0.03361
AFIX 137
H58A  2    0.098812    0.213218    0.741362    11.00000   -1.50000
H58B  2    0.083078    0.172344    0.773331    11.00000   -1.50000
H58C  2    0.189466    0.179115    0.750017    11.00000   -1.50000
AFIX   0
C59   1    0.697896    0.406647    0.872862    11.00000    0.12896    0.05223 =
         0.06704   -0.00954    0.02050    0.00440
C60   1    0.086212    0.245244    0.825920    11.00000    0.06710    0.07075 =
         0.14091   -0.02469    0.07292   -0.02585
AFIX 137
H60A  2    0.114500    0.268072    0.845839    11.00000   -1.50000
H60B  2    0.045215    0.225563    0.843510    11.00000   -1.50000
H60C  2    0.042917    0.258097    0.801358    11.00000   -1.50000
AFIX   0
C61   1    0.138387    0.399087    0.769920    11.00000    0.02717    0.18804 =
         0.15412    0.09157    0.02878    0.00020
AFIX 137
H61A  2    0.120625    0.421155    0.747061    11.00000   -1.50000
H61B  2    0.075761    0.385477    0.779742    11.00000   -1.50000
H61C  2    0.181998    0.377228    0.756779    11.00000   -1.50000
AFIX   0
C62   1    0.224058    0.187355    0.840970    11.00000    0.08807    0.06902 =
         0.11069    0.05234    0.00333   -0.03118
AFIX 137
H62A  2    0.284612    0.174409    0.828355    11.00000   -1.50000
H62B  2    0.174683    0.164686    0.847274    11.00000   -1.50000
H62C  2    0.244205    0.202515    0.869209    11.00000   -1.50000
AFIX   0
C63   1    0.435668    0.570845    0.797232    11.00000    0.16909    0.06829 =
         0.10285   -0.04815   -0.05109    0.06013
AFIX 137
H63A  2    0.367106    0.563509    0.806574    11.00000   -1.50000
H63B  2    0.435339    0.571750    0.764004    11.00000   -1.50000
H63C  2    0.455655    0.599103    0.809611    11.00000   -1.50000
AFIX   0
C64   1    0.514911    0.530776    0.864688    11.00000    0.26952    0.06557 =
         0.05655   -0.03218   -0.00845    0.01799
AFIX 137
H64A  2    0.549637    0.555142    0.880013    11.00000   -1.50000
H64B  2    0.553705    0.504292    0.871265    11.00000   -1.50000
H64C  2    0.445914    0.527816    0.875634    11.00000   -1.50000
AFIX   0
C65   1    0.931200    0.176434    0.637504    11.00000    0.20067    0.41178 =
         0.28451    0.29450    0.20639    0.27539
AFIX 137
H65A  2    0.923463    0.193540    0.665042    11.00000   -1.50000
H65B  2    1.003233    0.176237    0.630047    11.00000   -1.50000
H65C  2    0.908443    0.146836    0.642654    11.00000   -1.50000
AFIX   0
C66   1    0.836179    0.164106    0.560598    11.00000    0.23616    0.14137 =
         0.33354   -0.16051    0.24037   -0.09384
AFIX 137
H66A  2    0.786482    0.143701    0.571965    11.00000   -1.50000
H66B  2    0.897611    0.148491    0.552454    11.00000   -1.50000
H66C  2    0.806027    0.178893    0.533724    11.00000   -1.50000
AFIX   0
C67   1    0.617888    0.558021    0.800538    11.00000    0.16128    0.08328 =
         0.34239   -0.11475    0.04862   -0.07256
AFIX 137
H67A  2    0.648195    0.538827    0.778555    11.00000   -1.50000
H67B  2    0.663822    0.560264    0.827803    11.00000   -1.50000
H67C  2    0.607671    0.586653    0.787024    11.00000   -1.50000
AFIX   0
C68   1    0.797128    0.416435    0.906957    11.00000    0.15717    0.14164 =
         0.17495    0.04763   -0.11261   -0.05573
O37   6    0.499880    0.442548    0.953504    11.00000    0.28777    0.23857 =
         0.22558   -0.10721    0.16875   -0.07958
AFIX 147
H37   2    0.501136    0.465086    0.937947    11.00000   -1.50000
AFIX   0
C69   1    0.402088    0.426215    0.951756    11.00000    0.31951    0.34814 =
         0.43936   -0.20114    0.31485   -0.22050
AFIX 137
H69A  2    0.367814    0.435017    0.978997    11.00000   -1.50000
H69B  2    0.404828    0.394689    0.950313    11.00000   -1.50000
H69C  2    0.363947    0.437300    0.924712    11.00000   -1.50000
AFIX   0
C70   1    0.704618    0.331741    0.798185    11.00000    0.41940
C71   1    0.806924    0.313104    0.810272    11.00000    0.02683
C72   1    0.908836    0.351491    0.819076    11.00000    0.57025
AFIX 137
H72A  2    0.912646    0.360844    0.850867    11.00000   -1.50000
H72B  2    0.895677    0.376477    0.799290    11.00000   -1.50000
H72C  2    0.973763    0.338087    0.811873    11.00000   -1.50000
AFIX   0
PART 1  31.00
C73   1    0.873257    0.378819    0.915045    31.00000    0.08067
PART 1  21.00
C74   1    0.800219    0.281450    0.848759    21.00000    0.05014
AFIX 137
H74A  2    0.752107    0.292252    0.870408    21.00000   -1.50000
H74B  2    0.867926    0.277938    0.864165    21.00000   -1.50000
H74C  2    0.776263    0.253575    0.836728    21.00000   -1.50000
AFIX   0
PART 0
C75   1    0.852112    0.456395    0.865428    11.00000    0.35583
AFIX 137
H75A  2    0.907120    0.442514    0.849541    11.00000   -1.50000
H75B  2    0.879398    0.481526    0.882170    11.00000   -1.50000
H75C  2    0.798016    0.465639    0.843275    11.00000   -1.50000
AFIX   0
PART 2  -31.00
C76   1    0.766345    0.388252    0.952895   -31.00000    0.21478    0.19448 =
         0.12247    0.08600   -0.11396   -0.08695
PART 0
C78   1    0.839249    0.279093    0.754496    11.00000    0.22625
AFIX 137
H78A  2    0.887737    0.256055    0.763049    11.00000   -1.50000
H78B  2    0.869526    0.298245    0.732464    11.00000   -1.50000
H78C  2    0.776179    0.266466    0.740891    11.00000   -1.50000
AFIX   0
HKLF 4

REM  tryA_a.res in P2(1)/n
REM R1 =  0.0616 for   17484 Fo > 4sig(Fo)  and  0.1047 for all   25776 data
REM   1135 parameters refined using      0 restraints

END

WGHT      0.0766     95.3463

REM Highest difference peak  3.685,  deepest hole -1.761,  1-sigma level  0.293
Q1    1   0.8277  0.2641  0.7266  11.00000  0.05    3.68
Q2    1   0.8893  0.5447  0.8466  11.00000  0.05    2.87
Q3    1   0.3806  0.5183  0.9706  11.00000  0.05    2.36
Q4    1   0.8974  0.2841  0.6999  11.00000  0.05    2.19
Q5    1   0.7664  0.4597  0.9276  11.00000  0.05    2.13
;
_shelx_res_checksum   11005

_shelx_hkl_file
;
  -2   0   0 7189.78  238.68
  -3   0   0    3.00    3.10
  -3   0   0   -0.10    3.20
  -4   0   0  361.36   18.80
  -4   0   0  401.66   23.70
  -5   0   0    0.90    3.70
  -5   0   0   -1.10    4.20
  -6   0   0   98.99   12.60
  -6   0   0   90.99   15.80
  -7   0   0    0.10    6.70
  -7   0   0  -11.00    3.40
  -8   0   0  941.11   53.29
  -8   0   0  870.71   42.20
  -9   0   0    2.20    9.20
 -10   0   0  448.16   40.60
 -11   0   0    5.40   12.80
 -12   0   0  194.88   33.00
 -13   0   0   14.90   15.20
 -14   0   0  -14.10   16.80
 -15   0   0   11.40   20.90
   0  -1   0   -0.30    0.40
   0   1   0    0.10    0.30
   1   1   0 5325.67  162.78
  -1   1   0 4520.95  164.28
  -2   1   0  200.38   11.20
  -3  -1   0 1721.23   63.29
  -3  -1   0 1608.84   57.89
  -3   1   0 1549.74   60.39
  -3   1   0 1669.33   63.99
  -4  -1   0  171.48   14.50
  -4  -1   0  163.88   10.80
  -4   1   0  163.38   12.50
  -4   1   0  164.58   15.00
  -5  -1   0  108.09   15.60
  -5  -1   0   90.09   10.20
  -5   1   0  111.59   10.80
  -5   1   0   97.39   15.20
  -6  -1   0   -3.10    3.70
  -6  -1   0    4.40    6.50
  -6   1   0    5.20    7.50
  -6   1   0   -6.00    3.70
  -7  -1   0  192.58   14.80
  -7  -1   0  193.18   23.70
  -7   1   0  187.88   15.80
  -7   1   0  215.88   29.40
  -7   1   0  194.08   25.20
  -8  -1   0  179.08   15.70
  -8  -1   0  197.48   27.10
  -8   1   0  303.27   34.70
  -8   1   0  154.58   15.50
  -9  -1   0   85.79   19.20
  -9   1   0  106.79   21.10
 -10  -1   0  101.49   22.80
 -10   1   0  198.98   30.40
 -11  -1   0   10.50   11.90
 -11   1   0    9.60   13.70
 -12  -1   0   30.00   15.70
 -12   1   0   21.20   15.40
 -13  -1   0   14.20   12.50
 -13   1   0    3.10   16.60
 -14  -1   0    4.40   17.30
 -14   1   0    4.40   17.80
 -15  -1   0   44.40   26.00
  16   1   0  -45.20   17.70
   0   2   0    1.20    0.90
  -1  -2   0  162.98    7.70
   1   2   0  147.59    7.50
  -1   2   0  145.59    9.10
  -2  -2   0  589.74   21.50
  -2  -2   0  553.04   23.50
  -2   2   0  524.75   24.60
  -3  -2   0   35.10    6.80
  -3  -2   0   38.50    5.00
  -3   2   0   30.70    6.60
  -3   2   0   34.40    7.20
  -4  -2   0  584.34   29.90
  -4   2   0  578.14   31.30
  -4   2   0  589.74   29.00
  -5  -2   0  198.28   12.60
  -5  -2   0  215.48   18.00
  -5   2   0  213.78   21.40
  -5   2   0  204.58   16.10
  -5   2   0  213.68   19.00
  -6  -2   0   52.49   12.80
  -6  -2   0   42.90    7.10
  -6   2   0   49.50   10.30
  -6   2   0   55.39   14.70
  -6   2   0   35.60   11.00
  -7  -2   0    0.30    4.30
  -7  -2   0   18.30    9.30
  -7   2   0   20.70    7.00
  -7   2   0   39.40   13.90
  -7   2   0   38.80   13.20
  -8  -2   0    3.10    8.30
  -8  -2   0    2.40    5.20
  -8   2   0    1.90    7.80
  -8   2   0   -2.50    5.20
  -8   2   0   25.20   16.00
  -9  -2   0   -7.30    6.90
  -9   2   0    7.20    8.30
  -9   2   0    1.10    9.10
 -10  -2   0   81.29   19.40
 -10   2   0   69.29   19.40
 -11  -2   0   29.50   15.80
 -11   2   0    0.60   13.30
 -12  -2   0  508.75   47.30
 -12   2   0  453.25   55.59
 -13  -2   0  180.58   34.10
 -13   2   0   93.29   28.00
 -14  -2   0  221.58   42.10
 -14   2   0  247.68   48.70
 -15  -2   0   73.69   32.00
  15   2   0   48.60   32.70
 -16  -2   0  112.99   37.50
  16   2   0  180.58   49.00
   0   3   0    3.80    2.10
  -1  -3   0  499.25   20.50
  -1   3   0  508.65   22.50
   1   3   0  527.35   20.70
   1   3   0  416.96   19.60
  -2  -3   0  685.53   26.40
  -2  -3   0  660.73   25.70
  -2   3   0  663.83   29.60
   2   3   0  630.14   25.30
  -3  -3   0  193.48   13.30
  -3  -3   0  202.48   10.70
  -3   3   0  190.48   14.80
  -3   3   0  182.78   16.90
  -4  -3   0  327.47   20.30
   4  -3   0  346.77   27.50
  -4   3   0  326.77   24.20
  -4   3   0  315.07   20.70
  -4   3   0  352.06   23.00
  -5  -3   0    9.00    6.00
   5  -3   0    5.60    6.80
  -5  -3   0   13.60    4.50
  -5   3   0   -6.60    6.70
  -5   3   0    3.20    6.40
  -5   3   0    4.50    5.10
   6  -3   0  219.68   21.90
  -6  -3   0  215.68   13.60
  -6  -3   0  245.28   21.00
  -6   3   0  232.98   18.50
  -6   3   0  195.08   23.10
  -6   3   0  230.18   23.80
   7  -3   0   25.40   10.10
  -7  -3   0   25.10    5.50
  -7  -3   0   10.30    8.10
  -7   3   0   19.60   11.20
  -7   3   0   21.20    8.70
  -7   3   0   23.10   10.70
  -8  -3   0  382.76   31.70
  -8  -3   0  388.26   21.30
  -8   3   0  408.36   36.20
  -8   3   0  367.16   25.90
  -8   3   0  378.16   33.30
  -9  -3   0   40.00   15.20
  -9   3   0   55.99   12.80
  -9   3   0   85.59   20.30
 -10  -3   0   50.89   17.40
 -10   3   0   68.89   20.30
 -11  -3   0   28.90   15.70
 -11   3   0   21.80   15.60
 -12  -3   0   59.79   20.30
 -12   3   0   20.20   18.60
 -13  -3   0   31.40   17.20
 -13   3   0   22.50   17.90
 -14  -3   0  266.47   44.50
  14   3   0  234.18   48.80
 -15  -3   0   45.60   24.60
  15   3   0    6.30   21.10
 -16  -3   0  114.29   39.80
   0   4   0  516.05   23.40
  -1  -4   0   66.09    6.50
  -1   4   0   68.79    8.70
  -1   4   0   66.29    9.20
   1   4   0   47.40    6.20
  -2  -4   0   92.19    7.80
  -2  -4   0   98.59    6.70
   2  -4   0  103.29   10.10
  -2   4   0  105.99   10.80
   2   4   0  102.59    8.40
   2   4   0   96.89    7.60
  -2   4   0  103.99   10.30
  -3  -4   0  475.05   22.50
   3  -4   0  502.85   26.80
  -3  -4   0  493.95   21.10
   3   4   0  440.56   27.80
   3   4   0  489.45   20.80
  -3   4   0  448.36   25.70
  -3   4   0  473.55   28.10
  -4  -4   0  230.68   12.30
   4  -4   0  183.58   17.30
  -4  -4   0  214.68   15.50
  -4   4   0  187.98   16.70
   4   4   0  203.08   20.00
  -4   4   0  189.08   19.00
  -4   4   0  190.58   17.30
   5  -4   0    6.20    6.80
  -5  -4   0   17.40    4.60
  -5  -4   0    7.10    5.20
  -5   4   0    8.70    6.20
  -5   4   0   12.10   10.70
  -5   4   0    5.10    6.70
  -6  -4   0  167.98   19.90
  -6  -4   0  210.28   12.40
   6  -4   0  218.98   25.70
  -6   4   0  168.28   18.00
  -6   4   0  220.28   25.50
  -6   4   0  210.38   27.50
   7  -4   0    9.50    9.90
  -7  -4   0   16.90    9.40
  -7  -4   0   23.80    4.40
  -7   4   0   -1.50    8.60
  -7   4   0   32.70   11.90
  -7   4   0   40.60   11.00
  -8  -4   0  149.29   22.60
  -8   4   0  141.99   19.40
  -8   4   0  178.98   26.50
  -8   4   0  140.79   28.20
  -9  -4   0  159.88   26.60
  -9   4   0  142.39   26.10
  -9   4   0  173.58   22.50
 -10  -4   0  172.88   27.10
 -10   4   0  170.48   30.70
 -11  -4   0   -5.20    9.40
 -11   4   0   -8.60   12.20
 -12  -4   0  470.85   45.70
  12   4   0  473.75   64.89
 -12   4   0  562.14   52.59
 -13  -4   0  186.28   35.90
  13   4   0  133.69   38.00
 -14  -4   0  326.57   47.70
  14   4   0  255.97   53.19
 -15  -4   0  147.59   34.90
  15   4   0  252.47   50.19
 -16  -4   0  204.78   44.80
  16   4   0  128.69   40.60
   0   5   0    4.60    2.00
   0   5   0    5.80    3.10
   1  -5   0  148.59   10.20
  -1  -5   0  126.19   10.30
  -1   5   0  142.39   10.70
  -1   5   0  176.58   12.90
   1   5   0  148.49   10.80
  -2  -5   0  361.86   15.20
   2  -5   0  380.96   20.90
  -2  -5   0  355.66   18.70
   2   5   0  395.96   24.10
  -2   5   0  392.96   22.60
   2   5   0  387.16   19.40
   2   5   0  346.07   18.50
  -2   5   0  403.76   22.50
  -3  -5   0  252.07   14.50
   3  -5   0  293.97   19.40
  -3  -5   0  268.27   14.70
   3   5   0  268.57   21.00
   3   5   0  222.58   13.70
  -3   5   0  260.07   18.90
  -3   5   0  258.87   20.20
   4  -5   0   49.60   11.30
  -4  -5   0   52.89    7.00
  -4  -5   0   55.69    9.00
  -4   5   0   71.79   14.90
  -4   5   0   57.89   11.70
   4   5   0   45.00   12.10
  -4   5   0   57.99   11.30
  -5  -5   0  729.03   29.90
   5  -5   0  730.33   40.30
  -5  -5   0  649.34   34.70
  -5   5   0  657.63   37.00
  -5   5   0  699.23   39.30
  -5   5   0  656.63   41.70
   5   5   0  683.63   42.70
  -6  -5   0   11.70    3.70
  -6  -5   0    5.30    6.60
   6  -5   0   -1.60    6.80
  -6   5   0    2.50    7.10
   6   5   0   -4.30    7.40
  -6   5   0   -1.00    6.70
  -6   5   0    3.50    8.70
   7  -5   0  297.57   28.60
  -7  -5   0  300.37   25.10
  -7  -5   0  262.97   15.60
  -7   5   0  303.47   24.70
  -7   5   0  361.66   30.30
  -7   5   0  350.86   31.60
   8  -5   0   10.70   11.10
  -8  -5   0    7.00    7.70
  -8   5   0    8.20    9.70
  -8   5   0   -9.70    7.70
  -8   5   0   10.50    6.50
  -9  -5   0   33.40   13.50
  -9   5   0   25.70    9.00
  -9   5   0   18.00   13.60
 -10  -5   0   24.00   12.70
 -10   5   0   47.00   20.30
  10   5   0   22.50   19.40
 -11  -5   0   21.90   11.60
 -11   5   0   -4.50   13.80
  11   5   0   11.10   14.40
 -12  -5   0   76.39   22.30
 -12   5   0  141.99   36.40
  12   5   0  155.48   42.00
 -13  -5   0  280.27   42.40
  13   5   0  537.15   71.39
 -14  -5   0   79.69   25.10
  14   5   0  176.08   42.00
 -15  -5   0  489.75   63.09
  15   5   0  371.66   64.19
 -16  -5   0  -17.50   19.00
  16   5   0   42.50   28.60
   0  -6   0 3176.88  107.29
   0   6   0 3152.58  114.69
   0   6   0 3206.48  108.59
  -1  -6   0  538.75   25.80
   1  -6   0  527.15   23.60
  -1   6   0  500.85   27.30
  -1   6   0  478.15   24.00
  -2  -6   0 1575.94   62.59
   2  -6   0 1612.84   63.69
  -2  -6   0 1658.13   62.29
   2   6   0 1592.04   56.79
   2   6   0 1595.94   68.69
   2   6   0 1675.93   62.29
  -2   6   0 1601.64   66.19
  -2   6   0 1744.73   65.99
   2   6   0 1626.34   62.39
   2   6   0 1607.34   57.29
  -3  -6   0   48.50    7.40
   3  -6   0   64.99   11.70
  -3  -6   0   47.60    6.70
  -3   6   0   44.20    9.80
   3   6   0   48.80    7.50
   3   6   0   42.20   11.10
  -3   6   0   41.10   11.10
   3   6   0   58.29    7.80
   3   6   0   51.49    8.20
  -4  -6   0 1121.99   44.60
  -4  -6   0 1060.79   45.70
   4  -6   0 1155.98   52.99
  -4   6   0 1164.18   55.49
  -4   6   0 1162.98   52.49
  -4   6   0 1143.19   52.49
   4   6   0 1128.59   57.19
   4   6   0 1070.49   43.90
   5  -6   0   13.90    8.60
  -5  -6   0   15.70    4.90
  -5  -6   0   21.50    7.30
   5   6   0   18.10   10.00
  -5   6   0   14.40    8.70
  -5   6   0   15.80    7.40
  -5   6   0   18.10    9.70
   6  -6   0  363.96   31.40
  -6  -6   0  444.16   28.80
  -6  -6   0  524.65   22.80
  -6   6   0  440.36   33.60
  -6   6   0  429.46   30.50
  -6   6   0  472.95   36.80
   6   6   0  441.96   36.70
   7  -6   0  113.49   19.10
  -7  -6   0  125.99   18.80
  -7   6   0  102.19   20.00
  -7   6   0  120.79   18.80
  -7   6   0  118.59   22.50
   7   6   0  106.09   22.40
   8  -6   0  136.89   25.10
  -8  -6   0  114.19   19.60
   8   6   0  120.59   25.70
  -8   6   0  119.69   24.50
  -8   6   0  128.69   19.40
  -8   6   0   69.09   19.40
  -9  -6   0   38.40   13.80
  -9   6   0   40.60   18.40
   9   6   0   55.09   20.00
  -9   6   0   62.49   14.90
 -10  -6   0  514.65   41.50
  10   6   0  518.15   50.99
 -10   6   0  503.85   55.79
 -11  -6   0   89.09   22.80
  11   6   0  168.18   38.30
 -11   6   0  145.89   32.10
 -12  -6   0  170.08   31.50
  12   6   0  168.88   39.30
 -13  -6   0   29.10   16.80
  13   6   0   18.90   18.40
 -14  -6   0   23.00   16.60
  14   6   0    2.30   19.20
 -15  -6   0   47.90   22.00
  15   6   0   76.89   33.10
 -16  -6   0    5.00   20.60
  16   6   0  -18.60   23.40
   0  -7   0   -1.30    2.00
   0   7   0    2.90    4.30
   0   7   0    2.90    2.40
  -1  -7   0 1768.92   69.39
   1  -7   0 1773.02   66.39
   1   7   0 1861.11   77.29
  -1   7   0 1781.52   72.09
  -1   7   0 1770.92   67.49
   2  -7   0  209.18   15.60
  -2  -7   0  202.88   14.80
   2   7   0  214.08   15.10
   2   7   0  216.48   19.40
  -2   7   0  206.58   17.40
   2   7   0  207.08    9.80
   2   7   0  194.68   14.70
  -2   7   0  183.98   15.40
  -3  -7   0  360.36   16.60
   3  -7   0  381.26   23.70
  -3  -7   0  332.97   16.00
  -3  -7   0  363.56   20.20
   3   7   0  315.87   16.70
   3   7   0  368.86   27.00
   3   7   0  350.96   17.70
   3   7   0  329.97   20.10
   3   7   0  332.07   19.40
  -3   7   0  334.57   23.90
  -3   7   0  344.17   24.80
  -4  -7   0  200.38   14.10
   4  -7   0  210.08   18.80
  -4  -7   0  193.68   13.80
  -4   7   0  192.98   19.00
  -4   7   0  217.68   25.50
   4   7   0  185.88   15.20
   4   7   0  193.58   14.40
   4   7   0  203.08   21.90
   4   7   0  215.88   14.10
  -5  -7   0  351.46   18.80
   5  -7   0  324.27   27.10
  -5  -7   0  270.57   19.90
  -5   7   0  269.17   24.40
  -5   7   0  292.97   25.80
  -5   7   0  286.37   27.50
   5   7   0  245.98   27.10
   5   7   0  330.97   22.10
  -6  -7   0  160.68   12.50
   6  -7   0  197.98   26.50
  -6  -7   0  163.18   19.80
   6   7   0  180.88   21.50
   6   7   0  173.78   28.10
  -6   7   0  135.29   19.70
  -6   7   0  166.78   24.00
  -6   7   0  148.09   24.50
  -7  -7   0  399.06   29.30
   7  -7   0  367.86   32.50
  -7   7   0  363.36   29.60
   7   7   0  416.96   37.90
   7   7   0  424.96   31.40
  -7   7   0  344.27   32.40
  -7   7   0  427.66   36.30
  -8  -7   0   58.59   15.10
   8  -7   0   88.19   20.70
  -8   7   0   66.09   19.70
  -8   7   0   45.90   15.40
  -8   7   0   77.39   15.70
   8   7   0   70.69   21.10
  -9  -7   0   37.40   13.40
  -9   7   0   41.50   12.10
   9   7   0   81.39   24.20
  -9   7   0   46.20   17.30
 -10  -7   0   12.60   10.60
 -10   7   0   15.80   15.30
  10   7   0   42.70   19.00
 -11  -7   0  397.56   38.00
  11   7   0  398.06   58.39
 -12  -7   0   24.90   13.70
  12   7   0   30.50   23.90
 -13  -7   0  207.88   36.70
  13   7   0  214.18   49.10
 -14  -7   0   94.39   26.90
  14   7   0   27.30   26.90
 -15  -7   0    6.50   17.10
  15   7   0  -12.10   22.30
 -16  -7   0   -6.70   19.40
  16   7   0   -3.30   30.20
   0   8   0  133.59   20.30
   0   8   0  117.29    9.00
   0   8   0  148.19   14.80
   1  -8   0  250.37   15.40
  -1  -8   0  286.07   18.80
   1   8   0  231.08   17.80
  -1   8   0  258.97   19.80
   1   8   0  249.58   22.40
  -1   8   0  252.97   16.40
   2  -8   0  674.03   32.10
  -2  -8   0  610.34   31.70
  -2   8   0  593.14   34.40
  -2   8   0  633.34   32.60
   2   8   0  644.74   31.70
   2   8   0  569.54   30.70
   2   8   0  706.13   39.30
   3  -8   0  530.05   29.40
  -3  -8   0  501.85   20.50
  -3  -8   0  458.65   20.50
  -3  -8   0  499.85   26.40
   3   8   0  490.55   26.00
   3   8   0  492.55   26.60
   3   8   0  491.05   22.10
   3   8   0  510.05   33.70
   3   8   0  480.35   21.30
  -3   8   0  520.65   31.20
  -3   8   0  491.65   30.90
  -4  -8   0 3527.65  125.19
   4  -8   0 3679.23  135.99
  -4  -8   0 3570.64  128.29
  -4  -8   0 3481.35  125.59
  -4   8   0 3502.35  138.09
   4   8   0 3584.84  142.49
   4   8   0 3603.24  130.09
  -4   8   0 3573.74  137.39
   4   8   0 3652.63  126.59
   4   8   0 3536.05  127.89
  -5  -8   0   51.89    8.50
   5  -8   0   15.80    9.20
   5  -8   0   45.70   10.70
  -5  -8   0   41.60    8.40
   5   8   0   36.90    8.70
   5   8   0   46.40   15.60
  -5   8   0   35.20   11.80
  -5   8   0   54.19   13.30
   5   8   0   55.09   10.60
   5   8   0   35.90    7.50
  -5   8   0   52.29   14.60
  -6  -8   0 2983.10  106.29
  -6  -8   0 2879.51  112.19
   6  -8   0 2988.50  116.49
   6  -8   0 2917.31  121.69
  -6   8   0 2895.81  118.89
  -6   8   0 2977.90  120.79
  -6   8   0 2885.41  124.29
   6   8   0 2870.91  127.99
   6   8   0 2936.11  113.39
   7  -8   0  110.29   18.30
  -7  -8   0  102.89   16.80
   7  -8   0  104.19   21.10
  -7  -8   0  133.49   11.30
   7   8   0   98.09   25.10
   7   8   0   92.89   17.10
  -7   8   0  154.78   22.60
  -7   8   0  102.99   21.60
  -7   8   0  101.99   19.30
  -8  -8   0  587.74   39.20
   8  -8   0  649.74   47.00
   8  -8   0  608.04   41.30
  -8   8   0  613.94   45.80
  -8   8   0  645.84   48.40
   8   8   0  632.04   52.39
  -8   8   0  615.94   41.00
  -9  -8   0  383.66   33.20
   9   8   0  463.15   47.10
  -9   8   0  385.16   38.90
  -9   8   0  437.16   33.90
  -9   8   0  438.46   42.30
 -10  -8   0   76.89   19.50
  10   8   0   66.69   25.40
 -10   8   0   89.39   22.50
 -11  -8   0  157.48   29.50
  11   8   0  139.39   38.30
 -12  -8   0  204.18   34.90
  12   8   0  154.08   42.40
 -13  -8   0   21.90   17.80
  13   8   0   49.90   30.30
 -14  -8   0   28.30   17.60
  14   8   0   -1.90   22.90
 -15  -8   0   16.70   19.10
  15   8   0    1.00   21.80
 -16  -8   0   48.60   26.20
  16   8   0   82.19   39.80
   0  -9   0    0.60    2.70
   0   9   0   -3.90    6.20
   0   9   0    4.40    3.00
   0   9   0   -5.10    3.40
   0   9   0   -0.80    2.50
   1  -9   0 2147.59   76.09
  -1  -9   0 1949.70   80.09
   1   9   0 1965.80   80.69
   1   9   0 2077.29   90.39
  -1   9   0 2048.79   76.99
   1   9   0 1984.30   68.79
  -1   9   0 1986.10   86.59
  -1   9   0 2089.89   83.79
   2  -9   0  387.36   22.80
  -2  -9   0  349.57   23.50
  -2   9   0  368.36   23.40
  -2   9   0  354.56   25.90
   2   9   0  383.56   29.30
  -3  -9   0 1365.26   57.79
  -3  -9   0 1370.36   49.10
   3  -9   0 1447.96   57.59
   3  -9   0 1365.26   60.09
  -3  -9   0 1379.26   48.70
   3   9   0 1382.66   49.50
   3   9   0 1421.76   67.99
   3   9   0 1362.26   50.19
   3   9   0 1374.76   57.89
   3   9   0 1383.26   58.19
  -3   9   0 1322.87   63.19
  -3   9   0 1346.77   61.89
  -4  -9   0  146.99   11.20
  -4  -9   0  150.68   14.20
  -4  -9   0  156.48   10.90
   4  -9   0  171.78   19.30
  -4  -9   0  155.88   11.40
   4  -9   0  172.28   20.00
   4   9   0  171.08   26.10
   4   9   0  145.59   12.00
   4   9   0  140.59   11.30
   4   9   0  131.99   13.90
  -4   9   0  122.19   19.00
  -4   9   0  164.68   22.80
   4   9   0  157.88   13.90
   5  -9   0 1158.28   59.19
  -5  -9   0 1187.18   49.50
  -5  -9   0 1137.09   49.70
  -5  -9   0 1171.78   49.90
  -5   9   0 1099.79   60.29
   5   9   0 1190.08   50.19
  -5   9   0 1059.39   57.79
   5   9   0 1158.38   64.49
  -5   9   0 1212.28   58.29
   5   9   0 1181.68   49.70
   5   9   0 1197.18   52.59
   6  -9   0   44.30   13.90
  -6  -9   0   66.89   14.00
  -6  -9   0   47.00    8.80
   6  -9   0   59.69   14.30
  -6  -9   0   74.59   12.80
  -6   9   0   70.19   15.90
   6   9   0   56.89   11.70
  -6   9   0   65.09   16.50
   6   9   0   49.99   17.60
   6   9   0   49.70   10.90
  -6   9   0   72.89   15.60
  -7  -9   0  136.59   19.00
   7  -9   0  140.49   21.00
  -7  -9   0  130.09   14.40
   7  -9   0  130.29   22.60
   7   9   0  118.89   18.60
   7   9   0  179.08   30.90
  -7   9   0  139.69   23.30
  -7   9   0  138.89   21.70
  -7   9   0  147.69   27.90
  -8  -9   0  336.07   28.70
   8  -9   0  349.67   34.60
   8  -9   0  335.47   30.50
   8   9   0  422.06   42.70
  -8   9   0  329.17   30.90
  -8   9   0  356.56   35.90
  -8   9   0  361.66   35.20
  -9  -9   0   -4.70    7.40
  -9   9   0    9.50   12.10
   9   9   0    5.90   13.60
  -9   9   0   18.80    8.40
 -10  -9   0  143.79   24.50
  10   9   0  161.88   38.40
 -10   9   0  157.28   25.30
 -11  -9   0   19.70   13.70
  11   9   0   32.10   22.20
 -12  -9   0   62.89   20.10
  12   9   0   47.20   24.60
 -13  -9   0    8.40   14.60
  13   9   0    2.50   20.10
 -14  -9   0   12.60   15.10
  14   9   0    5.70   24.70
 -15  -9   0   33.40   19.50
  15   9   0   27.30   27.30
 -16  -9   0    8.50   18.80
  16   9   0    4.40   24.40
   0 -10   0 1918.01   70.29
   0 -10   0 1792.72   65.99
   0  10   0 1886.01   86.49
   0  10   0 1786.92   66.89
   0  10   0 1793.22   76.69
   0  10   0 1812.02   67.89
  -1 -10   0  560.24   32.20
   1 -10   0  556.34   26.70
   1 -10   0  598.14   28.20
  -1  10   0  557.44   37.50
  -1  10   0  581.24   29.10
  -1  10   0  615.44   35.30
   1  10   0  597.34   33.50
   1  10   0  579.84   22.00
   1  10   0  606.84   40.50
   2 -10   0  327.17   21.00
   2 -10   0  316.27   19.10
  -2 -10   0  288.77   21.40
   2  10   0  271.07   25.80
  -2  10   0  299.07   21.40
  -2  10   0  297.67   24.40
  -3 -10   0  691.03   36.50
   3 -10   0  689.43   36.70
   3 -10   0  711.83   34.40
  -3 -10   0  627.54   24.40
  -3 -10   0  647.84   34.90
   3  10   0  640.04   42.10
  -3  10   0  703.83   40.80
  -3  10   0  658.73   37.90
   3  10   0  651.03   34.70
   3  10   0  642.44   34.70
   4 -10   0   90.49   13.90
   4 -10   0   61.99   12.70
  -4 -10   0   85.09    9.60
  -4 -10   0   67.29    8.40
  -4 -10   0   62.99   11.10
  -4 -10   0   64.79    7.30
  -4  10   0   59.49   13.90
   4  10   0   70.69   18.30
   4  10   0   68.19    8.50
   4  10   0   71.49   12.20
  -4  10   0   69.59   16.10
   4  10   0   66.29   11.40
   4  10   0   78.49    9.90
   5 -10   0    9.10    8.20
   5 -10   0    0.20    3.80
  -5 -10   0   22.50    6.30
  -5 -10   0   13.60    6.40
  -5 -10   0   18.60    6.10
   5  10   0   -3.30    7.50
   5  10   0   13.40    5.00
   5  10   0   17.10    6.50
  -5  10   0   22.90   11.10
  -5  10   0   27.20   11.40
   5  10   0   22.40    7.40
   5  10   0   14.70    6.40
   6 -10   0   29.60   10.00
  -6 -10   0   50.29    9.40
   6 -10   0   60.29   16.60
  -6 -10   0   47.10   10.40
  -6 -10   0   36.10    9.90
  -6  10   0   48.00   14.50
  -6  10   0   22.10   10.40
  -6  10   0   54.39   15.50
   6  10   0   44.60   11.10
   6  10   0   27.50   12.60
   6  10   0   34.40    9.50
   7 -10   0    2.50    7.60
  -7 -10   0    4.90    5.40
  -7 -10   0   34.40    7.20
   7 -10   0    1.50    9.10
  -7  10   0   11.90    9.00
   7  10   0   15.30   15.40
   7  10   0   21.50    9.00
  -7  10   0   -0.10    8.50
  -7  10   0    4.30   12.00
   7  10   0   12.80    8.10
   8 -10   0  100.19   23.20
  -8 -10   0  104.89   18.70
   8 -10   0   96.19   19.80
   8  10   0  161.18   33.50
  -8  10   0  106.99   20.90
  -8  10   0   84.49   22.70
  -9 -10   0  129.29   23.00
   9  10   0  189.28   38.70
  -9  10   0  184.08   26.70
  -9  10   0  132.59   29.00
 -10 -10   0  188.38   29.50
  10  10   0  137.09   35.70
 -10  10   0  170.98   29.00
 -11 -10   0    9.90   11.60
  11  10   0    9.20   17.90
 -12 -10   0  248.38   36.50
  12  10   0  289.97   54.99
 -13 -10   0  113.69   27.30
  13  10   0   59.99   32.50
 -14 -10   0   45.80   19.90
  14  10   0   38.90   30.50
 -15 -10   0   36.80   20.30
  15  10   0  -27.30   19.50
 -16 -10   0   -3.30   18.80
  16  10   0   -3.40   30.20
   0 -11   0    8.30    3.60
   0 -11   0    6.50    3.40
   0  11   0   16.70    9.30
   0  11   0   24.60    5.20
   0  11   0   22.90    7.90
   1 -11   0   10.40    5.20
   1 -11   0   12.50    4.90
  -1 -11   0    7.40    5.20
  -1  11   0   24.90    6.60
   1  11   0   14.50    9.60
   1  11   0    5.00    3.00
   1  11   0   16.20    7.30
  -1  11   0   15.00    9.90
  -1  11   0   12.20    7.40
   1  11   0   13.80    2.90
   2 -11   0 1840.32   69.39
  -2 -11   0 1751.42   74.49
   2 -11   0 1708.73   70.69
   2  11   0 1784.72   84.49
  -2  11   0 1680.63   71.99
  -2  11   0 1757.52   78.59
  -3 -11   0   17.30    8.50
   3 -11   0   45.60    9.90
   3 -11   0   35.50    9.90
  -3 -11   0   28.70    8.90
   3  11   0   34.30   13.10
   3  11   0   34.10    8.50
  -3  11   0   43.10   11.70
  -3  11   0   21.10    9.30
   3  11   0   25.30    8.00
   4 -11   0  869.31   44.40
  -4 -11   0  927.21   37.20
  -4 -11   0  934.81   44.90
  -4 -11   0  929.71   34.80
   4 -11   0  926.11   48.20
  -4 -11   0  942.91   36.70
   4  11   0  919.51   44.40
  -4  11   0  828.12   50.19
   4  11   0  893.21   36.60
   4  11   0  919.11   44.90
  -4  11   0  934.41   50.69
   4  11   0  915.41   35.90
   4  11   0  952.90   55.89
  -5 -11   0    1.30    3.30
   5 -11   0    6.20    5.70
  -5 -11   0   -0.60    4.70
   5 -11   0    0.60    7.30
  -5 -11   0    1.00    3.70
   5  11   0    3.10    4.10
   5  11   0   11.40   10.60
   5  11   0    7.60    6.00
  -5  11   0   13.40    9.70
  -5  11   0    3.70    7.80
   5  11   0    4.50    5.90
   5  11   0   10.20    4.60
  -6 -11   0   10.20    6.60
  -6 -11   0   14.80    6.10
   6 -11   0    3.20    4.20
  -6 -11   0   17.60    7.50
   6 -11   0   12.80   10.70
  -6  11   0    9.80   10.00
   6  11   0   14.90   12.30
  -6  11   0   33.60   13.30
  -6  11   0   30.70   13.60
   6  11   0   24.20    7.90
   6  11   0   24.00    7.90
   6  11   0   15.50    7.50
   7 -11   0  240.28   32.20
   7 -11   0  243.68   29.10
  -7 -11   0  249.18   18.70
  -7 -11   0  242.58   21.20
  -7  11   0  255.57   34.90
   7  11   0  242.98   22.30
   7  11   0  278.57   41.80
   7  11   0  223.18   20.80
  -7  11   0  298.37   35.10
  -8 -11   0  413.86   30.60
   8 -11   0  399.66   34.20
   8 -11   0  429.36   39.30
   8  11   0  350.76   48.40
  -8  11   0  357.36   37.20
  -8  11   0  390.36   34.90
  -9 -11   0   74.69   17.20
  -9  11   0   91.49   24.10
   9  11   0   52.29   22.20
  -9  11   0   83.19   20.10
 -10 -11   0  122.59   22.80
  10  11   0  236.48   45.50
 -10  11   0  163.98   28.50
 -11 -11   0  621.04   47.50
  11  11   0  553.54   59.59
 -12 -11   0    4.10   10.90
  12  11   0   -3.20   21.70
 -13 -11   0  184.78   33.80
  13  11   0  158.88   45.40
 -14 -11   0   63.09   22.90
  14  11   0   30.40   28.40
 -15 -11   0    5.30   16.90
  15  11   0  -16.20   22.90
  16  11   0    7.40   26.30
   0 -12   0   89.39   10.10
   0 -12   0   87.39    8.40
   0 -12   0   89.59    8.10
   0 -12   0   94.69    9.00
   0  12   0   83.79    8.90
   0  12   0   79.79   18.90
   0  12   0  107.89   17.50
   0  12   0   93.59    9.70
  -1 -12   0   62.99    5.00
  -1 -12   0   56.79   11.60
   1 -12   0   72.99   10.20
   1 -12   0   70.19   10.40
  -1 -12   0   73.39    7.60
  -1  12   0   53.09    9.70
  -1  12   0   70.49   17.90
   1  12   0   58.59   12.80
   1  12   0   69.59   18.90
   1  12   0   66.49    5.20
  -1  12   0   75.09   15.00
  -1  12   0   67.19   12.90
   1  12   0   61.69    7.40
  -2 -12   0  320.87   23.60
   2 -12   0  344.77   20.80
   2 -12   0  289.27   20.90
   2  12   0  220.38   21.10
  -2  12   0  276.17   21.50
  -2  12   0  343.07   27.50
   2  12   0  313.87   29.90
  -3 -12   0   66.39   12.20
  -3 -12   0   79.59   14.60
   3 -12   0   80.39   14.10
   3 -12   0   65.29   11.60
   3  12   0   82.19   14.10
   3  12   0   72.69   18.60
  -3  12   0   73.49   14.90
  -3  12   0   61.59   15.10
   4 -12   0   11.00    6.90
   4 -12   0   -4.50    5.10
  -4 -12   0   -0.40    4.00
  -4 -12   0    4.80    3.00
  -4 -12   0   -2.30    2.00
  -4 -12   0   10.30    3.20
  -4  12   0   12.60    8.90
   4  12   0    3.40    5.60
   4  12   0    1.60    2.50
  -4  12   0   13.20    9.40
   4  12   0    1.80    8.10
   4  12   0    0.10    4.80
   4  12   0    1.60    1.60
   5 -12   0   19.40    8.20
  -5 -12   0   26.20    6.30
  -5 -12   0   22.30    6.40
   5 -12   0   28.10   11.60
  -5 -12   0   20.50    7.80
   5  12   0    0.00    5.40
   5  12   0   22.00    7.40
  -5  12   0   13.00   10.40
   5  12   0   13.60   11.90
   5  12   0   19.90    5.30
   5  12   0   28.50    7.10
  -5  12   0   10.50   10.00
  -6 -12   0  822.12   41.80
  -6 -12   0  840.62   40.60
  -6 -12   0  762.82   39.80
   6 -12   0  825.32   51.39
   6  12   0  870.41   45.10
  -6  12   0  828.82   52.39
   6  12   0  787.52   56.09
   6  12   0  867.61   42.60
  -6  12   0  792.82   52.79
   6  12   0  867.51   39.50
   6  12   0  881.31   40.90
   7 -12   0  118.49   19.70
  -7 -12   0   81.19   15.40
   7 -12   0   82.89   19.90
  -7 -12   0  107.39   15.70
   7  12   0  101.69   15.60
   7  12   0   93.29   25.10
  -7  12   0   80.59   21.10
   7  12   0  123.29   18.40
  -7  12   0   86.69   22.10
  -8 -12   0  308.27   26.70
   8 -12   0  322.47   39.20
   8 -12   0  332.37   31.80
  -8  12   0  344.07   34.30
  -8  12   0  335.77   41.40
   8  12   0  402.16   51.39
  -9 -12   0  121.59   21.20
   9 -12   0  141.49   38.80
  -9  12   0  166.28   32.30
   9  12   0  166.88   37.20
  -9  12   0  144.99   26.70
 -10 -12   0    4.00    9.70
 -10  12   0   10.50   14.70
  10  12   0   21.00   17.20
 -11 -12   0   15.20   12.90
  11  12   0   10.80   17.90
 -12 -12   0   74.59   22.10
  12  12   0  105.99   34.90
 -13 -12   0   14.20   13.80
  13  12   0   -6.60   18.00
 -14 -12   0   14.10   18.90
  14  12   0   46.40   31.90
 -15 -12   0   11.70   18.50
  15  12   0    7.20   22.20
   0 -13   0    2.20    4.10
   0 -13   0   -2.40    3.90
   0 -13   0   -3.80    2.40
   0 -13   0   -0.30    2.60
   0  13   0    0.50    9.80
   0  13   0    0.40    3.00
   0  13   0    9.00    4.00
   0  13   0   -3.10    5.50
  -1 -13   0    2.70    3.30
  -1 -13   0    3.70    3.00
  -1 -13   0    1.30    1.80
   1 -13   0    0.10    2.90
   1 -13   0    2.70    3.80
  -1 -13   0    0.90    5.70
  -1  13   0   -4.40    3.00
   1  13   0    5.50    3.30
   1  13   0    1.80    2.20
  -1  13   0   -4.70    6.80
   1  13   0    0.50    8.40
   1  13   0   -2.20    5.60
  -1  13   0    5.90    4.90
  -1  13   0    7.30    7.10
   2 -13   0   18.30    6.70
  -2 -13   0   19.80    8.40
   2 -13   0   14.40    5.70
  -2  13   0   33.80    9.30
   2  13   0   16.00   10.60
   2  13   0   15.10    7.60
  -2  13   0   15.30    8.50
  -3 -13   0  232.68   22.20
   3 -13   0  234.58   18.90
  -3 -13   0  269.57   21.80
   3 -13   0  184.08   21.70
   3  13   0  212.58   20.20
  -3  13   0  244.58   25.30
   3  13   0  262.77   35.10
  -3  13   0  220.58   21.70
   4 -13   0  275.67   21.90
  -4 -13   0  185.18   23.00
   4 -13   0  221.28   22.00
  -4 -13   0  189.88   12.20
  -4 -13   0  193.18   11.90
   4  13   0  257.67   35.30
   4  13   0  217.78   19.80
  -4  13   0  243.98   29.90
   4  13   0  213.38   20.00
  -4  13   0  223.18   28.90
  -5 -13   0  189.88   15.10
  -5 -13   0  214.28   15.40
  -5 -13   0  236.78   13.90
   5 -13   0  226.08   27.50
  -5 -13   0  205.88   20.10
   5 -13   0  322.67   25.30
  -5  13   0  176.68   26.40
   5  13   0  215.68   20.60
   5  13   0  216.38   32.50
   5  13   0  203.58   20.20
   5  13   0  198.98   13.90
  -5  13   0  235.68   29.90
   5  13   0  219.28   13.40
  -6 -13   0  400.56   25.20
  -6 -13   0  437.46   28.30
   6 -13   0  438.86   31.60
   6 -13   0  386.96   34.40
  -6 -13   0  401.26   25.40
   6  13   0  417.46   23.50
  -6  13   0  440.96   36.80
   6  13   0  426.36   29.70
   6  13   0  386.66   24.00
  -6  13   0  414.96   35.70
   6  13   0  407.56   40.20
   6  13   0  369.96   27.00
  -7 -13   0   84.49   15.10
   7 -13   0   54.39   14.50
   7 -13   0   66.69   18.30
   7  13   0   52.29   19.90
  -7  13   0   79.19   21.50
   7  13   0   75.49   13.80
   7  13   0   89.29   17.20
  -7  13   0   41.70   16.90
   7  13   0   54.39   11.50
  -8 -13   0  282.77   25.30
   8 -13   0  366.46   32.70
   8 -13   0  265.07   35.90
   8  13   0  385.56   52.79
   8  13   0  316.47   26.10
  -8  13   0  274.17   36.60
  -8  13   0  369.56   46.20
  -9 -13   0   20.10   11.10
   9 -13   0   24.20   16.70
  -9  13   0   23.70   12.90
   9  13   0    2.60   14.20
  -9  13   0   44.90   16.80
 -10 -13   0    9.20   10.20
 -10  13   0   20.40   30.00
  10  13   0   41.90   23.20
 -10  13   0   22.40   17.70
 -11 -13   0   49.20   16.30
  11  13   0   57.59   27.30
 -12 -13   0    7.40   12.50
  12  13   0   11.40   21.80
 -13 -13   0  147.59   32.60
  13  13   0   39.80   33.80
 -14 -13   0   47.60   21.70
  14  13   0   33.20   31.70
 -15 -13   0  103.49   32.40
  15  13   0   70.59   38.70
   0 -14   0   93.49   10.60
   0 -14   0   70.59   10.10
   0 -14   0   84.09   10.30
   0 -14   0   98.59   11.80
   0  14   0   59.39   18.90
   0  14   0   77.09   15.60
   0  14   0   73.29   10.60
   0  14   0   80.89   10.40
  -1 -14   0   -0.70    2.70
   1 -14   0    0.00    3.70
   1 -14   0    4.70    4.40
  -1 -14   0   -3.80    2.80
  -1 -14   0    0.50    2.10
  -1 -14   0    9.10    6.10
  -1  14   0   -1.40    6.70
  -1  14   0    6.90    8.60
  -1  14   0    3.50    4.90
   1  14   0    3.00    2.60
   1  14   0    1.10    6.20
  -1  14   0    2.90    5.10
   1  14   0    3.00    3.50
   1  14   0  -14.10    7.80
  -2 -14   0  696.93   40.50
   2 -14   0  633.84   34.80
   2 -14   0  650.13   33.60
  -2  14   0  649.24   36.50
   2  14   0  612.54   47.20
  -2  14   0  617.74   41.70
   2  14   0  618.34   39.40
   3 -14   0    8.70    6.30
   3 -14   0   17.10    8.30
  -3 -14   0   14.60    7.20
  -3 -14   0    5.90    7.60
   3  14   0   10.30    6.40
  -3  14   0   26.00    9.90
  -3  14   0   20.90   10.60
   3  14   0   18.80   12.00
   4 -14   0 1715.63   75.29
   4 -14   0 1790.32   79.69
  -4 -14   0 1831.12   78.29
  -4 -14   0 1732.23   63.29
  -4 -14   0 1713.63   62.39
  -4  14   0 1663.63   80.69
  -4  14   0 1918.81   87.89
   4  14   0 1691.53   76.89
   4  14   0 1704.13   90.29
  -5 -14   0  142.79   11.60
  -5 -14   0  126.29   10.00
   5 -14   0  188.08   27.30
  -5 -14   0  157.98   20.20
   5 -14   0  123.59   19.10
  -5 -14   0  121.79   11.30
   5  14   0  141.19   19.20
   5  14   0  161.98   29.50
   5  14   0  141.49   19.60
  -5  14   0  171.28   28.10
  -5  14   0  117.29   22.40
  -6 -14   0 1415.36   64.49
  -6 -14   0 1360.96   58.99
   6 -14   0 1363.86   72.79
   6 -14   0 1396.06   67.79
  -6 -14   0 1377.66   55.79
  -6 -14   0 1373.46   58.49
   6  14   0 1325.17   54.39
  -6  14   0 1452.25   76.79
  -6  14   0 1395.16   74.89
   6  14   0 1292.07   79.99
   6  14   0 1398.96   64.29
   6  14   0 1358.86   55.69
   6  14   0 1464.95   66.39
  -7 -14   0  714.53   39.50
   7 -14   0  793.72   52.79
  -7  14   0  784.42   54.49
   7  14   0  726.63   38.10
  -7  14   0  694.33   51.89
   7  14   0  766.22   37.40
   7  14   0  719.43   58.09
  -8 -14   0  490.75   33.90
   8 -14   0  586.54   46.90
   8 -14   0  511.55   40.50
   8  14   0  492.45   49.10
  -8  14   0  501.85   44.90
  -8  14   0  471.95   43.30
   8  14   0  468.25   31.90
   9 -14   0  334.37   45.20
  -9 -14   0  294.57   27.60
  -9  14   0  333.07   45.40
   9  14   0  290.07   46.70
   9  14   0  292.97   27.60
  -9  14   0  305.77   39.40
 -10 -14   0   29.80   12.80
  10  14   0   72.99   18.60
  10  14   0   12.40   16.40
 -10  14   0    2.30   14.70
 -10  14   0   38.10   18.90
 -11 -14   0   27.50   14.40
  11  14   0   16.00   23.40
 -12 -14   0  100.29   26.00
  12  14   0   12.40   22.60
 -13 -14   0   -2.10   13.30
  13  14   0    2.10   20.40
 -14 -14   0  111.29   29.70
  14  14   0  123.49   44.30
 -15 -14   0   31.60   20.30
  15  14   0   16.90   29.10
  15  14   0    4.20   18.00
   0 -15   0    5.10    4.20
   0 -15   0    6.90    4.50
   0 -15   0    1.30    2.80
   0  15   0    0.50    3.30
   0  15   0    6.40    4.20
   0  15   0   -6.00    5.90
   0  15   0    5.10    9.90
   1 -15   0  594.24   30.40
  -1 -15   0  603.94   25.90
  -1 -15   0  589.14   26.50
  -1 -15   0  587.34   38.20
   1 -15   0  619.84   31.80
  -1 -15   0  633.94   28.10
  -1  15   0  618.04   47.40
   1  15   0  630.94   41.10
   1  15   0  560.44   47.80
   1  15   0  597.74   24.60
   1  15   0  547.05   26.40
  -1  15   0  609.04   32.50
  -1  15   0  608.14   41.70
  -1  15   0  649.54   33.70
   2 -15   0   69.89   12.90
  -2 -15   0   79.89   16.70
   2 -15   0   56.39   11.10
   2  15   0   64.89   15.40
  -2  15   0   74.89   13.50
   2  15   0  100.09   23.70
  -2  15   0   72.59   17.60
   3 -15   0 1530.25   64.99
  -3 -15   0 1516.25   71.49
   3 -15   0 1471.15   67.39
   3  15   0 1479.15   82.49
  -3  15   0 1404.06   74.39
  -3  15   0 1437.16   68.49
   4 -15   0  153.58   22.50
  -4 -15   0  135.59    9.20
  -4 -15   0  147.69   20.90
  -4 -15   0  161.38   23.50
   4 -15   0  133.39   19.00
  -4 -15   0  137.89    9.10
   4  15   0  183.88   32.90
  -4  15   0  181.98   27.40
  -4  15   0  124.49   22.90
   4  15   0  152.88   21.40
   5 -15   0 1343.27   68.69
  -5 -15   0 1319.17   49.60
   5 -15   0 1379.66   64.89
  -5 -15   0 1281.17   52.69
  -5 -15   0 1307.77   63.39
  -5 -15   0 1301.57   51.79
   5  15   0 1343.27   63.79
  -5  15   0 1303.17   72.69
  -5  15   0 1341.47   70.29
   5  15   0 1286.87   77.79
   5  15   0 1270.87   62.79
  -6 -15   0   49.30   10.40
  -6 -15   0   27.40   10.00
   6 -15   0   79.19   17.80
  -6 -15   0   49.20   10.20
  -6 -15   0   59.39    9.40
   6 -15   0   60.69   17.50
   6  15   0   53.89    8.40
  -6  15   0   69.79   19.30
   6  15   0   69.39    8.90
   6  15   0   55.19   13.70
   6  15   0   51.59   13.30
   6  15   0   37.30   17.80
  -6  15   0   65.59   18.10
   7 -15   0  555.74   41.40
   7 -15   0  625.94   47.60
  -7 -15   0  660.33   35.80
   7  15   0  620.94   32.40
   7  15   0  630.04   32.00
  -7  15   0  645.94   50.29
   7  15   0  611.24   53.39
  -7  15   0  661.13   50.09
  -8 -15   0  254.07   24.40
   8 -15   0  306.87   37.40
   8 -15   0  330.67   43.00
   8  15   0  265.57   22.80
  -8  15   0  252.37   37.00
   8  15   0  325.87   50.99
  -8  15   0  284.47   39.80
  -9 -15   0  222.38   28.30
   9 -15   0  285.57   42.30
  -9  15   0  214.68   33.30
   9  15   0  256.87   24.80
  -9  15   0  245.88   37.80
   9  15   0  202.88   42.60
 -10 -15   0  236.28   33.00
  10  15   0  214.68   43.30
 -10  15   0  290.97   40.90
 -10  15   0  271.97   43.80
  10  15   0  269.37   27.70
 -11 -15   0   21.20   14.30
  11  15   0    6.60   11.30
 -11  15   0   10.20   24.00
  11  15   0    5.50   18.80
 -12 -15   0    5.50   12.20
  12  15   0    8.70   19.70
  12  15   0    2.70   12.60
 -13 -15   0   29.10   16.80
  13  15   0   12.40   16.70
  13  15   0   17.30   26.40
 -14 -15   0    2.20   15.50
  14  15   0   63.59   24.50
  14  15   0   49.40   33.30
 -15 -15   0   31.20   20.60
  15  15   0   -7.00   17.20
  15  15   0   17.20   32.30
   0 -16   0  179.58   14.10
   0 -16   0  162.68   14.60
   0 -16   0  172.28   13.80
   0  16   0  231.38   37.30
   0  16   0  170.58   15.20
   0  16   0  178.98   14.10
   0  16   0  240.78   24.80
  -1 -16   0    6.70    4.40
  -1 -16   0    1.20    3.80
   1 -16   0    3.70    6.20
   1 -16   0    3.50    5.00
  -1 -16   0   16.50    6.80
   1  16   0   11.80    8.60
   1  16   0  -14.80    7.60
   1  16   0   16.30    3.70
   1  16   0    3.80    4.10
  -1  16   0   13.00   13.60
  -1  16   0   13.20    6.40
  -1  16   0    1.70    5.10
  -1  16   0   12.50    9.10
   2 -16   0   29.60    8.50
  -2 -16   0   28.50    4.10
  -2 -16   0   28.60   11.40
   2 -16   0   29.00    8.70
  -2 -16   0   26.70    5.00
  -2  16   0   37.70   10.90
   2  16   0   57.09   14.80
  -2  16   0   26.30   13.10
  -2  16   0   27.40   10.70
   2  16   0   57.49   20.60
   3 -16   0  193.48   23.20
   3 -16   0  163.08   19.60
  -3 -16   0  195.08   26.30
  -3  16   0  164.38   22.50
  -3  16   0  192.88   27.20
   3  16   0  205.68   33.90
  -4 -16   0   18.40    9.60
   4 -16   0   31.60   12.60
  -4 -16   0   30.80    5.30
   4 -16   0   21.40    8.50
  -4 -16   0   26.70    4.70
  -4 -16   0   38.40   13.00
  -4  16   0   26.50   12.50
  -4  16   0   18.80   12.70
   4  16   0   14.90    9.40
   4  16   0   33.80   16.20
  -5 -16   0  112.49    8.90
  -5 -16   0  102.69   10.10
   5 -16   0  135.29   20.70
   5 -16   0  101.69   19.70
  -5 -16   0  131.99   20.10
  -5 -16   0  120.69   10.80
   5  16   0  100.19   17.60
  -5  16   0  138.89   25.80
  -5  16   0  149.39   26.30
   5  16   0   99.39   26.00
   6 -16   0   49.40   16.30
  -6 -16   0   24.80    7.30
  -6 -16   0   46.10   12.50
  -6 -16   0   49.70    8.30
   6 -16   0   47.30   15.10
  -6 -16   0   43.50    8.60
  -6  16   0   40.10   14.60
  -6  16   0   42.40   15.60
   6  16   0   47.70   14.00
   6  16   0   30.60   16.90
   7 -16   0   31.90   15.10
   7 -16   0   17.00   11.20
  -7 -16   0   32.00    9.30
   7  16   0   21.50    7.10
   7  16   0   43.90    8.60
  -7  16   0   20.10   14.50
  -7  16   0   30.20   17.00
   7  16   0   35.80   20.00
   8 -16   0  140.09   26.30
  -8 -16   0  145.09   20.60
  -8  16   0  202.78   35.30
   8  16   0  122.29   31.20
   8  16   0  175.68   22.10
   8  16   0  136.29   18.10
  -8  16   0  150.58   29.30
   9 -16   0  215.88   31.70
  -9 -16   0  177.98   25.20
   9 -16   0  205.98   35.40
  -9  16   0  210.58   33.50
   9  16   0  208.88   25.20
  -9  16   0  223.78   37.40
   9  16   0  184.08   40.90
 -10 -16   0  123.09   22.70
 -10  16   0  140.99   32.10
  10  16   0  117.49   35.80
 -10  16   0   88.29   28.60
  10  16   0   98.79   19.60
 -11 -16   0   17.10   13.60
 -11  16   0   21.90   16.90
  11  16   0   29.90   23.40
  11  16   0   28.00   14.00
 -12 -16   0   -1.30   11.50
  12  16   0   17.70   20.70
  12  16   0   -0.10   10.90
 -13 -16   0   42.60   20.20
  13  16   0   47.80   32.10
  13  16   0   20.70   15.50
 -14 -16   0    2.80   16.00
  14  16   0   17.00   28.60
  14  16   0    4.50   14.50
 -15 -16   0  138.09   33.80
  15  16   0   73.79   24.60
  15  16   0   90.99   40.80
   0 -17   0   11.70    4.50
   0 -17   0   10.80    4.60
   0 -17   0    5.20    4.00
   0  17   0    0.10    7.10
   0  17   0   -7.90    9.10
   0  17   0    2.20    4.70
   0  17   0   10.90    4.70
  -1 -17   0  822.22   35.50
   1 -17   0  769.62   37.90
   1 -17   0  807.02   41.30
  -1 -17   0  822.92   49.20
   1 -17   0  745.93   38.80
  -1 -17   0  766.52   34.00
  -1 -17   0  776.42   33.70
  -1  17   0  801.62   52.09
  -1  17   0  780.62   39.80
  -1  17   0  804.92   41.00
   1  17   0  840.32   31.50
   1  17   0  736.73   58.59
  -1  17   0  726.33   55.99
   1  17   0  821.52   50.59
  -2 -17   0   12.00    4.40
  -2 -17   0   33.50   11.00
   2 -17   0   24.90    8.00
   2 -17   0   14.20    7.00
   2  17   0   43.80   13.40
   2  17   0   13.50   13.40
  -2  17   0   25.50    9.90
  -2  17   0   43.80   14.50
  -2  17   0   32.60   10.20
   3 -17   0  196.18   22.50
  -3 -17   0  231.48   29.90
   3 -17   0  225.98   26.50
   3  17   0  184.08   36.10
  -3  17   0  182.48   27.80
  -3  17   0  235.68   22.90
   4 -17   0   89.09   17.90
  -4 -17   0  108.19   19.70
  -4 -17   0  119.79    9.10
  -4 -17   0  111.99    7.70
   4 -17   0  100.19   16.80
  -4 -17   0  116.19   21.80
   4  17   0  167.58   34.20
  -4  17   0   97.69   19.90
  -4  17   0  103.39   21.80
   4  17   0  112.39   20.10
  -5 -17   0   47.00    8.00
  -5 -17   0   34.70    6.80
   5 -17   0   15.60   11.30
   5 -17   0   36.70   12.40
  -5 -17   0   37.80   12.50
  -5 -17   0   38.80    6.00
  -5  17   0   34.50   14.80
   5  17   0   27.30   17.80
   5  17   0   68.09   15.10
  -5  17   0   24.80   12.00
  -6 -17   0   12.60    6.10
  -6 -17   0   27.60    7.50
  -6 -17   0   17.70    6.00
  -6 -17   0   47.20   11.90
   6 -17   0   20.90   12.20
   6 -17   0   38.50   12.50
  -6  17   0   22.00   13.40
   6  17   0   22.20   18.60
   6  17   0   24.80   11.80
  -6  17   0   28.30   14.20
   7 -17   0  298.17   37.40
  -7 -17   0  287.17   22.30
   7 -17   0  330.87   37.60
   7  17   0  283.57   44.60
  -7  17   0  381.86   47.20
  -7  17   0  305.27   42.40
   8 -17   0   30.40   15.50
  -8 -17   0   15.70    9.40
   8 -17   0   17.90   10.40
   8  17   0   14.40    7.50
  -8  17   0    8.90   15.40
   8  17   0   10.80   15.20
   8  17   0    6.30    6.80
  -8  17   0   15.40   16.20
  -9 -17   0  519.35   37.00
   9 -17   0  576.24   52.19
   9 -17   0  515.55   44.60
   9  17   0  578.94   72.49
  -9  17   0  403.66   50.79
   9  17   0  503.45   32.10
  -9  17   0  544.35   50.69
 -10 -17   0   23.60   12.50
 -10  17   0   38.30   20.60
  10  17   0   20.00   20.70
  10  17   0   29.00   12.80
 -10  17   0  -12.90   21.30
 -11 -17   0   -4.60   11.40
 -11  17   0    6.00   15.20
  11  17   0   -2.50    9.50
  11  17   0   14.30   21.70
 -12 -17   0   50.79   18.80
  12  17   0   46.30   17.60
  12  17   0   46.30   28.50
 -13 -17   0   45.60   20.20
  13  17   0   59.39   21.80
  13  17   0   42.70   25.80
 -14 -17   0   51.79   24.20
  14  17   0    0.80   25.40
  14  17   0   45.50   20.50
  15  17   0   33.60   20.60
  15  17   0   -9.10   27.60
   0 -18   0  863.61   39.20
   0 -18   0  755.02   36.90
   0 -18   0  774.22   36.40
   0  18   0  826.52   52.59
   0  18   0  742.93   58.39
   0  18   0  834.92   39.50
   0  18   0  756.82   36.40
  -1 -18   0  149.79   11.40
   1 -18   0  152.18   18.40
   1 -18   0  121.89   15.60
  -1 -18   0  127.79   20.90
   1 -18   0  122.09   15.40
  -1 -18   0  139.09   12.90
  -1 -18   0  142.29   12.00
   1  18   0  174.98   26.50
   1  18   0  141.39    9.30
  -1  18   0  128.39   23.40
   1  18   0  152.48   33.20
  -1  18   0  135.19   18.10
  -1  18   0  151.88   15.90
  -1  18   0   76.49   23.30
  -2 -18   0  644.94   26.70
   2 -18   0  644.74   35.80
  -2 -18   0  625.14   27.50
   2 -18   0  598.64   36.60
  -2 -18   0  635.44   43.20
  -2 -18   0  632.94   29.10
   2  18   0  581.74   52.79
   2  18   0  688.33   45.90
  -2  18   0  678.63   38.60
  -2  18   0  584.54   37.40
  -2  18   0  625.54   46.40
   3 -18   0  412.56   31.20
   3 -18   0  474.85   30.00
  -3 -18   0  382.16   33.70
   3  18   0  428.96   44.10
  -3  18   0  368.96   35.60
   3  18   0  330.57   31.50
  -3  18   0  426.56   32.20
   4 -18   0  129.69   21.00
  -4 -18   0  125.39   22.00
  -4 -18   0   99.89    9.10
  -4 -18   0  113.49    7.90
   4 -18   0  133.69   18.90
  -4 -18   0  140.99   23.10
  -4  18   0  131.19   26.60
   4  18   0   89.89   18.80
   4  18   0   75.59   25.40
  -4  18   0  108.79   22.10
  -5 -18   0  111.79   11.90
  -5 -18   0  106.69    8.40
  -5 -18   0  116.99   20.60
   5 -18   0  104.59   20.90
   5 -18   0  139.39   22.10
  -5 -18   0  126.99   13.50
  -5  18   0  103.39   23.90
  -5  18   0  136.19   25.00
   5  18   0   90.89   17.80
   5  18   0   91.89   26.80
  -6 -18   0   14.10    6.10
   6 -18   0    7.20    8.70
  -6 -18   0   21.00    6.00
  -6 -18   0   14.20    6.40
  -6 -18   0   12.10    8.60
   6 -18   0   23.50   13.50
   6  18   0   13.30   10.60
  -6  18   0   13.80   12.70
   6  18   0   31.10   18.40
  -6  18   0    8.80   14.20
  -7 -18   0  524.25   30.90
   7 -18   0  483.35   39.20
   7 -18   0  501.05   44.40
  -7  18   0  543.95   49.50
   7  18   0  514.85   53.39
  -7  18   0  571.34   48.10
   8 -18   0   22.50   14.20
  -8 -18   0    4.60    8.30
   8 -18   0   29.70   15.90
  -8  18   0    6.40   12.30
   8  18   0   11.50   16.30
  -8  18   0  -10.80   14.40
   9 -18   0  416.66   51.59
  -9 -18   0  424.36   33.10
   9 -18   0  326.57   40.70
   9  18   0  463.75   65.79
  -9  18   0  408.56   50.49
   9  18   0  374.76   25.70
  -9  18   0  518.25   62.59
 -10 -18   0    3.70    9.00
 -10  18   0    5.00   13.40
  10  18   0   10.90   10.00
  10  18   0    2.50   20.20
 -10  18   0    1.70   24.40
 -11 -18   0  151.58   27.80
 -11  18   0  164.48   36.00
  11  18   0  200.18   50.79
  11  18   0  216.98   27.70
 -12 -18   0   34.10   17.50
  12  18   0   32.90   15.50
  12  18   0   52.49   29.10
 -13 -18   0   73.09   25.10
  13  18   0   75.39   37.40
  13  18   0   73.49   21.00
 -14 -18   0   15.60   17.60
  14  18   0   48.10   21.00
  14  18   0   -5.50   21.60
   0 -19   0   28.10    9.10
   0 -19   0   32.10    8.20
   0 -19   0   26.50    7.10
   0  19   0   43.30   18.60
   0  19   0   26.00    7.10
   0  19   0   46.40   15.40
   0  19   0   13.40    7.10
   1 -19   0 1816.12   76.19
  -1 -19   0 1767.12   88.09
  -1 -19   0 1870.21   71.89
  -1 -19   0 1817.62   69.89
   1 -19   0 1786.32   74.19
  -1 -19   0 1774.32   69.39
   1  19   0 1923.11   91.79
  -1  19   0 1857.11  101.09
  -1  19   0 1862.81   77.49
   1  19   0 1878.41  105.09
  -1  19   0 1777.22   75.49
  -1  19   0 1804.62   91.49
   2 -19   0  445.76   30.80
  -2 -19   0  503.45   37.40
   2 -19   0  411.66   28.30
  -2 -19   0  414.86   20.60
  -2 -19   0  410.46   21.60
  -2 -19   0  413.96   23.10
  -2  19   0  454.95   39.70
   2  19   0  459.85   47.30
  -2  19   0  460.05   31.30
   2  19   0  487.95   38.60
  -3 -19   0   62.89    7.20
  -3 -19   0   64.69   17.20
   3 -19   0   65.89   14.90
   3 -19   0   82.09   14.80
  -3  19   0   61.49   17.50
   3  19   0   64.29   16.30
   3  19   0   74.39   24.50
  -3  19   0   61.09   14.60
   4 -19   0    0.70    6.10
  -4 -19   0    8.20    7.80
  -4 -19   0    0.00    3.70
   4 -19   0    5.30    9.00
  -4 -19   0    5.90    8.70
  -4 -19   0    4.20    3.00
   4  19   0    1.40    9.20
   4  19   0   -4.00    7.70
  -4  19   0   -9.80   10.80
  -4  19   0    4.20    9.60
  -5 -19   0  537.75   40.00
   5 -19   0  583.64   40.20
  -5 -19   0  557.44   28.40
   5 -19   0  553.54   43.00
  -5 -19   0  599.54   27.30
  -5  19   0  599.64   44.90
  -5  19   0  634.34   49.90
   5  19   0  553.44   52.19
   5  19   0  578.34   42.00
   6 -19   0  579.04   41.70
  -6 -19   0  591.64   42.10
   6 -19   0  601.74   46.20
  -6 -19   0  572.54   30.90
  -6  19   0  582.04   49.20
   6  19   0  625.34   43.10
   6  19   0  587.84   54.79
  -6  19   0  580.94   47.60
   7 -19   0  363.96   46.10
  -7 -19   0  390.76   27.00
   7 -19   0  385.86   35.60
  -7  19   0  403.16   48.90
  -7  19   0  387.66   46.40
   7  19   0  427.56   59.19
   8 -19   0  683.03   50.89
  -8 -19   0  707.23   41.70
   8 -19   0  735.53   58.09
   8  19   0  610.54   62.39
  -8  19   0  727.63   58.39
  -8  19   0  728.23   59.89
   9 -19   0    2.30   10.50
  -9 -19   0   -1.30    8.70
   9 -19   0    3.20   16.60
  -9  19   0  -11.30   14.00
   9  19   0   -1.00   15.20
  -9  19   0   -9.00   13.50
 -10 -19   0  138.89   24.10
  10  19   0  122.49   38.40
  10  19   0  140.19   18.90
 -10  19   0  176.98   35.70
 -10  19   0  113.29   33.00
 -11 -19   0   15.10   11.70
  11  19   0    3.10    9.30
 -11  19   0   -4.90   18.40
 -11  19   0   10.30   21.50
  11  19   0   18.50   21.90
 -12 -19   0  102.99   23.70
  12  19   0   68.99   34.20
  12  19   0  109.09   21.70
 -13 -19   0    6.60   14.50
  13  19   0   -4.90   12.00
  13  19   0    3.20   27.20
 -14 -19   0   26.60   20.50
  14  19   0   -3.50   25.80
  14  19   0   -2.40   14.80
   0 -20   0 1895.31   75.79
   0 -20   0 2059.69   79.09
   0 -20   0 1904.51   77.39
   0  20   0 2028.60   78.89
   0  20   0 1764.02   94.69
   0  20   0 1843.42   74.69
   0  20   0 1919.21  106.39
  -1 -20   0   57.09   15.70
   1  20   0   81.29   19.00
  -1  20   0   92.89   25.00
  -1  20   0   54.19   12.10
  -1  20   0   57.99   12.40
   1  20   0   67.19   22.90
  -1  20   0   95.69   20.70
  -2 -20   0  659.23   31.50
  -2 -20   0  677.63   47.10
  -2 -20   0  611.44   29.50
   2 -20   0  610.24   36.50
   2 -20   0  644.34   39.30
  -2 -20   0  669.03   29.20
  -2  20   0  665.73   39.30
  -2  20   0  698.63   51.69
   2  20   0  683.83   59.29
   2  20   0  676.23   48.40
  -3 -20   0   20.60    4.90
   3 -20   0   13.50    8.80
  -3 -20   0    2.30    9.20
   3 -20   0    8.20    7.20
  -3 -20   0   17.90    4.90
   3  20   0   15.00   16.50
  -3  20   0    5.00    9.10
  -3  20   0    8.90   10.50
   3  20   0   15.90   10.40
  -4 -20   0    6.90    3.90
  -4 -20   0    6.50    8.40
  -4 -20   0   37.50   13.00
   4 -20   0   16.00   10.10
   4 -20   0   19.40    8.80
  -4 -20   0    8.20    3.40
  -4  20   0   19.20   11.50
   4  20   0   -5.90   13.40
   4  20   0   10.10    9.70
  -4  20   0   15.50   14.70
  -5 -20   0  278.97   28.30
   5 -20   0  239.88   33.50
  -5 -20   0  280.77   18.70
  -5 -20   0  274.37   17.60
   5 -20   0  299.47   32.50
   5  20   0  285.67   46.00
  -5  20   0  317.37   42.80
   5  20   0  292.77   30.80
  -5  20   0  305.87   38.30
   6 -20   0   58.09   16.40
   6 -20   0   78.99   20.20
  -6 -20   0   40.70    9.60
  -6 -20   0   31.10   14.20
   6  20   0   32.70   20.00
  -6  20   0   16.50   12.80
  -6  20   0   36.70   17.40
   6  20   0   42.50   23.20
   7 -20   0  143.09   27.10
  -7 -20   0  162.88   19.90
   7 -20   0   99.49   25.30
  -7  20   0  187.38   35.00
   7  20   0  167.18   38.70
  -7  20   0  102.29   26.70
  -8 -20   0  149.49   20.60
   8 -20   0  159.98   32.90
   8 -20   0  166.68   30.60
  -8  20   0  195.38   38.00
   8  20   0  164.08   40.70
  -8  20   0  137.69   33.30
   9 -20   0   -1.50   15.10
  -9 -20   0  -12.20    7.30
   9 -20   0   24.60   16.20
  -9  20   0   -7.70   14.20
   9  20   0  -11.90   16.20
  -9  20   0    4.70   11.50
 -10 -20   0  103.29   21.10
 -10  20   0   81.79   28.70
  10  20   0   61.79   28.20
 -10  20   0  113.79   35.20
 -11 -20   0    7.00   10.20
  11  20   0   18.80   21.40
  11  20   0   -2.60    8.30
 -11  20   0    8.30   16.00
 -11  20   0   38.30   25.80
 -12 -20   0   23.70   17.50
  12  20   0   14.50   23.30
  12  20   0   12.70   12.00
 -13 -20   0   -8.80   15.30
  13  20   0    7.90   13.90
  13  20   0   37.60   28.50
 -14 -20   0    4.80   17.10
  14  20   0   -0.30   12.70
  14  20   0  -10.80   22.50
   0 -21   0   60.19   10.80
   0 -21   0   62.49   17.70
   0  21   0   44.70   10.30
   0  21   0   79.59   24.20
   0  21   0   74.19   10.90
  -1 -21   0   38.10    9.00
   1 -21   0   49.80   11.20
   1 -21   0   54.49   11.00
  -1 -21   0   46.20    8.10
  -1 -21   0   36.80    9.20
  -1 -21   0   38.10   14.50
  -1 -21   0   64.49   11.10
   1  21   0   73.49   19.70
  -1  21   0   52.79   11.80
  -1  21   0   76.29   20.80
  -1  21   0   42.70   19.20
  -1  21   0   42.60   11.00
   1  21   0   90.79   28.90
  -2 -21   0   44.50    7.10
  -2 -21   0   38.70    7.20
   2 -21   0   36.80   10.30
  -2 -21   0   35.80    8.50
  -2 -21   0   27.40   12.70
   2 -21   0   35.70   11.40
  -2  21   0   47.30   18.50
  -2  21   0   53.09   13.50
   2  21   0   48.40   20.50
   2  21   0   71.09   19.30
  -3 -21   0   71.69   10.50
   3 -21   0   81.09   15.40
   3 -21   0   84.19   18.00
  -3 -21   0   89.49    9.60
  -3 -21   0   55.49   17.10
  -3 -21   0   44.10   14.90
  -3  21   0   67.39   16.10
  -3  21   0   46.20   17.70
   3  21   0   35.60   14.60
   3  21   0   33.60   20.30
   4 -21   0   88.69   19.80
  -4 -21   0   55.49   16.90
   4 -21   0   96.39   17.50
  -4 -21   0   82.89    9.70
  -4 -21   0  113.69   21.70
  -4 -21   0   88.59    9.80
   4  21   0  144.29   36.10
  -4  21   0  112.19   20.90
  -4  21   0  104.49   26.70
   5 -21   0  228.38   31.60
  -5 -21   0  252.47   16.60
  -5 -21   0  269.67   34.00
  -5 -21   0  249.97   17.20
   5 -21   0  258.67   30.70
   5  21   0  261.77   34.70
  -5  21   0  280.27   40.30
   5  21   0  270.17   47.00
  -5  21   0  240.88   33.90
   6 -21   0   39.10   14.30
   6 -21   0   37.90   15.90
  -6 -21   0    9.20    9.40
  -6 -21   0   33.40    9.60
   6  21   0   35.10   18.30
  -6  21   0   50.39   18.20
  -6  21   0   17.20   13.60
  -7 -21   0  495.35   31.20
   7 -21   0  518.25   42.20
   7 -21   0  562.24   47.90
  -7  21   0  547.45   51.59
   7  21   0  560.54   58.79
  -7  21   0  501.25   57.29
   8 -21   0   21.30   13.50
  -8 -21   0   11.60    9.70
   8 -21   0   -7.40   12.90
  -8  21   0   17.90   19.00
  -8  21   0   -3.40   17.70
   8  21   0   12.90   17.70
   9 -21   0  131.79   29.90
   9 -21   0  110.39   28.40
  -9 -21   0  134.49   22.10
  -9  21   0  142.49   33.10
  -9  21   0  158.78   37.50
   9  21   0   95.39   32.20
 -10 -21   0   72.69   18.70
  10  21   0  112.99   39.40
 -10  21   0  126.29   34.90
 -10  21   0   69.59   28.00
 -11 -21   0  -11.90    9.50
 -11  21   0   18.80   25.20
  11  21   0    7.40   21.20
 -11  21   0   -3.30   23.70
 -12 -21   0  116.09   25.90
  12  21   0  127.79   43.50
 -13 -21   0    4.70   16.20
  13  21   0   -7.50   11.00
  13  21   0   14.60   22.80
 -14 -21   0   63.99   22.70
  14  21   0   49.30   32.70
  14  21   0   22.40   15.80
   0 -22   0  564.54   32.90
   0 -22   0  541.15   45.40
   0 -22   0  570.84   32.00
   0  22   0  586.94   34.50
   0  22   0  626.34   55.69
   0  22   0  618.74   49.20
   0  22   0  594.04   30.60
  -1 -22   0  180.78   28.80
   1 -22   0  197.18   18.80
  -1 -22   0  188.28   15.50
  -1 -22   0  199.88   16.40
   1 -22   0  212.68   20.70
  -1  22   0  183.58   18.20
  -1  22   0  105.09   24.50
   1  22   0  179.28   39.50
  -1  22   0  188.28   37.80
   1  22   0  206.68   33.50
   2 -22   0  170.18   23.60
   2 -22   0  172.98   21.20
  -2 -22   0  186.78   14.20
  -2 -22   0  149.29   13.30
  -2 -22   0  198.58   31.00
  -2 -22   0  175.88   15.80
  -2  22   0  173.48   23.60
   2  22   0  191.68   40.50
  -2  22   0  208.48   32.90
   2  22   0  235.28   34.50
  -3 -22   0  880.31   37.90
  -3 -22   0  900.01   58.49
   3 -22   0  914.11   49.90
  -3 -22   0  919.01   41.00
  -3 -22   0  858.71   37.70
  -3 -22   0  851.51   57.49
   3 -22   0  935.71   53.49
   3  22   0  907.41   72.59
  -3  22   0  954.20   65.39
   3  22   0  993.50   61.79
  -3  22   0  884.81   52.19
  -4 -22   0   66.19    8.70
   4 -22   0   44.00   14.00
  -4 -22   0   65.29   21.20
  -4 -22   0   61.89    9.80
  -4 -22   0   24.60   13.10
   4 -22   0   63.09   17.40
  -4  22   0   60.49   20.90
   4  22   0   87.69   28.80
  -4  22   0   59.69   16.90
  -5 -22   0  501.75   41.10
   5 -22   0  433.76   36.30
  -5 -22   0  447.46   25.00
   5 -22   0  438.86   39.10
  -5 -22   0  486.05   24.20
   5  22   0  506.95   42.50
   5  22   0  511.15   54.39
  -5  22   0  419.46   43.40
  -5  22   0  465.85   40.50
   6 -22   0  110.19   22.00
   6 -22   0   91.99   22.10
  -6 -22   0  129.99   15.50
  -6 -22   0   85.69   30.30
  -6  22   0  127.39   26.70
   6  22   0  132.89   35.60
  -6  22   0  123.69   28.90
  -7 -22   0    3.10    6.20
   7 -22   0    5.60   12.20
   7 -22   0    9.00   10.30
  -7  22   0    4.20   20.10
   7  22   0    1.10   17.00
  -7  22   0  -10.00   10.40
   8 -22   0   -6.70   11.60
   8 -22   0    3.90    9.70
  -8 -22   0    3.50    8.00
  -8  22   0  -20.30   12.60
  -8  22   0   45.00   23.00
   8  22   0   -2.70   15.60
   9 -22   0   14.10   16.20
   9 -22   0   23.60   16.80
  -9 -22   0    4.30   10.30
  -9  22   0    2.90   17.60
  -9  22   0   25.40   21.40
   9  22   0   17.60   21.50
 -10 -22   0   28.40   14.20
 -10  22   0   17.70   18.90
  10  22   0   12.30   21.90
 -10  22   0   24.90   18.40
 -11 -22   0   52.59   19.00
 -11  22   0   94.69   38.90
  11  22   0   49.50   34.90
 -11  22   0   69.59   30.70
 -12 -22   0   56.29   18.20
  12  22   0   28.00   31.60
 -13 -22   0  209.48   34.60
  13  22   0  119.29   44.30
   0 -23   0   19.70    7.40
   0 -23   0   14.50    6.90
   0 -23   0   11.50   14.10
   0  23   0   33.40   14.10
   0  23   0   16.30    8.40
   0  23   0   25.00    7.90
   0  23   0   27.00   16.10
   1 -23   0  223.88   22.30
  -1 -23   0  218.38   17.60
  -1 -23   0  231.38   18.00
   1 -23   0  226.58   20.50
  -1 -23   0  243.28   35.10
  -1  23   0  232.88   20.80
   1  23   0  252.47   46.00
  -1  23   0  218.98   37.00
  -1  23   0  288.37   47.20
   1  23   0  266.77   39.30
   2 -23   0  564.04   39.10
  -2 -23   0  616.84   48.90
  -2 -23   0  623.44   33.90
  -2 -23   0  666.53   31.00
   2 -23   0  611.34   37.50
  -2 -23   0  575.34   30.10
  -2  23   0  712.33   54.79
   2  23   0  661.93   51.19
   2  23   0  636.84   62.29
  -2  23   0  609.54   39.00
  -3 -23   0  470.75   26.00
  -3 -23   0  448.26   23.70
  -3 -23   0  476.85   42.30
   3 -23   0  432.96   32.70
  -3 -23   0  426.76   40.30
  -3 -23   0  451.25   23.20
  -3 -23   0  450.45   22.00
   3 -23   0  445.06   35.90
  -3  23   0  419.56   43.40
   3  23   0  436.56   62.49
  -3  23   0  382.66   33.50
   3  23   0  458.85   42.70
  -4 -23   0  498.35   44.90
  -4 -23   0  453.35   24.50
  -4 -23   0  484.05   23.50
  -4 -23   0  395.36   38.60
   4 -23   0  471.65   38.80
   4 -23   0  436.56   34.40
  -4  23   0  458.55   45.30
  -4  23   0  468.25   40.50
   4  23   0  490.95   66.69
  -5 -23   0  351.96   42.00
   5 -23   0  373.26   37.10
   5 -23   0  330.77   37.80
  -5 -23   0  382.56   39.20
  -5 -23   0  393.36   22.50
  -5  23   0  457.25   39.70
  -5  23   0  427.96   44.60
   5  23   0  473.65   64.89
   5  23   0  369.76   43.50
   6 -23   0   87.59   23.40
   6 -23   0  102.89   21.80
  -6 -23   0  121.09   14.60
   6  23   0   84.79   30.60
  -6  23   0  155.28   29.30
  -6  23   0  129.09   31.10
   7 -23   0  226.08   36.90
   7 -23   0  275.57   35.40
  -7 -23   0  223.08   19.70
  -7  23   0  306.87   43.40
   7  23   0  235.58   46.60
  -7  23   0  220.68   40.90
  -8 -23   0    8.10    8.10
   8 -23   0   13.00   15.20
   8 -23   0   14.40   14.20
  -8  23   0   -7.20   21.20
  -8  23   0   -8.90   14.30
   8  23   0   -5.80   19.40
  -9 -23   0  129.19   21.80
   9 -23   0  122.69   29.70
   9 -23   0  122.59   31.20
   9  23   0  169.28   45.00
  -9  23   0  117.89   34.00
  -9  23   0  140.69   36.30
 -10 -23   0   11.50   12.20
  10  23   0    7.20   21.10
 -10  23   0   16.90   23.20
 -10  23   0   27.40   19.70
 -11 -23   0   -9.80   12.10
  11  23   0   15.60   21.80
 -11  23   0   22.50   27.20
 -11  23   0   17.20   29.90
 -12 -23   0   86.09   22.70
  12  23   0   28.00   28.10
 -13 -23   0   14.20   16.50
  13  23   0  -23.60   26.30
   0 -24   0   -4.50    6.30
   0 -24   0   21.10   12.40
   0 -24   0    2.40    5.10
   0  24   0   17.70   14.40
   0  24   0   14.10    6.90
   0  24   0   14.20    8.00
   0  24   0    2.70   13.80
  -1 -24   0  163.28   15.10
  -1 -24   0  145.89   30.10
  -1 -24   0  205.08   16.70
   1 -24   0  147.99   21.30
   1 -24   0  143.09   19.30
   1  24   0  211.08   43.20
  -1  24   0  160.28   30.60
   1  24   0  134.09   28.70
  -1  24   0  155.58   20.30
  -2 -24   0    2.00    5.00
   2 -24   0   25.30   10.60
   2 -24   0   17.20    8.50
  -2 -24   0   -1.00   10.30
  -2  24   0   25.20   15.60
   2  24   0   16.40   17.30
   2  24   0   18.20   13.60
  -2  24   0   20.30   10.80
  -3 -24   0  143.09   27.00
  -3 -24   0  142.49   14.40
  -3 -24   0  144.99   15.40
  -3 -24   0  127.39   26.00
   3 -24   0  175.08   23.40
   3 -24   0  123.49   22.10
   3  24   0  160.28   40.00
   3  24   0  135.69   27.90
  -3  24   0  102.09   25.50
  -3  24   0  133.49   23.10
  -4 -24   0   59.69   20.80
  -4 -24   0   77.59   13.00
  -4 -24   0   60.99   22.60
   4 -24   0   75.29   18.30
   4 -24   0   61.49   15.50
  -4 -24   0   92.79   11.00
  -4  24   0   74.99   20.30
   4  24   0   55.79   18.00
   4  24   0   74.99   28.60
  -4  24   0   96.99   25.70
  -5 -24   0   25.40    7.80
   5 -24   0   10.40   11.50
   5 -24   0   14.50   12.00
  -5 -24   0   34.50   16.50
  -5  24   0   37.00   20.00
   5  24   0   55.49   27.20
  -5  24   0   40.70   17.00
   5  24   0    5.50   12.10
  -6 -24   0   45.10   10.70
   6 -24   0   41.50   16.40
   6 -24   0   14.90   13.80
  -6  24   0   33.70   15.60
   6  24   0   29.10   20.70
  -6  24   0   44.60   19.70
   7 -24   0   22.10   17.20
  -7 -24   0   -1.90    6.00
   7 -24   0   19.70   11.40
  -7  24   0   -3.30   12.10
  -7  24   0   17.60   18.70
   7  24   0   -3.10   19.50
   8 -24   0  165.18   33.80
   8 -24   0  163.58   31.50
  -8 -24   0  161.68   21.10
  -8  24   0  186.58   37.70
  -8  24   0  151.78   39.40
   8  24   0  112.79   35.80
   9 -24   0  169.38   36.00
   9 -24   0  131.59   30.60
  -9 -24   0  140.59   22.40
  -9  24   0  159.68   40.70
  -9  24   0   78.79   28.80
   9  24   0  139.49   43.40
 -10 -24   0   35.10   13.50
  10 -24   0   44.00   29.20
 -10  24   0   40.90   19.10
 -10  24   0   33.50   23.10
  10  24   0    8.80   23.30
 -11 -24   0   72.59   20.40
 -11  24   0   71.39   37.20
  11  24   0   17.30   29.00
 -11  24   0   36.70   27.30
 -12 -24   0   -0.70   13.90
 -12  24   0   36.80   29.70
  12  24   0   33.90   30.50
 -13 -24   0    1.80   16.20
  13  24   0   22.20   33.00
   0 -25   0   -1.10    7.80
   0 -25   0    3.40    6.20
   0 -25   0    1.90    9.50
   0  25   0   -5.20   12.80
   0  25   0    1.90    6.00
   0  25   0    8.30    8.50
   0  25   0    8.30   13.30
  -1 -25   0   24.80    8.20
   1 -25   0   28.70    9.30
  -1 -25   0   19.20   14.30
  -1 -25   0   32.40    8.30
   1 -25   0   25.60    8.80
   1  25   0   32.30   21.70
  -1  25   0   44.40   11.50
   1  25   0   28.30   17.10
  -1  25   0   35.90   15.50
  -2 -25   0   19.00    6.70
   2 -25   0   27.70   11.00
   2 -25   0   26.30   10.80
  -2 -25   0   25.40    7.30
  -2  25   0   19.80   16.30
  -2  25   0    8.10    9.60
   2  25   0   62.69   28.70
   2  25   0   17.40   16.10
  -3 -25   0  176.48   15.00
  -3 -25   0  139.89   29.20
  -3 -25   0  144.39   14.90
   3 -25   0  134.59   23.80
  -3 -25   0  227.48   36.60
   3 -25   0  150.88   23.30
  -3  25   0  166.38   27.00
   3  25   0  156.18   40.90
   3  25   0  232.88   37.00
  -3  25   0  224.88   39.40
  -4 -25   0   26.40    6.90
  -4 -25   0   17.70    7.30
  -4 -25   0   15.90   13.70
   4 -25   0   24.00   12.50
   4 -25   0   29.90   12.20
  -4 -25   0   -5.30   14.90
   4  25   0   23.20   22.70
  -4  25   0   27.30   18.70
  -4  25   0   37.40   14.00
   4  25   0   14.70   14.80
  -5 -25   0  257.47   18.70
   5 -25   0  286.37   39.30
  -5 -25   0  275.17   39.20
   5 -25   0  276.97   34.50
  -5  25   0  284.47   38.60
  -5  25   0  325.17   50.39
   5  25   0  240.68   38.50
   5  25   0  242.88   50.39
   6 -25   0   42.20   16.20
  -6 -25   0   15.30    7.20
   6 -25   0   24.60   14.80
  -6  25   0   22.70   17.70
  -6  25   0   35.80   17.30
   6  25   0   11.40   21.20
   7 -25   0   56.09   17.60
  -7 -25   0   32.80   10.40
   7 -25   0   31.70   18.30
  -7  25   0   56.89   26.10
  -7  25   0   65.09   22.40
   7  25   0   25.60   24.10
  -8 -25   0   23.70    8.70
   8 -25   0    3.90   12.40
   8 -25   0    0.80   14.00
  -8  25   0    2.70   21.80
  -8  25   0   -1.50   16.70
   8  25   0   -8.90   18.70
   9 -25   0   -3.00   15.50
   9 -25   0   22.60   17.90
  -9 -25   0   16.40   11.00
   9  25   0  -13.00   19.40
  -9  25   0   20.30   24.80
  -9  25   0   24.70   23.10
 -10 -25   0  260.67   31.80
  10 -25   0  204.58   44.70
 -10  25   0  283.77   51.19
  10  25   0  222.48   56.59
 -10  25   0  307.17   52.29
 -11 -25   0   -0.10   13.10
  11  25   0   -0.40   24.10
 -11  25   0   -7.10   24.50
 -11  25   0   16.00   31.30
 -12 -25   0   24.60   18.20
  12  25   0   -5.40   22.40
 -12  25   0   15.30   22.80
   0 -26   0  305.67   42.50
   0 -26   0  317.17   25.90
   0 -26   0  298.87   24.00
   0  26   0  342.57   57.99
   0  26   0  345.67   48.00
   0  26   0  280.57   20.00
   0  26   0  317.37   23.80
   1 -26   0   21.10    9.00
  -1 -26   0   25.10    8.50
   1 -26   0   13.80    9.10
  -1 -26   0   10.20   12.30
  -1 -26   0   13.10    7.80
  -1  26   0   16.20   15.90
   1  26   0   -1.40   14.10
   1  26   0   13.40   17.00
  -1  26   0   16.70    9.60
   2 -26   0   21.10   11.30
  -2 -26   0   17.20    7.10
   2 -26   0   11.10    8.20
  -2 -26   0   -8.60    9.40
  -2 -26   0   34.80    8.70
   2  26   0   16.10   18.50
   2  26   0   13.30   17.20
  -2  26   0   28.30   11.10
  -2  26   0   38.80   19.40
  -3 -26   0   11.70    5.60
  -3 -26   0   -1.00   10.60
   3 -26   0   11.10   10.40
   3 -26   0   -1.70    7.10
  -3 -26   0   14.00    5.90
  -3 -26   0   18.60   16.10
  -3  26   0   22.60   13.20
   3  26   0    8.20   21.00
   3  26   0   24.20   16.90
  -3  26   0   38.30   21.10
  -4 -26   0  131.99   14.80
  -4 -26   0  112.99   28.90
  -4 -26   0  118.19   13.20
  -4 -26   0  121.89   26.60
   4 -26   0  123.09   21.90
   4 -26   0  109.49   22.70
  -4  26   0  154.88   34.20
   4  26   0  139.29   29.40
   4  26   0   88.99   33.20
  -4  26   0  122.19   23.30
  -5 -26   0  198.58   16.50
  -5 -26   0  198.78   34.10
   5 -26   0  195.38   29.20
   5 -26   0  173.38   30.70
  -5  26   0  187.28   39.00
  -5  26   0  166.98   29.90
   5  26   0  190.98   35.10
   5  26   0  139.19   41.50
  -6 -26   0  282.57   21.10
   6 -26   0  284.07   41.30
   6 -26   0  216.78   32.80
  -6  26   0  196.08   34.10
   6  26   0  270.17   53.59
  -6  26   0  295.57   47.60
   7 -26   0   67.29   23.00
   7 -26   0   54.49   19.90
  -7 -26   0   51.79   13.40
  -7  26   0   87.19   30.00
  -7  26   0   32.30   19.40
   7  26   0   21.40   26.50
  -8 -26   0   18.30    7.10
   8 -26   0   -1.90   13.40
   8 -26   0   -1.10   14.00
  -8  26   0    9.80   20.60
  -8  26   0   -1.10   22.60
   8  26   0    4.80   21.10
   9 -26   0   -7.70   14.00
  -9 -26   0   -8.40    7.50
   9 -26   0   11.40   17.40
  -9  26   0   25.70   21.30
  -9  26   0  -13.30   19.70
   9  26   0   -5.50   19.00
 -10 -26   0   85.69   19.50
  10 -26   0   77.29   30.10
  10  26   0   50.29   31.90
 -10  26   0   80.29   32.80
 -10  26   0   74.39   31.00
 -11 -26   0   -4.10   12.60
 -11  26   0   -7.50   27.20
 -11  26   0  -16.50   20.40
  11  26   0  -11.50   24.50
 -12 -26   0   85.89   23.40
 -12  26   0   57.99   37.20
  12  26   0  138.19   48.80
 -12  26   0  118.99   55.59
   0 -27   0    5.00    8.20
   0 -27   0   29.90   10.20
   0  27   0   14.20   22.50
   0  27   0   26.50   17.80
   0  27   0   14.80    7.00
   0  27   0   19.50    8.60
   1 -27   0  302.97   26.20
  -1 -27   0  300.87   23.40
  -1 -27   0  281.97   24.60
   1 -27   0  335.97   29.10
  -1 -27   0  337.87   46.10
   1  27   0  385.26   60.09
  -1  27   0  314.77   45.90
  -1  27   0  327.27   25.90
   1  27   0  308.17   44.60
  -2 -27   0  -21.20    8.70
  -2 -27   0   -2.20    5.00
   2 -27   0   -9.70    5.80
   2 -27   0   29.50   10.90
  -2 -27   0    6.40    6.00
  -2  27   0    4.80    9.10
   2  27   0   12.90   16.70
   2  27   0   29.40   24.30
  -2  27   0    4.40   14.00
  -3 -27   0  -14.40   12.00
  -3 -27   0   11.00    6.00
   3 -27   0   -1.10   10.20
  -3 -27   0  -13.50   15.90
  -3 -27   0   14.00    5.90
   3 -27   0   -7.60    6.90
  -3  27   0    2.30   10.00
   3  27   0   -6.80   12.90
   3  27   0    5.80   20.80
  -3  27   0    4.70   14.50
   4 -27   0   52.69   18.10
   4 -27   0   84.99   19.30
  -4 -27   0   56.09   19.20
  -4 -27   0   46.50    8.70
  -4 -27   0   51.29   10.00
   4  27   0   40.40   20.40
  -4  27   0   26.90   14.50
  -4  27   0   85.39   26.40
   4  27   0   42.90   25.90
   5 -27   0   90.59   22.10
  -5 -27   0   83.49   12.80
  -5 -27   0  128.29   27.90
  -5 -27   0   96.69   12.40
   5 -27   0   88.39   22.10
  -5  27   0   84.19   28.00
  -5  27   0   90.29   24.60
   5  27   0   60.19   33.50
   6 -27   0   63.59   23.30
   6 -27   0   33.20   17.50
  -6 -27   0   49.00   11.60
   6  27   0   59.49   34.10
  -6  27   0   66.39   22.50
  -6  27   0   49.99   19.90
   7 -27   0   56.69   19.00
   7 -27   0   57.19   22.90
  -7 -27   0   50.89   11.90
  -7  27   0   61.49   23.70
  -7  27   0   23.70   20.20
   7  27   0   12.80   18.80
   8 -27   0  131.29   31.80
  -8 -27   0  144.49   20.50
   8 -27   0  129.79   30.10
  -8  27   0  139.39   39.90
   8  27   0  109.69   39.80
  -8  27   0  179.68   43.30
   9 -27   0  131.29   32.30
   9 -27   0  228.28   44.10
  -9 -27   0  182.28   24.30
  -9  27   0  203.48   44.20
  -9  27   0  225.48   46.00
   9  27   0  134.09   43.80
  10 -27   0  156.38   38.90
 -10 -27   0  179.28   25.90
 -10  27   0  141.49   42.70
  10  27   0  133.99   45.80
 -10  27   0  167.38   43.80
 -11 -27   0  255.27   34.10
 -11  27   0  328.07   61.59
  11  27   0  286.47   65.59
 -11  27   0  260.37   52.79
 -12 -27   0  191.88   34.10
  12  27   0   98.99   42.50
 -12  27   0  255.17   65.09
 -12  27   0  179.88   54.99
   0 -28   0  108.49   18.70
   0 -28   0   99.99   16.30
   0  28   0  117.99   38.00
   0  28   0  125.79   33.00
  -1 -28   0   11.90    7.50
  -1 -28   0    7.80    6.50
   1 -28   0   -9.20    7.00
  -1  28   0   10.10   17.10
   1  28   0   36.50   22.80
   1  28   0   17.00   17.60
  -1  28   0   10.10    9.50
   2 -28   0  133.29   22.30
  -2 -28   0  122.19   16.60
   2 -28   0  101.49   18.90
  -2 -28   0  108.29   14.70
  -2  28   0  114.79   20.60
   2  28   0  107.09   34.50
  -2  28   0  108.59   29.40
   2  28   0   99.39   28.80
  -3 -28   0   30.20   16.10
  -3 -28   0   32.80    7.00
  -3 -28   0   -0.30   16.20
   3 -28   0    4.00    8.60
   3 -28   0   14.60   12.40
  -3 -28   0   14.00    6.20
   3  28   0   -0.40   15.90
   3  28   0    3.40   20.00
  -3  28   0   16.40   11.80
  -3  28   0   12.70   19.90
   4 -28   0   51.09   18.60
  -4 -28   0   69.99   23.30
   4 -28   0   44.00   15.20
  -4 -28   0   53.79    9.60
  -4 -28   0   59.19   11.10
   4  28   0   62.79   24.30
   4  28   0   21.50   21.80
  -4  28   0   20.30   19.40
  -4  28   0   59.59   19.20
  -5 -28   0   85.99   12.30
   5 -28   0   67.29   20.60
   5 -28   0   54.49   20.70
  -5 -28   0   92.89   25.30
  -5 -28   0   89.29   12.60
  -5  28   0   82.69   24.90
  -5  28   0  104.09   32.10
   5  28   0  107.49   38.30
  -6 -28   0   13.70    7.80
   6 -28   0   36.00   17.90
   6 -28   0   48.80   19.10
   6  28   0   24.70   29.70
  -6  28   0   -3.90   13.10
  -6  28   0   21.00   15.70
   7 -28   0  125.09   29.40
   7 -28   0  187.58   33.90
  -7 -28   0  192.18   19.10
   7  28   0  201.68   54.09
  -7  28   0  190.28   38.80
  -7  28   0  234.08   44.10
   8 -28   0   -1.90   14.50
  -8 -28   0   11.20    9.50
   8 -28   0    9.50   15.90
  -8  28   0   27.40   25.50
   8  28   0  -12.00   20.30
  -8  28   0   21.70   24.50
  -9 -28   0  327.37   29.10
   9 -28   0  278.47   43.50
   9 -28   0  318.57   50.39
   9  28   0  230.18   57.99
  -9  28   0  228.88   47.60
  -9  28   0  226.98   46.70
 -10 -28   0   21.20   11.30
  10 -28   0   78.49   31.90
 -10  28   0   33.40   30.70
  10  28   0    4.60   27.70
 -10  28   0   41.40   24.90
 -11 -28   0  268.87   34.70
 -11  28   0  290.87   52.99
 -11  28   0  245.78   52.39
  11  28   0  263.27   66.79
   0 -29   0   25.70   10.20
   0 -29   0   12.20    8.50
   0  29   0    7.10   21.80
   0  29   0    1.30   13.40
  -1 -29   0  628.54   37.90
   1 -29   0  647.14   42.30
  -1 -29   0  610.64   35.90
   1 -29   0  618.24   39.80
   1  29   0  519.15   55.29
  -1  29   0  637.24   37.20
  -1  29   0  638.54   59.99
   1  29   0  624.14   79.89
   2 -29   0  159.68   24.00
  -2 -29   0  209.88   40.00
  -2 -29   0  189.68   18.80
  -2 -29   0  194.48   20.90
   2 -29   0  183.68   28.70
  -2  29   0  137.29   34.30
  -2  29   0  163.28   24.30
   2  29   0  197.08   37.80
   2  29   0  210.78   49.50
  -3 -29   0  235.68   18.00
  -3 -29   0  264.17   42.30
   3 -29   0  235.68   33.10
   3 -29   0  189.48   27.40
  -3 -29   0  191.38   17.40
  -3  29   0  254.37   45.40
   3  29   0  197.48   49.40
  -3  29   0  202.38   29.80
   3  29   0  218.68   40.60
  -4 -29   0  292.17   21.10
  -4 -29   0  285.27   19.60
  -4 -29   0  356.76   48.00
   4 -29   0  305.07   36.80
   4 -29   0  366.86   43.80
   4  29   0  158.98   45.20
   4  29   0  284.87   45.60
  -4  29   0  383.66   57.39
  -4  29   0  305.77   39.80
  -5 -29   0    4.50   22.20
  -5 -29   0   19.50    8.90
   5 -29   0   -2.10   11.60
  -5 -29   0   32.20    8.60
   5 -29   0   17.90   13.10
   5  29   0  -15.90   21.40
  -5  29   0   20.20   15.20
  -5  29   0   10.40   18.40
   6 -29   0   15.40   15.70
  -6 -29   0   23.40   10.40
  -6 -29   0   33.60    9.30
   6 -29   0   12.80   15.20
  -6  29   0   52.69   19.50
  -6  29   0   36.00   25.30
   6  29   0   70.89   36.60
   7 -29   0    4.60   14.50
  -7 -29   0   29.60    9.80
   7 -29   0   32.00   17.10
  -7  29   0   20.00   14.00
  -7  29   0   48.50   21.90
   7  29   0   33.70   31.00
  -8 -29   0    8.00    8.70
   8 -29   0   -3.60   15.70
   8 -29   0   28.10   20.10
  -8  29   0   27.40   17.80
   8  29   0  -17.70   23.30
  -8  29   0    1.30   21.80
  -9 -29   0   92.29   19.00
   9 -29   0   79.19   28.30
   9 -29   0  129.59   32.50
  -9  29   0  136.39   44.20
   9  29   0   67.59   35.00
  -9  29   0   99.09   32.30
  10 -29   0   32.00   22.90
  10 -29   0   -9.40   17.00
 -10 -29   0    8.50   12.10
 -10  29   0  -13.40   21.70
 -10  29   0   21.00   25.70
  10  29   0    4.00   28.50
 -11 -29   0    1.60   10.60
  11  29   0   10.90   31.50
 -11  29   0   18.80   25.30
   0 -30   0   10.40   10.70
   0 -30   0    7.80    7.40
   0  30   0   11.00   20.40
   0  30   0    9.80   17.40
   1 -30   0   89.89   17.90
  -1 -30   0   76.69   14.50
   1 -30   0   85.69   18.50
  -1 -30   0   78.19   16.50
  -1  30   0   77.39   15.70
  -1  30   0  103.99   31.00
   1  30   0   84.49   28.70
   1  30   0   96.99   34.40
  -2 -30   0   62.59   12.90
   2 -30   0   42.80   17.00
   2 -30   0   57.69   15.40
  -2 -30   0   50.89   13.20
  -2 -30   0   36.20   21.40
  -2  30   0   70.09   27.50
  -2  30   0   60.39   16.00
   2  30   0   55.69   29.30
   2  30   0   57.29   23.20
  -3 -30   0  324.67   22.70
   3 -30   0  312.67   38.80
  -3 -30   0  349.57   49.80
  -3 -30   0  321.97   23.80
   3 -30   0  344.67   32.10
  -3  30   0  288.27   35.60
   3  30   0  293.87   47.50
  -3  30   0  249.18   46.60
   3  30   0  229.48   54.89
  -4 -30   0   11.70    7.20
   4 -30   0  -10.60    8.80
  -4 -30   0    8.10    7.00
   4 -30   0   13.20   12.70
  -4 -30   0   -7.10   15.40
   4  30   0    9.90   17.30
   4  30   0   -6.10   23.60
  -4  30   0   21.70   21.30
  -4  30   0   24.80   15.90
   5 -30   0   89.79   24.80
  -5 -30   0  121.29   16.50
   5 -30   0   99.49   23.80
  -5 -30   0  111.69   14.20
  -5  30   0  141.39   27.70
   5  30   0  114.79   40.70
  -5  30   0  149.19   33.60
   6 -30   0   24.60   16.40
   6 -30   0   11.50   14.30
  -6 -30   0   41.10    7.90
  -6 -30   0   33.70   11.50
  -6  30   0   24.80   19.60
   6  30   0   12.40   29.20
  -6  30   0    5.00   13.10
   7 -30   0  138.19   30.20
  -7 -30   0  140.59   18.90
   7 -30   0  145.59   34.10
  -7  30   0  123.79   33.90
   7  30   0   93.49   41.50
  -7  30   0   93.59   26.90
  -8 -30   0   18.10   10.30
   8 -30   0   40.30   21.40
   8 -30   0   27.70   18.40
  -8  30   0   50.19   23.20
   8  30   0   35.30   33.60
  -8  30   0   20.00   22.00
  -9 -30   0  367.06   30.70
   9 -30   0  318.27   48.30
   9 -30   0  417.06   59.79
  -9  30   0  360.66   59.69
   9  30   0  333.67   64.69
  -9  30   0  399.26   65.79
  10 -30   0   14.00   21.60
  10 -30   0   -0.60   19.30
 -10 -30   0   -9.20    9.60
  10  30   0   38.10   34.60
 -10  30   0    6.40   28.70
 -11  30   0   15.10   23.40
   0 -31   0    0.90    7.30
   0 -31   0    0.40   10.30
   0  31   0    2.10   15.50
   0  31   0   28.80   27.70
  -1 -31   0  243.68   23.50
   1 -31   0  295.67   34.30
   1 -31   0  285.27   32.20
  -1 -31   0  340.87   28.30
   1  31   0  307.67   58.29
  -1  31   0  317.27   24.50
  -1  31   0  316.97   52.59
   1  31   0  271.57   48.90
  -2 -31   0   15.60   17.00
  -2 -31   0   25.30    9.20
  -2 -31   0   13.40    8.50
   2 -31   0   -2.80   12.70
   2 -31   0   20.90   11.10
   2  31   0   14.80   19.30
   2  31   0   27.60   25.60
  -2  31   0   -0.60   18.30
  -2  31   0    6.50   11.00
  -3 -31   0   95.89   14.60
  -3 -31   0  124.49   16.70
   3 -31   0   78.69   20.00
  -3 -31   0   82.49   27.70
   3 -31   0   91.19   22.70
   3  31   0   62.49   26.30
  -3  31   0   85.69   21.70
  -3  31   0   63.39   28.70
   3  31   0   61.39   35.50
   4 -31   0   19.30   14.10
  -4 -31   0   18.60    8.30
   4 -31   0    8.80   11.30
  -4 -31   0   12.70    8.00
  -4 -31   0  -43.00   13.70
  -4  31   0   26.90   21.30
  -4  31   0   12.70   14.20
   4  31   0   23.80   20.90
   4  31   0    0.90   24.30
  -5 -31   0    0.70    5.50
   5 -31   0    9.90   13.80
  -5 -31   0    4.90    7.10
   5 -31   0    3.40   11.60
  -5  31   0   57.29   26.10
   5  31   0   15.20   24.80
  -5  31   0   -6.50   11.60
  -6 -31   0   37.70    8.80
   6 -31   0   28.70   17.10
  -6 -31   0   10.20    9.30
   6 -31   0   32.80   19.00
  -6  31   0   32.50   22.50
  -6  31   0   39.60   19.90
   6  31   0   46.40   34.10
   7 -31   0    1.00   13.30
   7 -31   0   17.90   17.40
  -7 -31   0   32.70    9.70
  -7 -31   0   14.40    7.70
  -7  31   0   25.10   16.40
  -7  31   0    0.10   20.50
   7  31   0    9.20   27.20
  -8 -31   0  288.67   25.60
   8 -31   0  294.27   48.80
   8 -31   0  298.47   45.40
  -8  31   0  269.47   51.59
   8  31   0  327.97   71.69
  -8  31   0  299.87   50.19
  -9 -31   0   20.20   10.50
   9 -31   0    1.90   15.80
   9 -31   0   24.40   20.80
  -9  31   0  -43.10   28.30
  -9  31   0   -0.20   30.50
   9  31   0   -7.50   28.30
 -10 -31   0  133.59   22.00
  10 -31   0  175.18   40.70
  10 -31   0   62.69   32.30
  10  31   0   72.59   38.60
 -10  31   0   53.89   29.60
   0 -32   0   14.40   13.00
   0 -32   0   26.70   10.50
   0  32   0   36.90   23.60
  -1 -32   0   43.70   12.80
   1 -32   0   50.89   15.60
  -1 -32   0  102.09   17.90
   1 -32   0   26.20   13.80
   1  32   0   53.09   32.20
   1  32   0   39.90   24.10
  -1  32   0   50.79   23.90
  -1  32   0   40.10   11.40
   2 -32   0   47.40   15.40
  -2 -32   0   -5.40   13.90
  -2 -32   0   20.50   10.10
   2 -32   0   30.50   12.20
  -2 -32   0    7.20    8.70
  -2  32   0   25.30   12.40
   2  32   0   36.50   22.30
   2  32   0   26.60   24.80
  -2  32   0   -9.50   18.30
   3 -32   0  218.38   32.00
   3 -32   0  215.08   35.40
  -3 -32   0  184.18   37.20
  -3 -32   0  207.58   23.40
  -3 -32   0  205.58   19.50
   3  32   0  181.28   40.80
  -3  32   0  244.78   48.90
  -3  32   0  218.48   31.50
   3  32   0  176.98   49.80
  -4 -32   0  -11.00   19.30
   4 -32   0   32.20   15.50
  -4 -32   0   28.70   10.10
   4 -32   0   26.70   14.90
  -4 -32   0   15.70    9.50
   4  32   0   41.90   33.50
   4  32   0   84.29   44.70
  -4  32   0    4.70   14.20
  -4  32   0   19.00   23.90
  -5 -32   0   88.99   12.80
   5 -32   0   99.19   27.10
  -5 -32   0  101.19   16.50
   5 -32   0  121.79   27.60
  -5  32   0   34.70   27.40
  -5  32   0  122.79   28.60
   5  32   0   77.19   40.00
   6 -32   0    8.60   14.00
  -6 -32   0    5.40    6.00
   6 -32   0    2.40   14.80
  -6 -32   0    1.80    8.50
  -6  32   0   -8.30   24.70
   6  32   0    2.00   29.70
  -6  32   0    8.30   17.20
   7 -32   0  140.39   35.30
  -7 -32   0  141.79   17.60
  -7 -32   0  124.79   17.00
   7 -32   0   93.79   26.40
  -7  32   0   92.49   29.50
  -7  32   0  147.99   41.90
   7  32   0  106.99   44.60
  -8 -32   0   10.60    9.50
   8 -32   0   20.40   20.20
  -8 -32   0    8.60    7.90
   8 -32   0  -13.70   14.00
  -8  32   0   38.30   37.60
  -8  32   0   13.80   19.10
   8  32   0   -0.80   31.00
   9 -32   0   71.49   26.50
  -9 -32   0   96.99   18.90
   9 -32   0  112.59   32.70
   9  32   0   78.99   47.30
  -9  32   0   85.69   34.90
   0 -33   0   14.70    9.00
   0 -33   0   37.30   14.70
   0  33   0   15.20   20.80
  -1 -33   0  279.27   33.20
   1 -33   0  301.07   35.20
   1 -33   0  370.36   34.00
  -1 -33   0  344.87   53.69
  -1 -33   0  313.77   27.30
   1  33   0  396.56   58.69
  -1  33   0  308.47   22.70
   1  33   0  331.97   63.89
  -1  33   0  419.56   62.49
  -2 -33   0   17.50   10.80
  -2 -33   0   11.50    9.10
   2 -33   0   21.00   11.10
  -2 -33   0    5.10   16.30
   2 -33   0   -6.10   10.20
   2  33   0   17.60   25.00
  -2  33   0   12.00   12.50
  -2  33   0   19.00   23.10
   2  33   0   25.10   22.20
  -3 -33   0    3.60    8.00
   3 -33   0   39.90   17.80
  -3 -33   0   11.60   17.90
  -3 -33   0   11.30    9.00
   3 -33   0   13.00   11.90
   3  33   0  -17.50   19.80
  -3  33   0   39.40   28.10
  -3  33   0    8.60   13.10
   3  33   0   41.40   22.80
  -4 -33   0  115.69   16.20
   4 -33   0   99.29   24.80
  -4 -33   0   96.59   28.90
  -4 -33   0  110.79   16.40
   4 -33   0  101.49   23.90
  -4  33   0   86.69   23.90
   4  33   0   65.19   36.10
  -4  33   0   76.79   34.20
   5 -33   0  101.69   26.90
  -5 -33   0  104.89   16.60
   5 -33   0   94.89   24.60
  -5 -33   0   93.99   13.40
  -5  33   0   82.59   25.20
  -5  33   0  115.49   34.80
   5  33   0   67.39   41.30
   6 -33   0  181.78   34.20
   6 -33   0  147.39   34.70
  -6 -33   0  103.89   17.00
  -6 -33   0  115.39   14.60
   6  33   0   93.19   40.60
  -6  33   0  139.39   29.80
  -6  33   0   52.79   36.60
  -7 -33   0   36.80   10.30
  -7 -33   0   37.80   10.40
   7 -33   0   30.10   21.00
   7 -33   0   36.10   19.60
   7  33   0   24.80   32.60
  -7  33   0    4.40   25.30
  -7  33   0   40.00   20.10
   8 -33   0  147.49   33.50
  -8 -33   0  142.59   18.80
   8 -33   0  175.38   38.90
  -8 -33   0  139.59   19.30
  -8  33   0   79.49   28.80
   8  33   0   83.39   45.20
   9 -33   0   44.30   23.10
  -9 -33   0    5.30    9.60
   9 -33   0   24.10   20.50
   9  33   0   31.30   37.00
  -9  33   0  -11.00   18.60
   0 -34   0   50.99   14.10
   0 -34   0   52.89   18.00
   0  34   0   71.09   32.30
   1 -34   0   29.10   13.60
  -1 -34   0   -9.70   11.60
   1 -34   0    9.40   13.00
  -1 -34   0   -6.90   16.70
  -1 -34   0   23.80   11.60
  -1  34   0    9.50   20.20
   1  34   0   48.40   26.20
   1  34   0   39.70   32.70
  -2 -34   0   34.50   10.10
   2 -34   0   13.10   10.10
  -2 -34   0    7.90   15.00
  -2 -34   0   38.00   13.10
   2 -34   0   28.80   15.00
   2  34   0   11.50   24.80
   2  34   0   40.10   28.40
  -2  34   0   34.00   25.20
  -2  34   0   31.00   12.90
  -3 -34   0    9.80   19.30
   3 -34   0   -1.00   11.60
   3 -34   0   19.50   16.70
  -3 -34   0   22.20   10.20
  -3 -34   0   45.20   13.10
   3  34   0   16.50   27.00
  -3  34   0   -9.00   11.30
  -3  34   0  -32.60   17.60
   3  34   0    6.90   18.00
  -4 -34   0  103.49   16.00
   4 -34   0  108.09   28.00
  -4 -34   0  151.98   20.00
  -4 -34   0  178.68   38.80
   4 -34   0   67.19   21.70
  -4  34   0   98.59   24.40
   4  34   0   82.99   41.00
  -4  34   0   60.79   31.40
  -5 -34   0    3.50    8.10
   5 -34   0    4.60   12.90
   5 -34   0   25.60   15.30
  -5 -34   0    4.60    6.20
  -5  34   0   -0.10   14.60
   5  34   0   11.50   32.10
  -5  34   0   -1.10   19.00
  -6 -34   0   82.09   13.30
   6 -34   0   85.89   23.80
  -6 -34   0   80.49   14.90
   6 -34   0   91.39   28.60
  -6  34   0   98.79   53.29
  -6  34   0   66.39   23.30
   6  34   0   69.59   37.60
  -7 -34   0   71.29   13.30
  -7 -34   0   61.99   11.70
   7 -34   0   60.69   23.60
   7 -34   0   72.29   26.10
  -7  34   0   32.30   24.20
   7  34   0   82.69   47.90
  -8 -34   0    0.00    8.10
  -8 -34   0   15.50   10.70
   8 -34   0  -14.90   15.00
   8 -34   0   45.00   25.40
  -8  34   0   -5.90   17.20
   8  34   0   28.10   34.50
   0 -35   0    7.30    8.00
   0 -35   0    4.60   13.40
   0  35   0   22.30   23.20
  -1 -35   0   -3.50   19.40
  -1 -35   0   25.10   11.00
  -1 -35   0  -24.50    9.20
   1 -35   0   -2.50    9.20
   1 -35   0   13.30   13.10
  -1  35   0   11.80   24.70
   1  35   0   -4.40   23.10
   1  35   0   28.70   22.80
   2 -35   0  -12.10    7.70
  -2 -35   0  -17.60   12.80
  -2 -35   0   -6.60    8.40
   2 -35   0   23.70   15.90
  -2 -35   0   -3.10    8.40
  -2  35   0   -5.20   10.00
   2  35   0   -9.40   21.90
   2  35   0   34.50   23.40
  -2  35   0   -5.90   19.20
   3 -35   0  104.59   22.90
  -3 -35   0   62.29   28.50
  -3 -35   0   94.69   16.80
  -3 -35   0   88.59   17.70
   3 -35   0  101.29   27.70
  -3  35   0  124.99   24.70
   3  35   0   46.70   33.40
   3  35   0  113.99   36.50
  -3  35   0   71.29   32.70
  -4 -35   0   77.29   16.10
   4 -35   0   33.90   19.10
   4 -35   0   33.90   17.20
  -4 -35   0   55.49   12.60
  -4  35   0   72.99   23.10
   4  35   0   87.69   42.70
  -4  35   0  -10.90   22.00
  -5 -35   0  157.18   17.00
   5 -35   0  127.99   32.30
   5 -35   0   99.99   26.60
  -5 -35   0  149.49   20.00
   5  35   0  122.59   46.30
  -5  35   0  104.49   27.80
   6 -35   0   39.50   18.80
  -6 -35   0   23.60   10.40
  -6 -35   0   40.50    8.60
   6 -35   0   62.89   24.80
   6  35   0    8.20   32.80
  -6  35   0   34.00   21.70
   7 -35   0   15.00   20.30
  -7 -35   0   36.40   10.30
   7 -35   0   20.40   18.70
  -7 -35   0   43.90   11.80
   7  35   0   87.19   40.50
  -7  35   0   30.10   23.10
   0 -36   0   10.00    8.90
   0 -36   0  -15.00   12.60
   0 -36   0  -15.60   14.30
   0  36   0   16.20   22.60
  -1 -36   0   22.90   20.20
  -1 -36   0  -27.10   11.70
   1 -36   0   11.00   12.90
  -1 -36   0    5.30    8.50
   1 -36   0    2.40   11.70
  -1  36   0    6.90   25.00
   1  36   0   11.10   25.60
   1  36   0   -4.70   22.00
   2 -36   0   11.80   16.40
  -2 -36   0  -11.40    6.90
   2 -36   0    2.10    9.40
  -2 -36   0  -21.50   16.40
  -2 -36   0   11.00    9.70
  -2  36   0    9.80   10.30
   2  36   0   -1.50   22.50
  -2  36   0   -4.90   21.50
   2  36   0  -16.70   21.40
  -3 -36   0   -9.00   23.70
   3 -36   0    5.60   14.90
  -3 -36   0    9.00    8.80
  -3 -36   0    9.20   11.20
   3 -36   0   -3.40   12.00
   3  36   0   -3.70   25.30
  -3  36   0    7.00   22.20
  -3  36   0   24.40   14.80
   3  36   0   11.50   23.20
  -4 -36   0   27.40   11.40
   4 -36   0    2.10   13.40
  -4 -36   0   20.90    9.10
   4 -36   0   12.60   17.40
  -4  36   0   10.60   15.00
   4  36   0    5.40   30.90
  -5 -36   0  159.88   18.00
  -5 -36   0  150.78   20.70
   5 -36   0  127.19   29.40
   5 -36   0  123.19   32.20
  -5  36   0  117.19   29.50
   5  36   0   34.80   37.00
   6 -36   0    6.70   14.90
  -6 -36   0   18.70    8.80
   6 -36   0   -3.10   16.30
  -6 -36   0   15.40    8.30
   6  36   0   36.40   35.30
  -6  36   0   11.20   18.10
  -7  36   0  297.67   49.70
   0 -37   0  -34.70   10.80
   0 -37   0  -18.40   20.10
   0 -37   0    1.00    7.90
   0  37   0   14.40   21.20
  -1 -37   0   66.89   18.40
  -1 -37   0  107.49   33.90
  -1 -37   0   98.29   19.90
   1 -37   0  103.99   23.70
   1 -37   0   89.49   22.40
   1  37   0   88.89   35.30
  -1  37   0   75.59   33.70
  -2 -37   0  139.89   22.10
  -2 -37   0  144.89   22.50
  -2 -37   0  107.59   37.40
   2 -37   0   84.49   25.80
   2 -37   0   73.59   20.40
  -2  37   0  107.29   16.60
   2  37   0  112.99   39.10
   2  37   0   67.09   44.20
   3 -37   0   24.80   19.00
   3 -37   0   14.60   14.00
  -3 -37   0  -46.60   21.40
  -3 -37   0   44.00   13.80
  -3 -37   0   25.50   10.60
  -3  37   0   17.00   14.20
   3  37   0   27.80   31.10
  -4 -37   0    6.10    9.90
   4 -37   0   -4.20   12.00
   4 -37   0    5.70   17.80
  -4 -37   0    4.50    8.30
  -4  37   0   -8.70   13.90
   4  37   0   42.40   33.10
   5 -37   0    5.70   16.00
   5 -37   0   -2.30   16.10
  -5 -37   0   -3.50    7.10
  -5 -37   0    2.50    8.40
   5  37   0    0.00   33.40
  -5  37   0   16.20   17.80
  -6  37   0  139.69   34.60
   0 -38   0  199.18   32.30
   0 -38   0  187.78   27.50
   0  38   0  181.38   52.79
   1 -38   0   66.59   21.40
  -1 -38   0   48.90   15.30
  -1 -38   0  110.39   22.00
   1 -38   0   17.30   15.50
  -1 -38   0  -11.20   25.60
   1  38   0   21.80   27.70
   2 -38   0   69.49   20.40
  -2 -38   0   80.39   18.40
  -2 -38   0   79.59   29.00
  -2 -38   0  104.79   20.30
   2 -38   0   78.49   25.80
   2  38   0  121.19   39.10
   2  38   0  105.99   57.49
  -3 -38   0   86.79   19.30
  -3 -38   0   84.69   17.20
  -3 -38   0   99.69   33.70
   3 -38   0   98.39   28.20
   3 -38   0   82.19   23.70
  -3  38   0   52.59   17.50
   3  38   0   48.60   32.90
  -4 -38   0   -9.60    8.10
  -4 -38   0   -4.20    7.80
   4 -38   0   -5.30   12.00
   4 -38   0   10.70   18.10
  -4  38   0    7.20   13.70
   4  38   0   -4.40   27.90
   0 -39   0   -1.50    8.40
   0 -39   0    7.30   15.20
  -1 -39   0   44.40   14.80
  -1 -39   0   51.99   16.80
   1 -39   0   29.20   16.20
   1 -39   0   48.90   19.70
   2 -39   0   15.70   12.90
  -2 -39   0    4.60   13.10
   2 -39   0   25.40   15.80
  -2 -39   0   23.60   11.60
  -3  39   0   10.70   12.70
 -15   0   1  -24.30   16.30
 -14   0   1   -1.80   15.90
 -13   0   1   34.20   20.40
 -12   0   1    8.90   12.60
 -11   0   1   17.20   13.30
 -10   0   1    6.50   10.70
  -9   0   1   12.50   10.50
  -8   0   1    4.60    4.70
  -8   0   1   -2.70    7.80
  -7   0   1  106.59   14.30
  -7   0   1  146.69   21.70
  -6   0   1    0.20    5.40
  -6   0   1    2.00    4.20
  -5   0   1   19.60    5.80
  -5   0   1    3.40    4.70
  -4   0   1    8.70    4.30
  -4   0   1   -1.40    4.10
  -3   0   1   69.69    8.50
  -3   0   1   67.09    9.10
  -2   0   1   -2.80    1.90
  -1   0   1 2011.10   69.29
   0   0   1    0.00    0.30
   0   0  -1    0.70    0.50
  -2   0  -1   -1.30    1.50
  -3   0  -1  141.09    9.20
  -3   0  -1  137.79   12.50
  -4   0  -1   -2.70    2.50
  -4   0  -1    3.30    4.20
  -5   0  -1  593.84   32.70
  -5   0  -1  501.75   24.90
  -6   0  -1   -0.30    5.60
  -6   0  -1    5.30    4.50
  -7   0  -1  130.59   12.30
  -7   0  -1  161.48   22.60
  -8   0  -1    6.40    4.90
  -8   0  -1    1.00    8.20
  -9   0  -1   23.10   12.20
 -10   0  -1   -6.10   10.30
 -11   0  -1   53.59   19.60
 -12   0  -1    3.30   11.10
 -13   0  -1  242.28   40.60
 -14   0  -1  -11.50   15.10
 -15   0  -1  -17.70   19.30
  16   0   1  -13.30   16.60
 -16  -1   1   -3.70   26.90
  16   1  -1   16.60   24.10
 -15  -1   1   11.70   21.80
 -14  -1   1   25.00   22.10
 -14   1   1   47.70   24.10
 -13  -1   1  261.47   41.20
 -13   1   1  267.17   43.10
 -12  -1   1   31.00   16.70
 -12   1   1   -3.20   13.50
 -11  -1   1  692.13   53.69
 -11   1   1  771.32   56.89
 -10  -1   1   32.30   15.50
 -10   1   1   25.70   13.90
  -9  -1   1 1351.26   71.59
  -9   1   1 1480.75   74.79
  -9   1   1 1224.08   63.19
  -8  -1   1  475.55   36.30
  -8   1   1  483.35   30.10
  -8   1   1  530.15   38.30
  -7  -1   1 1150.48   57.69
  -7  -1   1 1048.70   48.10
  -7   1   1 1242.28   63.39
  -7   1   1 1076.49   50.79
  -7   1   1 1227.18   60.19
  -6  -1   1  264.17   22.40
  -6  -1   1  268.17   18.10
  -6   1   1  213.88   18.20
  -6   1   1  274.67   23.60
  -5  -1   1  181.08   16.90
  -5  -1   1  195.08   13.90
  -5   1   1  226.98   19.20
  -5   1   1  166.88   14.30
  -4  -1   1    1.40    3.40
  -4  -1   1    5.90    4.30
  -4   1   1    5.80    5.20
  -4   1   1    3.50    3.70
  -3  -1   1 1050.89   43.40
  -3   1   1 1039.40   42.30
  -3   1   1 1067.29   44.60
  -2  -1   1  266.37   12.80
  -2   1   1  241.38   13.60
  -1  -1   1 6258.87  186.08
  -1   1   1 4894.01  186.18
   0  -1   1    0.50    0.70
   0  -1  -1    0.10    0.80
   0  -1   1   -0.30    0.50
   0   1  -1   -0.30    0.50
   0   1  -1   -0.20    0.50
   0   1   1   -0.70    0.50
  -1   1  -1 9999.00  330.27
  -2   1  -1  622.54   25.00
  -3  -1  -1 2100.29   75.39
  -3  -1  -1 2326.87   82.79
  -3   1  -1 2308.77   83.49
  -3   1  -1 2144.09   78.59
  -4  -1  -1   15.40    3.50
  -4  -1  -1   15.80    5.90
  -4   1  -1   15.60    4.80
  -4   1  -1   12.70    6.00
  -5  -1  -1   -5.30    2.80
  -5  -1  -1    5.50    5.80
  -5   1  -1    3.30    6.70
  -5   1  -1    8.00    4.80
  -6  -1  -1  351.96   26.60
  -6  -1  -1  364.26   19.10
  -6   1  -1  360.06   27.50
  -6   1  -1  351.66   29.10
  -6   1  -1  340.37   21.10
  -7  -1  -1   53.39   13.10
  -7  -1  -1   82.99   10.10
  -7   1  -1   69.09   16.30
  -7   1  -1   75.49   11.40
  -7   1  -1   63.49   15.90
  -8  -1  -1   44.20    7.90
  -8  -1  -1   27.30   11.10
  -8   1  -1   54.69   15.40
  -8   1  -1   32.10    8.40
  -9  -1  -1   10.60   10.60
  -9   1  -1   28.90   14.10
 -10  -1  -1    5.80   11.00
 -10   1  -1   17.90   13.90
 -11  -1  -1    2.50   12.30
 -11   1  -1   -7.30   10.60
 -12  -1  -1   29.60   15.90
 -12   1  -1   50.29   20.10
 -13  -1  -1   69.39   24.70
 -13   1  -1   82.19   25.00
 -14  -1  -1   17.10   21.00
 -14   1  -1   12.00   18.60
 -15  -1  -1   23.50   22.50
  15   1   1    4.70   16.00
  16   1   1   -5.70   17.20
 -16  -2   1  -16.30   19.80
  16   2  -1  -47.00   14.10
 -15  -2   1   35.90   23.60
 -14  -2   1   13.40   18.00
 -14   2   1   14.90   18.20
 -13  -2   1  111.99   27.30
 -13   2   1  126.69   31.90
 -12  -2   1  157.68   28.90
 -12   2   1  118.19   30.60
 -11  -2   1   19.80   14.90
 -11   2   1   -1.00   13.00
 -10  -2   1  498.95   41.70
 -10   2   1  497.25   43.60
  -9  -2   1  328.77   32.10
  -9   2   1  397.96   27.70
  -9   2   1  365.96   35.10
  -8  -2   1  566.84   39.20
  -8  -2   1  560.64   30.30
  -8   2   1  565.04   41.40
  -8   2   1  604.44   34.30
  -7  -2   1 1011.00   45.00
  -7  -2   1 1052.29   54.59
  -7   2   1 1128.89   51.49
  -7   2   1 1035.80   56.49
  -7   2   1 1094.09   60.19
  -6  -2   1  616.44   35.60
  -6  -2   1  538.85   28.20
  -6   2   1  616.94   32.70
  -6   2   1  632.44   40.00
  -6   2   1  551.14   36.00
  -5  -2   1   18.60    5.60
  -5  -2   1    7.80    5.30
  -5   2   1    6.40    6.10
  -5   2   1   -4.20    6.30
  -5   2   1   28.30    7.70
  -4  -2   1  218.18   16.20
  -4   2   1  231.88   18.00
  -4   2   1  199.38   15.40
  -3  -2   1 2114.99   77.19
  -3  -2   1 2225.88   75.39
  -3   2   1 2000.90   77.79
  -3   2   1 2050.29   79.39
  -2  -2   1 1172.18   42.80
  -2  -2   1 1151.48   42.90
  -2   2   1 1150.08   45.30
  -1  -2   1 1393.76   50.49
  -1   2   1 1457.45   52.39
  -1  -2  -1  872.01   31.80
  -1  -2  -1  931.21   32.20
   1   2   1  931.21   32.20
   1   2   1  936.41   32.00
  -1   2  -1  903.61   34.90
  -2  -2  -1  394.16   18.10
  -2   2  -1  346.87   17.80
  -3  -2  -1 1277.37   49.80
   3   2   1 1216.58   43.80
  -3   2  -1 1173.98   48.10
  -3   2  -1 1287.77   51.79
  -4  -2  -1  320.27   20.10
  -4   2  -1  183.58   29.80
  -4   2  -1  308.57   21.20
  -4   2  -1  261.57   16.90
  -5  -2  -1   76.99   13.30
  -5   2  -1   62.39   13.10
  -5   2  -1   68.89   14.80
  -5   2  -1   61.49    9.60
  -6  -2  -1  260.57   14.70
  -6  -2  -1  266.67   22.90
  -6   2  -1  276.97   24.10
  -6   2  -1  272.67   25.80
  -6   2  -1  271.47   19.00
  -7  -2  -1    2.90    6.90
  -7  -2  -1    2.30    3.50
   7  -2   1    8.70   11.10
  -7   2  -1    9.00    4.60
  -7   2  -1   -0.50    6.40
  -7   2  -1    7.40    8.20
  -8  -2  -1  116.49   11.70
  -8  -2  -1  132.29   22.50
  -8   2  -1  118.19   15.60
  -8   2  -1  146.09   24.20
  -8   2  -1  120.49   30.40
  -9  -2  -1   26.90   12.20
  -9   2  -1   55.79   17.70
 -10  -2  -1  188.38   29.90
 -10   2  -1  251.47   37.80
 -11  -2  -1   26.90   14.00
 -11   2  -1   59.39   19.80
 -12  -2  -1  209.18   36.50
 -12   2  -1  233.28   40.00
 -13  -2  -1   21.60   15.00
 -13   2  -1   30.20   18.70
 -14  -2  -1  150.68   33.30
  14   2   1   84.29   37.70
 -15  -2  -1   23.40   21.70
  15   2   1   23.60   27.50
 -16  -2  -1  104.89   35.00
  16   2   1  147.79   38.80
 -16  -3   1   10.30   26.10
 -15  -3   1   24.20   20.80
  15   3  -1   -1.10   19.80
 -14  -3   1   27.80   21.50
 -13  -3   1   17.00   16.40
 -13   3   1   17.90   17.60
 -12  -3   1   44.60   18.20
 -12   3   1   16.00   16.20
 -11  -3   1   15.00   12.30
 -11   3   1    3.30   13.10
 -10  -3   1    0.60   10.40
 -10   3   1    7.20   14.10
  -9  -3   1    9.30    8.90
  -9   3   1    6.20    9.70
  -9   3   1   -1.30    6.00
  -8  -3   1   31.00    7.60
  -8  -3   1   20.00   10.80
  -8   3   1   30.10   10.60
  -8   3   1   43.70   15.10
  -8   3   1   -7.70   11.30
  -7  -3   1   -3.20    6.70
  -7  -3   1    1.30    4.30
   7  -3  -1   11.10    8.60
  -7   3   1   -6.20    6.70
  -7   3   1   -2.90    7.10
  -7   3   1    1.40    6.70
  -6  -3   1    3.60    4.30
   6  -3  -1   -3.20    8.40
  -6  -3   1    2.70    7.00
  -6   3   1    5.70    8.20
  -6   3   1   16.60    7.60
  -6   3   1    9.10    9.70
  -5  -3   1  162.88   15.50
   5  -3  -1  180.58   21.20
  -5   3   1  168.38   20.90
  -5   3   1  169.28   15.60
  -5   3   1  165.18   21.50
  -4  -3   1  583.94   33.80
  -4  -3   1  658.13   31.60
  -4  -3   1  662.23   28.30
  -4   3   1  627.24   32.50
  -4   3   1  735.73   37.90
  -4   3   1  615.44   33.60
  -3  -3   1   23.80    5.50
  -3  -3   1   14.90    4.20
  -3   3   1   14.60    8.20
  -3   3   1   30.70    7.50
  -3   3   1   16.60    5.80
  -2  -3   1  153.98    9.00
  -2  -3   1  166.68   10.10
  -2   3   1  168.28   12.30
   2   3  -1  141.29    9.30
  -1  -3   1 1073.09   39.00
  -1   3   1 1079.39   41.00
   1   3  -1  929.21   38.80
   0  -3   1   27.70    4.50
   0   3  -1   21.20    4.00
   0   3   1   20.30    3.90
  -1  -3  -1   68.09    5.00
  -1   3  -1   49.40    6.80
   1   3   1   68.29    5.30
  -2  -3  -1  191.68   10.80
  -2  -3  -1  165.78    8.70
  -2   3  -1  182.98   12.50
   2   3   1  179.88    8.60
  -3  -3  -1 1677.73   53.09
  -3  -3  -1 1477.95   58.39
  -3   3  -1 1407.56   58.99
   3   3   1 1574.54   65.19
  -3   3  -1 1460.65   63.49
   4  -3   1  593.44   32.90
  -4  -3  -1  636.94   31.20
  -4   3  -1  579.64   34.60
  -4   3  -1  587.74   29.90
  -4   3  -1  592.34   32.50
   5  -3   1 1512.35   68.49
  -5  -3  -1 1549.45   66.19
  -5   3  -1 1584.64   68.89
  -5   3  -1 1594.34   64.29
  -5   3  -1 1619.74   72.69
   6  -3   1   -2.80    7.30
  -6  -3  -1   -2.50    5.00
  -6   3  -1    4.80    7.30
  -6   3  -1    8.30    5.30
  -6   3  -1    2.70    7.90
   7  -3   1  265.87   25.60
  -7  -3  -1  185.68   12.40
  -7  -3  -1  248.08   23.00
  -7   3  -1  248.08   25.50
  -7   3  -1  268.47   20.10
  -7   3  -1  226.48   27.70
  -8  -3  -1   87.89   17.60
  -8   3  -1  122.39   21.40
  -8   3  -1  130.19   25.00
  -8   3  -1  128.99   17.00
  -9  -3  -1  120.89   21.70
  -9   3  -1  146.19   27.80
  -9   3  -1  117.99   22.90
 -10  -3  -1    8.30   11.90
 -10   3  -1    5.70   12.20
 -11  -3  -1  413.36   40.20
 -11   3  -1  442.16   43.60
 -12  -3  -1    6.10   14.00
 -12   3  -1   10.80   16.20
 -13  -3  -1 1272.27   80.49
  13   3   1 1047.20   87.09
 -13   3  -1 1147.89   80.99
 -14  -3  -1   24.50   16.80
  14   3   1   17.50   30.90
 -15  -3  -1  982.00   78.69
 -16  -3  -1    4.70   21.60
  16   3   1   69.89   39.70
 -16  -4   1   39.50   27.80
  16   4  -1   40.50   26.50
 -15  -4   1  136.99   35.10
 -14  -4   1    6.60   15.90
  14   4  -1   29.40   26.70
 -13  -4   1   12.70   13.40
  13   4  -1    5.40   17.30
 -12  -4   1    1.20   11.90
 -12   4   1    0.40   13.50
 -11  -4   1   81.59   21.50
 -11   4   1  134.09   30.70
 -10  -4   1   75.79   20.30
 -10   4   1   53.19   19.70
  -9  -4   1  172.08   26.70
  -9   4   1  164.48   21.50
  -9   4   1  187.38   31.50
  -8  -4   1    2.00    7.90
  -8  -4   1    1.50    4.00
  -8   4   1    2.50    6.60
  -8   4   1  -12.80    9.60
  -8   4   1    4.30    8.80
  -7  -4   1  564.74   37.00
  -7  -4   1  611.24   29.10
   7  -4  -1  593.84   40.70
  -7   4   1  593.04   40.50
  -7   4   1  642.94   44.30
  -7   4   1  674.73   38.20
   6  -4  -1    7.10    8.90
  -6  -4   1   11.80    7.50
  -6  -4   1   19.50    6.20
  -6   4   1   14.70    9.70
  -6   4   1    5.00    7.60
  -6   4   1    4.70    7.70
  -5  -4   1  609.54   26.80
   5  -4  -1  553.74   34.20
  -5  -4   1  564.04   30.80
  -5   4   1  553.34   34.00
  -5   4   1  480.85   34.60
  -5   4   1  565.54   32.70
  -4  -4   1   14.30    4.50
  -4  -4   1   24.40    5.80
  -4  -4   1   11.90    5.20
   4  -4  -1   17.50    7.00
  -4   4   1   11.70    6.00
  -4   4   1   17.70    7.60
  -4   4   1   13.80    7.20
  -3  -4   1  166.98   11.30
   3  -4  -1  168.88   14.70
  -3  -4   1  162.98   11.20
  -3   4   1  139.79   16.10
  -3   4   1  163.18   15.60
   3   4  -1  182.68   16.00
   2  -4  -1  260.17   17.80
  -2  -4   1  237.48   14.10
  -2  -4   1  237.88   11.40
  -2   4   1  295.17   18.00
  -2   4   1  275.57   17.40
   2   4  -1  239.58   13.90
  -1  -4   1  485.55   23.40
  -1  -4   1  527.85   23.30
   1   4  -1  482.35   23.30
  -1   4   1  591.04   25.80
  -1   4   1  495.15   25.50
   0   4   1 1285.57   48.60
   0   4  -1 1237.68   48.70
  -1  -4  -1  585.54   24.00
   1   4   1  591.84   23.00
  -1   4  -1  538.25   25.00
  -1   4  -1  578.24   26.80
  -2  -4  -1  548.15   22.90
   2  -4   1  565.84   27.00
  -2   4  -1  589.54   27.60
   2   4   1  541.65   23.00
  -2   4  -1  557.24   28.00
   2   4   1  537.05   30.40
   2   4   1  530.85   22.50
  -3  -4  -1  440.66   17.80
  -3  -4  -1  417.66   21.20
   3  -4   1  409.06   24.40
   3   4   1  417.26   26.80
  -3   4  -1  398.16   23.20
  -3   4  -1  389.96   25.30
   3   4   1  385.16   17.00
  -4  -4  -1   96.09   12.70
  -4  -4  -1  106.89    7.10
   4  -4   1  100.29   14.80
  -4   4  -1  124.79   18.30
   4   4   1  135.49   19.00
  -4   4  -1  107.89   13.40
  -4   4  -1  100.49   14.20
   5  -4   1    6.90    6.00
  -5  -4  -1   24.50    7.90
  -5   4  -1   22.10    7.20
  -5   4  -1   14.60    8.00
   5   4   1   12.00    8.00
  -5   4  -1   37.20   12.20
  -6  -4  -1   43.90   11.00
   6  -4   1   54.19   14.60
  -6   4  -1   53.29   16.90
  -6   4  -1   56.99   11.20
  -6   4  -1   42.00   13.30
   7  -4   1   47.20   14.10
  -7  -4  -1   37.10    5.60
  -7  -4  -1   49.50   12.40
  -7   4  -1   46.70   14.10
  -7   4  -1   51.19   11.20
  -7   4  -1   88.89   18.30
  -8  -4  -1   19.10   10.70
  -8   4  -1   19.80    7.80
  -8   4  -1   44.10   15.50
  -8   4  -1   25.20   13.10
  -9  -4  -1  329.17   31.00
  -9   4  -1  276.87   24.40
  -9   4  -1  296.47   36.90
 -10  -4  -1   47.80   17.20
 -10   4  -1   51.99   17.60
 -11  -4  -1  102.39   24.00
 -11   4  -1  101.29   25.70
  11   4   1  112.79   29.80
 -12  -4  -1   67.89   21.90
 -12   4  -1   96.39   28.20
  12   4   1   40.60   21.70
 -13  -4  -1   56.39   19.50
  13   4   1   -8.80   15.70
 -14  -4  -1  622.44   59.39
  14   4   1  695.83   71.79
 -15  -4  -1   28.50   20.00
  15   4   1   27.90   23.30
 -16  -4  -1  194.18   43.90
  16   4   1  164.68   48.70
 -16  -5   1   91.89   30.70
  16   5  -1   57.29   33.90
 -15  -5   1   27.30   22.10
  15   5  -1   23.50   28.70
 -14  -5   1  370.26   51.49
  14   5  -1  220.78   46.90
 -13  -5   1  186.38   34.10
  13   5  -1  156.38   41.70
 -12  -5   1   21.00   14.50
 -12   5   1  -16.70   14.10
  12   5  -1   12.90   17.20
 -11  -5   1  417.76   39.80
 -11   5   1  390.36   46.50
 -10  -5   1  354.96   34.50
 -10   5   1  388.76   44.70
  -9  -5   1  280.47   32.80
  -9   5   1  338.07   41.30
  -9   5   1  242.78   23.50
  -8  -5   1  256.57   24.90
   8  -5  -1  289.77   37.40
  -8  -5   1  211.68   19.70
  -8   5   1  208.78   21.70
  -8   5   1  213.48   31.50
  -8   5   1  312.27   36.70
  -7  -5   1    4.60    4.00
   7  -5  -1   -2.90    6.90
  -7  -5   1    6.80    6.60
  -7   5   1  -10.60    6.80
  -7   5   1    0.60    9.00
  -7   5   1    8.10    6.90
  -6  -5   1  295.87   22.70
   6  -5  -1  240.08   24.60
  -6  -5   1  322.17   18.50
  -6   5   1  292.57   26.20
  -6   5   1  289.27   24.10
  -6   5   1  279.17   28.10
   5  -5  -1  228.08   21.80
  -5  -5   1  249.38   18.90
  -5  -5   1  263.47   16.20
  -5   5   1  240.68   20.90
  -5   5   1  287.77   25.60
  -5   5   1  246.48   22.00
  -4  -5   1  148.89   12.60
   4  -5  -1  185.28   17.40
  -4  -5   1  184.88   13.20
  -4  -5   1  195.18   12.80
   4   5  -1  182.58   18.90
  -4   5   1  177.68   17.00
  -4   5   1  171.28   16.70
  -4   5   1  182.08   18.90
  -3  -5   1    7.00    3.10
  -3  -5   1    0.10    2.70
   3  -5  -1    3.50    4.60
  -3   5   1   -0.40    5.00
  -3   5   1    2.30    5.30
   3   5  -1    1.50    3.00
   3   5  -1   -0.10    4.50
   2  -5  -1  475.85   24.00
  -2  -5   1  434.16   21.80
  -2   5   1  455.15   24.70
   2   5  -1  456.75   22.90
   2   5  -1  469.25   27.20
   2   5  -1  433.96   19.10
  -2   5   1  456.25   25.60
   2   5  -1  411.66   21.50
   1  -5  -1  909.61   36.40
  -1  -5   1  883.91   38.30
  -1  -5   1  947.61   38.10
   1   5  -1  890.31   38.10
  -1   5   1  926.21   37.50
  -1   5   1  890.81   39.50
   0  -5  -1   95.89    6.30
   0   5   1   80.99    8.60
   0   5  -1   89.19    9.00
   0   5  -1   96.09    6.20
   0   5   1   85.99    6.60
  -1  -5  -1  233.68   13.90
   1  -5   1  278.47   14.50
  -1  -5  -1  261.57   10.40
  -1   5  -1  210.08   15.70
   1   5   1  269.97   12.40
  -1   5  -1  249.48   14.70
   2  -5   1   10.70    4.90
  -2  -5  -1    7.30    3.50
  -2  -5  -1    8.60    2.80
  -2   5  -1    9.40    4.70
   2   5   1    5.70    3.50
  -2   5  -1   -0.70    4.00
   2   5   1    9.10    6.30
   2   5   1   10.00    3.80
   2   5   1    8.20    3.50
  -3  -5  -1  379.36   19.40
   3  -5   1  389.26   23.90
  -3  -5  -1  366.96   17.70
   3   5   1  355.96   25.80
  -3   5  -1  396.86   25.40
   3   5   1  373.16   17.50
  -3   5  -1  391.86   24.10
   3   5   1  402.46   19.30
   4  -5   1  159.68   18.60
  -4  -5  -1  164.58    9.80
  -4  -5  -1  166.98   13.60
  -4   5  -1  152.88   20.60
   4   5   1  174.88   23.30
  -4   5  -1  133.59   14.30
  -4   5  -1  173.98   17.00
  -5  -5  -1  129.39   16.70
   5  -5   1  122.89   17.90
   5   5   1  127.49   21.40
  -5   5  -1  138.49   18.40
  -5   5  -1  130.69   16.50
  -5   5  -1  158.48   23.60
  -6  -5  -1  405.96   18.30
   6  -5   1  452.45   33.50
  -6  -5  -1  465.45   30.00
  -6   5  -1  477.65   29.60
  -6   5  -1  538.65   37.60
   6   5   1  506.95   37.90
  -6   5  -1  484.65   33.70
   7  -5   1  131.59   21.90
  -7  -5  -1  128.99   20.30
   7   5   1  155.68   27.80
  -7   5  -1  180.38   21.30
  -7   5  -1  144.99   25.90
  -7   5  -1  137.09   22.80
  -8  -5  -1   24.00   10.50
   8  -5   1   11.00   10.30
  -8   5  -1    0.50    5.70
   8   5   1    3.90    9.50
  -8   5  -1    5.20    9.40
  -8   5  -1   26.50   12.00
  -9  -5  -1  443.26   36.80
  -9   5  -1  494.35   33.80
   9   5   1  517.45   46.50
  -9   5  -1  497.25   41.70
 -10  -5  -1   46.90   16.10
  10   5   1   58.49   21.80
 -10   5  -1   45.90   17.90
 -11  -5  -1  332.87   40.10
  11   5   1  376.26   54.89
 -11   5  -1  348.67   44.80
 -12  -5  -1   20.90   15.60
 -13  -5  -1  102.19   27.00
  13   5   1  213.18   42.70
 -14  -5  -1   30.40   16.60
  14   5   1   35.80   22.30
 -15  -5  -1   13.90   19.10
  15   5   1   22.90   21.90
 -16  -5  -1    3.10   18.80
  16   5   1   59.69   36.60
 -16  -6   1    2.00   19.50
  16   6  -1   -6.70   22.90
 -15  -6   1  204.78   41.80
  15   6  -1  211.48   52.19
 -14  -6   1    1.70   13.70
  14   6  -1   19.10   21.70
 -13  -6   1  168.28   34.80
  13   6  -1  139.49   38.50
 -12  -6   1  247.98   38.10
  12   6  -1  193.38   40.50
 -11  -6   1   14.70   12.90
  11   6  -1   13.30   16.70
 -11   6   1   -4.00   12.70
 -10  -6   1  114.89   23.30
  10   6  -1  132.39   30.80
 -10   6   1  108.79   24.90
  -9  -6   1  116.79   21.10
  -9   6   1  128.19   26.60
  -9   6   1  102.69   17.80
   9   6  -1  142.39   31.10
   8  -6  -1  178.38   25.90
  -8  -6   1  242.68   27.20
  -8   6   1  145.89   24.40
  -8   6   1  184.78   24.10
   8   6  -1  159.48   29.80
  -8   6   1  173.38   30.00
  -7  -6   1    8.30    7.00
   7  -6  -1    3.40    9.80
  -7  -6   1   12.90    4.40
  -7   6   1   10.90    9.50
  -7   6   1    0.80    8.10
   7   6  -1   15.50   10.70
  -7   6   1   10.70    8.80
   6  -6  -1 2248.38   95.39
  -6  -6   1 2065.09   87.29
  -6  -6   1 2367.36   82.69
   6   6  -1 2042.40   99.09
  -6   6   1 2210.78   94.49
  -6   6   1 2196.88   98.49
  -6   6   1 2106.79   91.39
  -5  -6   1  393.66   23.50
  -5  -6   1  375.66   21.00
   5  -6  -1  380.46   28.70
   5   6  -1  354.56   30.30
  -5   6   1  422.26   29.20
  -5   6   1  374.76   27.50
  -5   6   1  391.76   30.40
   4  -6  -1  402.86   27.70
  -4  -6   1  416.16   22.30
  -4  -6   1  440.36   21.80
  -4  -6   1  465.05   23.10
  -4   6   1  427.16   29.90
  -4   6   1  474.75   28.30
   4   6  -1  400.16   23.00
   4   6  -1  433.76   31.20
  -4   6   1  424.46   28.60
  -3  -6   1   19.30    5.60
  -3  -6   1   20.90    4.40
   3  -6  -1   20.30    7.30
  -3   6   1   13.40    7.30
   3   6  -1   27.60    9.50
   3   6  -1   33.70    5.50
   3   6  -1   19.70    6.00
   3   6  -1   21.70    5.70
  -3   6   1   27.20    8.60
  -2  -6   1  403.86   21.70
   2  -6  -1  441.26   23.20
   2   6  -1  402.16   21.70
  -2   6   1  396.46   24.40
   2   6  -1  402.26   25.20
   2   6  -1  380.06   21.90
   2   6  -1  381.26   15.70
  -2   6   1  440.66   24.10
  -1  -6   1   -1.10    2.90
   1  -6  -1   -0.30    2.90
  -1   6   1   11.40    5.40
   1   6  -1   13.30    4.80
   1   6  -1    6.10    4.10
  -1   6   1    2.70    3.50
   0   6  -1   82.29    6.30
   0   6   1   70.49    6.80
   0   6   1   70.49    9.50
   0   6  -1   85.39   11.10
   1  -6   1  119.89    9.60
  -1  -6  -1  111.89    5.50
   1   6   1  140.49   18.90
  -1   6  -1  113.49    9.80
  -1   6  -1   87.89   11.70
   1   6   1  113.89    7.60
  -2  -6  -1   56.39    5.30
  -2  -6  -1   34.40    6.70
   2  -6   1   47.50    8.30
  -2   6  -1   36.60    8.00
   2   6   1   34.70    6.60
   2   6   1   70.59   12.90
  -2   6  -1   46.50    8.80
   2   6   1   48.40    6.50
   2   6   1   38.40    6.70
   3  -6   1  387.46   24.00
  -3  -6  -1  365.76   18.50
  -3  -6  -1  308.77   18.30
  -3   6  -1  389.66   25.60
   3   6   1  346.17   18.30
  -3   6  -1  409.96   25.10
   3   6   1  383.46   27.40
   3   6   1  377.16   19.60
   4  -6   1    9.60    6.40
  -4  -6  -1   18.70    4.80
  -4  -6  -1   15.00    5.10
  -4   6  -1   20.50    8.00
   4   6   1   30.90   10.50
  -4   6  -1   27.40    8.00
  -4   6  -1   11.00    7.90
   4   6   1   17.30    4.10
  -5  -6  -1    5.20    5.20
   5  -6   1   14.60    7.70
  -5  -6  -1   10.80    3.80
  -5   6  -1    9.50    6.40
   5   6   1    1.50    7.80
  -5   6  -1   20.10    7.90
  -5   6  -1    1.20    6.90
  -6  -6  -1  104.79   15.90
   6  -6   1   87.49   17.70
  -6   6  -1   92.19   15.50
   6   6   1  105.49   21.40
  -6   6  -1   87.29   17.40
  -6   6  -1  104.49   22.20
  -7  -6  -1    2.30    6.10
   7  -6   1    9.60    9.10
  -7   6  -1   13.90    9.10
  -7   6  -1    4.40    8.50
  -7   6  -1    8.90    8.10
   7   6   1   35.90   15.60
   8  -6   1   -0.90    8.30
  -8  -6  -1    0.30    7.10
  -8   6  -1    2.20   10.50
   8   6   1    0.60    8.90
  -8   6  -1   10.20    6.20
  -8   6  -1   -5.90    6.10
  -9  -6  -1   25.40   11.80
   9   6   1    6.20   13.90
  -9   6  -1   42.10   16.30
  -9   6  -1   13.60    9.10
 -10  -6  -1  209.68   32.00
 -10   6  -1  159.78   29.50
  10   6   1  120.49   32.00
 -11  -6  -1   -0.70    9.50
  11   6   1   34.60   18.10
 -11   6  -1   14.60   17.60
 -12  -6  -1  459.55   44.30
  12   6   1  580.14   60.49
 -13  -6  -1  107.99   27.50
  13   6   1   85.39   30.60
 -14  -6  -1  396.96   54.49
  14   6   1  248.98   51.79
 -15  -6  -1    9.50   18.70
  15   6   1    1.50   19.80
 -16  -6  -1   83.89   30.90
  16   6   1   68.89   36.20
 -16  -7   1   -8.40   18.80
  16   7  -1  -13.50   26.60
 -15  -7   1  141.19   36.00
  15   7  -1   35.70   32.50
 -14  -7   1   43.20   20.30
  14   7  -1   15.10   25.60
 -13  -7   1   76.79   23.20
  13   7  -1   89.09   33.20
 -12  -7   1   16.60   13.90
  12   7  -1   14.00   17.60
 -11  -7   1   55.29   18.70
  11   7  -1   29.70   21.20
 -10  -7   1    9.40    9.60
 -10   7   1   43.20   13.00
 -10   7   1  -14.00   10.10
  10   7  -1   -6.50   11.40
  -9  -7   1  288.67   28.50
   9   7  -1  239.88   39.30
  -9   7   1  277.77   35.40
  -9   7   1  251.57   25.10
  -8  -7   1   94.39   17.80
   8  -7  -1  102.39   20.60
   8   7  -1  104.49   25.80
  -8   7   1  119.39   24.50
  -8   7   1   89.59   17.60
  -8   7   1   88.09   21.90
  -7  -7   1 1736.93   77.09
   7  -7  -1 1720.83   84.29
  -7  -7   1 1826.52   69.19
  -7  -7   1 1831.92   69.19
  -7   7   1 2032.80   87.49
  -7   7   1 1642.64   79.79
   7   7  -1 1828.92   91.99
   7   7  -1 1755.52   78.39
  -7   7   1 1603.24   86.09
  -6  -7   1   91.69   14.90
   6  -7  -1   76.89   17.10
  -6  -7   1   91.09   11.80
  -6   7   1   90.09   18.80
   6   7  -1   82.89   14.40
   6   7  -1   51.49   17.00
  -6   7   1   92.29   16.30
  -6   7   1  121.39   20.90
  -5  -7   1 4785.02  161.68
   5  -7  -1 4441.56  171.28
  -5  -7   1 4624.24  162.78
  -5  -7   1 4651.63  161.68
  -5   7   1 4483.35  170.28
   5   7  -1 4583.54  163.78
  -5   7   1 4487.35  170.98
   5   7  -1 4418.26  177.08
  -5   7   1 4700.73  175.48
  -4  -7   1   59.89    8.00
  -4  -7   1   75.39   10.80
   4  -7  -1   69.39   14.00
  -4  -7   1   65.69    8.90
  -4  -7   1   69.59    9.90
  -4   7   1   62.89   13.40
  -4   7   1   67.39   13.90
   4   7  -1   72.39   15.60
   4   7  -1   67.29    9.60
   4   7  -1   71.99   10.00
  -3  -7   1 2365.76   89.89
   3  -7  -1 2336.87   93.49
  -3  -7   1 2408.86   83.79
  -3  -7   1 2444.46   83.69
  -3   7   1 2533.35   96.99
   3   7  -1 2432.36   91.49
   3   7  -1 2429.56   84.89
   3   7  -1 2311.57   89.89
   3   7  -1 2556.94   99.59
  -3   7   1 2426.76   95.89
  -2  -7   1   55.29    9.30
  -2  -7   1   45.70    8.90
   2  -7  -1   48.40    9.00
   2   7  -1   49.90    8.40
  -2   7   1   53.69   10.50
   2   7  -1   44.20   11.30
  -2   7   1   54.89   10.00
   2   7  -1   32.90    6.90
  -1  -7   1  761.62   36.80
   1  -7  -1  803.72   33.90
  -1   7   1  792.32   34.90
  -1   7   1  851.21   39.60
   1   7  -1  781.52   46.80
   1   7  -1  771.02   36.80
   0  -7  -1  157.38    9.40
   0  -7   1  141.59    8.60
   0   7   1  152.58   21.20
   0   7   1  156.08   10.40
   0   7  -1  162.48    9.60
   0   7  -1  168.48   14.80
   0   7   1  158.78   14.40
   1  -7   1 1006.60   42.20
  -1  -7  -1 1040.90   37.00
  -1  -7  -1 1082.79   38.30
  -1   7  -1 1068.59   48.00
   1   7   1 1043.90   52.79
   1   7   1 1106.39   39.20
   1   7   1 1096.79   40.80
  -1   7  -1 1058.99   43.50
   2  -7   1 1380.26   55.39
  -2  -7  -1 1327.37   53.69
  -2  -7  -1 1341.57   47.20
  -2  -7  -1 1311.57   47.00
   2   7   1 1317.37   53.49
   2   7   1 1368.36   49.50
  -2   7  -1 1344.07   58.19
   2   7   1 1312.77   48.80
   2   7   1 1374.16   62.49
  -2   7  -1 1326.67   56.09
  -3  -7  -1 2038.00   73.59
   3  -7   1 2082.69   81.69
  -3  -7  -1 2036.00   75.99
   3   7   1 1932.21   75.29
   3   7   1 1971.00   86.89
  -3   7  -1 2091.49   83.49
   3   7   1 2091.59   75.69
   3   7   1 2020.00   76.29
  -3   7  -1 2070.09   83.49
   3   7   1 2052.29   74.59
   4  -7   1   -0.80    4.40
  -4  -7  -1    3.40    3.20
  -4  -7  -1   14.10    4.80
  -4   7  -1    6.80    6.50
   4   7   1   -2.50    3.40
   4   7   1    3.80    3.20
   4   7   1   10.10    7.60
   4   7   1   -0.70    3.30
  -4   7  -1   12.40    7.60
   5  -7   1 1487.35   67.99
  -5  -7  -1 1492.15   55.49
  -5  -7  -1 1398.76   60.19
   5   7   1 1431.16   61.49
  -5   7  -1 1391.56   65.89
   5   7   1 1485.15   73.89
  -5   7  -1 1379.36   69.39
  -5   7  -1 1525.25   67.89
  -6  -7  -1  208.78   19.90
   6  -7   1  245.48   27.90
  -6  -7  -1  225.68   13.60
  -6   7  -1  293.57   24.50
   6   7   1  289.57   36.40
   6   7   1  229.38   29.90
  -6   7  -1  247.98   24.60
  -6   7  -1  263.97   32.40
  -7  -7  -1  227.18   21.60
  -7  -7  -1  142.59   10.10
   7  -7   1  225.88   30.10
   7   7   1  239.98   34.60
  -7   7  -1  230.58   28.40
  -7   7  -1  215.88   21.80
  -7   7  -1  229.98   29.80
  -8  -7  -1  258.87   25.50
   8  -7   1  309.07   38.00
  -8   7  -1  226.48   23.00
   8   7   1  266.27   38.80
  -8   7  -1  219.18   30.70
  -8   7  -1  249.38   35.60
  -9  -7  -1   -7.40    6.30
   9   7   1   13.00   14.90
  -9   7  -1    0.50    6.80
  -9   7  -1  -15.20   10.30
 -10  -7  -1  169.28   27.50
  10   7   1  252.87   44.40
 -10   7  -1  170.98   31.20
 -11  -7  -1  114.79   25.20
  11   7   1  147.99   36.00
 -12  -7  -1  633.74   51.39
  12   7   1  626.24   64.49
 -13  -7  -1  153.88   34.00
  13   7   1   71.69   33.10
 -14  -7  -1   32.80   19.00
  14   7   1    6.50   15.80
 -15  -7  -1    9.20   15.80
  15   7   1   -2.80   18.30
 -16  -7  -1   26.20   23.00
  16   7   1   49.40   30.10
 -16  -8   1  -15.60   18.00
  16   8  -1  -16.10   25.60
 -15  -8   1   12.80   17.00
  15   8  -1    5.20   26.20
 -14  -8   1   31.70   19.30
  14   8  -1   22.80   28.30
 -13  -8   1   10.20   13.00
  13   8  -1  -17.00   19.20
 -12  -8   1  362.66   44.40
  12   8  -1  348.57   58.79
 -11  -8   1    7.70   11.00
  11   8  -1    3.80   16.30
 -10  -8   1  224.68   30.50
  10   8  -1  240.98   43.00
 -10   8   1  204.68   28.30
  -9  -8   1    3.00    9.00
  -9   8   1   20.30    8.50
   9   8  -1   10.80   13.50
  -9   8   1   -1.90   11.00
  -9   8   1   34.10   16.60
  -8  -8   1  491.95   34.10
   8  -8  -1  443.86   38.70
   8  -8  -1  505.25   37.80
  -8   8   1  462.85   36.00
   8   8  -1  507.75   45.80
  -8   8   1  404.46   38.60
  -8   8   1  479.75   40.40
  -7  -8   1   71.69   10.60
  -7  -8   1   45.40   11.80
   7  -8  -1   59.19   14.10
   7  -8  -1   50.59   15.70
  -7   8   1   81.29   16.30
   7   8  -1   68.69   14.30
   7   8  -1   68.39   22.30
  -7   8   1   63.49   20.00
  -7   8   1   60.99   15.80
   6  -8  -1  475.25   32.40
  -6  -8   1  511.15   26.30
  -6  -8   1  429.36   27.90
   6  -8  -1  440.06   35.70
  -6   8   1  493.65   34.50
  -6   8   1  492.45   38.60
   6   8  -1  482.35   39.60
   6   8  -1  426.86   28.60
  -6   8   1  537.75   37.20
  -5  -8   1   69.79   10.50
   5  -8  -1   67.49   13.70
   5  -8  -1   57.69   14.30
  -5  -8   1   85.69   11.90
  -5  -8   1   54.89   10.40
  -5  -8   1   58.59    9.40
  -5   8   1   73.99   14.50
   5   8  -1   70.09   17.10
  -5   8   1   88.39   17.30
   5   8  -1   65.79   10.90
  -5   8   1   60.99   15.00
  -4  -8   1  244.68   15.20
  -4  -8   1  237.58   14.40
  -4  -8   1  252.17   17.90
  -4  -8   1  246.88   15.20
   4  -8  -1  272.27   23.00
   4   8  -1  254.47   24.60
   4   8  -1  254.87   18.00
   4   8  -1  242.98   15.60
  -4   8   1  228.48   23.10
   4   8  -1  256.07   19.50
  -4   8   1  215.18   22.90
  -3  -8   1  122.49    7.30
   3  -8  -1  143.19   17.80
  -3  -8   1  133.19    7.50
  -3  -8   1  123.09   12.70
  -3   8   1  150.88   19.00
   3   8  -1  119.69    8.40
   3   8  -1  121.49   12.30
  -3   8   1  111.89   16.10
   3   8  -1  158.58   14.20
   3   8  -1  165.08   22.20
   3   8  -1  152.98    8.60
   2  -8  -1  177.08   14.90
  -2  -8   1  169.68   15.00
  -2  -8   1  196.48   16.10
   2   8  -1  184.58   15.30
  -2   8   1  189.58   16.10
  -2   8   1  173.48   17.50
   2   8  -1  212.88   19.60
  -1  -8   1   25.80    7.40
   1  -8  -1   19.20    5.30
   1   8  -1   16.50    6.10
  -1   8   1   25.30   10.00
  -1   8   1   20.30    5.80
   1   8  -1   28.10    8.80
  -1   8   1   14.20    6.60
   0  -8  -1 3090.69  105.19
   0  -8   1 3158.98  104.19
   0   8   1 2992.00  123.59
   0   8  -1 2959.80  113.99
   0   8   1 3049.59  113.89
   0   8  -1 3099.29  105.29
   0   8   1 2924.51  106.19
   1  -8   1  109.29    9.90
  -1  -8  -1  106.89    5.80
  -1  -8  -1  103.49    6.20
  -1   8  -1   91.09   11.10
   1   8   1   58.49   10.30
   1   8   1  111.69    8.90
   1   8   1  152.78   21.90
  -1   8  -1  112.39   15.40
   1   8   1   97.69    7.10
  -2  -8  -1 1621.44   55.89
   2  -8   1 1669.23   65.19
  -2  -8  -1 1637.04   55.79
  -2  -8  -1 1574.54   64.29
  -2   8  -1 1600.64   68.79
   2   8   1 1651.93   74.29
   2   8   1 1650.33   64.79
   2   8   1 1574.34   57.49
  -2   8  -1 1589.74   65.89
   2   8   1 1625.14   58.19
  -3  -8  -1  257.67   13.80
  -3  -8  -1  255.87   13.90
  -3  -8  -1  275.17   17.50
   3  -8   1  263.17   20.30
  -3   8  -1  240.68   20.80
   3   8   1  257.47   16.90
  -3   8  -1  292.77   22.50
   3   8   1  239.38   15.00
   3   8   1  253.67   17.00
   3   8   1  240.98   14.30
   3   8   1  246.78   23.40
  -4  -8  -1  859.31   36.70
  -4  -8  -1  836.92   36.60
  -4  -8  -1  840.62   36.40
   4  -8   1  796.92   43.20
  -4   8  -1  789.72   43.90
   4   8   1  819.92   37.60
  -4   8  -1  820.02   45.70
   4   8   1  821.22   37.50
   4   8   1  804.02   36.70
   4   8   1  781.62   48.00
   4   8   1  815.32   36.10
   5  -8   1   55.19   13.70
  -5  -8  -1   61.89    9.00
   5  -8   1   53.09   11.60
  -5  -8  -1   56.19   10.20
  -5   8  -1   44.70   12.90
   5   8   1   35.50    8.80
   5   8   1   54.29   16.50
   5   8   1   54.39    8.30
   5   8   1   64.59   10.40
  -5   8  -1   64.39   14.40
  -5   8  -1   68.89   15.10
   6  -8   1   61.49   13.10
  -6  -8  -1   30.40    9.30
   6  -8   1   24.30   12.90
  -6  -8  -1   48.20    7.20
   6   8   1   58.19   18.20
   6   8   1   32.40   10.70
  -6   8  -1   44.80   14.80
  -6   8  -1   15.20   11.60
  -6   8  -1   41.20   13.20
   7  -8   1  290.07   26.60
  -7  -8  -1  239.78   23.30
   7  -8   1  218.38   29.70
  -7  -8  -1  337.77   16.50
  -7   8  -1  298.87   29.70
  -7   8  -1  310.37   26.70
   7   8   1  360.56   46.20
   7   8   1  295.17   25.70
  -7   8  -1  290.97   30.20
   8  -8   1  282.67   34.70
  -8  -8  -1  317.57   28.60
   8  -8   1  403.36   32.10
  -8   8  -1  335.47   28.80
   8   8   1  381.86   39.80
  -8   8  -1  407.36   44.20
  -8   8  -1  363.16   35.40
  -9  -8  -1    3.80    8.70
   9   8   1    7.40   13.90
  -9   8  -1   -3.40   11.00
  -9   8  -1   -1.60    5.70
  -9   8  -1    0.50   12.80
 -10  -8  -1   32.60   14.10
  10   8   1   38.60   22.40
 -11  -8  -1  301.47   40.30
  11   8   1  237.08   47.50
 -12  -8  -1   90.59   23.10
  12   8   1   34.40   24.80
 -13  -8  -1   86.89   24.00
  13   8   1   45.40   30.60
 -14  -8  -1   33.70   19.30
  14   8   1   -1.90   20.10
 -15  -8  -1   -3.70   13.80
  15   8   1   30.20   27.80
 -16  -8  -1   19.20   20.40
  16   8   1  -16.20   20.50
 -16  -9   1  -27.40   16.20
  16   9  -1    7.00   27.00
 -15  -9   1   26.20   21.50
  15   9  -1    5.20   26.70
 -14  -9   1  151.08   33.80
  14   9  -1  116.89   40.00
 -13  -9   1   35.30   17.00
  13   9  -1    1.00   19.00
 -12  -9   1   69.29   21.80
  12   9  -1   33.40   24.10
 -11  -9   1   75.89   20.20
  11   9  -1   67.19   29.00
 -10  -9   1   92.69   21.60
 -10   9   1   73.49   20.40
  10   9  -1   52.29   23.30
  -9  -9   1    6.90    8.80
   9   9  -1   10.00   14.80
  -9   9   1   15.20   12.70
   8  -9  -1  346.67   40.60
  -8  -9   1  316.87   27.60
   8  -9  -1  363.66   31.00
   8   9  -1  360.96   39.00
  -8   9   1  364.96   41.10
  -8   9   1  346.87   36.00
  -8   9   1  333.27   31.50
  -7  -9   1  127.89   15.20
   7  -9  -1  151.08   24.70
   7  -9  -1  132.89   21.10
  -7  -9   1  102.99   16.80
  -7   9   1  170.78   24.80
   7   9  -1  155.58   20.60
   7   9  -1   99.49   23.90
  -7   9   1  127.09   21.90
  -7   9   1   54.19   19.00
  -6  -9   1   38.30    9.90
  -6  -9   1   45.80    9.20
  -6  -9   1   43.00    9.50
   6  -9  -1   28.60    9.10
   6  -9  -1   35.90   12.10
  -6   9   1   28.80   11.00
   6   9  -1   33.00    9.50
  -6   9   1   24.90   12.20
   6   9  -1   15.60   11.30
  -6   9   1   27.80   13.40
  -5  -9   1 1158.88   52.59
   5  -9  -1 1237.78   61.19
  -5  -9   1 1141.49   50.89
  -5  -9   1 1226.68   50.89
  -5  -9   1 1215.68   49.90
   5   9  -1 1232.28   52.89
   5   9  -1 1283.27   56.39
  -5   9   1 1313.27   60.89
   5   9  -1 1214.68   51.39
  -5   9   1 1298.87   64.29
  -5   9   1 1246.68   62.29
   5   9  -1 1181.38   65.49
  -4  -9   1  762.52   33.20
   4  -9  -1  821.42   40.50
  -4  -9   1  802.02   33.30
  -4  -9   1  812.62   32.00
  -4  -9   1  812.32   39.30
   4  -9  -1  823.92   43.80
   4   9  -1  765.22   47.10
  -4   9   1  833.32   46.30
   4   9  -1  838.42   40.70
   4   9  -1  770.52   38.60
  -4   9   1  811.12   45.60
   4   9  -1  848.62   34.10
   3  -9  -1  412.26   26.40
  -3  -9   1  418.56   25.00
   3  -9  -1  367.76   23.30
  -3   9   1  417.16   28.90
  -3   9   1  370.56   26.80
   3   9  -1  365.06   23.80
   3   9  -1  378.46   24.40
   3   9  -1  391.06   29.80
   2  -9  -1 1682.53   69.39
  -2  -9   1 1710.83   71.09
  -2  -9   1 1681.03   71.79
   2   9  -1 1822.52   78.79
   2   9  -1 1775.32   71.59
  -2   9   1 1801.62   75.79
  -2   9   1 1753.12   71.09
   1  -9  -1   49.20    8.00
  -1  -9   1   34.30    8.00
   1   9  -1   39.70    9.30
  -1   9   1   68.79   15.30
  -1   9   1   57.69   12.00
  -1   9   1   52.29    8.80
   1   9  -1   48.30   12.40
   0  -9  -1  387.96   18.00
   0  -9   1  383.86   21.60
   0  -9   1  383.56   17.10
   0   9  -1  330.67   27.90
   0   9   1  345.57   18.60
   0   9  -1  355.66   17.70
   0   9   1  431.66   33.20
   0   9  -1  367.26   18.10
   0   9   1  363.36   24.40
   0   9  -1  352.56   24.60
   1  -9   1   93.59   10.60
  -1  -9  -1   81.79    5.40
  -1  -9  -1   70.59    5.70
   1   9   1   92.09    9.60
   1   9   1   86.19   12.90
  -1   9  -1   91.19   11.40
   1   9   1  110.39   20.80
   1   9   1   69.79    6.30
  -1   9  -1   79.99   14.00
  -2  -9  -1  403.06   15.30
  -2  -9  -1  392.66   15.30
   2  -9   1  411.96   23.80
  -2  -9  -1  379.86   23.40
   2  -9   1  346.57   23.80
   2   9   1  400.66   17.00
  -2   9  -1  403.16   24.60
  -2   9  -1  365.86   26.10
   2   9   1  403.66   17.10
   2   9   1  332.67   22.70
   2   9   1  396.26   30.50
  -3  -9  -1   43.00    6.80
   3  -9   1   76.89   11.20
  -3  -9  -1   77.39    7.00
  -3  -9  -1   76.59   11.20
   3  -9   1   61.99   12.10
  -3   9  -1   70.39   13.40
   3   9   1  100.19    8.70
   3   9   1   71.49   11.00
   3   9   1   59.29    7.80
   3   9   1   90.69   17.50
  -3   9  -1   86.69   15.50
   3   9   1   57.89   10.20
  -4  -9  -1  379.96   20.90
   4  -9   1  389.56   25.00
   4  -9   1  359.86   26.90
  -4  -9  -1  393.16   20.80
  -4  -9  -1  410.16   23.00
  -4   9  -1  372.26   28.40
   4   9   1  391.56   22.40
   4   9   1  348.47   20.40
   4   9   1  411.46   22.30
  -4   9  -1  370.96   29.00
   4   9   1  401.66   33.00
   4   9   1  382.96   23.10
  -5  -9  -1 1139.59   47.40
   5  -9   1 1090.39   56.69
  -5  -9  -1 1149.58   49.10
  -5  -9  -1 1108.09   49.30
  -5   9  -1 1193.78   57.49
   5   9   1 1037.80   46.20
  -5   9  -1 1129.79   57.69
  -5   9  -1 1147.29   60.09
   5   9   1 1118.79   49.60
   5   9   1 1143.79   49.50
   5   9   1 1030.10   61.69
  -6  -9  -1   -6.00    4.50
   6  -9   1   -7.40    4.60
  -6  -9  -1   10.90    4.60
   6  -9   1    0.90    7.30
   6   9   1   32.50   15.60
   6   9   1    5.60    5.60
  -6   9  -1   20.10   11.30
   6   9   1    6.40    6.50
  -6   9  -1    4.30    9.40
   7  -9   1  929.91   51.89
  -7  -9  -1  952.20   49.90
  -7  -9  -1 1000.40   41.50
   7  -9   1  969.70   57.59
  -7   9  -1 1058.19   58.59
   7   9   1  919.21   49.80
  -7   9  -1  992.20   60.19
   7   9   1 1029.10   65.39
  -7   9  -1  910.41   53.19
   8  -9   1  264.37   35.30
  -8  -9  -1  252.47   29.00
   8  -9   1  249.68   30.80
  -8   9  -1  250.37   30.50
  -8   9  -1  262.27   36.00
   8   9   1  250.57   39.30
  -8   9  -1  249.78   33.40
  -9  -9  -1  338.07   31.80
  -9   9  -1  386.66   48.10
   9   9   1  430.56   56.39
  -9   9  -1  379.96   31.90
 -10  -9  -1   33.60   15.60
 -10   9  -1   42.50   18.90
  10   9   1   39.00   21.60
 -11  -9  -1   18.90   13.20
  11   9   1   41.70   24.70
 -12  -9  -1   90.79   24.00
  12   9   1   93.09   32.60
 -13  -9  -1   60.19   21.30
  13   9   1   71.39   31.40
 -14  -9  -1   56.69   24.50
  14   9   1   25.20   23.10
 -15  -9  -1   14.10   18.70
  15   9   1   20.30   29.50
 -16  -9  -1    2.60   16.70
  16   9   1  -12.20   29.10
 -16 -10   1   -9.60   19.50
  16  10  -1  -15.10   29.60
 -15 -10   1   50.09   22.70
  15  10  -1   57.59   34.40
 -14 -10   1    7.60   15.60
  14  10  -1   -3.90   19.90
 -13 -10   1  147.79   31.50
  13  10  -1  130.89   42.10
 -12 -10   1   56.29   19.20
  12  10  -1   57.39   30.40
 -11 -10   1   -3.50    9.80
  11  10  -1   -5.30   16.20
 -10 -10   1  170.48   27.90
 -10  10   1  118.19   25.10
  10  10  -1  142.39   36.40
  -9 -10   1  618.34   42.80
   9  10  -1  676.93   57.29
  -9  10   1  718.43   55.89
  -9  10   1  691.03   46.90
  -8 -10   1  116.89   19.40
   8 -10  -1  143.09   23.30
   8 -10  -1  127.09   24.90
  -8  10   1   80.79   24.10
  -8  10   1  152.88   25.50
  -8  10   1  144.69   34.10
   8  10  -1  145.49   30.00
  -7 -10   1  245.58   21.20
   7 -10  -1  256.87   33.40
  -7 -10   1  250.87   18.70
   7 -10  -1  234.58   27.00
   7  10  -1  312.57   42.30
   7  10  -1  274.97   23.90
   7  10  -1  235.48   21.50
  -7  10   1  277.07   28.60
  -7  10   1  300.37   38.40
  -7  10   1  255.37   31.70
  -6 -10   1  379.36   24.30
   6 -10  -1  302.57   25.90
   6 -10  -1  349.96   30.80
  -6 -10   1  378.46   23.40
  -6 -10   1  335.17   23.40
  -6  10   1  339.57   31.90
   6  10  -1  367.96   34.40
   6  10  -1  382.76   26.90
  -6  10   1  372.36   31.20
   6  10  -1  350.36   23.20
  -6  10   1  309.37   29.50
  -5 -10   1  218.48   15.50
  -5 -10   1  240.98   16.10
  -5 -10   1  242.18   19.20
  -5 -10   1  242.78   16.30
   5 -10  -1  257.97   28.80
  -5  10   1  221.58   27.90
   5  10  -1  272.37   21.60
   5  10  -1  250.77   33.00
   5  10  -1  259.87   19.50
  -5  10   1  241.28   29.40
   5  10  -1  254.77   16.70
  -5  10   1  276.07   34.00
  -4 -10   1  442.06   26.90
   4 -10  -1  450.15   31.00
  -4 -10   1  454.15   19.10
   4 -10  -1  424.66   27.40
  -4 -10   1  454.75   20.70
  -4 -10   1  449.36   20.90
   4  10  -1  456.15   28.40
   4  10  -1  460.95   35.50
  -4  10   1  419.96   31.80
   4  10  -1  458.25   20.60
   4  10  -1  453.15   21.00
  -4  10   1  430.26   32.30
   4  10  -1  434.96   27.00
  -3 -10   1 2855.01  108.79
   3 -10  -1 2750.62  104.89
   3 -10  -1 2732.03  107.99
  -3 -10   1 2872.21  107.69
   3  10  -1 2892.81  108.19
   3  10  -1 2733.03  106.79
  -3  10   1 2762.22  113.19
   3  10  -1 2728.53  115.69
  -3  10   1 2784.12  110.39
   2 -10  -1  186.28   16.10
  -2 -10   1  195.98   17.90
  -2 -10   1  197.28   17.70
   2 -10  -1  190.58   15.00
  -2  10   1  188.08   22.40
   2  10  -1  217.08   18.30
  -2  10   1  168.68   16.10
   2  10  -1  202.58   26.80
   1 -10  -1 1400.16   55.39
   1 -10  -1 1426.36   54.69
  -1 -10   1 1327.27   60.79
   1  10  -1 1383.06   68.79
  -1  10   1 1388.46   56.69
   1  10  -1 1436.86   62.19
  -1  10   1 1381.46   63.09
  -1  10   1 1350.16   68.69
   0 -10  -1  854.21   34.80
   0 -10   1  896.31   34.20
   0 -10   1  845.12   33.80
   0  10   1  828.12   43.30
   0  10  -1  877.51   35.30
   0  10  -1  833.52   34.60
   0  10   1  923.71   37.60
   0  10   1  849.41   35.90
   0  10  -1  847.12   49.80
   0  10   1  788.32   50.59
   0  10  -1  879.61   44.50
  -1 -10  -1  210.88   11.70
   1 -10   1  215.18   14.60
  -1 -10  -1  185.18   10.00
   1 -10   1  203.68   13.40
   1  10   1  195.88   11.10
   1  10   1  249.18   31.80
  -1  10  -1  205.08   15.20
  -1  10  -1  232.68   20.70
   1  10   1  230.48   19.10
   1  10   1  206.08   13.60
  -1  10  -1  198.48   20.40
   2 -10   1  805.32   35.30
  -2 -10  -1  716.23   37.40
   2 -10   1  785.12   37.40
   2  10   1  786.22   47.40
  -2  10  -1  730.53   37.80
   2  10   1  744.83   28.60
  -2  10  -1  791.22   42.60
  -3 -10  -1  514.15   29.70
  -3 -10  -1  533.65   22.00
   3 -10   1  480.05   30.40
   3 -10   1  516.05   28.50
  -3 -10  -1  529.25   22.20
   3  10   1  476.55   28.40
   3  10   1  544.95   38.80
  -3  10  -1  523.95   32.50
   3  10   1  507.35   22.80
   3  10   1  504.75   22.00
  -3  10  -1  506.95   33.30
   4 -10   1 1045.70   51.09
  -4 -10  -1  990.40   45.20
   4 -10   1  946.21   46.50
  -4 -10  -1  980.70   41.00
  -4 -10  -1  987.00   40.80
  -4  10  -1 1003.20   53.39
   4  10   1  979.20   41.80
  -4  10  -1  983.80   52.59
   4  10   1  994.20   44.90
   4  10   1  991.80   45.30
   4  10   1  961.60   40.70
   4  10   1 1016.30   58.09
   5 -10   1   65.89   13.40
  -5 -10  -1  102.29   13.70
  -5 -10  -1  102.09   13.70
   5 -10   1   98.69   18.50
  -5 -10  -1  114.59   14.00
   5  10   1   65.89   18.40
   5  10   1  127.39   15.60
  -5  10  -1  119.89   21.70
   5  10   1  105.69   14.30
   5  10   1   99.29   13.30
   5  10   1  113.39   13.60
  -5  10  -1  122.99   21.00
  -6 -10  -1   24.20    7.90
   6 -10   1   21.60   10.10
   6 -10   1   23.70   11.50
  -6 -10  -1   33.70    7.60
  -6 -10  -1   39.20   10.40
   6  10   1   24.40    7.10
   6  10   1   28.70    8.60
   6  10   1   12.20   12.10
  -6  10  -1   18.40   10.80
   6  10   1   11.90    7.60
  -6  10  -1   27.30   10.80
  -6  10  -1   21.80   12.80
  -7 -10  -1  232.08   22.30
  -7 -10  -1  296.97   24.60
   7 -10   1  294.07   31.20
   7 -10   1  286.37   35.10
   7  10   1  247.48   21.40
   7  10   1  222.28   21.60
   7  10   1  252.97   38.20
  -7  10  -1  285.87   35.10
  -7  10  -1  216.18   31.90
  -7  10  -1  263.97   31.10
   8 -10   1   37.90   13.80
   8 -10   1   33.20   16.30
  -8 -10  -1   22.70   10.70
   8  10   1   22.10   15.90
  -8  10  -1   35.30   14.70
  -8  10  -1   36.40   14.20
  -9 -10  -1  554.44   40.20
  -9  10  -1  508.95   47.10
  -9  10  -1  576.74   40.80
   9  10   1  556.94   53.19
 -10 -10  -1   60.09   17.50
 -10  10  -1   80.29   19.10
  10  10   1   78.99   27.50
 -11 -10  -1    2.50    9.70
  11  10   1   -3.80   14.50
 -12 -10  -1   20.70   15.40
  12  10   1   52.19   28.20
 -13 -10  -1   83.09   25.00
  13  10   1  123.79   39.70
 -14 -10  -1   33.60   21.40
  14  10   1   16.10   31.00
 -15 -10  -1   30.00   20.50
  15  10   1    0.60   29.30
 -16 -10  -1    9.00   20.10
  16  10   1    2.90   27.60
  16  11  -1  -12.20   26.30
 -15 -11   1    6.70   20.30
  15  11  -1  -14.50   26.30
 -14 -11   1   21.30   16.50
  14  11  -1   17.30   26.10
 -13 -11   1   72.79   23.20
  13  11  -1   77.59   32.30
 -12 -11   1   49.60   17.70
  12  11  -1   64.69   30.20
 -11 -11   1    4.10   10.00
  11  11  -1   28.70   20.50
 -10 -11   1   52.89   16.60
 -10  11   1   52.19   19.70
  10  11  -1  147.49   35.40
  -9 -11   1  172.68   24.80
  -9  11   1  212.78   37.70
  -9  11   1  140.79   27.00
   9  11  -1  222.98   41.50
   8 -11  -1   -1.30    9.80
   8 -11  -1    1.30   11.50
  -8 -11   1    1.90    6.10
  -8  11   1    8.60   12.30
  -8  11   1   -2.20    8.30
   8  11  -1  -18.90    7.70
  -7 -11   1   23.50    9.00
  -7 -11   1   27.10    8.40
   7 -11  -1   32.80   13.80
   7 -11  -1   22.20   10.50
  -7  11   1   38.60   16.50
   7  11  -1   16.70   12.50
   7  11  -1   23.80   10.10
   7  11  -1   34.00   10.50
  -7  11   1   14.00   16.70
  -7  11   1   51.09   15.70
  -6 -11   1   72.29   11.90
   6 -11  -1   87.79   19.40
  -6 -11   1   67.49   12.30
  -6 -11   1   70.79   12.20
   6  11  -1   47.30   16.40
  -6  11   1   59.79   16.70
  -6  11   1   52.49   14.50
   6  11  -1   78.49   12.40
   6  11  -1   61.19   13.50
   6  11  -1   82.49   13.60
  -6  11   1   96.39   20.20
  -5 -11   1   -0.20    3.90
  -5 -11   1    5.00    3.70
  -5 -11   1   -4.00    2.60
   5 -11  -1   11.30    7.60
  -5 -11   1    2.10    5.10
   5 -11  -1   -4.80    6.20
  -5  11   1    1.10    7.90
   5  11  -1    7.80    4.50
   5  11  -1    4.30    4.90
  -5  11   1    2.90    8.20
   5  11  -1   -1.20    4.30
   5  11  -1    6.00    4.00
   5  11  -1   14.30    9.90
  -4 -11   1  348.37   24.40
  -4 -11   1  330.47   16.40
   4 -11  -1  355.46   27.40
   4 -11  -1  350.46   24.10
  -4 -11   1  338.97   16.20
   4  11  -1  345.67   24.60
   4  11  -1  371.96   24.80
   4  11  -1  347.37   30.80
   4  11  -1  322.67   15.40
  -4  11   1  340.67   29.30
  -4  11   1  313.87   28.10
   3 -11  -1  159.48   15.20
   3 -11  -1  136.89   17.30
  -3 -11   1  178.68   22.00
  -3 -11   1  157.08   16.60
  -3  11   1  172.68   21.80
   3  11  -1  170.48   16.70
   3  11  -1  202.88   28.90
  -3  11   1  135.89   20.00
   3  11  -1  161.68   16.40
   2 -11  -1   66.99   11.50
   2 -11  -1   62.89   10.10
  -2 -11   1   61.29   12.70
   2  11  -1   92.69   19.20
   2  11  -1   73.19   13.10
  -2  11   1   67.59   11.60
  -2  11   1   80.59   16.10
   1 -11  -1   78.89   10.10
  -1 -11   1   66.59   12.90
   1 -11  -1   84.09   11.10
   1  11  -1   81.69   17.90
  -1  11   1   64.09   10.90
   1  11  -1   70.29   13.20
  -1  11   1   68.79   13.60
  -1  11   1   80.39   18.50
   0 -11  -1  212.58   23.80
   0 -11  -1  182.78   12.50
   0 -11   1  191.38   11.40
   0 -11   1  180.68   11.60
   0 -11   1  185.78   12.10
   0 -11  -1  197.08   12.90
   0  11  -1  190.58   12.70
   0  11   1  219.38   14.70
   0  11  -1  194.88   12.50
   0  11   1  216.38   19.80
   0  11  -1  230.68   24.50
   0  11   1  224.18   31.50
   0  11  -1  242.58   21.30
   0  11   1  178.18   13.10
  -1 -11  -1  454.65   19.40
   1 -11   1  417.96   23.20
   1 -11   1  451.45   22.20
  -1 -11  -1  446.16   18.60
  -1 -11  -1  464.55   21.20
  -1  11  -1  434.36   32.30
   1  11   1  399.96   21.50
   1  11   1  462.15   29.10
   1  11   1  426.66   19.40
   1  11   1  405.96   35.90
  -1  11  -1  386.56   23.30
  -1  11  -1  453.55   30.90
   2 -11   1  422.96   25.20
  -2 -11  -1  373.96   16.10
  -2 -11  -1  394.76   26.20
  -2 -11  -1  404.86   15.80
   2 -11   1  444.46   23.70
   2  11   1  401.36   16.30
  -2  11  -1  377.96   29.40
  -2  11  -1  393.56   25.60
   2  11   1  400.46   34.10
   3 -11   1  695.73   34.00
  -3 -11  -1  654.03   26.10
   3 -11   1  646.14   36.40
  -3 -11  -1  624.84   35.40
  -3 -11  -1  653.53   25.80
   3  11   1  666.43   45.00
   3  11   1  651.03   26.10
  -3  11  -1  636.04   39.30
  -3  11  -1  605.54   36.90
   3  11   1  650.53   34.90
   3  11   1  586.04   25.10
   4 -11   1   59.59   11.50
  -4 -11  -1   39.90    7.20
  -4 -11  -1   27.80    6.10
   4 -11   1   42.10   11.00
  -4 -11  -1   61.79   11.10
   4  11   1   46.10    9.90
   4  11   1   62.39    9.10
   4  11   1   58.59   16.50
  -4  11  -1   45.10   13.20
   4  11   1   51.99   10.20
  -4  11  -1   53.59   14.10
   4  11   1   47.90    7.40
   5 -11   1   31.30   10.90
   5 -11   1   33.50    9.20
  -5 -11  -1   53.39   10.30
  -5 -11  -1   47.20    9.30
  -5 -11  -1   64.19   10.30
   5  11   1   55.89   10.10
  -5  11  -1   39.10   13.20
   5  11   1   52.59   10.20
   5  11   1   70.69   19.00
   5  11   1   65.39   10.50
   5  11   1   59.59   10.90
  -5  11  -1   48.10   13.80
  -6 -11  -1  369.56   25.60
   6 -11   1  395.36   33.50
  -6 -11  -1  369.56   23.50
  -6 -11  -1  415.66   26.90
  -6  11  -1  379.16   34.70
  -6  11  -1  446.56   34.20
  -6  11  -1  395.56   32.30
   6  11   1  391.66   25.40
   6  11   1  457.75   40.20
   6  11   1  411.66   26.90
   6  11   1  373.66   23.50
   6  11   1  435.36   27.50
   7 -11   1  925.61   52.49
  -7 -11  -1  947.11   49.10
   7 -11   1 1028.60   59.89
   7  11   1 1033.10   49.40
  -7  11  -1  930.41   60.29
   7  11   1  977.90   65.89
  -7  11  -1  949.90   56.89
   7  11   1  949.51   48.90
   8 -11   1  377.46   43.40
   8 -11   1  294.17   32.40
  -8 -11  -1  316.07   27.90
  -8  11  -1  382.56   36.90
   8  11   1  404.36   42.90
  -8  11  -1  278.07   29.70
  -9 -11  -1 1247.38   66.29
  -9  11  -1 1264.57   78.59
   9  11   1 1253.27   84.49
  -9  11  -1 1280.67   70.79
 -10 -11  -1   30.70   13.20
  10  11   1   25.00   18.80
 -10  11  -1   46.00   16.80
 -11 -11  -1  460.15   41.30
  11  11   1  595.34   75.29
 -12 -11  -1  137.69   28.60
  12  11   1  139.09   40.70
 -13 -11  -1   66.69   23.90
  13  11   1   75.49   36.20
 -14 -11  -1   24.20   19.40
  14  11   1    5.80   28.40
 -15 -11  -1   23.70   18.70
  15  11   1   13.80   25.70
  16  11   1   10.50   28.30
 -15 -12   1   65.19   25.90
  15  12  -1    3.50   23.50
 -14 -12   1    6.50   15.30
  14  12  -1   11.50   26.00
 -13 -12   1   86.79   26.40
  13  12  -1  108.99   41.20
 -12 -12   1   84.49   23.50
  12  12  -1   85.29   34.60
 -11 -12   1  295.97   38.00
  11  12  -1  292.17   52.09
 -10 -12   1    4.50    9.80
 -10  12   1   18.70   17.30
  10  12  -1   10.80   16.40
  -9 -12   1   18.30   10.30
  -9  12   1  -17.20   10.70
  -9  12   1   31.10   14.60
   9  12  -1   25.00   18.80
   8 -12  -1  156.68   30.30
  -8 -12   1  138.79   20.70
   8 -12  -1  123.49   21.80
  -8  12   1  171.08   30.40
  -8  12   1  131.49   26.00
   8  12  -1  169.38   35.80
   7 -12  -1   74.29   16.00
  -7 -12   1  107.99   15.40
  -7 -12   1   85.09   15.50
   7 -12  -1   99.19   21.20
   7  12  -1  106.99   15.80
  -7  12   1  136.59   27.40
  -7  12   1  113.89   22.30
   7  12  -1  103.09   27.50
   7  12  -1  127.59   19.90
   6 -12  -1 1071.99   59.09
  -6 -12   1  978.90   45.70
  -6 -12   1  994.40   48.80
  -6 -12   1  974.70   45.40
   6  12  -1  984.30   48.80
   6  12  -1 1008.80   51.59
  -6  12   1  988.40   58.49
   6  12  -1 1001.60   63.59
   6  12  -1  966.80   44.80
   6  12  -1 1017.90   44.30
  -6  12   1 1031.90   61.09
   5 -12  -1   50.09   14.40
   5 -12  -1   37.70   10.60
  -5 -12   1   36.20    7.00
  -5 -12   1   30.70    6.10
  -5 -12   1   43.70   10.90
  -5 -12   1   35.10    6.70
  -5 -12   1   45.70    7.40
   5  12  -1   29.70    9.90
  -5  12   1   61.39   16.50
   5  12  -1   49.50   15.90
   5  12  -1   46.00    7.60
   5  12  -1   49.60   12.00
   5  12  -1   51.99    7.50
  -5  12   1   15.70   11.20
   4 -12  -1  417.96   27.00
   4 -12  -1  376.46   29.10
  -4 -12   1  384.96   17.30
  -4 -12   1  361.76   17.60
  -4 -12   1  404.26   27.60
   4  12  -1  397.76   27.30
   4  12  -1  419.16   28.20
  -4  12   1  405.16   32.90
   4  12  -1  373.86   33.10
  -4  12   1  409.56   31.20
   3 -12  -1  986.50   47.20
  -3 -12   1  972.40   49.00
   3 -12  -1  960.80   44.10
  -3 -12   1  893.21   46.40
   3  12  -1  942.11   55.19
   3  12  -1  727.93   43.70
  -3  12   1  832.62   46.60
  -3  12   1  911.21   51.09
   3  12  -1  930.01   46.70
   2 -12  -1   53.79    9.70
  -2 -12   1   68.59   13.30
   2 -12  -1   57.09   11.20
   2  12  -1   48.60   11.50
   2  12  -1   38.30   13.10
  -2  12   1   72.29   13.40
  -2  12   1   36.50   11.80
   1 -12  -1  190.98   15.00
  -1 -12   1  166.18   17.60
   1 -12  -1  181.08   13.80
  -1  12   1  186.98   24.00
  -1  12   1  191.98   15.50
  -1  12   1  206.08   29.80
   1  12  -1  191.98   29.20
   1  12  -1  187.58   19.20
   0 -12   1    5.30    3.40
   0 -12  -1    8.00    4.20
   0 -12  -1    8.60    3.30
   0 -12   1    9.40    3.30
   0 -12  -1    2.70    3.70
   0 -12   1    1.00    2.50
   0  12   1    6.70    8.20
   0  12  -1    1.10    2.90
   0  12  -1   10.20    6.70
   0  12   1    3.00    4.30
   0  12  -1   13.60   10.90
   0  12  -1    5.00    3.10
   0  12   1   -2.10    3.10
   0  12   1    4.70    5.90
  -1 -12  -1   43.90    5.60
   1 -12   1   39.60    7.10
  -1 -12  -1   42.70    6.30
  -1 -12  -1   45.40    7.20
   1 -12   1   48.90    8.60
   1  12   1   42.30    7.70
  -1  12  -1   55.89   12.60
   1  12   1   52.89   11.40
  -1  12  -1   61.49   16.50
   1  12   1   39.40   14.90
  -1  12  -1   44.50    8.80
   1  12   1   45.30    6.20
   2 -12   1   75.99   11.50
  -2 -12  -1  103.89    6.90
   2 -12   1   95.09   13.70
  -2 -12  -1  102.29    6.00
  -2 -12  -1  103.09   16.00
  -2  12  -1   81.29   13.50
  -2  12  -1   98.39   17.10
   2  12   1  112.19   21.80
  -3 -12  -1  435.16   18.40
  -3 -12  -1  406.56   28.40
  -3 -12  -1  423.16   18.50
   3 -12   1  444.96   28.90
   3 -12   1  401.26   25.50
   3  12   1  481.65   38.00
  -3  12  -1  412.96   29.40
  -3  12  -1  400.86   31.40
   3  12   1  418.06   27.90
   4 -12   1    1.40    5.60
  -4 -12  -1    5.70    3.10
  -4 -12  -1    3.60    2.90
  -4 -12  -1   -1.50    4.50
   4 -12   1   -0.30    4.50
  -4  12  -1   -6.90    7.10
  -4  12  -1    9.00    8.80
   4  12   1    2.20    9.70
   4  12   1    2.90    2.90
   4  12   1    0.80    2.90
   4  12   1    0.80    4.40
  -5 -12  -1  659.93   35.50
   5 -12   1  629.54   41.10
  -5 -12  -1  663.83   32.10
  -5 -12  -1  658.53   32.60
   5 -12   1  695.93   39.00
   5  12   1  677.63   49.10
   5  12   1  641.44   31.80
  -5  12  -1  577.14   42.30
   5  12   1  662.33   31.10
   5  12   1  650.93   35.30
  -5  12  -1  638.74   44.00
   5  12   1  712.93   37.20
   6 -12   1    3.10    5.00
  -6 -12  -1    1.30    3.60
  -6 -12  -1    3.20    5.70
   6 -12   1   10.60    9.10
  -6 -12  -1    9.20    6.90
   6  12   1   -0.60   10.60
   6  12   1    5.90    6.20
   6  12   1    3.70    5.70
   6  12   1   12.70    6.50
  -6  12  -1   17.10   11.90
   6  12   1    2.90    5.70
   7 -12   1  558.74   38.70
  -7 -12  -1  589.64   35.10
   7 -12   1  544.95   42.90
   7  12   1  596.04   49.20
   7  12   1  601.64   35.40
  -7  12  -1  522.95   44.10
   7  12   1  551.74   33.00
  -7  12  -1  508.15   40.70
   7  12   1  517.95   34.00
   8 -12   1  331.17   42.00
   8 -12   1  256.27   30.80
  -8 -12  -1  321.07   26.70
   8  12   1  313.67   46.80
  -8  12  -1  244.48   32.60
  -8  12  -1  378.96   46.00
  -9 -12  -1   12.60    9.70
   9 -12   1   20.70   17.00
   9  12   1   49.99   23.80
  -9  12  -1   18.60   10.80
  -9  12  -1   32.40   17.60
 -10 -12  -1  873.81   55.29
 -10  12  -1  879.41   60.09
  10  12   1  893.81   72.39
 -11 -12  -1   95.09   21.70
  11  12   1  176.78   41.00
 -12 -12  -1  712.63   54.39
  12  12   1  632.14   68.19
 -13 -12  -1   18.60   14.80
  13  12   1   26.20   26.20
 -14 -12  -1   94.59   28.10
  14  12   1  113.39   42.80
 -15 -12  -1   12.30   18.10
  15  12   1   12.90   25.60
 -15 -13   1  333.97   50.39
  15  13  -1  179.58   51.59
 -14 -13   1    9.10   15.50
  14  13  -1   33.30   26.70
 -13 -13   1   -5.60   13.10
  13  13  -1    0.80   17.90
 -12 -13   1   37.30   16.50
  12  13  -1   33.30   25.00
 -11 -13   1    7.20   10.70
  11  13  -1   26.80   22.60
 -10 -13   1  236.28   31.20
  10  13  -1  213.48   41.90
 -10  13   1  201.38   33.80
  -9 -13   1  292.67   27.90
   9 -13  -1  293.87   41.90
  -9  13   1  334.47   34.20
   9  13  -1  157.48   36.10
  -9  13   1  319.07   44.20
   8 -13  -1  147.19   26.00
  -8 -13   1  163.18   22.00
   8 -13  -1  219.68   34.20
  -8  13   1  138.89   27.30
  -8  13   1  183.08   31.30
   8  13  -1  188.18   38.50
   7 -13  -1 1392.36   74.59
  -7 -13   1 1668.93   71.59
   7 -13  -1 1622.64   83.99
  -7 -13   1 1574.54   69.49
  -7  13   1 1675.33   87.29
   7  13  -1 1766.92   76.69
   7  13  -1 1571.44   67.09
   7  13  -1 1595.44   68.19
  -7  13   1 1675.53   85.49
   7  13  -1 1647.54   91.79
   6 -13  -1  136.19   24.10
  -6 -13   1  131.49   13.00
  -6 -13   1  114.59   15.00
  -6 -13   1  138.49   19.00
  -6 -13   1  112.19   12.60
   6 -13  -1  129.19   19.80
   6  13  -1  117.89   19.00
   6  13  -1  121.19   13.70
  -6  13   1  122.09   23.90
   6  13  -1  124.99   12.60
   6  13  -1  146.39   28.60
  -6  13   1  157.48   26.10
   6  13  -1  116.59   17.40
  -5 -13   1 2518.85   87.19
   5 -13  -1 2443.86  106.09
  -5 -13   1 2409.46   89.09
   5 -13  -1 2474.55  101.49
  -5 -13   1 2478.15  100.49
  -5 -13   1 2455.35   89.99
  -5 -13   1 2477.45   87.39
  -5  13   1 2352.56  107.79
   5  13  -1 2472.15  115.39
   5  13  -1 2421.66  100.09
   5  13  -1 2401.56   86.09
   5  13  -1 2625.04  102.39
  -5  13   1 2497.45  110.79
  -4 -13   1  419.66   28.90
   4 -13  -1  392.46   30.20
  -4 -13   1  415.26   17.50
  -4 -13   1  418.36   17.90
   4 -13  -1  411.46   28.10
   4  13  -1  410.76   29.00
  -4  13   1  410.96   34.00
  -4  13   1  405.86   32.60
   4  13  -1  438.36   37.10
   4  13  -1  404.76   28.80
  -3 -13   1  787.02   44.90
  -3 -13   1  788.72   43.40
   3 -13  -1  778.12   39.70
   3 -13  -1  784.32   42.40
  -3  13   1  717.43   42.40
  -3  13   1  759.12   47.40
   3  13  -1  868.51   53.49
   2 -13  -1  264.57   18.80
   2 -13  -1  254.17   19.90
  -2 -13   1  190.88   20.00
  -2  13   1  202.68   19.10
   2  13  -1  258.97   33.60
  -2  13   1  249.18   25.10
   2  13  -1  248.08   22.60
   1 -13  -1  257.27   17.10
  -1 -13   1  227.68   21.40
   1 -13  -1  217.18   16.70
  -1 -13   1  241.48   12.40
  -1 -13   1  239.38   11.00
  -1  13   1  244.38   23.50
  -1  13   1  255.47   18.40
  -1  13   1  272.67   19.60
   1  13  -1  234.28   22.70
  -1  13   1  216.58   31.90
   1  13  -1  264.17   36.50
   0 -13   1  514.55   24.10
   0 -13  -1  513.05   25.90
   0 -13  -1  518.25   27.10
   0 -13  -1  587.24   26.20
   0 -13   1  507.65   24.80
   0 -13   1  519.15   25.30
   0  13  -1  540.45   36.20
   0  13  -1  527.25   25.30
   0  13  -1  599.14   43.80
   0  13   1  515.35   43.30
   0  13  -1  563.44   26.20
   0  13   1  573.74   28.60
   0  13   1  556.14   36.00
   0  13   1  517.55   26.20
   1 -13   1   -2.20    2.90
  -1 -13  -1    3.80    2.60
   1 -13   1    1.00    3.80
  -1 -13  -1    2.70    3.40
  -1 -13  -1    0.90    3.20
   1  13   1    7.10    3.20
   1  13   1    9.20    4.70
   1  13   1    9.00    9.60
  -1  13  -1   -0.90    6.60
  -1  13  -1   -1.20    5.40
  -1  13  -1    2.80    4.50
   1  13   1    9.50    6.60
   2 -13   1   30.70    7.50
  -2 -13  -1   38.30    5.10
  -2 -13  -1   40.10    4.80
   2 -13   1   32.40    8.90
  -2 -13  -1   48.50   11.10
  -2  13  -1   38.10   12.60
  -2  13  -1   35.20   10.40
   2  13   1   51.99   17.60
   2  13   1   21.40    8.10
   3 -13   1   18.30    6.30
  -3 -13  -1   33.90    4.50
  -3 -13  -1   45.10   11.60
   3 -13   1   35.80   10.60
  -3 -13  -1   30.50    4.80
   3  13   1   43.70   11.10
  -3  13  -1   25.40   10.00
  -3  13  -1   53.59   14.30
   3  13   1    1.20    8.60
  -4 -13  -1   16.90    4.60
  -4 -13  -1   10.50    6.40
  -4 -13  -1    7.80    3.20
   4 -13   1    7.60    6.60
  -4 -13  -1    9.60    3.50
   4 -13   1    0.70    6.30
   4  13   1   12.90    3.40
  -4  13  -1   -1.10    8.20
   4  13   1    9.70    7.10
   4  13   1    8.00   10.70
   4  13   1   11.00    3.80
  -4  13  -1   22.70   11.20
  -5 -13  -1  534.85   27.10
  -5 -13  -1  482.15   30.60
  -5 -13  -1  509.45   26.20
   5 -13   1  497.95   36.00
   5 -13   1  506.35   33.40
   5  13   1  539.85   44.00
   5  13   1  520.55   24.90
   5  13   1  480.55   30.40
  -5  13  -1  474.75   37.60
   5  13   1  473.85   25.20
  -5  13  -1  477.55   37.90
   5  13   1  473.35   30.60
   6 -13   1  123.89   20.20
   6 -13   1   67.69   18.00
  -6 -13  -1  108.09   15.40
  -6 -13  -1  122.09   16.40
  -6 -13  -1  130.89   16.80
   6  13   1  130.19   16.10
   6  13   1  142.29   28.60
   6  13   1  138.79   18.70
   6  13   1  135.79   15.70
  -6  13  -1  148.29   25.90
   6  13   1   91.29   15.30
  -6  13  -1   59.69   18.60
   7 -13   1  386.66   36.20
  -7 -13  -1  358.56   27.10
   7  13   1  367.76   26.50
  -7  13  -1  352.06   43.10
  -7  13  -1  378.16   35.10
   7  13   1  373.86   40.50
   7  13   1  372.16   25.50
   8 -13   1  184.68   27.60
   8 -13   1  171.18   30.40
  -8 -13  -1  168.28   23.00
  -8  13  -1  143.39   27.20
   8  13   1  205.68   38.70
   8  13   1  192.88   24.10
  -8  13  -1  170.38   29.20
   9 -13   1   15.90   14.50
  -9 -13  -1   24.90   11.40
   9  13   1    8.40    9.80
  -9  13  -1   37.70   16.00
   9  13   1   17.00   16.10
  -9  13  -1   32.80   15.60
 -10 -13  -1   31.00   13.50
  10  13   1   16.40   19.70
 -10  13  -1   54.69   27.60
 -10  13  -1   33.80   19.10
 -11 -13  -1  217.78   33.10
  11  13   1  193.98   45.80
 -12 -13  -1   -2.40   11.10
  12  13   1   15.20   24.60
 -13 -13  -1  115.09   26.90
  13  13   1  115.99   41.80
 -14 -13  -1   10.30   16.00
  14  13   1   -8.90   24.70
 -15 -13  -1    4.90   17.60
  15  13   1   -3.60   26.70
 -15 -14   1  155.98   35.90
  15  14  -1   87.59   42.40
 -14 -14   1   82.69   27.90
  14  14  -1   25.70   28.70
 -13 -14   1   39.30   19.30
  13  14  -1   32.40   30.50
 -12 -14   1    3.00   11.40
  12  14  -1  -11.10   19.40
 -11 -14   1    6.60   10.30
 -11  14   1    9.40   14.40
  11  14  -1   -5.60   14.40
 -10 -14   1   -5.40    7.30
 -10  14   1  -12.10   12.70
  10  14  -1   14.30   17.40
 -10  14   1   18.90   16.60
   9 -14  -1   68.49   21.20
  -9 -14   1  194.18   25.80
  -9  14   1  131.69   26.10
   9  14  -1  104.89   29.20
  -9  14   1  112.19   27.80
   8 -14  -1  489.25   43.40
   8 -14  -1  480.85   39.20
  -8 -14   1  487.55   33.10
   8  14  -1  429.26   45.10
  -8  14   1  413.86   42.10
  -8  14   1  473.45   43.40
   8  14  -1  443.36   30.30
  -7 -14   1  215.28   19.70
  -7 -14   1  206.48   21.30
   7 -14  -1  215.38   31.70
   7  14  -1  249.28   29.40
  -7  14   1  259.77   37.20
   7  14  -1  232.08   18.40
   7  14  -1  225.78   18.10
   7  14  -1  216.78   37.80
  -7  14   1  294.27   39.10
  -6 -14   1  693.33   34.70
  -6 -14   1  662.33   34.40
  -6 -14   1  652.63   39.50
   6 -14  -1  672.33   47.30
  -6 -14   1  693.83   31.90
   6 -14  -1  702.13   43.60
  -6  14   1  717.63   50.09
   6  14  -1  720.13   31.00
  -6  14   1  661.93   48.70
   6  14  -1  699.33   31.30
   6  14  -1  803.42   56.69
   6  14  -1  734.03   42.50
   6  14  -1  652.03   39.60
  -5 -14   1  181.38   12.60
  -5 -14   1  192.38   13.70
   5 -14  -1  183.98   25.50
  -5 -14   1  180.58   22.30
  -5 -14   1  202.38   11.90
   5 -14  -1  166.48   22.00
  -5 -14   1  178.18   11.20
   5  14  -1  178.08   23.10
  -5  14   1  238.48   31.20
   5  14  -1  227.28   33.70
  -5  14   1  222.38   31.40
   5  14  -1  206.88   24.60
   4 -14  -1  170.78   22.50
  -4 -14   1  198.58   23.90
   4 -14  -1  152.78   19.90
   4  14  -1  163.38   20.90
   4  14  -1  220.78   33.80
   4  14  -1  194.18   23.80
  -4  14   1  216.18   29.50
  -4  14   1  177.78   26.20
   3 -14  -1  133.69   19.50
  -3 -14   1  113.49   18.90
  -3 -14   1  142.29   21.30
   3 -14  -1  135.19   17.30
   3  14  -1  195.28   31.70
  -3  14   1  138.59   20.60
  -3  14   1  182.78   25.90
  -2 -14   1   84.99   15.10
   2 -14  -1   71.69   12.10
   2 -14  -1   63.39   11.90
  -2  14   1   80.79   14.60
  -2  14   1   50.69   14.60
   2  14  -1   69.49   15.30
   2  14  -1  117.59   24.40
  -1 -14   1   17.70    9.60
  -1 -14   1   12.20    4.20
   1 -14  -1   14.20    6.20
  -1 -14   1   15.30    3.30
   1 -14  -1   15.60    5.80
  -1 -14   1    4.90    3.60
  -1  14   1   18.70    6.70
   1  14  -1   18.40   13.90
  -1  14   1   12.00   10.60
  -1  14   1   16.30    6.40
  -1  14   1   31.50   11.90
   1  14  -1    8.50    7.00
   0 -14  -1  145.99   12.70
   0 -14   1  127.99   11.70
   0 -14  -1  149.69   11.90
   0 -14   1  114.59   10.20
   0 -14   1  134.89   11.10
   0 -14  -1  159.28   13.60
   0  14   1  157.88   28.50
   0  14  -1  145.99   12.00
   0  14   1  108.19   18.50
   0  14  -1  168.38   29.10
   0  14  -1  144.89   21.80
   0  14   1  169.38   14.40
   0  14   1  138.49   12.50
   0  14  -1  137.59   11.50
  -1 -14  -1  190.68   14.20
   1 -14   1  165.78   14.40
  -1 -14  -1  169.98   11.00
   1 -14   1  172.68   14.00
  -1 -14  -1  163.98   12.60
   1  14   1  192.78   23.80
  -1  14  -1  190.18   15.60
  -1  14  -1  178.28   24.80
   1  14   1  167.88   13.80
  -1  14  -1  176.88   15.50
  -1  14  -1  200.38   30.50
   1  14   1  197.58   32.40
   1  14   1  157.48   10.90
  -2 -14  -1   44.50    5.90
  -2 -14  -1   39.60    5.30
   2 -14   1   36.80    9.70
   2 -14   1   34.90    8.10
  -2 -14  -1   42.10   11.50
   2  14   1   43.00   12.20
  -2  14  -1   27.20    8.90
  -2  14  -1   45.30   12.60
   2  14   1   53.09   18.10
  -3 -14  -1   32.20    4.80
  -3 -14  -1   38.50    5.60
  -3 -14  -1   52.79   12.10
   3 -14   1   52.39   10.60
   3 -14   1   25.30    9.90
   3  14   1   60.89   13.20
   3  14   1   76.59   20.80
  -3  14  -1   41.80   12.40
  -3  14  -1   12.90   10.80
  -4 -14  -1  252.27   14.80
   4 -14   1  233.98   21.70
  -4 -14  -1  232.68   21.80
  -4 -14  -1  259.67   23.30
  -4 -14  -1  277.17   13.50
  -4 -14  -1  257.97   15.30
   4 -14   1  252.07   24.80
   4  14   1  310.27   41.60
  -4  14  -1  249.08   32.30
  -4  14  -1  267.27   27.10
   4  14   1  243.68   22.60
  -5 -14  -1  374.96   22.90
  -5 -14  -1  384.96   20.50
  -5 -14  -1  394.06   27.80
  -5 -14  -1  380.76   21.90
   5 -14   1  422.26   33.10
   5 -14   1  398.46   29.90
   5  14   1  395.96   19.70
   5  14   1  370.06   27.80
   5  14   1  421.66   40.80
  -5  14  -1  434.36   36.70
   5  14   1  374.46   20.20
  -5  14  -1  393.86   34.10
  -6 -14  -1  237.28   18.30
  -6 -14  -1  236.58   18.70
  -6 -14  -1  207.98   18.10
  -6 -14  -1  225.08   20.40
   6 -14   1  190.38   28.40
   6 -14   1  254.27   28.70
   6  14   1  221.38   16.30
  -6  14  -1  233.18   32.00
  -6  14  -1  280.67   36.20
   6  14   1  316.27   44.00
   6  14   1  195.58   20.00
   6  14   1  215.18   16.90
   6  14   1  223.38   21.40
   7 -14   1  115.59   24.10
  -7 -14  -1   57.79   12.80
   7  14   1   90.99   15.00
   7  14   1   96.49   14.10
  -7  14  -1   78.99   20.80
  -7  14  -1   75.19   19.70
   7  14   1   44.50   19.40
   8 -14   1   82.69   21.60
   8 -14   1   62.49   17.60
  -8 -14  -1  114.29   18.70
   8  14   1  111.89   18.50
  -8  14  -1   78.29   20.30
   8  14   1  163.38   36.10
  -8  14  -1  118.39   26.30
  -9 -14  -1   54.49   15.90
   9 -14   1   55.19   21.10
   9  14   1   63.99   16.10
  -9  14  -1   70.49   21.60
   9  14   1   21.20   17.40
  -9  14  -1   54.39   20.60
 -10 -14  -1    2.60    9.90
  10  14   1   14.70   16.30
  10  14   1    4.40   10.60
 -10  14  -1   28.10   18.30
 -10  14  -1    3.20   15.30
 -11 -14  -1  120.19   24.80
  11  14   1   61.89   29.20
  11  14   1  101.89   24.50
 -12 -14  -1    4.70   12.70
  12  14   1  -12.50   17.60
  12  14   1    0.20   13.50
 -13 -14  -1   12.50   17.40
  13  14   1   13.40   17.60
  13  14   1    7.30   25.40
 -14 -14  -1   21.70   18.40
  14  14   1   23.00   19.60
  14  14   1   20.00   26.70
 -15 -14  -1    7.90   17.70
  15  14   1    1.80   18.90
  15  14   1   20.90   33.60
 -15 -15   1    5.50   16.80
  15  15  -1   -8.40   17.00
  15  15  -1    8.30   28.20
 -14 -15   1   92.99   27.30
  14  15  -1   71.39   24.20
  14  15  -1   40.70   28.70
 -13 -15   1   -3.40   13.00
  13  15  -1   29.70   28.30
  13  15  -1    2.40   13.90
 -12 -15   1   31.80   16.90
  12  15  -1   23.90   16.00
  12  15  -1   -1.90   18.90
 -11 -15   1   42.90   16.30
  11  15  -1   37.90   14.60
 -11  15   1   48.50   18.90
  11  15  -1   73.49   30.00
 -10 -15   1   -3.10    8.30
  10  15  -1   11.70   17.90
 -10  15   1   13.70   17.20
 -10  15   1    7.50   15.20
  10  15  -1   -1.60    9.30
  -9 -15   1  254.17   25.20
   9 -15  -1  264.97   40.30
   9  15  -1  256.37   24.50
  -9  15   1  295.37   42.10
   9  15  -1  215.98   44.10
  -9  15   1  259.37   38.00
   8 -15  -1    5.20   10.70
   8 -15  -1   28.70   12.20
  -8 -15   1    0.60    5.60
   8  15  -1   -2.00   13.30
   8  15  -1    7.20    9.70
   8  15  -1    3.90    5.70
  -8  15   1   16.60   15.40
  -8  15   1   33.80   15.80
   7 -15  -1  168.68   29.90
   7 -15  -1   79.99   17.50
  -7 -15   1  170.88   16.60
  -7  15   1  244.48   36.70
   7  15  -1  178.98   14.90
   7  15  -1  207.28   36.60
   7  15  -1  170.18   14.70
  -7  15   1  170.78   31.70
  -6 -15   1   10.50    4.40
  -6 -15   1   15.00    5.40
   6 -15  -1    8.30    8.60
   6 -15  -1   13.00   11.70
  -6 -15   1   12.40    7.90
  -6 -15   1    3.70    6.20
  -6  15   1    4.80    9.00
   6  15  -1   26.00   15.20
   6  15  -1    3.10    7.90
  -6  15   1   10.60   11.00
   6  15  -1    6.20    7.50
  -5 -15   1  447.16   19.50
  -5 -15   1  394.56   20.90
  -5 -15   1  471.25   33.00
  -5 -15   1  403.06   21.70
   5 -15  -1  501.35   33.50
   5 -15  -1  447.16   35.20
   5  15  -1  452.95   32.50
  -5  15   1  530.15   39.60
   5  15  -1  448.56   32.30
  -5  15   1  515.05   41.30
   5  15  -1  428.86   41.70
  -4 -15   1  431.06   32.20
   4 -15  -1  428.06   33.30
   4 -15  -1  491.15   31.90
   4  15  -1  485.05   42.40
  -4  15   1  458.55   35.90
   4  15  -1  517.45   34.90
  -4  15   1  465.25   38.00
   3 -15  -1  762.92   41.10
  -3 -15   1  771.02   47.00
  -3 -15   1  808.82   46.10
   3 -15  -1  769.72   43.70
  -3  15   1  783.42   45.00
  -3  15   1  863.51   52.39
   3  15  -1  763.82   54.59
  -2 -15   1  862.71   49.00
   2 -15  -1  845.72   43.00
   2 -15  -1  849.32   41.00
  -2  15   1  827.32   51.19
   2  15  -1  797.22   47.90
  -2  15   1  830.62   43.70
   2  15  -1  737.73   54.79
  -1 -15   1  837.12   33.90
   1 -15  -1  791.82   39.50
  -1 -15   1  816.92   32.60
  -1 -15   1  829.12   32.40
   1 -15  -1  790.82   38.50
  -1 -15   1  770.32   47.10
   1  15  -1  850.51   57.99
   1  15  -1  836.42   49.00
  -1  15   1  856.51   41.00
  -1  15   1  866.71   42.00
  -1  15   1  850.61   49.99
  -1  15   1  794.02   56.49
   0 -15   1   15.90    5.10
   0 -15   1   15.30    5.60
   0 -15  -1   31.30    6.90
   0 -15   1   25.50    6.10
   0 -15  -1   23.60    6.50
   0 -15  -1   19.70    5.70
   0 -15  -1   24.90    5.90
   0  15   1   21.30    6.10
   0  15  -1   28.90    6.50
   0  15  -1   50.39   17.20
   0  15   1   55.49   19.60
   0  15   1   26.90   10.10
   0  15   1   23.60    7.20
   0  15  -1   33.30    7.40
   0  15  -1   33.50   11.60
  -1 -15  -1  493.75   24.70
   1 -15   1  554.54   31.30
  -1 -15  -1  501.15   26.00
  -1 -15  -1  501.75   34.30
  -1 -15  -1  524.95   23.80
   1 -15   1  511.35   26.90
   1 -15   1  502.85   28.00
   1  15   1  551.84   46.40
  -1  15  -1  482.35   28.40
  -1  15  -1  548.45   29.40
  -1  15  -1  410.26   38.00
   1  15   1  478.65   22.70
   1  15   1  509.25   26.30
   1  15   1  527.65   36.70
  -1  15  -1  498.65   37.50
  -2 -15  -1   35.50    5.40
  -2 -15  -1   37.00    6.30
   2 -15   1   28.40    9.00
  -2 -15  -1   31.80   11.40
   2 -15   1   29.70    8.40
  -2  15  -1   30.10   12.10
   2  15   1   26.90   14.60
   2  15   1   42.90   12.20
  -2  15  -1   34.00    9.70
  -3 -15  -1   13.70    3.60
  -3 -15  -1    5.90    8.10
   3 -15   1   29.20   10.40
  -3 -15  -1   23.60    4.60
   3 -15   1   15.50    7.10
  -3  15  -1   20.60    9.20
   3  15   1   22.40   11.90
  -3  15  -1   18.90   10.30
   3  15   1   27.50    9.80
  -4 -15  -1  235.28   14.70
  -4 -15  -1  225.58   13.60
   4 -15   1  215.58   25.90
  -4 -15  -1  240.78   23.00
  -4 -15  -1  265.77   25.20
   4 -15   1  198.08   22.70
  -4  15  -1  272.37   34.20
   4  15   1  241.68   37.20
   4  15   1  211.48   22.00
  -4  15  -1  259.07   26.40
  -5 -15  -1    3.50    4.70
   5 -15   1    0.30    6.70
  -5 -15  -1    3.90    3.20
  -5 -15  -1    5.80    4.90
  -5 -15  -1    7.50    4.20
   5 -15   1   -2.00    6.70
   5  15   1   14.70   12.90
  -5  15  -1    5.50    9.90
   5  15   1   -4.70    6.10
  -6 -15  -1  777.22   39.80
   6 -15   1  887.11   49.20
   6 -15   1  791.52   52.39
  -6 -15  -1  861.41   40.00
  -6 -15  -1  863.81   45.40
  -6  15  -1  787.42   54.09
   6  15   1  783.72   36.70
   6  15   1  809.52   44.70
   6  15   1  782.02   60.29
   6  15   1  884.41   46.20
  -6  15  -1  793.92   52.89
   6  15   1  779.22   35.50
   7 -15   1   46.00   14.70
  -7 -15  -1   39.90   10.30
   7 -15   1   41.40   16.40
   7  15   1   57.89   11.20
  -7  15  -1   45.30   17.10
   7  15   1   63.79   12.20
   7  15   1   40.60   20.00
  -7  15  -1   62.79   18.60
  -8 -15  -1  271.97   25.10
   8 -15   1  348.97   37.90
   8 -15   1  297.67   40.70
   8  15   1  240.08   23.00
   8  15   1  306.37   49.40
  -8  15  -1  223.58   35.60
  -8  15  -1  337.77   45.60
   9 -15   1  217.28   36.40
  -9 -15  -1  216.38   28.20
   9 -15   1  289.37   43.20
  -9  15  -1  232.08   38.50
   9  15   1  241.38   24.50
  -9  15  -1  259.27   37.60
   9  15   1  191.78   41.50
 -10 -15  -1    2.50    9.50
 -10  15  -1  -13.80   14.20
  10  15   1    3.80   10.00
 -10  15  -1   12.80   16.40
  10  15   1   11.20   18.50
 -11 -15  -1   46.80   17.40
  11  15   1   46.40   24.70
  11  15   1   70.19   20.40
 -12 -15  -1   17.40   14.70
  12  15   1   28.70   23.10
  12  15   1   41.70   19.10
 -13 -15  -1   84.89   25.30
  13  15   1   67.79   23.70
  13  15   1   21.10   23.50
 -14 -15  -1   37.80   19.80
  14  15   1   38.50   21.10
  14  15   1   23.30   26.60
 -15 -15  -1  169.58   35.40
  15  15   1  117.09   44.60
  15  15   1  119.79   31.90
 -15 -16   1   -7.90   15.30
  15  16  -1   11.50   18.00
  15  16  -1    6.40   25.70
 -14 -16   1    7.20   16.00
  14  16  -1    7.50   22.80
  14  16  -1    6.60   15.20
 -13 -16   1    2.50   13.10
  13  16  -1    7.70   21.70
  13  16  -1    1.40   12.90
 -12 -16   1   -1.40   11.50
  12  16  -1    3.80   11.80
  12  16  -1   47.40   26.00
 -11 -16   1    8.30   12.60
  11  16  -1    6.60   18.40
 -11  16   1   11.90   16.60
  11  16  -1   19.40   13.10
 -10 -16   1  170.08   27.00
  10  16  -1  198.58   27.00
  10  16  -1  178.08   41.20
 -10  16   1  243.58   42.10
 -10  16   1  144.49   31.00
  -9 -16   1  235.38   28.30
   9 -16  -1  351.46   46.90
   9 -16  -1  275.17   39.60
  -9  16   1  301.87   42.30
   9  16  -1  256.87   47.70
  -9  16   1  281.97   40.00
   9  16  -1  229.28   22.80
  -8 -16   1  548.55   35.30
   8 -16  -1  592.84   48.90
   8  16  -1  569.34   30.90
  -8  16   1  598.64   50.69
  -8  16   1  550.34   50.39
   8  16  -1  543.35   53.09
   8  16  -1  552.94   30.90
   7 -16  -1  116.19   24.00
   7 -16  -1   90.89   19.30
  -7 -16   1   84.09   14.10
  -7  16   1   57.39   20.70
   7  16  -1   90.59    9.10
  -7  16   1  108.89   25.90
   7  16  -1   96.39   10.80
   7  16  -1   87.09   26.20
  -6 -16   1  602.34   30.90
   6 -16  -1  579.44   40.90
  -6 -16   1  639.34   29.00
  -6 -16   1  643.64   40.40
   6 -16  -1  675.13   47.40
  -6 -16   1  625.04   31.70
   6  16  -1  674.73   43.70
  -6  16   1  620.54   46.50
   6  16  -1  579.64   50.59
   6  16  -1  574.94   39.40
  -6  16   1  583.74   47.30
   5 -16  -1  137.19   22.70
  -5 -16   1  128.19   19.60
  -5 -16   1  113.49   10.00
   5 -16  -1  103.79   19.20
  -5 -16   1  108.89    9.60
  -5  16   1  119.19   23.90
   5  16  -1  107.09   18.60
   5  16  -1  105.39   18.40
   5  16  -1   94.59   24.20
  -5  16   1  113.59   24.60
   4 -16  -1 1120.69   56.79
   4 -16  -1 1201.48   61.39
  -4 -16   1 1199.48   61.29
  -4 -16   1 1171.78   62.79
  -4  16   1 1193.98   68.49
   4  16  -1 1161.68   72.79
  -4  16   1 1161.38   62.79
   4  16  -1 1165.48   60.69
  -3 -16   1 1344.57   69.69
   3 -16  -1 1314.67   61.49
  -3 -16   1 1293.17   66.89
   3 -16  -1 1463.95   66.19
   3  16  -1 1312.87   78.19
  -3  16   1 1466.75   75.19
  -3  16   1 1379.86   66.49
  -2 -16   1 2017.70   89.59
   2 -16  -1 1884.51   80.29
   2 -16  -1 1877.51   77.89
   2  16  -1 1861.61   99.59
   2  16  -1 1928.81   88.59
  -2  16   1 1795.72   89.99
  -2  16   1 1998.20   83.99
  -2  16   1 1919.41   81.59
   1 -16  -1  662.23   33.90
  -1 -16   1  671.13   43.10
  -1 -16   1  673.03   29.40
  -1 -16   1  632.44   28.20
   1 -16  -1  700.03   35.70
  -1 -16   1  647.44   28.30
  -1  16   1  714.53   46.10
   1  16  -1  709.63   53.99
  -1  16   1  671.13   53.29
  -1  16   1  737.03   37.60
   1  16  -1  684.73   44.90
  -1  16   1  693.53   36.10
   0 -16  -1 1014.10   43.40
   0 -16  -1  986.00   43.70
   0 -16  -1 1034.40   45.50
   0 -16   1  993.40   43.00
   0 -16   1 1030.30   42.10
   0 -16   1  962.40   42.50
   0 -16  -1 1041.80   45.90
   0  16  -1 1029.40   57.89
   0  16   1 1027.60   46.60
   0  16  -1 1010.40   65.59
   0  16  -1  914.31   41.60
   0  16  -1  994.50   43.30
   0  16   1 1072.39   58.29
   0  16   1  927.71   43.00
   0  16   1  961.50   66.59
  -1 -16  -1    3.30    4.00
   1 -16   1   11.20    6.00
   1 -16   1    7.00    4.70
   1 -16   1    4.20    5.90
  -1 -16  -1    3.40    6.70
  -1 -16  -1    4.20    4.30
   1  16   1    8.90    5.80
   1  16   1   18.50    9.00
  -1  16  -1   -3.20    8.60
  -1  16  -1   10.40    5.10
   1  16   1   17.80    4.60
  -1  16  -1    8.90    7.80
   1  16   1   17.40   15.60
  -1  16  -1    4.90    5.70
   2 -16   1  685.13   34.20
  -2 -16  -1  619.54   28.60
  -2 -16  -1  624.14   40.20
   2 -16   1  602.34   35.50
  -2 -16  -1  600.44   26.30
   2  16   1  570.64   50.39
  -2  16  -1  614.24   36.20
  -2  16  -1  691.63   45.90
   2  16   1  622.74   41.10
   3 -16   1   12.30    7.70
   3 -16   1   22.90    9.10
  -3 -16  -1   17.80    4.30
  -3 -16  -1   23.90   10.50
  -3 -16  -1   19.70    4.00
  -3  16  -1    3.20    7.70
  -3  16  -1   34.50   14.40
   3  16   1    2.00    4.70
   3  16   1    5.50    9.40
  -4 -16  -1   -1.00    6.50
  -4 -16  -1   -2.10    2.60
   4 -16   1    5.20    6.60
  -4 -16  -1    7.00    3.30
  -4 -16  -1    0.60    6.00
  -4 -16  -1    6.10    2.90
   4 -16   1    5.70    8.30
   4  16   1   -1.80    8.60
  -4  16  -1   -5.30    8.70
   4  16   1    2.10    7.40
  -4  16  -1   10.50    9.70
  -5 -16  -1  152.88   13.10
  -5 -16  -1  175.48   12.10
   5 -16   1  184.08   25.40
  -5 -16  -1  177.88   22.60
   5 -16   1  164.78   22.50
  -5 -16  -1  147.69   13.70
  -5  16  -1  137.99   24.40
  -5  16  -1  163.58   29.00
   5  16   1  175.88   23.60
   5  16   1  162.98   32.90
  -6 -16  -1   12.20    8.30
  -6 -16  -1    8.70    5.00
  -6 -16  -1   -1.20    5.40
   6 -16   1   15.20   11.80
   6 -16   1   -1.70    6.40
  -6  16  -1   12.50   11.40
   6  16   1    9.60    4.70
   6  16   1    3.80    3.70
   6  16   1    3.90   12.50
  -6  16  -1    4.50    9.00
   6  16   1    2.40    7.30
  -7 -16  -1  217.78   20.10
   7 -16   1  241.48   35.10
   7 -16   1  224.58   31.10
   7  16   1  193.28   16.70
   7  16   1  223.48   42.10
  -7  16  -1  231.68   36.30
   7  16   1  203.48   16.30
  -7  16  -1  238.58   35.20
  -8 -16  -1  242.88   28.20
   8 -16   1  264.07   37.30
   8  16   1  229.48   42.40
  -8  16  -1  232.48   36.80
   8  16   1  282.07   22.70
   9 -16   1   12.00   14.40
  -9 -16  -1   12.90    8.60
   9 -16   1    6.80   14.20
   9  16   1   27.80   12.10
   9  16   1   15.50   18.10
  -9  16  -1   26.60   18.00
  -9  16  -1   12.60   13.00
 -10 -16  -1   76.29   19.30
 -10  16  -1   96.39   26.80
  10  16   1   67.59   18.20
  10  16   1  136.99   38.00
 -10  16  -1   80.79   26.80
 -11 -16  -1   18.50   12.50
  11  16   1   27.30   13.60
  11  16   1    8.90   20.70
 -12 -16  -1   24.40   15.50
  12  16   1   57.39   20.20
  12  16   1   24.30   25.80
 -13 -16  -1   -3.60   12.60
  13  16   1    1.80   21.80
  13  16   1   -2.00   13.50
 -14 -16  -1  207.48   40.70
  14  16   1  115.39   29.10
  14  16   1  136.89   45.60
 -15 -16  -1    4.20   19.00
  15  16   1   14.40   20.70
  15  16   1   -4.20   27.10
 -15 -17   1    9.10   17.20
  15  17  -1   -2.20   16.80
  15  17  -1   19.70   31.00
 -14 -17   1  116.59   31.80
  14  17  -1  111.59   28.20
  14  17  -1   46.00   35.30
 -13 -17   1   19.70   15.50
  13  17  -1    3.10   22.50
  13  17  -1    0.10   13.70
 -12 -17   1    8.20   12.80
  12  17  -1   -2.30   10.80
  12  17  -1    8.60   20.20
 -11 -17   1   26.60   13.20
  11  17  -1   59.79   29.10
 -11  17   1   39.60   21.80
  11  17  -1   29.40   12.70
 -10 -17   1  238.78   30.60
  10  17  -1  304.27   53.99
 -10  17   1  281.37   42.30
 -10  17   1  210.98   43.20
  10  17  -1  234.58   27.20
  -9 -17   1    2.70    8.00
   9 -17  -1   29.20   16.50
   9 -17  -1   35.70   18.20
   9  17  -1   -3.40   15.30
  -9  17   1   23.20   17.30
  -9  17   1    9.80   13.00
   9  17  -1   18.00    9.10
  -8 -17   1  752.62   42.80
   8 -17  -1  762.72   57.39
   8  17  -1  729.63   63.79
  -8  17   1  815.42   59.69
  -8  17   1  823.12   61.49
   8  17  -1  724.43   34.90
   8  17  -1  783.12   35.10
   7 -17  -1    6.30   10.10
   7 -17  -1   11.60   12.00
  -7 -17   1   11.20    5.40
  -7  17   1   16.10   14.50
  -7  17   1   20.60   14.70
   7  17  -1   11.70   14.70
  -6 -17   1  204.78   16.00
   6 -17  -1  215.28   27.20
   6 -17  -1  252.67   33.80
  -6 -17   1  224.18   14.30
  -6 -17   1  196.98   15.30
  -6 -17   1  226.68   23.60
  -6  17   1  229.78   33.10
  -6  17   1  292.87   40.00
   6  17  -1  214.08   27.30
   6  17  -1  230.68   40.00
  -5 -17   1   68.89    7.90
  -5 -17   1   96.89   10.40
   5 -17  -1   76.99   15.90
  -5 -17   1   73.09   16.40
   5 -17  -1   69.59   16.70
  -5  17   1   82.09   22.10
   5  17  -1   69.39   15.10
   5  17  -1   85.89   25.20
  -5  17   1   34.30   14.10
  -4 -17   1  543.75   38.30
   4 -17  -1  473.65   36.10
   4 -17  -1  551.84   35.20
  -4 -17   1  545.45   39.90
  -4  17   1  515.25   39.40
   4  17  -1  550.04   38.40
  -4  17   1  475.95   41.90
   4  17  -1  560.24   47.40
   3 -17  -1   39.70   10.00
   3 -17  -1   29.50    9.80
  -3 -17   1   20.30   10.60
  -3 -17   1   46.00   14.20
   3  17  -1   24.00   14.50
   3  17  -1   40.10   13.20
  -3  17   1   37.10   13.10
  -3  17   1   60.79   13.60
  -2 -17   1 1300.17   66.99
   2 -17  -1 1155.58   55.19
   2 -17  -1 1230.68   58.29
  -2  17   1 1311.37   69.59
   2  17  -1 1219.38   76.99
  -2  17   1 1236.58   59.99
   2  17  -1 1264.67   66.79
  -2  17   1 1200.78   58.89
  -1 -17   1   77.19    9.60
   1 -17  -1  171.88   16.30
  -1 -17   1  111.19   20.10
  -1 -17   1   98.39   11.40
   1 -17  -1  123.69   16.30
   1 -17  -1  153.58   14.40
  -1  17   1  124.99   16.40
   1  17  -1  184.18   26.00
   1  17  -1  119.19   26.70
  -1  17   1  109.89   15.20
  -1  17   1  156.28   30.50
  -1  17   1  169.58   25.20
   0 -17   1   87.19   11.10
   0 -17   1   66.19   15.50
   0 -17  -1   78.59   11.10
   0 -17  -1   96.49   12.30
   0 -17  -1   86.29   12.90
   0 -17   1   81.09   11.10
   0 -17   1   95.79   12.20
   0 -17  -1   84.99   12.80
   0  17   1   94.19   26.80
   0  17   1  104.99   13.30
   0  17   1  102.09   14.70
   0  17  -1   96.99   25.10
   0  17   1   87.29   19.00
   0  17  -1  104.19   19.70
   0  17  -1   98.29   12.60
   0  17  -1  102.79   10.50
  -1 -17  -1   12.30    4.70
   1 -17   1   17.10    8.50
  -1 -17  -1   14.70    5.60
  -1 -17  -1   15.30    6.20
  -1 -17  -1   14.80    9.10
   1 -17   1   14.40    6.30
   1 -17   1   33.80    8.00
   1  17   1   35.60   16.60
  -1  17  -1   23.70    8.10
   1  17   1   12.70    6.80
   1  17   1   10.10    9.10
  -1  17  -1   28.20   14.90
  -1  17  -1   10.00   10.30
  -1  17  -1   18.80    7.40
   1  17   1   12.20    4.30
  -2 -17  -1   97.79   18.40
  -2 -17  -1  104.49   10.10
  -2 -17  -1  106.79   10.60
   2 -17   1  126.69   15.90
   2 -17   1  133.69   18.20
  -2 -17  -1  116.59    9.30
   2  17   1  149.19   23.20
   2  17   1  132.59   30.00
  -2  17  -1  113.59   23.30
  -2  17  -1  115.09   17.20
  -2  17  -1  101.39   16.60
  -3 -17  -1   31.90   12.90
   3 -17   1   20.40    9.70
  -3 -17  -1   20.50    5.00
  -3 -17  -1   28.50    4.90
   3 -17   1   11.40    7.40
  -3  17  -1   21.80   10.00
  -3  17  -1   25.70   12.60
   3  17   1   25.90   14.50
  -4 -17  -1    8.20    5.70
  -4 -17  -1    2.30    6.70
  -4 -17  -1    6.20    3.50
   4 -17   1   -3.60    5.50
   4 -17   1    5.40    7.30
  -4 -17  -1    1.80    2.80
   4  17   1    0.80    6.70
  -4  17  -1   -6.30    7.00
   4  17   1   -4.90    9.00
  -4  17  -1   -2.80    6.90
  -5 -17  -1  476.95   23.00
   5 -17   1  510.95   38.60
  -5 -17  -1  485.75   25.90
  -5 -17  -1  482.15   25.10
   5 -17   1  448.46   33.80
  -5 -17  -1  430.26   33.30
   5  17   1  469.15   34.90
  -5  17  -1  479.45   41.20
   5  17   1  439.46   44.90
  -5  17  -1  461.65   38.30
   6 -17   1  193.18   26.50
   6 -17   1  245.08   34.30
  -6 -17  -1  223.38   18.00
  -6 -17  -1  224.18   23.20
  -6  17  -1  240.18   34.60
  -6  17  -1  243.38   36.10
   6  17   1  236.58   27.40
   6  17   1  211.68   39.00
   7 -17   1  358.06   33.10
  -7 -17  -1  348.17   26.00
   7 -17   1  357.86   44.80
  -7  17  -1  334.07   42.60
  -7  17  -1  342.17   43.20
   7  17   1  352.96   50.49
   7  17   1  376.56   21.20
   7  17   1  362.76   20.50
   8 -17   1  245.28   37.80
  -8 -17  -1  225.08   26.30
   8  17   1  186.18   18.40
   8  17   1  197.48   26.80
  -8  17  -1  185.88   34.90
  -8  17  -1  184.68   34.10
   8  17   1  184.48   37.60
   9 -17   1  242.58   38.80
  -9 -17  -1  175.48   25.00
   9 -17   1  131.69   26.80
  -9  17  -1  213.68   38.60
   9  17   1  165.18   22.20
   9  17   1  127.09   34.60
  -9  17  -1  180.48   31.80
 -10 -17  -1  222.58   30.40
 -10  17  -1  131.39   32.90
  10  17   1  177.68   44.70
 -10  17  -1  207.48   40.70
  10  17   1  230.88   28.50
 -11 -17  -1  193.08   31.30
  11  17   1  132.29   40.70
 -11  17  -1  107.49   32.00
  11  17   1  168.38   27.00
 -12 -17  -1   34.60   18.40
  12  17   1   34.20   16.60
  12  17   1   50.89   27.90
 -13 -17  -1  210.98   35.80
  13  17   1  227.18   35.90
  13  17   1  316.57   64.39
 -14 -17  -1    3.60   16.30
  14  17   1   12.60   15.60
  14  17   1  -12.70   25.00
  15  17   1   13.90   30.80
  15  17   1   39.50   22.40
 -14 -18   1   10.10   17.50
  14  18  -1   16.20   28.30
  14  18  -1    9.00   15.20
 -13 -18   1   -1.10   14.30
  13  18  -1   -7.40   12.00
  13  18  -1   -3.30   20.20
 -12 -18   1  102.19   25.90
  12  18  -1  138.39   24.30
  12  18  -1  139.79   43.90
 -11 -18   1   -9.50   10.40
  11  18  -1   -3.90   17.70
 -11  18   1   -2.00   20.30
  11  18  -1    1.80   10.00
 -10 -18   1   14.90   10.20
 -10  18   1    9.40   24.30
  10  18  -1   21.60    9.90
 -10  18   1   28.10   17.50
  10  18  -1   21.10   20.30
   9 -18  -1  377.06   42.70
   9 -18  -1  413.46   51.29
  -9 -18   1  339.77   29.40
   9  18  -1  315.17   21.80
  -9  18   1  314.47   45.20
  -9  18   1  340.97   48.50
   9  18  -1  283.67   49.60
  -8 -18   1   61.49   14.60
   8 -18  -1   24.00   14.40
   8 -18  -1   37.70   19.00
  -8  18   1   47.00   22.00
   8  18  -1  119.59   32.20
  -8  18   1   44.90   21.10
  -7 -18   1  411.16   26.70
   7 -18  -1  450.75   37.90
   7 -18  -1  461.05   42.80
  -7  18   1  453.75   45.10
   7  18  -1  464.75   60.39
  -7  18   1  446.36   44.80
  -6 -18   1   58.39    8.30
  -6 -18   1   50.39    9.30
   6 -18  -1   38.10   13.60
  -6 -18   1   30.80   11.50
  -6 -18   1   54.79    9.10
   6 -18  -1   50.59   17.30
   6  18  -1   24.80   11.90
  -6  18   1   18.70   13.00
   6  18  -1   27.10   17.80
  -6  18   1   66.59   20.10
  -5 -18   1   35.20   12.20
   5 -18  -1   64.49   16.80
   5 -18  -1   19.00   10.40
  -5 -18   1   32.70    5.50
  -5 -18   1   35.40    6.90
   5  18  -1   43.80   20.70
   5  18  -1   39.60   13.40
  -5  18   1   24.80   14.60
  -5  18   1   19.20   12.40
   4 -18  -1   95.59   19.00
  -4 -18   1  130.59   22.30
   4 -18  -1  120.69   19.30
  -4 -18   1  124.59   24.00
   4  18  -1  132.09   31.40
   4  18  -1   86.69   18.80
  -4  18   1  101.59   20.70
  -4  18   1  116.59   24.40
  -3 -18   1  317.17   30.90
  -3 -18   1  280.97   28.20
   3 -18  -1  300.57   24.60
   3 -18  -1  296.57   26.70
   3  18  -1  286.47   29.20
  -3  18   1  291.77   30.70
  -3  18   1  287.47   27.00
   3  18  -1  365.46   39.30
  -2 -18   1  448.66   19.90
   2 -18  -1  460.85   31.40
   2 -18  -1  490.55   30.00
  -2 -18   1  471.65   37.60
  -2 -18   1  441.66   21.50
   2  18  -1  446.76   44.20
  -2  18   1  549.54   34.60
  -2  18   1  490.15   40.20
  -2  18   1  489.95   32.70
   2  18  -1  454.85   37.60
  -1 -18   1   22.70    5.00
  -1 -18   1   29.30    6.10
   1 -18  -1   31.90    8.40
  -1 -18   1   44.20   13.40
   1 -18  -1   31.40    9.00
  -1 -18   1   21.50    5.70
   1 -18  -1   28.60    7.60
  -1  18   1   19.10    8.70
  -1  18   1   28.80   13.20
   1  18  -1   14.60   14.70
  -1  18   1   29.60   17.60
  -1  18   1   48.60   10.80
   1  18  -1   20.80   11.40
   0 -18   1    4.80    5.80
   0 -18   1    6.00    5.20
   0 -18  -1   13.00    5.90
   0 -18  -1   15.70    7.50
   0 -18   1   21.70    7.00
   0 -18  -1   18.30    5.70
   0 -18   1   18.30    7.30
   0  18  -1    8.40    6.00
   0  18   1   16.40   13.70
   0  18   1   22.40    7.40
   0  18   1   12.60   10.40
   0  18  -1    2.70    7.50
   0  18   1   11.10    6.90
   0  18  -1   19.90   13.30
   0  18  -1   12.50    6.10
  -1 -18  -1  406.06   21.90
  -1 -18  -1  356.66   22.00
  -1 -18  -1  340.07   20.50
   1 -18   1  376.86   25.40
  -1 -18  -1  346.37   32.10
   1 -18   1  325.07   23.70
   1 -18   1  338.27   22.80
   1  18   1  424.36   56.39
  -1  18  -1  369.56   24.80
   1  18   1  347.17   21.40
  -1  18  -1  342.07   36.90
  -1  18  -1  411.86   36.80
   1  18   1  371.76   33.50
   1  18   1  366.36   18.60
  -1  18  -1  379.16   25.70
  -2 -18  -1  208.78   13.60
   2 -18   1  219.88   19.00
  -2 -18  -1  209.08   15.20
  -2 -18  -1  224.48   16.40
  -2 -18  -1  240.88   24.90
   2 -18   1  227.08   20.90
   2  18   1  240.88   41.40
  -2  18  -1  237.58   31.60
   2  18   1  233.98   30.80
  -2  18  -1  232.28   21.50
  -2  18  -1  206.68   21.00
   3 -18   1  274.17   22.90
   3 -18   1  272.97   25.10
  -3 -18  -1  266.67   16.00
  -3 -18  -1  281.67   28.30
  -3 -18  -1  275.07   15.20
  -3  18  -1  298.67   31.20
  -3  18  -1  298.97   26.40
   3  18   1  277.87   44.20
   4 -18   1  224.88   27.40
  -4 -18  -1  209.68   26.80
  -4 -18  -1  174.88   12.50
  -4 -18  -1  199.48   27.60
   4 -18   1  167.08   21.70
  -4 -18  -1  179.88   13.20
  -4  18  -1  195.48   28.10
  -4  18  -1  187.28   30.40
   4  18   1  178.48   26.10
   4  18   1  185.38   34.10
  -5 -18  -1  136.09   12.90
   5 -18   1  147.89   25.50
  -5 -18  -1  159.18   24.50
  -5 -18  -1  144.69   15.20
  -5 -18  -1  134.99   11.10
   5 -18   1  150.88   23.20
   5  18   1  165.08   23.90
  -5  18  -1  156.48   26.60
   5  18   1  148.39   34.60
  -5  18  -1  179.78   29.50
  -6 -18  -1  814.92   41.60
   6 -18   1  924.41   52.79
  -6 -18  -1  884.41   50.39
   6 -18   1  834.22   55.79
  -6  18  -1  817.82   57.39
   6  18   1  904.41   52.59
   6  18   1  797.22   65.59
  -6  18  -1  963.90   62.39
  -7 -18  -1  375.96   26.90
   7 -18   1  358.46   44.00
   7 -18   1  357.86   41.00
  -7  18  -1  376.46   46.40
  -7  18  -1  400.56   49.99
   7  18   1  383.26   54.39
  -8 -18  -1 1109.19   56.39
   8 -18   1 1156.38   72.59
   8 -18   1 1152.08   67.09
  -8  18  -1 1017.40   72.99
   8  18   1 1091.49   46.70
   8  18   1 1053.49   47.10
  -8  18  -1 1064.89   72.69
   8  18   1 1229.68   85.19
   9 -18   1  161.08   32.30
   9 -18   1   85.59   22.10
  -9 -18  -1  119.59   20.70
   9  18   1  126.29   18.30
   9  18   1   89.19   30.70
  -9  18  -1  137.09   34.20
  -9  18  -1  103.59   28.00
 -10 -18  -1  300.07   35.40
 -10  18  -1  267.87   42.60
  10  18   1  277.37   25.60
 -10  18  -1  290.37   49.70
  10  18   1  219.38   46.10
 -11 -18  -1    5.10    9.20
  11  18   1    5.80   11.20
 -11  18  -1   -6.30   15.90
  11  18   1    2.00   17.30
 -12 -18  -1  106.19   25.80
  12  18   1   49.30   17.70
  12  18   1   57.29   34.40
 -13 -18  -1    7.80   15.70
  13  18   1    0.80   13.50
  13  18   1  -32.30   19.20
 -14 -18  -1    3.80   16.80
  14  18   1    3.90   16.60
  14  18   1   -6.60   27.60
 -14 -19   1  -10.00   15.20
  14  19  -1    3.70   14.50
  14  19  -1  -21.20   20.00
 -13 -19   1  118.39   26.60
  13  19  -1  111.59   23.00
  13  19  -1  109.89   45.10
 -12 -19   1   15.10   15.20
  12  19  -1   21.10   25.60
  12  19  -1   -1.30   10.10
 -11 -19   1   43.50   15.60
 -11  19   1   40.30   34.00
  11  19  -1   72.39   30.50
  11  19  -1   46.40   13.40
 -11  19   1   21.40   25.10
 -10 -19   1    9.10    9.70
 -10  19   1    3.10   22.20
 -10  19   1   13.30   18.70
  10  19  -1    4.50    7.80
  10  19  -1   -6.10   14.80
   9 -19  -1   12.00   14.80
   9 -19  -1    1.70   10.00
  -9 -19   1   16.00   10.40
  -9  19   1   22.40   18.10
   9  19  -1    5.10   17.00
  -9  19   1   13.50   17.40
   8 -19  -1   31.70   17.30
   8 -19  -1   21.40   13.20
  -8 -19   1   -4.20    8.10
   8  19  -1   -0.90   12.80
  -8  19   1    2.50   15.50
  -8  19   1   -0.70   11.40
  -7 -19   1   76.99   12.90
   7 -19  -1   73.79   19.30
   7 -19  -1   32.40   16.60
  -7  19   1   51.79   19.60
   7  19  -1   53.09   22.10
  -7  19   1   65.99   23.30
   6 -19  -1    5.30    9.90
  -6 -19   1   11.10    5.60
   6 -19  -1   11.40   11.10
  -6 -19   1   10.00    6.20
  -6 -19   1   19.70    4.90
  -6 -19   1   41.10   12.10
  -6  19   1   22.30   11.70
  -6  19   1   17.80   15.70
   6  19  -1   28.20   16.70
   6  19  -1    6.90   11.40
   5 -19  -1  100.99   18.90
   5 -19  -1  116.49   22.00
  -5 -19   1  103.59   20.90
  -5 -19   1   94.79   10.60
  -5 -19   1   69.89    9.00
   5  19  -1  102.19   20.60
  -5  19   1   89.49   21.10
  -5  19   1   87.79   22.70
   5  19  -1   99.99   28.80
   4 -19  -1    9.30    9.50
  -4 -19   1   29.90   11.60
   4 -19  -1   49.80   13.80
  -4 -19   1    4.50    6.70
  -4  19   1   -2.40   10.00
  -4  19   1   13.70   12.90
   4  19  -1   23.20   16.20
   4  19  -1   -3.30    6.10
   3 -19  -1   32.70   10.20
  -3 -19   1   42.30   14.40
  -3 -19   1   52.19   16.20
   3 -19  -1   54.89   14.70
  -3  19   1   40.90   15.90
   3  19  -1   51.49   14.60
  -3  19   1   49.00   13.70
   3  19  -1   49.30   22.30
  -2 -19   1  624.04   27.20
  -2 -19   1  643.94   28.70
  -2 -19   1  628.54   27.20
   2 -19  -1  669.43   37.30
  -2 -19   1  658.53   46.30
   2 -19  -1  668.53   39.50
  -2  19   1  731.73   41.10
   2  19  -1  752.02   49.50
  -2  19   1  682.93   50.19
   2  19  -1  692.03   58.19
  -1 -19   1  313.87   18.50
  -1 -19   1  298.17   18.40
   1 -19  -1  311.87   23.40
  -1 -19   1  309.67   31.30
  -1 -19   1  334.97   19.70
   1 -19  -1  327.97   22.70
  -1 -19   1  313.67   19.40
   1  19  -1  323.47   32.90
  -1  19   1  339.87   47.30
   1  19  -1  335.87   48.50
  -1  19   1  311.87   23.80
  -1  19   1  333.67   25.10
  -1  19   1  296.67   36.40
   0 -19   1 1309.27   54.69
   0 -19  -1 1348.17   58.59
   0 -19  -1 1252.37   55.49
   0 -19  -1 1338.47   57.49
   0 -19   1 1281.17   56.09
   0 -19   1 1389.16   57.59
   0 -19   1 1292.07   71.19
   0  19  -1 1322.07   54.69
   0  19   1 1445.66   75.29
   0  19   1 1374.26   84.99
   0  19   1 1350.26   59.69
   0  19  -1 1311.27   81.09
   0  19   1 1317.87   55.79
   0  19  -1 1287.77   73.09
   0  19  -1 1356.96   56.39
  -1 -19  -1   23.80    7.30
   1 -19   1   23.50    7.90
  -1 -19  -1   49.00    9.00
   1 -19   1   35.50   14.20
  -1 -19  -1   51.69   15.60
   1 -19   1   34.50    9.10
  -1 -19  -1   45.60    8.80
  -1  19  -1   49.10   11.00
  -1  19  -1   38.50   10.20
   1  19   1   42.60    9.30
   1  19   1   69.19   18.10
   1  19   1   38.20    6.80
   1  19   1   15.40   14.10
  -1  19  -1   41.00   14.50
  -1  19  -1   57.09   21.00
  -2 -19  -1  643.24   44.60
  -2 -19  -1  595.04   31.10
  -2 -19  -1  653.43   29.10
  -2 -19  -1  609.44   29.80
   2 -19   1  616.64   37.30
   2 -19   1  638.94   35.20
   2  19   1  634.44   57.39
  -2  19  -1  528.55   42.20
   2  19   1  661.63   45.90
  -2  19  -1  626.34   37.60
  -2  19  -1  649.34   48.40
   3 -19   1  243.68   27.80
  -3 -19  -1  233.68   15.10
  -3 -19  -1  227.28   14.30
  -3 -19  -1  269.17   32.30
   3 -19   1  221.98   21.30
   3  19   1  139.69   24.00
   3  19   1  311.57   46.70
  -3  19  -1  246.68   35.90
  -3  19  -1  250.67   25.40
   4 -19   1   20.30   10.00
  -4 -19  -1    0.50    8.30
  -4 -19  -1   14.40    5.30
  -4 -19  -1   10.00    8.60
  -4 -19  -1   15.90    5.60
   4 -19   1   11.30    9.50
  -4  19  -1    4.40   12.90
   4  19   1   20.50   14.40
  -4  19  -1    3.80    8.30
   4  19   1    2.10    7.60
   5 -19   1   28.30   13.30
   5 -19   1   -8.60    6.20
  -5 -19  -1    8.40    5.10
  -5 -19  -1    1.70    7.70
  -5 -19  -1   16.50    4.30
  -5 -19  -1   10.90    5.80
   5  19   1   -8.30    8.90
  -5  19  -1   14.50   12.90
   5  19   1   27.00   18.80
  -5  19  -1    8.90   10.60
   6 -19   1   91.49   18.80
   6 -19   1   88.79   22.70
  -6 -19  -1   80.79   12.70
  -6 -19  -1   79.19   18.00
  -6  19  -1   52.19   18.90
  -6  19  -1   64.09   21.20
   6  19   1   33.90   19.30
  -7 -19  -1  139.19   19.10
   7 -19   1  122.69   22.90
   7 -19   1  138.29   28.10
  -7  19  -1  131.09   30.20
  -7  19  -1  197.68   34.50
   7  19   1  100.49   29.00
   8 -19   1   13.40   13.70
   8 -19   1   30.70   16.80
  -8 -19  -1    9.20    8.60
  -8  19  -1   19.50   19.60
  -8  19  -1   22.90   16.60
   8  19   1    4.80   16.80
  -9 -19  -1   12.30   10.20
   9 -19   1   -4.00    9.10
   9 -19   1    7.30   15.70
  -9  19  -1    8.80   16.60
   9  19   1   11.10   16.50
   9  19   1    1.40    7.40
  -9  19  -1    6.10   15.60
 -10 -19  -1  116.89   23.10
 -10  19  -1  166.48   38.10
  10  19   1  103.39   17.40
  10  19   1  100.39   31.60
 -10  19  -1   75.19   25.70
 -11 -19  -1   12.60   12.80
 -11  19  -1    8.90   20.50
 -11  19  -1  -11.40   13.00
  11  19   1    1.60    9.10
  11  19   1    0.30   19.70
 -12 -19  -1   89.19   25.20
  12  19   1   55.99   31.80
  12  19   1   42.40   17.00
 -13 -19  -1    7.90   15.20
  13  19   1    4.60   21.50
  13  19   1   -4.70   12.80
 -14 -19  -1   13.70   16.30
  14  19   1    3.60   27.00
  14  19   1   -5.00   14.10
 -14 -20   1   65.69   24.70
  14  20  -1   19.40   29.40
  14  20  -1   53.39   18.20
 -13 -20   1   70.79   20.90
  13  20  -1   75.59   17.70
  13  20  -1   80.29   37.60
 -12 -20   1   -4.20   10.00
  12  20  -1    9.50   10.50
  12  20  -1   12.80   26.10
 -11 -20   1   81.29   19.40
  11  20  -1   72.49   30.50
 -11  20   1   60.59   31.50
 -11  20   1   69.89   27.80
 -10 -20   1  220.48   29.30
 -10  20   1  199.28   39.80
 -10  20   1  203.58   42.80
  10  20  -1  297.57   55.79
   9 -20  -1   -3.10   11.10
   9 -20  -1    4.10   13.90
  -9 -20   1   11.20   10.20
   9  20  -1   13.30   19.80
  -9  20   1  -12.10   16.80
  -9  20   1    3.50   13.20
   8 -20  -1    7.40   11.80
  -8 -20   1   -3.40    7.20
   8 -20  -1    1.00   12.80
  -8  20   1    5.30   15.50
   8  20  -1   -2.00   13.60
  -8  20   1    6.60   16.60
   7 -20  -1  116.79   26.80
   7 -20  -1  116.89   23.90
  -7 -20   1  100.89   15.10
   7  20  -1   96.29   30.40
  -7  20   1  131.39   28.90
  -7  20   1   96.29   25.90
   6 -20  -1  484.35   39.20
   6 -20  -1  472.05   42.20
  -6 -20   1  447.76   25.50
  -6 -20   1  487.85   38.20
  -6 -20   1  464.25   26.40
  -6 -20   1  501.65   23.30
  -6  20   1  435.86   42.50
  -6  20   1  412.86   42.30
   6  20  -1  485.15   51.09
   6  20  -1  464.15   38.70
  -5 -20   1  202.68   13.50
   5 -20  -1  194.88   26.50
   5 -20  -1  188.88   29.30
  -5 -20   1  202.88   12.50
  -5 -20   1  180.58   27.80
  -5  20   1  218.08   33.60
   5  20  -1  182.08   27.70
  -5  20   1  219.58   35.40
   5  20  -1  173.28   37.70
  -4 -20   1  308.17   31.10
  -4 -20   1  319.57   32.10
   4 -20  -1  293.87   29.30
   4 -20  -1  341.37   28.40
   4  20  -1  322.77   48.60
  -4  20   1  279.97   34.50
  -4  20   1  280.67   39.90
   3 -20  -1   64.49   14.30
  -3 -20   1   90.59   20.20
   3 -20  -1   71.89   15.70
  -3 -20   1  103.09   21.60
   3  20  -1   72.19   18.50
  -3  20   1  137.09   21.60
   3  20  -1   61.99   22.90
  -3  20   1  104.79   24.60
   2 -20  -1  250.97   22.70
  -2 -20   1  167.48   12.00
  -2 -20   1  197.18   12.40
   2 -20  -1  209.18   19.70
  -2 -20   1  224.08   32.60
  -2 -20   1  192.58   13.40
   2  20  -1  184.48   29.10
  -2  20   1  176.48   23.00
   2  20  -1  160.78   35.00
  -2  20   1  214.78   33.00
   1 -20  -1  800.82   43.10
  -1 -20   1  779.72   53.39
   1 -20  -1  764.02   41.20
  -1 -20   1  867.21   37.10
  -1 -20   1  873.71   38.50
  -1 -20   1  794.12   36.50
  -1  20   1  834.22   64.39
  -1  20   1  835.32   44.40
  -1  20   1  836.32   56.29
   1  20  -1  868.91   66.09
  -1  20   1  849.22   43.10
   1  20  -1  832.22   56.19
   0 -20   1  904.71   41.90
   0 -20   1  860.81   55.69
   0 -20  -1  870.61   42.80
   0 -20   1  876.71   42.50
   0 -20  -1  856.51   45.20
   0 -20  -1  851.01   41.40
   0 -20   1  864.61   40.50
   0  20   1  840.12   56.29
   0  20  -1  853.41   39.60
   0  20  -1  914.11   42.10
   0  20  -1  964.20   66.89
   0  20   1  904.21   67.59
   0  20  -1  840.22   57.39
   0  20   1  980.80   46.70
   0  20   1  876.71   41.00
  -1 -20  -1  535.05   28.80
   1 -20   1  575.24   33.50
   1 -20   1  556.54   31.40
  -1 -20  -1  558.84   42.20
  -1 -20  -1  557.14   29.30
  -1 -20  -1  573.24   31.60
   1  20   1  572.44   25.60
   1  20   1  614.44   56.09
  -1  20  -1  540.45   32.30
  -1  20  -1  530.75   33.10
   1  20   1  590.14   45.20
   1  20   1  556.14   28.10
  -1  20  -1  570.74   46.20
  -1  20  -1  513.05   48.20
   2 -20   1  202.98   18.70
  -2 -20  -1  164.38   14.10
  -2 -20  -1  173.08   12.50
   2 -20   1  153.38   20.80
  -2 -20  -1  167.08   17.50
  -2 -20  -1  176.88   26.50
  -2 -20  -1  149.79   12.90
  -2  20  -1  209.18   20.70
   2  20   1  149.88   33.20
   2  20   1  205.58   30.60
  -2  20  -1  172.28   28.60
  -3 -20  -1  224.78   17.20
  -3 -20  -1  239.58   13.90
  -3 -20  -1  246.08   15.90
  -3 -20  -1  297.37   35.70
   3 -20   1  276.67   26.00
   3 -20   1  283.87   23.90
   3  20   1  300.37   48.90
  -3  20  -1  268.67   35.60
   3  20   1  277.27   35.10
  -3  20  -1  258.77   26.00
   4 -20   1  195.58   25.00
   4 -20   1  176.68   26.50
  -4 -20  -1  169.18   13.80
  -4 -20  -1  184.78   27.40
  -4 -20  -1  209.18   30.70
  -4 -20  -1  167.18   10.80
  -4 -20  -1  183.68   14.10
   4  20   1  248.38   45.10
  -4  20  -1  203.88   28.60
   4  20   1  157.18   25.20
  -4  20  -1  188.58   32.00
  -5 -20  -1  117.39   14.00
  -5 -20  -1  118.69   22.20
   5 -20   1  146.89   26.90
  -5 -20  -1  118.09   14.20
   5 -20   1   99.99   18.90
  -5 -20  -1  160.18   11.70
  -5  20  -1  128.09   25.00
   5  20   1  145.09   36.00
   5  20   1  112.39   22.40
  -5  20  -1  132.09   28.50
   6 -20   1  749.13   53.19
  -6 -20  -1  726.53   37.30
   6 -20   1  759.12   48.80
  -6 -20  -1  707.93   48.90
  -6  20  -1  747.43   58.19
   6  20   1  659.53   62.49
  -6  20  -1  716.73   54.19
   7 -20   1  158.78   30.40
   7 -20   1  171.48   29.00
  -7 -20  -1  143.29   19.40
  -7  20  -1  104.89   28.10
   7  20   1  127.59   33.80
  -7  20  -1  167.28   33.90
   8 -20   1  312.67   39.10
  -8 -20  -1  259.07   25.20
   8 -20   1  238.58   37.80
  -8  20  -1  274.27   43.70
  -8  20  -1  327.57   46.10
   8  20   1  303.47   54.29
  -9 -20  -1  159.78   23.90
   9 -20   1  135.69   27.70
   9 -20   1  136.79   32.50
  -9  20  -1  113.59   30.40
   9  20   1  139.69   41.00
  -9  20  -1  186.88   35.90
 -10 -20  -1   88.79   21.50
 -10  20  -1  105.19   29.40
 -10  20  -1  120.39   36.70
  10  20   1   95.59   14.70
  10  20   1  113.29   39.90
 -11 -20  -1   93.89   21.70
 -11  20  -1   61.09   28.90
  11  20   1  115.79   36.40
  11  20   1  131.49   19.70
 -11  20  -1  117.79   33.10
 -12 -20  -1   -3.60   14.00
  12  20   1    9.70   12.70
  12  20   1    8.40   21.70
 -13 -20  -1   46.20   19.70
  13  20   1   35.10   31.80
  13  20   1   33.70   16.10
 -14 -20  -1   26.60   20.60
  14  20   1    7.90   29.30
  14  20   1   18.60   15.20
 -14 -21   1  211.88   39.30
  14  21  -1  216.28   25.50
  14  21  -1  176.68   53.79
 -13 -21   1   83.39   23.40
  13  21  -1   91.19   38.30
 -12 -21   1  241.98   34.70
  12  21  -1  182.98   47.10
 -11 -21   1  531.85   41.70
 -11  21   1  460.05   63.79
  11  21  -1  442.86   69.69
 -11  21   1  516.05   67.39
 -10 -21   1   65.69   17.70
 -10  21   1   56.99   24.10
 -10  21   1  121.99   38.50
  10  21  -1   25.00   24.30
   9 -21  -1  518.15   52.39
   9 -21  -1  519.25   48.60
  -9 -21   1  574.34   38.10
   9  21  -1  547.85   76.89
  -9  21   1  641.04   61.49
  -9  21   1  631.04   56.79
   8 -21  -1  224.28   34.40
   8 -21  -1  176.38   35.20
  -8 -21   1  227.48   24.90
   8  21  -1  148.99   40.50
  -8  21   1  208.68   39.60
  -8  21   1  130.19   33.60
   7 -21  -1   47.60   19.40
   7 -21  -1   70.09   20.40
  -7 -21   1   71.59   12.80
  -7  21   1   62.69   21.30
  -7  21   1  102.49   30.30
   7  21  -1   52.89   24.80
   6 -21  -1   -5.80   10.40
   6 -21  -1   10.40   11.30
  -6 -21   1   12.90    6.20
  -6 -21   1    8.90   10.10
  -6 -21   1   14.70    4.60
  -6  21   1  -13.20    8.60
   6  21  -1   11.30   12.60
   6  21  -1   -0.20   14.30
  -6  21   1    1.90   11.20
   5 -21  -1    5.40   10.60
   5 -21  -1   -1.90    8.60
  -5 -21   1    4.10   10.10
   5  21  -1    5.40   12.90
  -5  21   1    1.00   10.90
   5  21  -1   -4.70    8.30
  -5  21   1    4.30   12.90
  -4 -21   1   41.10   16.10
   4 -21  -1   71.69   15.90
   4 -21  -1   57.79   16.70
  -4 -21   1   50.59   15.20
  -4  21   1   77.39   19.40
   4  21  -1   85.19   28.10
  -4  21   1   45.40   20.60
  -3 -21   1  247.58   33.50
   3 -21  -1  183.58   26.40
   3 -21  -1  144.19   21.00
  -3 -21   1  153.98   26.80
   3  21  -1  219.28   41.60
  -3  21   1  215.18   35.10
   3  21  -1  169.68   28.60
  -3  21   1  144.19   23.40
   2 -21  -1  100.59   17.60
  -2 -21   1  106.69   11.10
  -2 -21   1  116.79   10.20
  -2 -21   1  115.29   12.60
  -2 -21   1  101.19   22.60
   2 -21  -1  109.39   16.90
   2  21  -1  106.39   28.70
  -2  21   1  119.39   18.90
  -2  21   1  124.39   26.90
   2  21  -1   80.69   20.90
  -1 -21   1 1360.56   56.09
   1 -21  -1 1338.37   62.29
  -1 -21   1 1323.27   54.29
  -1 -21   1 1371.46   55.19
   1 -21  -1 1243.28   59.39
  -1 -21   1 1475.35   77.99
  -1  21   1 1292.77   85.39
  -1  21   1 1337.07   77.29
   1  21  -1 1402.16   77.99
  -1  21   1 1337.17   61.19
  -1  21   1 1317.77   63.39
   1  21  -1 1390.96   88.49
   0 -21   1   96.59   13.50
   0 -21  -1   76.89   12.70
   0 -21  -1   80.89   12.60
   0 -21   1   62.89   17.40
   0 -21   1   86.49   12.60
   0  21   1   80.19   12.00
   0  21   1   91.59   15.40
   0  21  -1  102.29   26.10
   0  21   1  100.39   22.50
   0  21  -1   64.49   19.50
   0  21  -1  117.09   11.90
   0  21  -1   86.49   13.40
   0  21   1   70.39   23.20
  -1 -21  -1 1152.18   50.69
  -1 -21  -1 1067.79   63.99
   1 -21   1 1126.29   51.09
   1 -21   1 1074.59   52.89
  -1 -21  -1 1045.80   47.60
  -1 -21  -1 1127.39   48.70
   1  21   1 1140.79   67.99
  -1  21  -1 1021.10   50.89
  -1  21  -1 1060.09   73.49
   1  21   1 1104.69   43.20
  -1  21  -1 1120.99   69.49
  -1  21  -1 1160.48   53.69
   1  21   1 1043.50   45.40
   1  21   1 1153.78   81.19
  -2 -21  -1  339.57   33.00
  -2 -21  -1  311.07   22.10
   2 -21   1  307.77   25.80
  -2 -21  -1  297.67   18.40
   2 -21   1  313.37   24.30
  -2 -21  -1  304.37   18.90
  -2 -21  -1  303.07   19.90
   2  21   1  289.77   37.40
  -2  21  -1  329.77   42.40
   2  21   1  343.37   52.39
  -2  21  -1  293.87   25.60
  -3 -21  -1   14.90    8.80
  -3 -21  -1   16.10    6.30
   3 -21   1   20.90   10.80
  -3 -21  -1   12.80    4.10
   3 -21   1   11.40    7.50
  -3 -21  -1   20.80    8.20
  -3 -21  -1   20.10    5.80
   3  21   1   11.80   14.90
  -3  21  -1   33.00   15.40
  -3  21  -1   28.20   10.30
   3  21   1   22.90   12.40
   4 -21   1  692.53   47.50
  -4 -21  -1  723.63   30.10
  -4 -21  -1  790.52   53.29
  -4 -21  -1  722.73   33.30
  -4 -21  -1  706.73   48.80
   4 -21   1  792.72   45.60
  -4 -21  -1  736.73   34.20
   4  21   1  706.23   63.49
   4  21   1  591.44   46.30
  -4  21  -1  712.63   56.69
  -4  21  -1  710.13   47.70
   5 -21   1  201.08   30.20
  -5 -21  -1  156.48   26.80
  -5 -21  -1  177.08   27.80
   5 -21   1  179.08   25.80
  -5 -21  -1  150.48   14.20
  -5 -21  -1  156.38   15.60
  -5 -21  -1  164.18   12.60
  -5  21  -1  216.18   34.50
   5  21   1  186.18   28.70
  -5  21  -1  192.58   30.80
   5  21   1  223.48   42.60
  -6 -21  -1  628.04   35.20
   6 -21   1  601.84   44.50
   6 -21   1  648.04   50.49
   6  21   1  697.13   64.09
  -6  21  -1  666.13   51.29
  -6  21  -1  703.63   56.09
   7 -21   1  178.68   27.90
  -7 -21  -1  193.38   22.30
   7 -21   1  226.78   36.10
   7  21   1  227.58   46.40
  -7  21  -1  210.18   39.60
  -7  21  -1  192.98   37.20
   8 -21   1  133.69   27.50
  -8 -21  -1   87.79   16.50
   8 -21   1   68.69   21.50
  -8  21  -1   99.99   31.10
   8  21   1   66.19   30.00
  -8  21  -1   72.19   23.40
  -9 -21  -1    0.20    9.40
   9 -21   1  -18.80   13.60
   9 -21   1    1.20   13.10
  -9  21  -1   31.80   20.30
   9  21   1    5.30   18.20
  -9  21  -1   14.30   19.00
 -10 -21  -1   18.70   13.00
 -10  21  -1  -13.40   15.00
  10  21   1    3.70   20.70
 -10  21  -1   13.90   18.20
 -11 -21  -1    6.20    9.80
  11  21   1   -3.80   21.70
 -11  21  -1  -18.50   25.70
 -11  21  -1  -30.90   17.90
 -12 -21  -1  -12.30   11.60
  12  21   1   -4.80   20.90
  12  21   1    2.20   10.20
 -13 -21  -1   26.60   16.60
  13  21   1   23.30   27.80
  13  21   1  -11.90   11.10
 -14 -21  -1   19.60   19.20
  14  21   1   -4.90   14.30
  14  21   1   22.80   28.60
 -13 -22   1   28.00   16.60
  13  22  -1   16.00   26.60
 -12 -22   1  156.48   29.50
  12  22  -1   97.49   40.80
 -11 -22   1   70.59   19.60
 -11  22   1   69.29   28.10
  11  22  -1    5.10   24.10
 -11  22   1   34.50   30.70
 -10 -22   1  309.57   34.40
 -10  22   1  317.77   48.80
 -10  22   1  302.97   50.49
  10  22  -1  227.48   50.99
   9 -22  -1   21.40   16.80
   9 -22  -1  -15.80   13.10
  -9 -22   1   32.60   12.50
  -9  22   1   25.30   23.30
   9  22  -1   12.60   21.10
  -9  22   1   -8.10   16.70
   8 -22  -1  287.47   43.90
   8 -22  -1  312.27   41.50
  -8 -22   1  258.97   23.40
  -8  22   1  292.87   48.70
   8  22  -1  210.88   47.50
  -8  22   1  274.07   43.50
   7 -22  -1    9.20   12.90
   7 -22  -1   29.30   14.70
  -7 -22   1   27.20    7.70
  -7  22   1   25.00   21.90
   7  22  -1   -2.70   17.10
  -7  22   1    1.50   12.50
  -6 -22   1  452.15   39.20
   6 -22  -1  399.16   39.40
  -6 -22   1  378.06   23.30
   6 -22  -1  439.46   37.90
   6  22  -1  433.66   61.49
  -6  22   1  325.97   47.10
  -6  22   1  441.46   40.80
   5 -22  -1   62.29   18.90
  -5 -22   1   36.40    7.20
   5 -22  -1   28.70   13.30
  -5 -22   1   40.60   15.90
  -5  22   1   52.29   17.70
   5  22  -1   25.70   15.20
  -5  22   1    9.10   13.80
   5  22  -1   33.40   20.00
  -4 -22   1  475.85   40.60
  -4 -22   1  405.66   36.80
   4 -22  -1  431.16   33.60
   4 -22  -1  382.86   35.00
   4  22  -1  451.15   59.89
  -4  22   1  370.56   34.40
  -4  22   1  400.56   49.50
   3 -22  -1   74.59   17.00
  -3 -22   1   87.29   21.50
   3 -22  -1   98.49   17.50
  -3 -22   1   99.49   11.60
  -3 -22   1   93.79    8.30
  -3 -22   1   71.79   20.70
  -3  22   1   93.89   25.30
   3  22  -1   74.89   20.10
   3  22  -1   71.49   26.20
  -3  22   1   89.09   18.30
  -2 -22   1  891.81   59.89
  -2 -22   1  899.71   40.20
   2 -22  -1  960.20   51.19
  -2 -22   1  866.81   38.20
  -2 -22   1  891.91   38.10
   2 -22  -1  924.91   48.10
  -2  22   1  825.62   48.40
  -2  22   1  960.40   64.49
   2  22  -1  938.11   72.69
   2  22  -1  933.91   61.69
   1 -22  -1   47.80   10.80
  -1 -22   1   57.19    9.30
   1 -22  -1   52.09   11.80
  -1 -22   1   47.40    9.70
  -1 -22   1   66.49   17.90
  -1  22   1   54.99   11.60
  -1  22   1   40.90   16.50
  -1  22   1   32.30   18.70
   1  22  -1   61.19   23.20
   1  22  -1   59.99   17.60
   0 -22   1  276.67   20.00
   0 -22   1  232.08   19.30
   0 -22  -1  228.38   19.40
   0 -22  -1  238.08   20.20
   0 -22   1  269.57   36.40
   0  22   1  302.07   24.60
   0  22   1  243.18   18.90
   0  22  -1  277.47   20.60
   0  22   1  275.27   45.70
   0  22   1  264.17   38.20
   0  22  -1  271.37   18.60
   0  22  -1  391.26   52.59
   0  22  -1  223.78   35.00
  -1 -22  -1   64.99   10.50
  -1 -22  -1   70.19   17.90
  -1 -22  -1   48.70   10.10
   1 -22   1   53.29   10.50
   1 -22   1   44.80   10.90
   1  22   1   94.99    8.40
  -1  22  -1   40.90   11.50
   1  22   1   87.39   27.80
  -1  22  -1   88.59   14.50
  -1  22  -1   65.69   18.70
   1  22   1   72.49   19.40
  -1  22  -1   76.39   24.00
  -2 -22  -1   37.90   13.40
  -2 -22  -1   21.50    7.00
   2 -22   1   14.00    8.30
  -2 -22  -1   16.80    5.70
  -2 -22  -1   24.00    6.60
   2 -22   1   13.70    7.20
   2  22   1   38.30   14.70
  -2  22  -1   34.80   10.60
  -2  22  -1   34.90   15.20
   2  22   1   36.80   19.60
  -3 -22  -1  151.68   13.60
  -3 -22  -1  160.38   18.00
  -3 -22  -1  180.28   29.40
  -3 -22  -1  204.68   14.60
   3 -22   1  127.79   21.60
   3 -22   1  117.99   19.70
  -3 -22  -1  137.79   11.30
   3  22   1  228.18   43.70
   3  22   1  137.39   26.00
  -3  22  -1  170.98   31.40
  -3  22  -1  112.49   21.70
  -4 -22  -1   52.59    7.60
   4 -22   1   27.40   13.70
  -4 -22  -1   45.40    9.50
  -4 -22  -1   51.79    9.60
  -4 -22  -1   59.19   16.70
  -4 -22  -1   22.30   16.10
   4 -22   1   54.19   14.60
   4  22   1   20.20   11.50
   4  22   1   40.00   22.40
  -4  22  -1   86.69   20.20
  -4  22  -1   35.80   16.90
  -5 -22  -1  186.38   30.90
  -5 -22  -1  114.79   25.30
   5 -22   1  183.38   30.60
  -5 -22  -1  160.18   17.30
   5 -22   1  142.09   24.80
   5  22   1  164.08   28.40
  -5  22  -1  176.68   33.70
  -5  22  -1  181.98   30.10
   5  22   1  178.48   40.40
  -6 -22  -1   14.40    7.30
   6 -22   1    6.20   11.20
   6 -22   1   15.80   10.80
  -6  22  -1    8.50   13.40
   6  22   1    1.50   16.60
  -6  22  -1   12.80   13.50
  -7 -22  -1  136.89   18.80
   7 -22   1  103.19   23.40
   7 -22   1  123.59   26.70
   7  22   1  116.59   34.90
  -7  22  -1  187.68   36.70
  -7  22  -1  171.38   33.70
   8 -22   1  356.56   41.90
   8 -22   1  337.97   46.10
  -8 -22  -1  350.06   28.50
  -8  22  -1  349.07   50.79
   8  22   1  251.77   50.89
  -8  22  -1  294.57   44.60
  -9 -22  -1   33.90   13.90
   9 -22   1   21.40   16.00
   9 -22   1   15.80   20.80
  -9  22  -1   26.30   20.10
   9  22   1   37.10   25.30
  -9  22  -1   30.70   20.40
 -10 -22  -1   68.99   20.80
  10  22   1   39.20   29.40
 -10  22  -1   97.39   31.10
 -10  22  -1   67.19   29.90
 -11 -22  -1   27.20   14.30
  11  22   1   -2.60   19.40
 -11  22  -1    3.10   26.50
 -11  22  -1  -32.30   20.60
 -12 -22  -1  -17.30    9.70
  12  22   1   11.30   27.40
 -13 -22  -1    8.60   18.10
  13  22   1   25.70   31.60
 -13 -23   1   11.90   13.70
  13  23  -1   -6.20   27.50
 -12 -23   1   32.10   16.40
  12  23  -1   -4.90   24.00
 -11 -23   1   17.00   14.20
 -11  23   1   45.50   28.10
  11  23  -1    3.20   22.40
 -11  23   1   -1.30   26.30
 -10 -23   1   40.00   15.50
 -10  23   1   41.30   24.30
  10  23  -1   32.30   26.70
 -10  23   1   59.69   26.60
   9 -23  -1   25.30   18.80
  -9 -23   1   18.90   10.90
   9 -23  -1   11.50   16.90
  -9  23   1   26.90   23.30
   9  23  -1    5.80   17.50
  -9  23   1   25.70   23.80
  -8 -23   1  296.17   25.10
   8 -23  -1  337.47   46.10
   8 -23  -1  300.37   42.30
  -8  23   1  346.27   54.59
   8  23  -1  387.96   65.69
  -8  23   1  365.66   49.70
   7 -23  -1   20.30   13.90
   7 -23  -1   11.30   12.80
  -7 -23   1   13.70    5.80
   7  23  -1   12.80   16.80
  -7  23   1   10.20   16.00
  -7  23   1   -0.30   12.20
   6 -23  -1   16.40   12.30
  -6 -23   1    8.10    5.90
  -6 -23   1   23.40   14.30
   6 -23  -1   -8.30    9.00
   6  23  -1   14.60   19.50
  -6  23   1   -3.20   11.80
  -6  23   1    9.40   13.10
  -5 -23   1    3.80   11.40
   5 -23  -1   20.20   13.20
   5 -23  -1   12.60   12.00
  -5  23   1   12.70   16.50
   5  23  -1   -4.50   14.20
  -5  23   1   19.50   12.60
   5  23  -1   21.70   15.30
   4 -23  -1    3.40    7.80
  -4 -23   1   14.60    9.00
  -4 -23   1   16.70   13.30
   4 -23  -1   12.10   11.20
  -4  23   1    2.90   11.70
   4  23  -1   30.40   22.50
  -4  23   1    7.80   14.40
   4  23  -1    3.50   10.80
   3 -23  -1    1.60    8.70
  -3 -23   1   28.40   14.90
  -3 -23   1   20.40    7.20
  -3 -23   1   22.30    5.60
  -3 -23   1   21.80    5.40
   3 -23  -1   11.70    9.60
  -3 -23   1   19.20   12.40
  -3  23   1   16.70   10.30
   3  23  -1    6.50   10.90
  -3  23   1   12.40   16.30
   3  23  -1    0.80   16.70
  -2 -23   1    8.70    5.20
   2 -23  -1   22.50    8.80
  -2 -23   1   -7.70    8.90
   2 -23  -1   15.90    8.70
  -2 -23   1   19.60    5.90
   2  23  -1   41.00   23.20
  -2  23   1   24.20   15.30
  -2  23   1   31.00   10.30
   2  23  -1   14.60   13.40
  -1 -23   1   49.10    9.10
  -1 -23   1   32.10    8.60
   1 -23  -1   32.20   10.40
   1 -23  -1   48.20   11.40
  -1 -23   1   39.20   15.40
   1  23  -1   28.80   14.90
   1  23  -1   79.29   27.10
  -1  23   1   13.00   13.40
  -1  23   1   22.90   18.50
  -1  23   1   37.20   10.40
   0 -23   1   13.80   10.40
   0 -23  -1   25.50    7.90
   0 -23   1   19.50    6.90
   0 -23  -1    5.20    5.70
   0 -23   1   10.70    6.90
   0 -23  -1   -0.10   10.50
   0  23  -1   24.40    8.80
   0  23   1   24.80   18.50
   0  23   1   10.40    7.90
   0  23   1    7.10    5.80
   0  23  -1    6.80    5.60
   0  23  -1   11.80   15.60
   0  23   1    1.20   10.40
   0  23  -1    6.40   10.40
  -1 -23  -1  144.89   17.30
  -1 -23  -1  173.98   18.90
   1 -23   1  158.08   20.30
   1 -23   1  158.38   21.50
  -1 -23  -1  204.08   32.50
   1  23   1  213.68   34.50
  -1  23  -1  176.58   18.00
  -1  23  -1  184.58   32.70
   1  23   1  182.78   40.00
  -2 -23  -1   20.30    6.70
   2 -23   1   29.70    9.80
  -2 -23  -1   21.10    6.70
  -2 -23  -1   39.60   14.20
   2 -23   1   23.70   10.60
  -2  23  -1   26.40   15.90
   2  23   1   22.50   14.70
   2  23   1   23.60   21.60
  -2  23  -1   25.80   10.90
  -3 -23  -1  481.05   25.10
  -3 -23  -1  354.66   27.20
   3 -23   1  476.75   32.90
   3 -23   1  421.96   34.80
  -3 -23  -1  457.75   40.30
  -3 -23  -1  405.96   23.80
   3  23   1  427.86   62.79
   3  23   1  444.46   43.00
  -3  23  -1  406.26   34.20
  -3  23  -1  454.05   45.70
  -4 -23  -1  352.26   35.00
  -4 -23  -1  348.77   22.10
  -4 -23  -1  303.07   34.70
  -4 -23  -1  375.16   45.00
   4 -23   1  374.56   31.50
   4 -23   1  329.87   32.80
  -4  23  -1  344.27   34.70
  -4  23  -1  374.56   47.30
   4  23   1  355.46   56.59
   5 -23   1  141.49   26.90
   5 -23   1  207.58   28.80
  -5 -23  -1  179.28   17.30
  -5 -23  -1  198.38   33.50
   5  23   1  180.48   40.40
   5  23   1  214.18   32.60
  -5  23  -1  259.97   40.70
  -5  23  -1  174.48   29.70
   6 -23   1    5.70   10.00
   6 -23   1   20.80   13.90
  -6 -23  -1   -6.40    5.20
  -6  23  -1    9.40   13.90
   6  23   1   14.50   17.00
  -6  23  -1    9.40   13.70
   7 -23   1   29.30   15.10
  -7 -23  -1   14.40    7.70
   7 -23   1   15.80   12.00
  -7  23  -1   32.50   18.70
  -7  23  -1   24.00   19.20
   7  23   1    0.10   15.80
  -8 -23  -1   77.69   17.10
   8 -23   1   48.30   18.10
   8 -23   1  134.09   30.70
   8  23   1   76.39   33.70
  -8  23  -1   86.69   29.10
  -8  23  -1   45.10   22.20
   9 -23   1   80.59   24.50
  -9 -23  -1   65.09   17.20
   9 -23   1   38.10   24.10
  -9  23  -1   69.39   26.60
   9  23   1  120.09   39.60
  -9  23  -1   26.50   20.40
 -10 -23  -1   61.19   18.50
  10 -23   1   51.19   33.70
 -10  23  -1   44.70   27.70
  10  23   1   70.19   30.10
 -10  23  -1   33.20   22.60
 -11 -23  -1   -5.40   12.30
  11  23   1   -0.80   21.30
 -11  23  -1   21.80   27.70
 -11  23  -1    2.80   26.50
 -12 -23  -1   -0.50   12.60
  12  23   1    1.50   23.60
 -13 -23  -1   94.39   26.40
  13  23   1    8.40   30.10
 -13 -24   1  241.28   37.40
  13  24  -1  170.78   51.09
 -12 -24   1   -5.60   12.70
  12  24  -1   11.50   25.30
 -12  24   1  -11.80   29.00
 -11 -24   1   25.60   14.00
 -11  24   1   12.00   29.40
  11  24  -1    3.10   24.40
 -11  24   1   -4.00   24.20
 -10 -24   1   14.40   12.90
 -10  24   1    8.90   23.50
  10  24  -1   -5.70   22.70
 -10  24   1   22.40   22.10
   9 -24  -1  141.89   33.20
  -9 -24   1  187.28   24.10
   9 -24  -1  127.79   28.30
  -9  24   1   97.09   30.40
  -9  24   1  166.88   40.60
   9  24  -1  147.09   43.80
  -8 -24   1   59.09   12.60
   8 -24  -1   89.79   26.20
   8 -24  -1   91.09   24.10
   8  24  -1   67.89   30.40
  -8  24   1   46.70   28.70
  -8  24   1   71.09   26.70
   7 -24  -1  121.99   24.80
   7 -24  -1   97.69   24.10
  -7 -24   1  148.59   17.50
   7  24  -1  110.39   36.60
  -7  24   1  133.99   32.60
  -7  24   1  104.59   30.60
  -6 -24   1  511.05   28.00
   6 -24  -1  516.15   46.50
   6 -24  -1  573.64   44.70
  -6  24   1  533.95   52.89
   6  24  -1  602.64   61.59
  -6  24   1  497.75   46.40
  -5 -24   1   15.50   13.20
   5 -24  -1   24.80   14.60
  -5 -24   1    0.20    5.20
   5 -24  -1    5.60   11.10
  -5 -24   1    0.90    4.80
   5  24  -1   13.60   13.10
   5  24  -1    2.80   15.70
  -5  24   1   -4.50   17.90
  -5  24   1   21.50   13.70
   4 -24  -1  963.30   59.69
  -4 -24   1  931.01   38.40
  -4 -24   1 1026.00   67.79
   4 -24  -1  947.01   55.29
  -4 -24   1  889.31   61.59
  -4  24   1  944.41   69.89
  -4  24   1  995.60   60.39
   4  24  -1  970.20   65.59
   4  24  -1  992.30   80.09
  -3 -24   1    3.10    4.70
  -3 -24   1    6.60   11.20
  -3 -24   1    2.90    4.10
   3 -24  -1   -4.80    7.50
  -3 -24   1   11.40   12.30
   3 -24  -1    0.20    9.00
  -3 -24   1    1.40    4.50
   3  24  -1  -27.00   14.40
  -3  24   1    2.40   13.70
  -3  24   1    2.90    7.20
   3  24  -1    1.20   12.30
   2 -24  -1   46.10   14.20
  -2 -24   1   44.30    8.90
  -2 -24   1   78.49   10.60
  -2 -24   1   46.50   20.10
   2 -24  -1   82.09   16.60
  -2  24   1   31.60   17.20
  -2  24   1   68.49   16.30
   2  24  -1   92.89   30.70
   2  24  -1   83.69   22.80
  -1 -24   1    7.50    6.50
   1 -24  -1    9.40    8.00
  -1 -24   1    8.40   10.10
   1 -24  -1   10.60    8.30
  -1 -24   1   11.10    6.60
  -1  24   1    2.60   14.20
  -1  24   1   12.60   13.60
   1  24  -1   29.60   14.50
   1  24  -1   -6.80   14.50
  -1  24   1    2.90    6.30
   0 -24  -1   -0.80    7.70
   0 -24   1   28.40    9.60
   0 -24  -1   43.30   17.20
   0 -24  -1   30.00    9.10
   0 -24   1   33.50   16.30
   0 -24   1   15.70    7.20
   0  24  -1   40.60    8.30
   0  24   1   13.30    7.00
   0  24   1   37.40   18.00
   0  24  -1   18.20   16.90
   0  24  -1   32.60   17.30
   0  24  -1   24.70    8.70
   0  24   1   29.30   10.70
   0  24   1   35.90   22.30
   1 -24   1  125.59   20.10
  -1 -24  -1  145.29   17.30
  -1 -24  -1  149.69   28.90
   1 -24   1  148.69   29.70
  -1 -24  -1  103.89   15.20
   1 -24   1   92.69   14.50
  -1  24  -1  138.59   29.40
  -1  24  -1  136.79   18.70
   1  24   1  111.89   32.10
   1  24   1   58.69   20.20
  -2 -24  -1  204.08   16.90
  -2 -24  -1  244.48   35.20
  -2 -24  -1  189.18   16.50
   2 -24   1  158.18   22.70
   2 -24   1  174.48   22.20
  -2  24  -1  206.38   34.90
  -2  24  -1  201.08   26.10
   2  24   1  155.48   37.70
   2  24   1  206.48   35.50
  -3 -24  -1  430.46   25.10
   3 -24   1  463.75   37.00
   3 -24   1  444.46   32.90
  -3 -24  -1  481.95   43.80
  -3 -24  -1  424.26   25.90
  -3  24  -1  458.65   36.40
   3  24   1  471.95   66.19
  -3  24  -1  543.75   50.79
   3  24   1  540.55   47.80
  -4 -24  -1  840.72   38.50
   4 -24   1  814.12   49.60
   4 -24   1  814.72   53.69
  -4 -24  -1  718.63   57.29
  -4 -24  -1  863.01   57.89
  -4 -24  -1  777.42   36.90
   4  24   1  815.62   73.49
  -4  24  -1  748.73   51.99
  -4  24  -1  804.02   63.39
   5 -24   1  482.75   38.60
   5 -24   1  393.16   38.70
  -5 -24  -1  417.36   25.60
  -5 -24  -1  368.26   38.70
  -5  24  -1  446.86   45.40
   5  24   1  443.96   66.99
   5  24   1  469.05   43.00
  -5  24  -1  417.16   39.90
  -6 -24  -1  196.08   18.70
   6 -24   1  223.58   31.20
   6 -24   1  223.88   36.20
  -6  24  -1  252.27   37.70
  -6  24  -1  278.47   43.10
   6  24   1  192.48   43.60
   7 -24   1   33.20   15.20
   7 -24   1   -4.60   11.40
  -7 -24  -1   65.49   13.50
   7  24   1   37.90   25.40
  -7  24  -1   10.90   17.40
  -7  24  -1   49.99   20.10
  -8 -24  -1   17.50   10.80
   8 -24   1   37.50   21.30
   8 -24   1   42.10   18.50
  -8  24  -1   48.20   26.90
  -8  24  -1   27.90   21.20
   8  24   1   71.39   26.50
  -9 -24  -1    5.20   11.00
   9 -24   1  -13.00   15.20
   9 -24   1   -2.30   13.20
  -9  24  -1   -2.60   18.50
   9  24   1   13.80   22.50
  -9  24  -1    7.60   21.00
 -10 -24  -1   21.40   13.90
  10 -24   1   40.10   24.00
 -10  24  -1   38.10   19.70
  10  24   1   -3.70   19.30
 -10  24  -1    7.60   17.60
 -11 -24  -1   15.40   14.10
  11  24   1    0.40   23.10
 -11  24  -1  -36.20   21.10
 -11  24  -1   -7.10   20.70
 -12 -24  -1  -15.60   13.60
  12  24   1  -11.60   23.20
 -12  24  -1  -13.10   23.30
 -13 -24  -1   -3.40   11.40
  13  24   1    0.70   25.80
  13  25  -1  -14.50   24.80
 -12 -25   1  102.09   25.90
  12  25  -1   40.80   31.20
 -12  25   1   28.00   29.00
 -12  25   1   34.70   32.80
 -11 -25   1   31.60   17.20
  11  25  -1    3.90   26.10
 -11  25   1   37.50   28.70
 -11  25   1   13.30   26.00
 -10 -25   1  -13.10    9.40
  10 -25  -1  -12.40   27.50
 -10  25   1   30.40   24.90
 -10  25   1   28.70   19.40
  10  25  -1    4.80   24.50
   9 -25  -1    7.50   16.00
   9 -25  -1   13.40   17.60
  -9 -25   1   12.70    9.40
   9  25  -1   -5.00   20.30
  -9  25   1   37.70   23.20
  -9  25   1   21.50   24.60
   8 -25  -1   10.20   12.60
   8 -25  -1   22.80   17.00
  -8 -25   1   10.20    7.90
  -8  25   1   -7.30   17.90
   8  25  -1   19.60   23.40
  -8  25   1   12.50   21.20
   7 -25  -1  120.99   27.10
   7 -25  -1  192.38   31.50
  -7 -25   1  149.39   17.40
   7  25  -1   80.79   32.80
  -7  25   1  175.28   35.00
  -7  25   1  173.38   37.80
   6 -25  -1   10.60   12.00
  -6 -25   1    5.60    5.10
   6 -25  -1   20.10   13.90
  -6  25   1    8.70   11.00
   6  25  -1  -11.00   15.80
  -6  25   1   22.40   17.70
   5 -25  -1  617.44   44.90
  -5 -25   1  636.04   28.30
   5 -25  -1  537.95   46.90
  -5 -25   1  587.24   50.29
   5  25  -1  617.24   64.99
  -5  25   1  591.84   48.20
   5  25  -1  425.36   44.90
  -5  25   1  568.24   58.39
  -4 -25   1    0.30    5.20
   4 -25  -1    9.20   11.20
  -4 -25   1    5.60    6.00
  -4 -25   1   16.10   12.20
   4 -25  -1    5.70    8.70
  -4 -25   1   21.40   17.10
  -4  25   1    8.00   12.00
  -4  25   1   23.00   16.80
   4  25  -1   28.00   15.20
   4  25  -1    4.20   18.30
   3 -25  -1  170.88   26.80
  -3 -25   1  161.98   30.80
  -3 -25   1  179.28   32.70
  -3 -25   1  174.58   14.20
  -3 -25   1  188.08   14.20
   3 -25  -1  145.19   22.20
  -3  25   1  195.08   36.80
   3  25  -1  204.38   34.80
  -3  25   1  186.08   27.30
   3  25  -1  184.28   42.80
  -2 -25   1    6.40   11.10
  -2 -25   1   18.20    6.70
   2 -25  -1    1.90    7.00
  -2 -25   1    4.20   12.80
   2 -25  -1   -1.10    8.10
  -2 -25   1   -6.20    4.30
   2  25  -1   -0.10   13.00
   2  25  -1   18.80   19.70
  -2  25   1   23.20   15.50
  -2  25   1    1.00    9.00
  -1 -25   1   77.29   12.70
  -1 -25   1   66.69   12.60
   1 -25  -1   87.39   17.30
   1 -25  -1   42.00   11.90
  -1 -25   1   89.19   24.30
   1  25  -1   66.49   22.50
  -1  25   1   64.79   14.10
  -1  25   1   52.69   20.90
   1  25  -1   57.99   26.20
   0 -25   1  203.18   22.80
   0 -25  -1  160.58   19.80
   0 -25   1  170.58   31.50
   0 -25  -1  197.78   32.60
   0 -25   1  200.28   21.70
   0 -25  -1  176.58   22.10
   0  25  -1  193.78   15.20
   0  25   1  202.48   44.20
   0  25   1  180.48   21.80
   0  25  -1  187.78   18.10
   0  25  -1  199.58   43.20
   0  25   1  219.18   37.90
   0  25   1  193.98   17.10
   0  25  -1  221.78   39.30
   1 -25   1   46.90   18.30
   1 -25   1   50.29   11.90
  -1 -25  -1   42.80   10.70
  -1 -25  -1   40.10   19.10
  -1 -25  -1   41.70   11.50
   1 -25   1   62.29   14.50
   1  25   1   54.79   25.70
   1  25   1   77.99   24.20
  -1  25  -1   29.10   10.90
  -1  25  -1   61.79   21.40
   2 -25   1  633.44   42.30
  -2 -25  -1  727.93   53.09
   2 -25   1  692.93   40.60
  -2 -25  -1  574.44   32.90
  -2 -25  -1  666.63   35.00
   2  25   1  616.34   52.79
  -2  25  -1  658.13   41.50
  -2  25  -1  656.23   56.19
   2  25   1  620.94   64.29
   3 -25   1   18.10   10.00
  -3 -25  -1   14.60    6.00
  -3 -25  -1   16.20    7.50
   3 -25   1   29.50   10.70
   3  25   1   33.80   17.00
  -3  25  -1   25.80   18.40
   3  25   1   44.30   23.20
  -3  25  -1   27.90   12.90
  -4 -25  -1  359.56   35.90
   4 -25   1  351.76   34.80
  -4 -25  -1  342.57   21.60
  -4 -25  -1  326.97   22.00
  -4 -25  -1  352.06   44.80
   4 -25   1  365.86   31.80
  -4  25  -1  296.27   31.70
  -4  25  -1  363.86   48.10
   4  25   1  362.66   62.79
   5 -25   1   25.20   13.90
  -5 -25  -1   23.40    7.70
   5 -25   1   14.60   11.10
  -5 -25  -1   -9.20   12.90
   5  25   1   22.30   16.30
  -5  25  -1   23.20   12.60
   5  25   1   24.50   22.60
  -5  25  -1   39.60   19.40
  -6 -25  -1  144.09   18.60
   6 -25   1  166.58   31.30
   6 -25   1  149.88   26.80
   6  25   1  134.59   39.90
  -6  25  -1  125.19   31.10
  -6  25  -1   93.79   24.10
  -7 -25  -1   11.90    6.90
   7 -25   1   -4.10   10.40
   7 -25   1    5.40   11.50
  -7  25  -1  -18.20   10.60
  -7  25  -1   50.49   20.50
   7  25   1   34.40   23.90
   8 -25   1   29.50   20.20
   8 -25   1   83.49   24.10
  -8 -25  -1   91.69   16.60
   8  25   1   27.60   26.60
  -8  25  -1   56.49   28.10
  -8  25  -1   59.99   27.80
   9 -25   1   13.40   15.70
   9 -25   1   22.70   20.90
  -9 -25  -1   16.50   11.30
   9  25   1   37.50   27.80
  -9  25  -1   11.60   22.50
  -9  25  -1    1.80   22.50
 -10 -25  -1   43.90   16.50
  10 -25   1   71.59   26.40
 -10  25  -1   63.89   24.40
  10  25   1   16.00   26.40
 -10  25  -1   71.09   28.60
 -11 -25  -1  -13.50   12.70
 -11  25  -1   -0.40   25.60
  11  25   1   10.10   24.40
 -11  25  -1  -21.10   22.80
 -12 -25  -1   57.19   23.80
 -12  25  -1    6.90   25.80
  12  25   1   38.70   35.30
 -12 -26   1    2.10   14.70
 -12  26   1  -37.10   21.80
 -12  26   1   24.00   23.80
  12  26  -1   20.30   26.40
 -11 -26   1   55.89   19.20
  11  26  -1   22.20   29.40
 -11  26   1   22.70   26.60
 -11  26   1   68.19   38.20
 -10 -26   1    5.50   11.00
  10 -26  -1    7.40   21.20
  10  26  -1    7.40   25.40
 -10  26   1   53.29   24.30
 -10  26   1   37.00   25.60
   9 -26  -1   12.30   16.50
   9 -26  -1   32.40   21.20
  -9 -26   1   10.30    8.80
   9  26  -1   27.00   24.30
  -9  26   1   12.30   23.50
  -9  26   1   13.60   21.00
   8 -26  -1   31.20   19.90
   8 -26  -1   10.30   13.80
  -8 -26   1   15.00    9.00
  -8  26   1  -10.50   20.50
   8  26  -1   23.50   29.20
  -8  26   1   20.80   22.30
   7 -26  -1   -4.30   10.80
  -7 -26   1  -11.20    5.20
   7 -26  -1   14.10   13.00
  -7  26   1    8.00   16.20
  -7  26   1  -15.00   11.60
   7  26  -1   19.50   21.60
   6 -26  -1   25.80   14.30
  -6 -26   1   23.50    7.60
   6 -26  -1   54.89   19.00
  -6  26   1   28.10   15.70
   6  26  -1   46.80   30.20
  -6  26   1   -1.10   15.20
   5 -26  -1   48.90   16.30
  -5 -26   1   76.19   10.30
   5 -26  -1   59.29   20.00
  -5 -26   1   61.99   22.50
  -5  26   1   54.79   25.10
  -5  26   1   59.99   19.00
   5  26  -1   53.69   30.00
   4 -26  -1    7.80    8.90
   4 -26  -1    3.20   10.50
  -4 -26   1   16.90   13.30
  -4 -26   1    3.80    4.70
  -4 -26   1   30.80   19.10
   4  26  -1    4.00   22.10
   4  26  -1    7.30   14.90
  -4  26   1   -3.70   11.00
  -4  26   1   22.50   18.80
  -3 -26   1  -15.50   10.00
  -3 -26   1    3.20    5.40
   3 -26  -1    0.00    8.20
  -3 -26   1    9.60    4.70
  -3 -26   1    3.30   12.20
   3 -26  -1   -5.30    7.40
  -3  26   1    3.80   13.80
  -3  26   1    8.60   10.60
   3  26  -1   -5.00   12.00
   3  26  -1   36.90   23.50
   2 -26  -1   26.50   11.30
  -2 -26   1   34.10   14.70
   2 -26  -1   30.20   10.90
  -2 -26   1   38.70    8.30
  -2 -26   1   27.90    7.90
  -2 -26   1   38.90   17.90
   2  26  -1   36.10   21.80
   2  26  -1   13.20   16.70
  -2  26   1   37.20   17.80
  -2  26   1   44.80   13.60
  -1 -26   1   94.59   14.60
   1 -26  -1   80.89   17.40
  -1 -26   1   54.99   19.80
  -1 -26   1   68.99   13.50
   1 -26  -1   79.79   16.00
  -1  26   1  102.19   17.80
  -1  26   1   90.59   26.30
   1  26  -1   55.09   21.30
   1  26  -1  108.39   32.20
   0 -26  -1  111.89   30.10
   0 -26   1   89.69   26.60
   0 -26  -1  115.89   18.40
   0 -26   1  114.49   16.40
   0 -26   1  133.69   18.60
   0 -26  -1  107.59   16.80
   0  26  -1  121.69   15.60
   0  26   1  152.28   31.40
   0  26   1   50.69   19.50
   0  26  -1  108.79   34.30
   0  26  -1  117.79   28.40
   0  26  -1  120.79   12.50
   0  26   1  140.19   38.60
   0  26   1  119.29   15.40
  -1 -26  -1  657.73   36.00
  -1 -26  -1  585.94   51.39
  -1 -26  -1  652.53   37.70
   1 -26   1  621.54   37.50
   1 -26   1  659.63   40.90
  -1  26  -1  624.14   36.90
   1  26   1  649.93   64.09
  -1  26  -1  679.83   58.19
   1  26   1  621.64   55.49
  -2 -26  -1  154.48   30.20
   2 -26   1  110.69   20.60
  -2 -26  -1   79.29   13.00
  -2 -26  -1   61.39   12.90
   2 -26   1   86.59   16.90
  -2  26  -1  114.29   20.30
   2  26   1  134.29   28.60
  -2  26  -1   85.29   25.40
   2  26   1  107.49   33.40
  -3 -26  -1  292.57   20.30
   3 -26   1  261.47   34.10
  -3 -26  -1  402.26   49.50
   3 -26   1  225.98   28.50
  -3 -26  -1  315.87   21.80
  -3  26  -1  292.87   30.20
   3  26   1  297.37   54.89
   3  26   1  263.27   39.60
  -3  26  -1  299.27   47.70
  -4 -26  -1  295.97   41.60
  -4 -26  -1  212.08   18.00
  -4 -26  -1  204.38   16.60
   4 -26   1  235.28   30.80
   4 -26   1  152.88   27.40
   4  26   1  344.17   62.69
  -4  26  -1  181.08   37.80
   4  26   1  145.99   31.70
  -4  26  -1  214.78   31.50
  -5 -26  -1   39.20   10.40
   5 -26   1   66.39   17.60
  -5 -26  -1    3.70   11.90
  -5 -26  -1   35.20    8.20
   5 -26   1   34.90   14.70
   5  26   1   26.40   25.60
  -5  26  -1   47.90   24.10
  -5  26  -1   49.80   17.20
   6 -26   1  108.69   27.60
  -6 -26  -1  124.59   17.30
   6 -26   1  124.69   25.90
  -6  26  -1  113.09   31.50
   6  26   1  117.49   37.80
  -6  26  -1   78.29   24.20
   7 -26   1   -0.70   11.20
  -7 -26  -1   24.80    8.70
   7 -26   1    7.00   16.60
  -7  26  -1    1.40   14.60
  -7  26  -1   23.20   16.00
   7  26   1   13.40   23.50
  -8 -26  -1   86.79   15.80
   8 -26   1   69.69   24.20
   8 -26   1   15.50   18.30
  -8  26  -1   47.80   31.80
  -8  26  -1   37.90   28.00
   8  26   1   26.20   25.00
   9 -26   1   86.39   27.20
   9 -26   1   84.69   29.50
  -9 -26  -1  122.59   21.20
  -9  26  -1  135.49   38.90
   9  26   1   94.29   38.70
  -9  26  -1  120.59   36.70
  10 -26   1   91.99   31.20
 -10 -26  -1   19.80   14.50
 -10  26  -1   18.30   23.70
 -10  26  -1   36.70   21.60
  10  26   1   15.00   22.20
 -11 -26  -1  266.37   35.90
 -11  26  -1  322.77   54.09
 -11  26  -1  172.48   44.00
 -12 -26  -1  178.48   32.70
 -12  26  -1  191.88   50.99
  12  26   1  146.69   48.80
 -12 -27   1    9.80   14.60
 -12  27   1  -49.10   27.00
  12  27  -1  -15.60   26.90
 -11 -27   1  147.39   25.80
 -11  27   1  104.69   37.20
 -11  27   1  126.59   36.20
  11  27  -1  120.59   48.60
  10 -27  -1  -12.70   18.40
 -10 -27   1    8.30   10.80
 -10  27   1    2.80   20.00
  10  27  -1   40.70   30.10
 -10  27   1   26.50   26.60
   9 -27  -1   97.99   29.80
   9 -27  -1   86.29   26.80
  -9 -27   1  110.79   19.10
  -9  27   1   91.99   32.50
   9  27  -1  107.39   43.00
  -9  27   1  101.59   34.70
   8 -27  -1   11.30   17.90
  -8 -27   1    7.20    6.80
   8 -27  -1   26.20   17.10
  -8  27   1   41.80   28.40
   8  27  -1    5.70   21.60
  -8  27   1  -21.40   19.30
   7 -27  -1    6.80   13.40
  -7 -27   1   10.30    7.70
   7 -27  -1   28.00   17.60
   7  27  -1   11.50   24.70
  -7  27   1   21.70   16.20
  -7  27   1   40.10   19.20
  -6 -27   1   15.20    7.60
   6 -27  -1   -6.80   11.00
   6 -27  -1   33.90   18.60
  -6  27   1   -9.40   12.50
  -6  27   1   -0.50   18.90
   6  27  -1    2.30   21.20
   5 -27  -1   17.20   14.10
   5 -27  -1   45.40   17.20
  -5 -27   1   30.10    7.20
  -5 -27   1   23.30   17.50
   5  27  -1    1.40   11.80
  -5  27   1   20.90   13.20
   5  27  -1   -4.90   21.20
  -5  27   1    4.80   14.30
   4 -27  -1   35.90   13.40
  -4 -27   1   34.30    7.90
   4 -27  -1   44.90   16.60
  -4 -27   1   64.09   22.00
  -4 -27   1   64.59   18.40
   4  27  -1   17.90   17.30
   4  27  -1  -22.90   16.40
  -4  27   1   51.79   16.90
  -4  27   1   33.50   20.70
  -3 -27   1   -1.80   11.90
  -3 -27   1   17.50    6.60
  -3 -27   1  -20.30   11.60
   3 -27  -1   12.20   11.40
  -3 -27   1    4.70    5.90
   3 -27  -1    8.50    9.50
   3  27  -1    1.80   20.90
  -3  27   1   -4.70    8.90
   3  27  -1    7.60   14.60
  -3  27   1   -5.60   11.80
  -2 -27   1   21.90   14.00
  -2 -27   1   34.90    8.50
   2 -27  -1   23.50   11.30
   2 -27  -1   35.40   13.40
  -2 -27   1   27.50    8.00
  -2 -27   1   24.10   15.30
   2  27  -1   24.60   17.00
  -2  27   1   14.70   17.90
  -2  27   1   12.20   11.30
   2  27  -1   25.60   21.90
   1 -27  -1   39.20   12.80
   1 -27  -1   32.60   11.80
  -1 -27   1   56.19   12.60
  -1 -27   1   48.10   10.90
  -1  27   1   17.90   17.50
   1  27  -1   40.40   20.20
   1  27  -1   59.89   25.40
  -1  27   1   37.60   12.10
   0 -27  -1  120.39   18.60
   0 -27   1  170.48   20.40
   0 -27  -1  130.89   19.90
   0 -27   1  138.29   20.40
   0  27  -1  100.89   35.10
   0  27  -1  105.29   28.60
   0  27   1  147.29   16.70
   0  27   1  176.38   35.20
   0  27   1  172.98   42.50
   1 -27   1  230.08   27.70
  -1 -27  -1  209.58   34.60
  -1 -27  -1  203.28   23.90
  -1 -27  -1  215.58   23.20
   1 -27   1  228.48   22.00
  -1  27  -1  211.68   38.10
   1  27   1  279.97   43.40
  -1  27  -1  261.07   22.50
   1  27   1  287.17   52.49
  -2 -27  -1  186.08   21.60
   2 -27   1  299.67   28.30
   2 -27   1  141.79   22.80
  -2 -27  -1  238.88   41.00
  -2 -27  -1  219.38   22.10
  -2  27  -1  225.98   41.30
  -2  27  -1  219.28   27.70
   2  27   1  193.08   47.00
   2  27   1  251.87   42.60
  -3 -27  -1   36.20   19.60
   3 -27   1   -1.60    8.40
  -3 -27  -1   11.30    6.30
  -3 -27  -1   27.70   14.70
  -3 -27  -1   16.40    6.30
   3 -27   1    5.80    8.80
  -3  27  -1   -1.40   11.90
  -3  27  -1   12.10   10.90
   3  27   1   -3.20   12.80
   3  27   1  -11.10   19.30
   4 -27   1   52.59   17.30
  -4 -27  -1   62.69   11.80
  -4 -27  -1   58.19   21.50
  -4 -27  -1   77.09   12.50
   4 -27   1   59.49   17.60
   4  27   1   60.79   32.50
  -4  27  -1   60.19   21.60
   4  27   1   22.90   16.50
  -4  27  -1   58.99   18.20
   5 -27   1   46.60   17.50
   5 -27   1   76.49   21.60
  -5 -27  -1   45.50   11.50
  -5 -27  -1   42.40   20.60
  -5 -27  -1   81.49   12.20
   5  27   1   50.89   29.50
  -5  27  -1   59.69   22.00
  -5  27  -1   49.50   26.80
   6 -27   1   35.10   14.70
  -6 -27  -1   27.10   10.50
   6 -27   1   57.29   21.40
   6  27   1   41.90   27.70
  -6  27  -1   65.59   21.20
  -6  27  -1   46.00   17.80
  -7 -27  -1  124.09   18.80
   7 -27   1   65.59   25.80
   7 -27   1   67.19   21.10
   7  27   1   77.59   34.60
  -7  27  -1   44.30   21.90
  -7  27  -1  119.49   35.20
  -8 -27  -1   14.80    8.70
   8 -27   1   -8.50   12.90
   8 -27   1   -1.60   14.30
  -8  27  -1  -18.50   22.00
   8  27   1   15.00   21.40
  -8  27  -1    3.50   17.20
   9 -27   1   38.80   22.00
   9 -27   1   24.60   21.30
  -9 -27  -1   31.30   12.10
  -9  27  -1  -15.40   13.70
  -9  27  -1   39.90   25.00
   9  27   1   22.90   26.90
 -10 -27  -1  143.69   24.50
  10 -27   1  184.38   42.60
 -10  27  -1   98.79   32.10
  10  27   1   49.70   33.00
 -10  27  -1  113.89   38.10
 -11 -27  -1   14.00   15.80
  11  27   1   -7.70   23.40
 -11  27  -1  137.99   39.00
 -11  27  -1    8.60   23.60
 -12 -27  -1  212.58   34.40
  12  27   1  148.59   51.19
 -12  27  -1  106.29   42.60
 -11 -28   1   24.90   12.50
 -11  28   1    8.00   26.10
  11  28  -1   50.39   33.50
 -11  28   1   21.80   24.60
  10 -28  -1  352.66   55.19
 -10 -28   1  412.26   32.70
 -10  28   1  270.27   53.19
 -10  28   1  477.25   67.49
  10  28  -1  285.27   63.69
   9 -28  -1  160.78   38.50
  -9 -28   1   95.59   17.10
   9 -28  -1  102.49   28.40
   9  28  -1  100.99   41.70
  -9  28   1   31.90   23.70
  -9  28   1   25.10   26.40
  -8 -28   1  182.58   20.50
   8 -28  -1  139.09   33.10
   8 -28  -1  170.38   34.40
   8  28  -1  101.69   42.00
  -8  28   1  144.09   36.50
  -8  28   1  185.78   39.80
   7 -28  -1   18.00   15.50
   7 -28  -1   52.59   20.80
  -7 -28   1   37.80   10.30
  -7  28   1   25.50   18.30
   7  28  -1   42.70   34.10
  -7  28   1   -0.70   16.60
  -6 -28   1    4.40    7.30
   6 -28  -1    1.30   12.00
   6 -28  -1   19.20   16.00
  -6  28   1   15.00   15.10
   6  28  -1    8.90   26.50
  -6  28   1   22.50   16.40
   5 -28  -1   38.60   16.90
  -5 -28   1   36.10    7.90
  -5 -28   1   11.20   15.10
   5 -28  -1   61.19   20.10
  -5  28   1   25.80   18.30
  -5  28   1   21.80   17.20
   5  28  -1   82.19   36.00
   4 -28  -1    0.40    9.20
   4 -28  -1    7.90    8.80
  -4 -28   1   -6.30    5.00
  -4 -28   1    1.70   11.40
  -4 -28   1    7.30    4.30
  -4  28   1   10.60   10.70
   4  28  -1   11.60   19.20
   4  28  -1   -2.50   12.70
  -4  28   1   -2.20   14.30
  -3 -28   1  112.49   14.00
  -3 -28   1  121.69   14.30
   3 -28  -1  120.99   21.70
   3 -28  -1  110.09   24.10
  -3 -28   1   97.39   26.80
  -3  28   1   99.89   29.30
  -3  28   1   69.59   19.40
   3  28  -1   77.69   33.00
   3  28  -1   97.19   28.40
   2 -28  -1   94.99   20.10
  -2 -28   1   65.89   12.00
   2 -28  -1   90.89   18.00
  -2 -28   1   75.09   12.70
  -2 -28   1   32.10   17.40
   2  28  -1   63.99   30.50
  -2  28   1  113.39   32.90
   2  28  -1   80.39   26.40
  -2  28   1   67.29   17.10
  -1 -28   1  182.08   21.20
   1 -28  -1  159.98   22.60
  -1 -28   1  158.98   19.90
   1 -28  -1  159.08   23.70
  -1  28   1  184.68   22.70
   1  28  -1  194.88   42.80
   1  28  -1  116.99   32.70
  -1  28   1  175.98   36.00
   0 -28   1  572.34   37.80
   0 -28   1  553.54   35.60
   0 -28  -1  553.94   36.10
   0 -28  -1  563.74   38.50
   0  28  -1  553.54   55.29
   0  28   1  719.13   87.69
   0  28   1  740.93   61.69
   0  28  -1  656.93   80.19
   0  28   1  558.74   30.00
  -1 -28  -1   35.40   11.60
   1 -28   1   17.70    8.70
  -1 -28  -1   13.70    8.90
  -1  28  -1   29.80   11.90
  -1  28  -1   49.30   22.10
   1  28   1   27.60   19.20
   1  28   1   37.80   24.00
  -2 -28  -1  220.78   21.80
  -2 -28  -1  290.27   48.90
   2 -28   1  272.27   26.20
   2 -28   1  304.97   35.10
  -2 -28  -1  293.67   22.50
   2  28   1  306.37   57.09
   2  28   1  284.37   44.30
  -2  28  -1  256.77   26.20
  -2  28  -1  275.77   46.20
  -3 -28  -1   32.00   17.70
  -3 -28  -1   24.90   13.30
  -3 -28  -1   24.00    8.60
  -3 -28  -1   19.70    7.80
   3 -28   1   18.30   11.10
   3 -28   1   25.00   13.80
  -3  28  -1    3.40   11.00
  -3  28  -1   19.30   20.90
   3  28   1    7.30   13.60
   3  28   1   -0.40   21.50
   4 -28   1   15.40   12.20
   4 -28   1   -0.10    9.70
  -4 -28  -1   -4.10    6.30
  -4 -28  -1   12.20    7.50
  -4 -28  -1  -16.70    7.00
  -4  28  -1   -0.50   10.60
  -4  28  -1   20.20   20.40
   4  28   1   10.40   23.80
   4  28   1  -10.80   12.60
  -5 -28  -1    4.50    6.40
  -5 -28  -1   10.30    6.90
   5 -28   1  -10.40    9.20
   5 -28   1    6.00   13.90
   5  28   1   -4.30   21.20
  -5  28  -1    0.70   20.00
  -5  28  -1   -0.50   12.50
  -6 -28  -1   46.70   12.60
   6 -28   1   79.19   21.60
   6 -28   1   76.09   24.70
   6  28   1   52.29   32.10
  -6  28  -1   98.39   26.10
  -6  28  -1  106.09   31.80
   7 -28   1   64.39   26.30
  -7 -28  -1   86.59   15.80
   7 -28   1   51.99   20.90
   7  28   1   27.00   29.50
  -7  28  -1  166.68   41.00
  -7  28  -1   52.99   23.10
   8 -28   1   17.90   16.50
  -8 -28  -1   11.80   10.90
   8 -28   1    3.10   14.80
  -8  28  -1   10.40   20.30
  -8  28  -1   -5.00   21.90
   8  28   1  -12.30   22.30
   9 -28   1    7.00   16.70
   9 -28   1   26.30   19.20
  -9 -28  -1    3.10    8.50
   9  28   1   25.60   26.00
  -9  28  -1   -2.60   21.40
  -9  28  -1   39.00   25.90
  10 -28   1   27.40   24.20
  10 -28   1   54.79   27.10
 -10 -28  -1   54.19   16.90
 -10  28  -1   64.09   29.90
  10  28   1   36.20   33.30
 -10  28  -1   18.50   27.40
 -11 -28  -1  -27.50   11.60
 -11  28  -1   50.09   30.10
  11  28   1    8.10   31.90
 -11  28  -1   -2.60   29.10
 -11 -29   1  105.49   20.60
  11  29  -1   54.79   33.00
 -11  29   1   68.29   31.60
  10 -29  -1  149.59   38.10
 -10 -29   1  144.89   21.70
  10  29  -1  137.69   49.20
 -10  29   1  142.69   40.90
 -10  29   1  137.49   41.90
   9 -29  -1   20.20   18.70
  -9 -29   1   14.20    9.60
   9 -29  -1   39.40   22.20
   9  29  -1   41.10   31.60
  -9  29   1   68.69   30.20
  -9  29   1   27.40   27.30
  -8 -29   1  302.77   24.20
   8 -29  -1  325.97   49.99
   8 -29  -1  290.27   42.60
  -8  29   1  409.36   60.79
   8  29  -1  331.37   65.09
  -8  29   1  228.68   46.00
  -7 -29   1   47.00   11.10
   7 -29  -1   22.80   16.50
   7 -29  -1   18.60   19.60
   7  29  -1   43.90   32.90
  -7  29   1   18.70   18.20
  -7  29   1   58.39   24.40
  -6 -29   1   45.50   10.70
   6 -29  -1   41.90   20.20
   6 -29  -1   56.19   21.30
  -6  29   1   56.29   22.80
  -6  29   1   19.80   16.40
   6  29  -1   42.00   31.90
   5 -29  -1    1.40   10.10
  -5 -29   1   20.30    6.70
   5 -29  -1    1.60   13.20
  -5 -29   1   23.80   15.10
   5  29  -1    8.30   26.30
  -5  29   1   17.90   15.30
  -5  29   1  -10.00   11.80
  -4 -29   1   13.30    7.30
   4 -29  -1    8.70   13.30
  -4 -29   1   14.60    6.40
  -4 -29   1    7.00   15.80
   4 -29  -1   10.00   11.10
  -4  29   1   29.30   20.70
   4  29  -1   46.70   31.60
   4  29  -1   34.30   21.00
  -4  29   1   17.80   15.30
   3 -29  -1   -9.80    7.90
  -3 -29   1  -14.20    7.50
   3 -29  -1   30.20   14.30
  -3 -29   1    0.60    6.00
  -3 -29   1   -0.10    4.80
  -3  29   1    7.10   18.00
   3  29  -1   -1.00   14.90
  -3  29   1   18.40   13.80
   3  29  -1   19.00   23.00
  -2 -29   1  466.65   56.49
  -2 -29   1  345.77   24.10
  -2 -29   1  439.26   27.20
   2 -29  -1  334.07   30.50
   2 -29  -1  360.86   34.00
   2  29  -1  395.56   52.89
  -2  29   1  381.06   52.69
  -2  29   1  352.86   31.40
   2  29  -1  442.86   70.99
  -1 -29   1    6.30    7.80
   1 -29  -1   11.20    9.10
   1 -29  -1  -11.20    6.80
  -1 -29   1   31.60   10.40
   1  29  -1   10.70   19.10
  -1  29   1    7.00   18.90
  -1  29   1   19.50   10.70
   1  29  -1   22.10   23.40
   0 -29  -1  246.18   29.60
   0 -29   1  256.57   27.20
   0 -29   1  292.67   25.90
   0 -29  -1  215.58   26.10
   0  29   1  258.27   18.20
   0  29   1  289.67   45.50
   0  29   1  227.28   49.70
   0  29  -1  269.57   51.99
   0  29  -1  202.18   38.70
  -1 -29  -1   12.80    9.40
   1 -29   1   16.20    9.00
   1 -29   1   20.70   10.60
  -1 -29  -1   32.90   10.50
  -1  29  -1   21.70   17.70
   1  29   1   14.30   17.10
  -1  29  -1   21.30    9.90
   1  29   1   40.50   25.80
   2 -29   1   65.69   18.30
  -2 -29  -1   54.69   12.70
   2 -29   1   77.89   16.40
  -2 -29  -1   33.10   12.60
  -2  29  -1   82.59   27.30
   2  29   1   37.40   29.60
  -2  29  -1   54.59   14.60
   2  29   1   62.69   24.00
  -3 -29  -1   60.99   11.00
   3 -29   1   66.59   18.20
   3 -29   1   55.59   18.00
  -3 -29  -1   81.49   13.20
  -3 -29  -1   45.30   18.50
   3  29   1   78.09   33.10
   3  29   1   34.00   20.80
  -3  29  -1   70.39   19.10
  -3  29  -1   29.60   22.30
  -4 -29  -1   32.80   10.20
  -4 -29  -1    5.90    7.30
   4 -29   1    8.70   12.30
   4 -29   1    6.60   11.00
  -4 -29  -1  -22.30   14.50
  -4  29  -1   15.20   13.00
   4  29   1   19.80   17.60
   4  29   1   21.50   27.90
  -4  29  -1   21.70   20.00
  -5 -29  -1  201.28   20.80
   5 -29   1  267.57   40.50
  -5 -29  -1  218.48   20.50
   5 -29   1  206.18   32.00
  -5  29  -1  166.78   37.10
  -5  29  -1  209.28   34.50
   5  29   1  229.78   55.89
  -6 -29  -1   44.10   10.60
  -6 -29  -1    7.70    9.80
   6 -29   1   10.80   12.40
   6 -29   1   27.50   18.30
  -6  29  -1    2.00   16.40
   6  29   1   19.60   30.80
  -6  29  -1   28.80   18.00
   7 -29   1    6.50   15.10
   7 -29   1   48.00   23.00
  -7 -29  -1    2.80    9.70
  -7  29  -1   14.10   16.60
  -7  29  -1   45.50   21.00
   7  29   1   19.60   29.00
   8 -29   1  354.56   48.60
  -8 -29  -1  398.06   30.20
   8 -29   1  373.76   54.09
  -8  29  -1  441.56   59.59
  -8  29  -1  429.66   66.39
   8  29   1  226.78   57.19
   9 -29   1   14.70   17.20
   9 -29   1   44.40   23.30
  -9 -29  -1   19.90   13.00
  -9  29  -1   17.90   22.10
   9  29   1   13.40   31.00
  -9  29  -1   -0.60   21.70
  10 -29   1  164.38   41.00
  10 -29   1  161.98   38.60
 -10 -29  -1  190.18   27.20
 -10  29  -1  165.88   45.80
 -10  29  -1  228.58   49.70
  10  29   1  161.68   48.10
 -11 -29  -1   62.69   19.00
 -11  29  -1   44.00   27.60
  11  29   1    9.10   30.60
 -11  30   1   27.80   21.50
 -10 -30   1  164.28   23.70
  10 -30  -1  132.89   44.20
  10 -30  -1  176.38   44.80
  10  30  -1  124.79   46.00
 -10  30   1  132.09   42.10
   9 -30  -1   77.89   27.60
   9 -30  -1   77.89   29.00
  -9 -30   1   82.89   15.60
  -9  30   1   47.90   34.40
  -9  30   1   53.29   32.60
   9  30  -1   71.29   42.70
  -8 -30   1  388.76   26.50
   8 -30  -1  345.67   49.30
   8 -30  -1  383.76   55.19
   8  30  -1  297.47   66.69
  -8  30   1  299.17   49.10
  -8  30   1  349.27   57.09
   7 -30  -1   22.80   17.50
  -7 -30   1   10.20    8.20
   7 -30  -1   19.70   17.10
   7  30  -1    5.90   26.10
  -7  30   1   11.60   21.30
  -7  30   1    7.60   14.00
  -6 -30   1   87.59   12.10
   6 -30  -1   65.79   23.90
  -6 -30   1   98.49   14.70
   6 -30  -1   39.80   19.20
  -6  30   1   68.49   23.00
   6  30  -1   61.69   36.70
  -6  30   1   98.59   32.20
   5 -30  -1    2.50   11.20
  -5 -30   1   15.70    6.50
   5 -30  -1   -2.70   12.20
  -5 -30   1   15.60   25.30
  -5  30   1   -5.50   11.70
  -5  30   1   25.90   22.40
   5  30  -1   -7.10   23.30
   4 -30  -1   -2.90   11.30
   4 -30  -1    3.50   11.30
  -4 -30   1   23.10   15.70
  -4 -30   1   -8.10    6.00
  -4 -30   1   -1.70    4.90
  -4  30   1   -2.00   12.00
  -4  30   1   -0.70   20.20
   4  30  -1    0.40   23.80
   4  30  -1   -0.90   15.60
   3 -30  -1    7.50   12.20
  -3 -30   1    7.80   11.80
  -3 -30   1    1.90    4.90
  -3 -30   1    2.70    6.50
   3 -30  -1    6.10   10.30
   3  30  -1  -13.30   19.10
   3  30  -1    5.10   17.40
  -3  30   1  -15.00   16.70
  -3  30   1    8.80   12.20
  -2 -30   1   73.89   27.30
  -2 -30   1   67.89   13.40
  -2 -30   1  114.59   15.10
   2 -30  -1   92.19   21.30
   2 -30  -1   53.49   15.80
  -2  30   1   60.09   17.10
   2  30  -1   79.19   28.30
   2  30  -1   67.59   29.90
  -2  30   1  117.89   30.50
   1 -30  -1   28.20   13.40
   1 -30  -1   19.90   10.80
  -1 -30   1   36.50    9.90
  -1 -30   1   61.69   24.80
  -1 -30   1   30.80   13.10
   1  30  -1   47.60   22.80
  -1  30   1    5.60   15.10
  -1  30   1   26.60   11.30
   1  30  -1   13.00   22.20
   0 -30  -1  333.87   27.70
   0 -30  -1  304.27   33.70
   0 -30   1  278.17   24.30
   0 -30   1  346.87   30.20
   0  30  -1  351.46   52.69
   0  30   1  400.16   56.89
   0  30   1  362.06   63.79
   0  30  -1  410.26   62.29
  -1 -30  -1  138.79   21.10
  -1 -30  -1  192.48   22.20
   1 -30   1  188.48   25.00
   1 -30   1  169.68   25.10
   1  30   1  187.88   38.40
  -1  30  -1  167.38   21.10
   1  30   1  149.39   42.10
  -1  30  -1  239.28   45.30
  -2 -30  -1  379.96   25.90
   2 -30   1  342.57   30.30
   2 -30   1  453.05   37.50
  -2 -30  -1  353.06   27.90
  -2  30  -1  461.15   62.09
   2  30   1  437.36   58.99
  -2  30  -1  323.87   30.30
   2  30   1  418.86   70.29
   3 -30   1  234.18   30.30
  -3 -30  -1  178.48   36.00
  -3 -30  -1  206.78   22.00
  -3 -30  -1  251.17   21.10
   3 -30   1  252.07   36.00
   3  30   1  225.38   52.79
  -3  30  -1  255.87   33.40
  -3  30  -1  229.78   45.00
   3  30   1  206.88   38.80
  -4 -30  -1  343.27   24.00
   4 -30   1  332.27   43.00
  -4 -30  -1  319.87   47.80
   4 -30   1  338.97   40.30
  -4 -30  -1  412.76   27.40
   4  30   1  313.47   61.89
  -4  30  -1  374.46   38.30
   4  30   1  322.87   48.70
  -4  30  -1  341.07   52.99
   5 -30   1  109.39   25.70
   5 -30   1  133.49   26.50
  -5 -30  -1   79.99   15.40
  -5 -30  -1  119.69   16.40
  -5  30  -1  107.39   25.80
  -5  30  -1  130.39   36.70
   5  30   1  131.99   45.10
  -6 -30  -1   17.20    9.90
   6 -30   1   53.79   19.20
  -6 -30  -1   48.20   11.10
   6 -30   1   42.00   18.90
  -6  30  -1    7.60   13.20
   6  30   1   30.80   28.60
  -6  30  -1   38.70   25.50
  -7 -30  -1  260.67   23.90
  -7 -30  -1  230.08   23.50
   7 -30   1  203.78   38.70
   7 -30   1  260.97   39.70
  -7  30  -1  229.68   43.70
  -7  30  -1  269.37   46.00
   7  30   1  233.38   61.89
   8 -30   1   13.00   15.90
  -8 -30  -1   16.70   10.90
   8 -30   1   36.10   20.30
  -8  30  -1   -4.90   15.10
   8  30   1   21.30   32.90
  -8  30  -1   24.10   26.80
  -9 -30  -1  171.48   23.50
   9 -30   1  196.98   40.60
   9 -30   1  172.78   39.90
  -9  30  -1  113.59   41.20
   9  30   1  135.29   48.10
  -9  30  -1  204.98   50.69
  10 -30   1  106.39   31.90
  10 -30   1   89.79   34.30
 -10 -30  -1  105.89   21.90
 -10  30  -1  106.39   37.50
  10  30   1  105.29   44.00
  10 -31  -1   -2.50   21.60
 -10 -31   1    4.80   10.50
  10 -31  -1   17.10   21.40
  10  31  -1    8.80   32.10
 -10  31   1   -9.40   23.50
   9 -31  -1   82.39   27.10
  -9 -31   1  120.59   18.60
   9 -31  -1   86.29   29.00
   9  31  -1   54.69   40.90
  -9  31   1   75.99   36.70
   8 -31  -1   65.09   26.00
  -8 -31   1   53.79   11.00
   8 -31  -1   21.70   18.00
  -8  31   1   72.69   29.00
   8  31  -1   39.40   35.30
  -8  31   1   74.09   24.10
   7 -31  -1  209.68   38.50
   7 -31  -1  175.38   34.00
  -7 -31   1  167.88   18.40
   7  31  -1  199.38   55.99
  -7  31   1  136.49   39.40
  -7  31   1  170.48   36.20
  -6 -31   1   68.89   11.00
   6 -31  -1   56.09   21.20
  -6 -31   1   49.40   11.20
   6 -31  -1   75.39   25.30
   6  31  -1   70.39   37.20
  -6  31   1   56.59   35.10
  -6  31   1   73.29   24.60
  -5 -31   1   73.89   11.60
   5 -31  -1   52.09   20.50
   5 -31  -1   56.49   20.10
  -5 -31   1   60.99    9.40
  -5  31   1   81.59   22.40
  -5  31   1   43.90   28.30
   5  31  -1   42.10   31.30
  -4 -31   1   13.50    7.20
  -4 -31   1   31.70   22.30
  -4 -31   1   12.20    7.70
   4 -31  -1   -3.30   10.30
   4 -31  -1   28.40   17.40
  -4  31   1    9.00   14.00
   4  31  -1  -10.70   18.50
  -4  31   1   11.50   22.90
   4  31  -1   15.60   25.20
  -3 -31   1   -1.00    5.50
  -3 -31   1    3.00    7.70
  -3 -31   1   17.00   15.70
   3 -31  -1   -1.60   10.80
   3 -31  -1   -7.80    8.40
   3  31  -1   10.30   25.50
   3  31  -1   -0.10   16.20
  -3  31   1    9.50   11.40
  -3  31   1   13.20   19.70
   2 -31  -1   51.69   15.90
  -2 -31   1   76.89   28.00
  -2 -31   1   28.00   10.10
   2 -31  -1   18.30   15.00
  -2 -31   1   40.70   11.90
  -2  31   1   25.10   12.50
   2  31  -1   16.50   21.40
  -2  31   1   15.10   21.00
   2  31  -1   37.80   25.30
  -1 -31   1    8.00    9.90
  -1 -31   1   17.20    8.10
  -1 -31   1  -12.50   13.60
   1 -31  -1   37.20   13.30
   1 -31  -1    8.40    8.50
   1  31  -1   19.90   24.70
   1  31  -1   28.40   20.50
  -1  31   1   11.20   19.70
  -1  31   1   24.30   10.70
   0 -31  -1    9.40    7.90
   0 -31  -1   14.80   11.70
   0 -31   1    9.10    7.30
   0 -31   1   11.80    9.00
   0  31  -1   43.80   27.20
   0  31   1   35.10   26.90
   0  31   1   34.60   23.30
   0  31  -1   25.30   24.10
  -1 -31  -1    9.50    9.90
   1 -31   1   52.29   15.20
   1 -31   1   75.69   16.10
  -1 -31  -1   33.50   10.00
   1  31   1   69.09   25.00
   1  31   1   39.70   27.50
  -1  31  -1   65.29   13.20
  -1  31  -1   42.60   24.20
  -2 -31  -1  389.16   28.60
   2 -31   1  382.86   35.50
  -2 -31  -1  295.97   24.70
   2 -31   1  302.37   33.60
  -2  31  -1  296.57   29.20
   2  31   1  376.26   64.89
   2  31   1  279.77   47.40
  -2  31  -1  331.47   51.79
  -3 -31  -1   33.50   15.80
   3 -31   1   15.80   12.40
  -3 -31  -1   37.90    9.80
  -3 -31  -1   12.10    9.40
   3 -31   1   24.00   13.40
  -3  31  -1   16.10   13.60
   3  31   1   49.30   24.20
   3  31   1   34.70   27.30
  -3  31  -1   23.10   24.30
  -4 -31  -1  431.56   27.80
  -4 -31  -1  511.85   31.40
   4 -31   1  421.76   39.50
  -4 -31  -1  504.95   60.39
   4 -31   1  461.25   44.10
  -4  31  -1  479.85   66.99
  -4  31  -1  444.76   41.80
   4  31   1  409.86   69.89
   4  31   1  482.55   78.99
   5 -31   1   22.50   14.10
  -5 -31  -1   45.60   10.80
   5 -31   1   67.19   23.50
  -5 -31  -1   43.60   12.50
   5  31   1   98.99   41.40
  -5  31  -1   94.39   32.70
  -5  31  -1   48.10   18.90
  -6 -31  -1  259.27   25.60
   6 -31   1  183.98   35.00
   6 -31   1  243.78   36.80
  -6 -31  -1  250.37   21.10
   6  31   1  199.38   56.59
  -6  31  -1  261.77   43.40
  -6  31  -1  385.96   58.79
   7 -31   1  -11.90   12.20
  -7 -31  -1    1.80    9.30
  -7 -31  -1   12.00    9.90
   7 -31   1   18.60   16.10
   7  31   1  -21.50   24.60
  -7  31  -1   -4.40   13.10
  -7  31  -1    8.40   19.40
   8 -31   1   28.90   20.90
   8 -31   1    8.70   16.90
  -8 -31  -1   21.50   11.40
  -8  31  -1   33.20   28.90
  -8  31  -1   23.00   23.20
   8  31   1  -24.10   25.70
  -9 -31  -1  150.78   22.10
   9 -31   1   96.29   29.40
   9 -31   1  155.98   37.90
   9  31   1   57.29   41.40
  -9  31  -1   92.39   37.30
  10 -31   1   -3.60   18.80
  10 -31   1    1.40   23.20
 -10 -31  -1   18.50   12.60
  10  31   1   35.50   37.00
 -10  31  -1   39.40   25.70
   9 -32  -1   27.00   22.80
   9 -32  -1   14.90   20.10
  -9 -32   1   -3.90    7.10
   9  32  -1    0.00   31.80
  -9  32   1   -2.50   23.10
   8 -32  -1   22.80   23.10
  -8 -32   1   28.30    8.60
   8 -32  -1   16.30   19.00
   8  32  -1   23.20   32.90
  -8  32   1    5.10   21.60
  -8  32   1   60.39   43.90
   7 -32  -1   20.30   17.90
   7 -32  -1    7.50   15.00
  -7 -32   1   -5.40    5.10
   7  32  -1   -8.40   26.90
  -7  32   1   13.30   20.40
  -7  32   1    1.40   15.50
   6 -32  -1  128.39   28.60
  -6 -32   1  149.88   17.40
   6 -32  -1  167.18   35.10
   6  32  -1   45.90   38.00
  -6  32   1  112.69   31.50
  -6  32   1   94.29   40.70
  -5 -32   1    2.30    5.10
  -5 -32   1   11.20    6.40
   5 -32  -1   14.40   13.70
   5 -32  -1   -4.20   13.40
  -5  32   1  -20.80   16.20
   5  32  -1   14.80   27.40
  -5  32   1   14.10   15.00
  -4 -32   1   57.49   26.40
  -4 -32   1   70.59   12.90
   4 -32  -1   56.39   19.20
   4 -32  -1   67.69   22.50
  -4 -32   1   47.90   10.10
   4  32  -1   53.09   26.20
   4  32  -1   54.59   30.60
  -4  32   1   56.79   20.10
  -4  32   1   23.90   24.90
  -3 -32   1   52.49   12.90
  -3 -32   1   55.09   23.30
   3 -32  -1   59.09   19.50
   3 -32  -1   65.29   18.10
  -3 -32   1   51.89   11.00
   3  32  -1   19.50   25.70
  -3  32   1   49.60   24.10
   3  32  -1   70.09   28.70
  -3  32   1   49.20   16.90
  -2 -32   1   19.60   11.10
  -2 -32   1   26.40   22.20
   2 -32  -1   55.19   19.20
   2 -32  -1   52.89   16.90
  -2 -32   1   25.10   10.30
   2  32  -1   12.60   22.90
  -2  32   1   47.90   26.90
   2  32  -1   72.39   29.50
  -2  32   1   56.89   17.20
  -1 -32   1   -1.30   16.90
   1 -32  -1  -17.60    7.70
   1 -32  -1   14.00   10.80
  -1 -32   1   35.60   12.90
  -1 -32   1   10.10    7.60
   1  32  -1  -18.60   24.00
  -1  32   1  -12.40   17.20
  -1  32   1    5.60    9.10
   1  32  -1   22.20   19.40
   0 -32   1  702.63   45.00
   0 -32  -1  613.34   44.60
   0 -32   1  659.73   40.50
   0 -32  -1  633.74   41.10
   0  32  -1  641.94   63.89
   0  32   1  664.73   64.69
   1 -32   1   34.90   12.40
   1 -32   1   17.30   12.70
  -1 -32  -1   11.00    7.20
  -1 -32  -1   21.70   10.50
   1  32   1   14.30   24.10
   1  32   1    2.40   19.80
  -1  32  -1   20.40    9.50
  -1  32  -1   43.80   25.80
  -2 -32  -1  666.23   40.10
  -2 -32  -1  677.23   61.29
  -2 -32  -1  566.74   36.10
   2 -32   1  499.95   40.10
   2 -32   1  601.24   45.60
   2  32   1  649.83   85.79
  -2  32  -1  616.04   74.49
  -2  32  -1  648.84   41.40
   2  32   1  594.14   61.69
  -3 -32  -1   81.69   15.80
   3 -32   1  113.59   24.50
   3 -32   1   87.89   19.90
  -3 -32  -1  104.19   29.00
  -3 -32  -1   99.39   15.40
   3  32   1   72.69   37.90
  -3  32  -1   97.19   32.90
   3  32   1  124.49   34.70
  -3  32  -1  102.79   22.20
  -4 -32  -1   83.69   14.20
   4 -32   1   85.19   22.80
   4 -32   1  111.99   24.60
  -4 -32  -1  117.69   17.80
  -4 -32  -1  108.79   28.30
   4  32   1  121.79   45.70
  -4  32  -1  108.89   35.50
  -4  32  -1  107.09   25.00
   5 -32   1   26.90   15.30
  -5 -32  -1   30.40    8.40
  -5 -32  -1   20.50   11.70
   5 -32   1   25.90   14.70
  -5  32  -1   10.60   21.70
   5  32   1   11.60   26.40
  -5  32  -1   -4.70   13.80
   6 -32   1   12.50   13.00
   6 -32   1    8.60   13.50
  -6 -32  -1    9.70    7.50
  -6 -32  -1   -3.70   10.10
   6  32   1   18.10   30.50
  -6  32  -1   16.80   16.90
  -6  32  -1   28.80   19.90
  -7 -32  -1    6.90    6.50
   7 -32   1   31.00   19.60
   7 -32   1  -10.00   13.10
  -7 -32  -1   24.40   10.90
  -7  32  -1   11.30   15.80
  -7  32  -1  -26.00   18.30
   7  32   1   40.70   34.90
   8 -32   1   22.20   19.40
   8 -32   1    8.60   17.80
  -8 -32  -1   14.00   11.30
  -8 -32  -1    1.60    7.20
  -8  32  -1   -0.70   12.60
  -8  32  -1  -50.69   14.60
   8  32   1   20.60   35.10
  -9 -32  -1   -2.30    9.20
   9 -32   1   -4.60   16.60
   9 -32   1   -3.60   16.70
  -9  32  -1    6.30   24.00
   9  32   1  -13.90   26.20
   9 -33  -1   -9.70   17.90
   9 -33  -1  -11.30   16.80
  -9 -33   1   13.00    7.80
   9  33  -1   -5.40   31.00
  -9  33   1    5.00   23.70
   8 -33  -1   12.20   18.60
  -8 -33   1    3.10    6.20
   8 -33  -1  -10.00   18.00
   8  33  -1  -15.40   32.30
  -8  33   1   21.50   16.70
   7 -33  -1   49.80   21.10
   7 -33  -1   42.90   23.70
  -7 -33   1   56.29   11.50
   7  33  -1   47.20   37.50
  -7  33   1   18.20   18.60
  -7  33   1   48.50   28.00
   6 -33  -1    5.00   16.90
  -6 -33   1   21.80    8.10
   6 -33  -1   11.00   16.20
  -6  33   1  -34.80   19.10
  -6  33   1   -1.20   15.30
   6  33  -1   13.30   27.20
  -5 -33   1   19.80    7.00
   5 -33  -1   46.90   20.10
  -5 -33   1   61.09   11.10
   5 -33  -1   11.70   16.20
   5  33  -1   38.50   35.10
  -5  33   1   64.19   27.90
  -5  33   1   47.40   20.50
  -4 -33   1   80.79   12.90
   4 -33  -1   40.50   16.50
  -4 -33   1   87.69   14.00
   4 -33  -1  117.89   28.60
  -4 -33   1   96.99   32.10
   4  33  -1   67.49   39.00
  -4  33   1   75.59   32.10
  -4  33   1   71.49   22.40
  -3 -33   1   13.00    9.40
  -3 -33   1    5.70   13.70
   3 -33  -1   17.30   12.70
   3 -33  -1   15.00   14.70
  -3 -33   1   23.40    8.10
   3  33  -1   -0.10   17.30
   3  33  -1   14.90   29.10
  -3  33   1  -13.70   16.90
  -3  33   1    5.50   13.60
   2 -33  -1   14.10   15.10
   2 -33  -1    1.20    9.40
  -2 -33   1   31.10    9.50
  -2 -33   1  -30.10   13.50
  -2 -33   1    5.00    8.70
  -2  33   1    3.80   10.30
   2  33  -1    5.20   18.70
  -2  33   1  -17.60   18.80
   2  33  -1   23.40   25.60
   1 -33  -1   25.90   12.80
  -1 -33   1   46.00   21.70
   1 -33  -1   51.39   14.70
  -1 -33   1   49.30   15.20
  -1 -33   1   69.89   14.70
  -1  33   1   52.69   12.80
   1  33  -1   67.19   37.80
  -1  33   1   67.29   27.80
   1  33  -1   79.29   30.90
   0 -33  -1   22.90   10.80
   0 -33  -1   49.50   15.90
   0 -33   1   40.20   15.50
   0 -33   1   36.60   11.40
   0  33  -1   31.90   24.20
   0  33   1   38.10   23.50
   1 -33   1   81.59   18.60
  -1 -33  -1  123.99   19.20
   1 -33   1   95.59   21.20
  -1 -33  -1  108.89   20.00
   1  33   1  132.39   45.10
  -1  33  -1  103.69   34.50
   1  33   1   55.99   28.10
   2 -33   1   22.40   11.90
  -2 -33  -1   24.60   12.10
   2 -33   1    0.60   11.40
  -2 -33  -1   16.80   14.90
  -2 -33  -1   27.50    9.50
  -2  33  -1   23.40   19.50
   2  33   1   77.49   27.60
  -2  33  -1   53.59   15.20
   2  33   1   15.90   25.60
  -3 -33  -1   78.99   16.10
   3 -33   1  108.29   23.50
   3 -33   1  122.59   26.60
  -3 -33  -1  110.19   33.60
  -3 -33  -1   85.09   16.00
  -3  33  -1  118.59   36.80
   3  33   1   81.89   31.00
  -3  33  -1   87.59   21.70
   3  33   1   83.09   40.70
  -4 -33  -1  180.18   23.10
  -4 -33  -1  184.98   39.30
   4 -33   1  265.27   39.20
   4 -33   1  202.38   32.20
  -4 -33  -1  197.18   22.00
   4  33   1  175.08   50.29
  -4  33  -1  200.18   32.10
  -4  33  -1  214.38   47.30
   5 -33   1   -3.70   11.30
  -5 -33  -1   -3.30    9.70
   5 -33   1    1.50   13.40
  -5 -33  -1    1.20    6.90
  -5  33  -1    7.50   14.80
  -5  33  -1  -40.60   20.00
   5  33   1  -16.20   26.60
  -6 -33  -1  175.18   23.90
   6 -33   1  160.58   31.50
  -6 -33  -1  135.99   17.10
   6 -33   1  129.49   33.30
   6  33   1   81.39   43.70
  -6  33  -1  143.19   30.40
  -6  33  -1  108.29   44.60
   7 -33   1    2.60   15.60
   7 -33   1   -6.20   14.00
  -7 -33  -1   10.80    8.90
  -7 -33  -1    8.30    7.80
  -7  33  -1  -35.70   31.20
  -7  33  -1   11.80   16.90
   7  33   1  -14.90   31.80
   8 -33   1   98.79   32.40
  -8 -33  -1   83.19   17.40
   8 -33   1   93.59   27.20
  -8 -33  -1   86.79   15.60
   8  33   1   75.29   47.70
  -8  33  -1   61.29   28.00
  -9 -33  -1   11.40   11.40
   9 -33   1    0.90   18.60
   9 -33   1    5.30   18.60
  -9  33  -1   -2.60   20.00
   9  33   1  -15.90   27.50
   8 -34  -1   83.39   32.30
  -8 -34   1   60.89   11.20
   8 -34  -1   15.50   20.40
  -8  34   1   36.00   24.30
   8  34  -1   37.20   36.10
   7 -34  -1   19.90   17.80
  -7 -34   1   48.50    9.80
   7 -34  -1   69.19   30.00
  -7  34   1   43.80   22.10
   7  34  -1   -3.00   33.60
  -6 -34   1   10.30    7.00
   6 -34  -1   -8.40   13.80
   6 -34  -1   -0.80   12.90
  -6  34   1    4.40   14.70
   6  34  -1   47.60   34.90
  -5 -34   1   25.60    8.10
  -5 -34   1   27.20    7.90
   5 -34  -1   12.70   15.00
   5 -34  -1    6.60   15.30
  -5  34   1   25.20   17.90
  -5  34   1   31.70   25.90
   5  34  -1   15.70   29.80
  -4 -34   1    7.90    8.60
  -4 -34   1    9.40   16.80
   4 -34  -1   -2.80   13.10
   4 -34  -1    5.80   12.70
  -4 -34   1   -4.70    6.50
   4  34  -1    8.30   25.30
  -4  34   1    1.90   13.50
  -4  34   1  -11.70   19.30
  -3 -34   1   45.90   25.10
   3 -34  -1  143.49   30.10
  -3 -34   1  126.99   17.90
   3 -34  -1  131.89   25.90
  -3 -34   1  113.79   16.80
  -3  34   1  125.99   37.70
   3  34  -1  114.99   36.70
   3  34  -1  126.09   42.80
  -3  34   1  121.99   24.50
  -2 -34   1   32.40   11.00
   2 -34  -1   23.20   12.30
   2 -34  -1   47.20   19.10
  -2 -34   1   14.60   16.30
  -2 -34   1   28.50   13.10
   2  34  -1   16.30   26.30
  -2  34   1   14.60   12.50
  -2  34   1   53.29   26.80
   2  34  -1   46.30   26.30
  -1 -34   1   54.39   24.80
  -1 -34   1  170.28   23.00
   1 -34  -1   88.09   20.60
  -1 -34   1   98.09   17.60
   1 -34  -1   86.99   19.80
  -1  34   1   69.69   27.70
   1  34  -1   62.09   36.50
   1  34  -1   69.69   28.90
   0 -34  -1   86.39   21.10
   0 -34   1   67.29   15.80
   0 -34  -1   58.19   14.80
   0 -34   1  103.59   22.10
   0 -34   1   75.49   30.30
   0  34   1   72.69   29.80
   0  34  -1   84.69   30.60
  -1 -34  -1    7.50   12.00
   1 -34   1  -12.70   10.00
   1 -34   1    3.80   11.70
  -1 -34  -1   12.30    7.90
  -1  34  -1   -2.20   22.50
   1  34   1   35.00   31.50
   1  34   1   37.40   26.30
  -2 -34  -1   69.89   17.30
   2 -34   1   76.59   23.10
  -2 -34  -1   63.89   24.40
  -2 -34  -1   89.99   16.00
   2 -34   1   62.39   18.60
  -2  34  -1   68.69   16.90
   2  34   1   71.59   29.20
  -2  34  -1   41.40   27.40
   2  34   1   72.39   36.30
  -3 -34  -1   58.19   14.00
   3 -34   1   55.99   18.20
  -3 -34  -1   21.90   11.60
   3 -34   1   61.89   22.00
  -3 -34  -1    2.60   16.60
  -3  34  -1   62.19   30.30
   3  34   1   52.89   32.70
  -3  34  -1   49.00   18.30
   3  34   1   42.10   26.50
  -4 -34  -1    3.00   10.20
   4 -34   1   22.00   16.00
   4 -34   1   10.60   14.10
  -4 -34  -1   41.90   11.20
  -4  34  -1   29.00   17.20
  -4  34  -1   51.09   28.00
   4  34   1   47.30   38.00
  -5 -34  -1  316.97   29.40
  -5 -34  -1  355.36   25.20
   5 -34   1  360.06   43.30
   5 -34   1  419.16   52.39
  -5  34  -1  352.26   46.00
   5  34   1  407.36   76.19
  -5  34  -1  487.15   69.39
   6 -34   1   54.79   25.30
   6 -34   1   49.70   20.40
  -6 -34  -1   40.00   13.50
  -6 -34  -1   29.50    7.60
   6  34   1   -4.50   28.40
  -6  34  -1   35.00   17.90
  -7 -34  -1  388.46   27.50
   7 -34   1  319.37   46.30
   7 -34   1  375.76   54.79
  -7 -34  -1  301.97   24.90
  -7  34  -1  260.87   47.10
   7  34   1  253.17   70.19
   8 -34   1   -8.60   16.60
   8 -34   1    7.00   18.80
  -8 -34  -1   14.20    9.20
  -8 -34  -1   -2.60    8.20
  -8  34  -1   26.50   20.90
   8  34   1    8.80   29.70
   7 -35  -1   21.70   18.50
  -7 -35   1   28.60    7.70
   7 -35  -1    7.20   20.60
   7  35  -1   32.90   32.60
  -7  35   1   61.09   29.20
  -6 -35   1   77.39   13.30
   6 -35  -1   81.09   25.90
   6 -35  -1   48.70   23.30
   6  35  -1   43.80   40.10
  -6  35   1   64.99   23.70
  -5 -35   1   60.69   11.50
  -5 -35   1   37.10   10.20
   5 -35  -1   45.50   20.90
   5 -35  -1   58.59   24.50
  -5  35   1   53.99   23.80
   5  35  -1   40.40   37.00
   4 -35  -1   65.19   20.60
  -4 -35   1  133.49   16.80
  -4 -35   1  128.09   17.90
   4 -35  -1  144.39   31.90
  -4 -35   1  130.99   36.70
  -4  35   1   60.49   21.20
  -4  35   1   67.39   33.50
   4  35  -1   98.99   43.70
  -3 -35   1  -25.00   17.40
  -3 -35   1   -1.60    9.30
   3 -35  -1   15.10   17.20
  -3 -35   1   -2.10    7.10
   3 -35  -1    9.60   12.30
  -3  35   1  -16.10   20.90
   3  35  -1   37.90   29.90
   3  35  -1    5.50   22.00
  -3  35   1    3.00   13.10
  -2 -35   1  256.77   27.80
   2 -35  -1  338.07   45.00
   2 -35  -1  258.97   33.80
  -2 -35   1  276.67   46.20
  -2 -35   1  314.67   27.40
  -2  35   1  309.07   55.09
   2  35  -1  255.07   59.39
  -2  35   1  266.57   27.20
   2  35  -1  251.17   50.19
   1 -35  -1   42.80   16.60
   1 -35  -1   56.89   17.90
  -1 -35   1   35.60   13.50
  -1 -35   1   20.10   23.70
  -1 -35   1   38.70   12.00
   1  35  -1   10.70   25.60
   1  35  -1   11.20   23.30
  -1  35   1   27.30   22.90
   0 -35  -1   72.89   20.70
   0 -35   1   79.99   37.10
   0 -35  -1   79.29   17.90
   0 -35   1   79.69   20.60
   0 -35   1   46.40   13.80
   0  35  -1  127.79   37.70
   0  35   1  100.99   33.80
   1 -35   1   25.30   14.20
  -1 -35  -1   76.99   17.50
  -1 -35  -1   42.40   12.80
   1 -35   1   52.39   17.60
  -1 -35  -1   64.89   29.20
   1  35   1   66.99   29.20
  -1  35  -1   34.60   24.70
   1  35   1   54.39   35.10
  -2 -35  -1   38.70   20.50
  -2 -35  -1    7.00    9.90
  -2 -35  -1   15.70    9.70
   2 -35   1   -7.10    9.30
   2 -35   1  -16.30   13.30
  -2  35  -1    0.90   21.20
   2  35   1   27.80   23.00
  -2  35  -1    9.40   10.80
   2  35   1    4.00   24.00
  -3 -35  -1    8.10   22.20
  -3 -35  -1   -0.30   10.10
  -3 -35  -1    4.10    8.20
   3 -35   1   14.00   14.70
   3 -35   1   -6.40   11.30
  -3  35  -1   -2.40   10.80
   3  35   1   46.40   32.50
   3  35   1   24.30   25.10
  -3  35  -1   -5.10   20.70
  -4 -35  -1   41.00   12.50
   4 -35   1   49.50   18.80
  -4 -35  -1   21.60   12.70
   4 -35   1   27.00   18.20
  -4  35  -1   26.20   18.30
  -4  35  -1   51.79   27.80
   4  35   1   29.30   31.50
   5 -35   1   12.10   13.20
  -5 -35  -1   11.30    8.70
   5 -35   1   47.30   21.30
  -5 -35  -1    6.90   10.90
   5  35   1   30.20   33.40
  -5  35  -1   18.50   17.90
  -6 -35  -1  235.88   27.00
  -6 -35  -1  192.98   18.60
   6 -35   1  218.98   36.80
   6 -35   1  182.48   39.80
   6  35   1  244.78   63.29
  -6  35  -1  189.68   36.90
  -7 -35  -1   21.40    8.20
   7 -35   1   17.50   19.90
  -7 -35  -1   23.30    9.00
   7 -35   1   -8.90   15.20
   7  35   1   17.80   30.70
  -7  35  -1    0.60   18.90
  -7  36   1   43.00   24.60
   7  36  -1   47.00   40.20
   6 -36  -1  148.09   31.40
   6 -36  -1  185.98   39.00
  -6  36   1   64.39   24.50
   6  36  -1  121.69   51.69
  -5 -36   1    5.10    7.70
   5 -36  -1   11.10   16.40
   5 -36  -1    4.10   16.70
  -5 -36   1    6.80    6.90
  -5  36   1   -4.50   14.30
   5  36  -1  -25.70   26.10
  -4 -36   1  108.99   17.30
   4 -36  -1  118.49   27.80
   4 -36  -1  137.79   33.70
  -4 -36   1  118.29   16.70
  -4  36   1  131.79   27.40
   4  36  -1   88.99   44.90
   3 -36  -1  154.58   32.50
  -3 -36   1  182.98   24.80
  -3 -36   1  172.28   42.00
  -3 -36   1  161.08   20.70
   3 -36  -1  156.38   29.30
   3  36  -1  132.99   38.70
  -3  36   1   96.39   23.10
   3  36  -1  185.98   50.49
  -3  36   1  216.08   49.40
   2 -36  -1   30.90   18.30
   2 -36  -1   13.00   11.20
  -2 -36   1   34.10   20.20
  -2 -36   1   19.10   12.40
   2  36  -1   31.20   31.20
  -2  36   1   41.40   26.60
   2  36  -1   51.09   30.70
  -2  36   1   17.30   12.20
   1 -36  -1  121.89   24.10
  -1 -36   1  103.59   37.40
  -1 -36   1  110.39   19.50
  -1 -36   1  117.79   24.10
   1 -36  -1  104.49   23.10
   1  36  -1  133.29   39.30
   1  36  -1   58.89   37.20
  -1  36   1  102.19   34.40
   0 -36  -1   -1.40    7.30
   0 -36  -1  -10.30   13.30
   0 -36   1  -43.40   17.90
   0 -36   1   -3.50   13.00
   0 -36   1    2.30    7.00
   0  36  -1   18.00   22.10
   0  36   1   19.90   26.80
   1 -36   1  -11.00   15.20
   1 -36   1   -2.40   10.20
  -1 -36  -1  -29.40   11.60
   1 -36   1   -3.30   12.60
  -1 -36  -1   -5.90    7.10
  -1 -36  -1   14.20   11.90
   1  36   1    5.70   20.20
   1  36   1   -0.90   22.80
  -1  36  -1    0.40   21.20
   2 -36   1   10.60   17.50
  -2 -36  -1   64.99   27.20
  -2 -36  -1   57.39   17.30
   2 -36   1   40.00   15.10
  -2 -36  -1   47.10   14.50
  -2  36  -1   71.79   35.60
  -2  36  -1   38.50   13.10
   2  36   1   15.70   29.50
   2  36   1   91.29   35.30
  -3 -36  -1   22.10   10.30
   3 -36   1   17.30   14.90
  -3 -36  -1   22.00   25.50
  -3 -36  -1    7.60   12.80
   3 -36   1    8.70   16.30
   3  36   1   12.80   28.40
  -3  36  -1   16.20   13.90
  -3  36  -1   19.80   26.50
   4 -36   1   40.50   22.10
  -4 -36  -1   16.80   10.80
  -4 -36  -1   14.50   11.80
   4 -36   1   25.10   15.20
  -4  36  -1   13.60   15.90
   4  36   1    9.30   30.70
  -5 -36  -1   35.40   12.20
   5 -36   1   22.40   18.60
   5 -36   1    2.30   12.90
  -5 -36  -1   15.00    8.70
  -5  36  -1   29.70   18.80
   5  36   1  -20.40   24.60
  -6 -36  -1   -3.00    7.60
  -6 -36  -1    5.10    8.70
   6 -36   1   10.80   19.90
   6 -36   1  -12.30   12.10
   6  36   1   17.80   32.60
  -6  36  -1   -1.60   16.60
  -7  36  -1   61.29   24.00
  -6  37   1    3.00   18.20
  -5 -37   1   32.60    9.60
   5 -37  -1   18.10   16.20
  -5 -37   1   46.00   11.40
   5 -37  -1   10.60   20.00
   5  37  -1   20.90   32.20
  -5  37   1   28.60   19.10
  -4 -37   1   61.59   12.30
   4 -37  -1   58.19   22.20
   4 -37  -1   22.60   19.10
  -4 -37   1   47.80   12.10
  -4  37   1   59.29   22.10
   4  37  -1   36.60   32.40
   3 -37  -1    6.90   15.90
  -3 -37   1   37.60   29.90
  -3 -37   1   22.10   10.80
  -3 -37   1   24.30   12.90
   3 -37  -1   -4.50   11.70
   3  37  -1   21.60   28.00
  -3  37   1   21.00   14.80
  -2 -37   1    4.50    9.80
  -2 -37   1   33.50   21.70
   2 -37  -1   62.59   19.40
  -2 -37   1    3.70   11.70
   2 -37  -1    2.20    9.70
   2  37  -1   22.80   26.70
  -2  37   1   15.70   11.30
  -2  37   1   20.50   29.80
   1 -37  -1   36.50   17.50
  -1 -37   1   33.90   11.10
   1 -37  -1   27.00   15.00
  -1 -37   1    1.90   23.20
  -1 -37   1   24.90   13.30
   1  37  -1   91.99   35.80
  -1  37   1   42.10   29.00
   0 -37  -1  -28.70   11.80
   0 -37   1  -10.40   19.00
   0 -37   1   13.60   10.00
   0 -37   1    6.60   14.10
   0 -37  -1    4.50    8.50
   0  37   1   33.20   25.30
   0  37  -1   -0.30   22.50
  -1 -37  -1   18.60   10.30
   1 -37   1   -2.00   11.10
   1 -37   1    1.30    9.20
  -1 -37  -1  -36.50   14.60
  -1 -37  -1  -31.30   10.80
   1 -37   1  -41.60   11.30
   1  37   1    9.80   21.00
  -1  37  -1   26.20   24.50
   2 -37   1   41.20   23.10
   2 -37   1   90.29   22.40
  -2 -37  -1   38.90   25.00
  -2 -37  -1   62.19   17.10
  -2 -37  -1  122.69   23.10
   2  37   1   58.29   30.70
   2  37   1   98.59   48.50
   3 -37   1   75.99   23.60
  -3 -37  -1   77.99   29.40
  -3 -37  -1   76.79   16.20
   3 -37   1   72.19   22.20
  -3 -37  -1  101.59   20.90
  -3  37  -1   61.19   18.60
   3  37   1   65.19   37.30
   4 -37   1   28.60   17.10
  -4 -37  -1   20.80   14.60
  -4 -37  -1   24.80   11.00
   4 -37   1   57.19   24.60
  -4  37  -1   32.20   17.20
   4  37   1   66.09   38.20
   5 -37   1   10.30   19.60
   5 -37   1   -4.90   13.20
  -5 -37  -1   -5.70    6.10
  -5 -37  -1    9.90   10.70
   5  37   1  -13.30   30.50
  -5  37  -1  -10.00   15.30
  -6  37  -1   -9.80   16.50
  -4 -38   1    5.70    9.10
  -4 -38   1    3.30    9.00
   4 -38  -1    9.60   18.50
   4 -38  -1    5.60   14.80
  -4  38   1    8.00   16.40
   3 -38  -1    8.40   14.60
  -3 -38   1   26.40   12.00
  -3 -38   1   57.29   31.60
  -3 -38   1   41.00   14.80
   3 -38  -1   21.80   18.10
  -3  38   1   23.70   14.10
   2 -38  -1  156.28   33.80
  -2 -38   1  145.29   24.20
   2 -38  -1  147.09   27.70
  -2 -38   1  200.88   28.00
  -2 -38   1  159.98   39.00
   2  38  -1  156.98   43.50
   1 -38  -1  227.78   33.90
  -1 -38   1  165.98   23.60
  -1 -38   1  184.98   29.60
  -1 -38   1   99.59   49.80
   1 -38  -1  141.39   27.40
   1  38  -1  182.88   47.20
   0 -38  -1   71.29   17.20
   0 -38   1  116.69   23.10
   0 -38   1   53.29   20.20
   0 -38  -1  100.69   24.70
   0  38   1  118.09   44.20
   0  38  -1   14.00   45.60
   1 -38   1   84.99   19.90
  -1 -38  -1   69.69   33.20
  -1 -38  -1   62.29   19.70
   1 -38   1   28.40   22.30
  -1 -38  -1  112.89   22.10
   1  38   1  115.49   38.30
  -2 -38  -1   14.70   12.70
   2 -38   1   18.70   13.20
  -2 -38  -1  -38.90   15.30
   2 -38   1    3.40   14.00
  -2 -38  -1   23.30   11.20
   2  38   1   12.00   33.90
   2  38   1    5.70   25.40
  -3 -38  -1   37.60   13.60
  -3 -38  -1   48.80   17.80
  -3 -38  -1   14.00   26.40
   3 -38   1   10.70   14.70
   3 -38   1   48.00   22.60
  -3  38  -1   43.80   16.20
   3  38   1   53.49   37.80
  -4 -38  -1   -1.60   10.20
  -4 -38  -1    4.60   10.00
   4 -38   1   -7.00   16.90
   4 -38   1    6.80   11.60
  -4  38  -1   -0.20   14.20
   4  38   1   18.10   30.80
  -3  39   1    9.50   13.40
  -2 -39   1  177.58   26.10
   2 -39  -1  161.58   28.30
  -2 -39   1  264.37   33.00
   2 -39  -1  210.38   37.60
   1 -39  -1  161.48   29.40
   1 -39  -1  204.48   33.50
  -1 -39   1  273.67   33.60
  -1 -39   1  200.58   26.90
   0 -39   1  185.68   30.20
   0 -39  -1  185.28   28.80
   0 -39   1  233.78   32.00
   0 -39  -1  220.18   33.50
   1 -39   1   90.79   24.20
   1 -39   1   86.09   21.70
  -1 -39  -1  122.39   23.10
  -1 -39  -1   88.29   22.90
  -2 -39  -1   97.29   20.40
  -2 -39  -1   72.79   18.40
   2 -39   1   61.29   20.10
   2 -39   1   33.40   19.20
   2  39   1   55.19   36.90
   2  39   1   98.29   59.99
  -3  39  -1    6.20   12.30
 -15   0   2  -22.60   14.80
 -14   0   2   22.80   20.00
 -13   0   2   -1.40   14.00
 -12   0   2  664.23   55.29
 -11   0   2    9.00   13.80
 -10   0   2 2160.48  104.39
  -9   0   2   -0.60    6.00
  -9   0   2   -1.60    9.00
  -8   0   2 1670.73   71.49
  -8   0   2 1687.73   80.79
  -7   0   2   -1.90    6.20
  -7   0   2    4.80    5.90
  -6   0   2  163.68   15.80
  -6   0   2  227.68   20.80
  -5   0   2   -5.60    5.20
  -5   0   2   -3.90    3.90
  -4   0   2    2.30    4.50
  -4   0   2    1.00    4.40
  -3   0   2    4.00    4.40
  -3   0   2   -1.80    3.20
  -1   0   2   -2.20    1.50
   0   0   2    0.10    0.80
  -1   0  -2   -1.90    0.70
   1   0   2    1.90    1.10
  -2   0  -2  128.09    7.20
  -3   0  -2    0.50    2.30
  -3   0  -2    8.00    4.10
  -4   0  -2  374.56   18.00
  -4   0  -2  404.16   24.30
  -5   0  -2    0.60    3.30
  -5   0  -2    1.60    5.00
  -6   0  -2  114.69   10.50
  -6   0  -2  114.39   16.80
  -7   0  -2    5.60    7.20
  -7   0  -2    9.20    8.70
  -7   0  -2    0.20    2.70
  -8   0  -2  246.48   16.60
  -8   0  -2  200.58   27.70
  -9   0  -2   -2.50    9.00
 -10   0  -2   62.29   19.00
 -11   0  -2   -0.80   12.80
 -12   0  -2   21.30   15.40
 -13   0  -2   10.00   16.40
 -14   0  -2    6.20   16.10
  15   0   2  -27.10   10.90
  16   0   2  -55.99   20.90
 -16  -1   2   -5.10   23.20
 -15  -1   2   18.10   22.20
 -14  -1   2   -4.10   17.20
 -14   1   2    8.30   20.00
 -13  -1   2   96.69   26.00
 -13   1   2  164.88   34.60
 -12  -1   2  225.98   39.20
 -12   1   2  238.68   39.10
 -11  -1   2  486.05   43.60
 -11   1   2  367.96   45.30
 -10  -1   2  267.27   35.10
 -10   1   2  279.47   37.30
  -9  -1   2  416.86   36.00
  -9   1   2  372.66   28.00
  -9   1   2  368.56   35.50
  -8  -1   2   37.30    8.90
  -8  -1   2   38.50   13.40
  -8   1   2   39.20   10.00
  -8   1   2   33.00   13.00
  -7  -1   2   17.20    9.50
  -7  -1   2   15.30    6.50
  -7   1   2   -4.20    7.20
  -7   1   2    2.70    8.40
  -7   1   2    6.70    6.10
  -6  -1   2  129.29   17.80
  -6  -1   2  190.68   15.70
  -6   1   2  168.28   20.60
  -6   1   2  166.18   16.20
  -5  -1   2    6.70    5.70
  -5  -1   2    6.70    3.90
  -5   1   2   -6.00    3.70
  -5   1   2    5.90    5.70
  -4  -1   2  201.88   16.30
  -4  -1   2  229.68   15.50
  -4   1   2  248.88   18.00
  -4   1   2  203.28   15.90
  -3  -1   2 1197.78   48.90
  -3   1   2 1235.58   50.29
  -3   1   2 1239.48   49.70
  -2  -1   2 1176.68   43.80
  -2  -1   2 1090.29   42.80
  -2   1   2 1127.79   44.50
  -1  -1   2 2207.78   77.39
  -1   1   2 2209.88   78.09
  -1   1  -2  241.88   11.80
   1   1   2  249.97   10.40
  -2  -1  -2   12.00    4.60
  -2   1  -2   15.50    3.60
  -3  -1  -2  735.13   33.50
  -3  -1  -2  735.93   26.00
  -3   1  -2  679.43   29.40
  -4  -1  -2  722.43   27.90
  -4  -1  -2  774.62   36.80
  -4   1  -2  745.13   37.30
  -4   1  -2  704.63   31.30
  -5  -1  -2 1236.88   56.19
  -5  -1  -2 1239.08   46.10
  -5   1  -2 1198.58   49.20
  -5   1  -2 1266.07   57.29
  -6  -1  -2 1427.86   54.99
  -6  -1  -2 1517.25   67.99
  -6   1  -2 1513.05   71.69
  -6   1  -2 1441.66   67.59
  -7  -1  -2  168.68   23.80
  -7  -1  -2  111.79    9.70
  -7   1  -2  110.89   11.50
  -7   1  -2  146.29   24.20
  -7   1  -2  160.28   22.70
  -8  -1  -2  266.17   31.60
  -8  -1  -2  212.28   18.90
  -8   1  -2  230.68   17.10
  -8   1  -2  183.28   26.40
  -9  -1  -2  120.19   23.40
  -9   1  -2  166.98   28.20
 -10  -1  -2   54.59   18.90
 -10   1  -2   55.09   18.00
 -11  -1  -2  124.99   25.90
 -11   1  -2   93.09   24.00
 -12  -1  -2   72.59   23.20
 -12   1  -2   44.10   18.50
 -13  -1  -2  181.38   36.80
 -13   1  -2  207.28   38.80
 -14  -1  -2   30.90   20.60
 -14   1  -2   61.69   25.20
 -15  -1  -2   87.09   30.50
  15   1   2  -27.60   15.00
  16  -1   2  -10.30   18.10
  16   1   2    3.50   17.20
 -16  -2   2   -7.80   18.90
  16   2  -2   -5.90   22.70
 -15  -2   2    8.30   19.50
 -14  -2   2    2.40   15.50
 -14   2   2  -12.20   14.40
 -13  -2   2  120.79   29.90
 -13   2   2  123.29   32.90
 -12  -2   2   14.30   15.40
 -12   2   2    6.90   14.90
 -11  -2   2  341.57   42.60
 -11   2   2  383.36   45.70
 -10  -2   2  162.78   28.00
 -10   2   2   90.39   23.10
  -9  -2   2  571.64   41.30
  -9   2   2  476.45   33.60
  -9   2   2  563.64   43.30
  -8  -2   2  782.62   47.00
  -8  -2   2  689.43   36.20
  -8   2   2  820.42   49.40
  -8   2   2  682.93   39.90
  -7  -2   2  925.21   43.40
  -7  -2   2 1002.80   52.09
  -7   2   2  900.61   47.20
  -7   2   2  994.50   53.69
  -7   2   2  968.50   55.69
  -6  -2   2  581.14   33.90
  -6  -2   2  566.34   29.40
  -6   2   2  544.15   37.80
  -6   2   2  543.55   31.80
  -6   2   2  529.55   34.90
  -5  -2   2  145.19   13.00
  -5  -2   2  146.99   17.00
  -5  -2   2  166.08   18.50
  -5   2   2  161.98   25.70
  -5   2   2  135.99   14.50
  -5   2   2  139.99   18.10
  -4  -2   2   94.19   12.10
  -4  -2   2  142.69   11.40
  -4   2   2  134.09   15.80
  -4   2   2  127.99   15.10
  -3  -2   2   76.79    9.20
  -3  -2   2   70.59    8.80
  -3   2   2   55.29    9.10
  -3   2   2   67.29   10.50
  -2  -2   2 1511.85   54.09
  -2  -2   2 1516.75   55.49
  -2   2   2 1448.26   57.19
  -1  -2   2   50.39    6.00
  -1   2   2   55.39    6.90
   0   2  -2  550.54   23.10
  -1   2  -2  801.12   32.30
   1   2   2  831.02   30.00
  -2  -2  -2 1860.91   66.49
  -2   2  -2 1752.42   65.79
  -3  -2  -2  744.93   33.60
  -3   2  -2  715.53   31.80
  -3   2  -2  765.22   35.50
  -4  -2  -2  767.92   37.90
  -4   2  -2  788.22   39.30
  -4   2  -2  762.72   34.50
  -4   2  -2  830.22   42.10
  -5  -2  -2 1725.23   71.39
  -5   2  -2 1652.23   75.49
  -5   2  -2 1741.63   72.89
  -5   2  -2 1589.64   65.29
  -6  -2  -2  684.73   28.20
  -6  -2  -2  722.33   40.80
   6  -2   2  698.53   43.80
  -6   2  -2  711.23   34.80
  -6   2  -2  741.03   45.30
  -6   2  -2  766.32   42.90
   7  -2   2 1058.29   57.09
  -7  -2  -2 1031.40   40.70
  -7  -2  -2 1030.30   55.19
  -7   2  -2 1020.60   47.10
  -7   2  -2 1066.79   56.99
  -7   2  -2 1125.79   60.79
  -8  -2  -2   67.29   16.40
  -8   2  -2   47.80   14.70
  -8   2  -2   52.89   21.60
  -8   2  -2   37.40    8.00
  -9  -2  -2  338.17   38.30
  -9   2  -2  327.97   37.50
 -10  -2  -2    5.30   10.00
 -10   2  -2    5.40   11.60
 -11  -2  -2  156.18   29.60
 -11   2  -2  111.69   26.40
 -12  -2  -2  155.88   31.40
 -12   2  -2  115.39   27.80
 -13  -2  -2    4.20   12.50
 -13   2  -2    5.00   15.30
  13   2   2   10.40   15.80
 -14  -2  -2  290.67   46.40
  14   2   2  320.37   58.19
 -15  -2  -2   30.10   21.20
  15   2   2   47.40   28.50
 -16  -2  -2  182.18   51.99
  16   2   2  262.37   53.09
 -16  -3   2   16.30   21.90
  16   3  -2    2.80   21.50
 -15  -3   2   -3.00   16.70
  15   3  -2    8.90   19.10
 -14  -3   2   -3.90   16.50
 -13  -3   2    0.70   15.60
 -13   3   2   12.30   17.30
 -12  -3   2  -12.40    9.80
 -12   3   2   -5.60   12.80
 -11  -3   2   15.00   12.00
 -11   3   2  -18.60    9.90
 -10  -3   2  572.34   44.90
 -10   3   2  552.44   46.70
  -9  -3   2  212.08   29.70
  -9   3   2  186.38   23.50
  -9   3   2  158.38   27.70
  -8  -3   2 1666.93   79.89
  -8  -3   2 1623.44   68.99
  -8   3   2 1751.62   76.79
  -8   3   2 1763.52   83.99
  -8   3   2 1802.42   89.59
  -7  -3   2  858.71   47.60
  -7  -3   2  879.41   41.00
   7  -3  -2  931.31   51.69
  -7   3   2 1021.50   56.69
  -7   3   2  868.81   51.19
  -7   3   2  821.22   45.50
   6  -3  -2 3286.97  129.99
  -6  -3   2 3479.35  120.99
  -6  -3   2 3228.68  126.09
  -6   3   2 3270.17  129.99
  -6   3   2 3225.88  133.49
  -6   3   2 3323.47  126.49
   5  -3  -2   85.39   17.70
  -5  -3   2  105.89   13.70
  -5  -3   2  101.09   14.30
  -5  -3   2  103.19   12.20
  -5   3   2  104.79   14.60
  -5   3   2  108.29   18.40
  -5   3   2   95.59   15.70
  -4  -3   2  125.29   14.10
  -4  -3   2  166.68   12.30
  -4  -3   2  131.69   12.40
  -4   3   2  126.29   15.80
  -4   3   2  142.19   18.10
  -4   3   2  119.29   15.40
  -3  -3   2  229.58   13.90
  -3  -3   2  217.38   14.00
  -3   3   2  215.48   16.60
  -3   3   2  214.38   16.00
  -2  -3   2   36.80    6.00
  -2  -3   2   44.80    5.30
  -2   3   2   49.60    8.20
  -1  -3   2  289.57   15.30
   1   3  -2  282.67   15.60
  -1   3   2  317.17   16.80
   0  -3   2   51.89    6.60
   0  -3   2   61.99    7.20
   0   3   2   51.29    6.90
   0   3  -2   59.89    7.20
   0   3  -2   49.00    6.80
  -1   3  -2    0.60    2.30
   1   3   2   -3.00    2.30
   1   3   2    2.90    2.20
  -2  -3  -2  691.13   28.40
   2   3   2  626.94   24.30
  -2   3  -2  684.43   29.90
   2   3   2  638.64   24.20
  -2   3  -2  705.73   32.80
   3  -3   2  318.87   21.50
  -3  -3  -2  309.37   18.30
  -3   3  -2  279.87   21.10
   3   3   2  304.47   21.60
  -3   3  -2  283.77   17.80
  -4  -3  -2   35.80    8.50
   4  -3   2   24.50    7.70
   4   3   2   29.30   10.10
  -4   3  -2   28.00    8.60
  -4   3  -2   35.40   10.70
  -4   3  -2   21.10    6.50
  -5  -3  -2    0.00    5.30
   5  -3   2   -2.50    6.10
  -5   3  -2   -0.60    7.20
  -5   3  -2   -2.50    4.20
  -5   3  -2   -2.00    4.90
   6  -3   2  375.56   29.20
  -6  -3  -2  367.36   26.80
  -6   3  -2  336.77   22.70
  -6   3  -2  318.87   29.60
  -6   3  -2  407.16   29.60
   7  -3   2   75.59   16.40
  -7  -3  -2  107.29   18.70
  -7   3  -2   95.19   13.80
  -7   3  -2  142.99   23.80
  -7   3  -2  104.49   18.30
  -8  -3  -2  135.49   21.40
  -8   3  -2  169.88   28.30
  -8   3  -2  165.88   15.60
  -8   3  -2  171.38   27.20
  -9  -3  -2    7.80    9.40
  -9   3  -2   -3.90    9.30
 -10  -3  -2  272.57   37.50
 -10   3  -2  264.97   38.00
 -11  -3  -2  329.37   42.10
 -11   3  -2  330.17   45.00
 -12  -3  -2  100.89   25.60
 -12   3  -2   59.89   22.80
  12   3   2   49.90   26.70
 -13  -3  -2   10.70   16.00
  13   3   2   31.90   21.30
 -13   3  -2   25.00   19.60
 -14  -3  -2  113.89   29.90
  14   3   2  116.69   31.60
 -15  -3  -2  127.09   34.60
  15   3   2   90.99   29.00
 -16  -3  -2   30.50   23.10
  16   3   2  104.39   37.00
 -16  -4   2   -9.70   21.60
  16   4  -2    7.70   23.80
 -15  -4   2   78.19   28.50
  15   4  -2  118.09   38.60
 -14  -4   2   25.50   22.30
  14   4  -2   55.29   27.50
 -13  -4   2   93.99   25.30
 -13   4   2   80.69   45.70
 -12  -4   2    3.30   13.90
 -12   4   2  -11.10   12.50
 -11  -4   2   29.10   14.60
 -11   4   2    7.80   14.20
 -10  -4   2   58.59   17.90
 -10   4   2   42.50   17.70
  -9  -4   2  598.84   42.00
  -9   4   2  493.45   35.70
  -9   4   2  586.14   44.70
  -8  -4   2   -3.40    5.90
  -8  -4   2    9.70    7.80
  -8   4   2   14.70    7.50
  -8   4   2   27.40   13.20
  -8   4   2   29.10   14.10
   7  -4  -2  597.54   39.90
  -7  -4   2  569.74   36.10
  -7  -4   2  580.74   30.30
  -7   4   2  600.74   40.40
  -7   4   2  550.74   36.20
  -7   4   2  563.04   41.50
  -6  -4   2  225.88   20.40
  -6  -4   2  235.38   17.40
   6  -4  -2  220.38   26.30
  -6   4   2  246.68   23.50
  -6   4   2  262.57   22.00
  -6   4   2  207.98   26.50
  -5  -4   2  475.75   27.60
   5  -4  -2  467.05   30.70
  -5  -4   2  484.95   27.50
  -5  -4   2  451.75   24.80
  -5   4   2  481.55   33.30
  -5   4   2  454.75   29.70
  -5   4   2  509.05   31.70
   4  -4  -2   47.10   10.60
  -4  -4   2   47.80    8.10
  -4  -4   2   45.50    7.90
  -4  -4   2   53.39    8.50
  -4   4   2   49.40   10.90
  -4   4   2   38.10   10.70
  -4   4   2   55.19   10.60
  -3  -4   2   61.69    7.80
   3  -4  -2   61.49    9.90
  -3  -4   2   70.09    8.90
  -3   4   2   91.79   12.80
  -3   4   2   94.69   14.00
   2  -4  -2   12.90    5.30
  -2  -4   2   19.70    5.00
  -2  -4   2   12.20    2.70
   2   4  -2   15.50    4.30
  -2   4   2   12.30    5.70
  -2   4   2   14.30    6.20
  -1  -4   2  566.84   26.90
  -1  -4   2  610.04   26.60
   1   4  -2  568.44   26.80
  -1   4   2  583.04   26.80
  -1   4   2  631.74   28.30
   1   4  -2  561.04   26.30
   0  -4   2  182.08   12.60
   0  -4   2  195.78   12.70
   0   4   2  193.08   11.60
   0   4  -2  177.28   12.50
   0   4  -2  183.38   10.10
   0   4   2  174.58   12.00
   0   4  -2  196.28   13.00
  -1  -4  -2  246.68   12.10
   1  -4   2  264.47   14.80
  -1   4  -2  257.07   14.90
  -1   4  -2  252.97   15.70
   1   4   2  216.68   13.00
   1   4   2  247.38   13.60
   2  -4   2  562.14   27.50
  -2  -4  -2  571.54   24.50
   2   4   2  547.35   22.20
  -2   4  -2  564.14   27.60
   2   4   2  543.65   26.00
   2   4   2  526.25   22.30
   2   4   2  618.24   31.60
  -2   4  -2  541.15   28.40
  -3  -4  -2   74.09    5.40
   3  -4   2   82.89   12.80
  -3  -4  -2   95.19   11.20
   3   4   2   97.49   15.90
  -3   4  -2   62.29   11.60
  -3   4  -2   49.99    9.50
   4  -4   2 1652.63   68.79
  -4  -4  -2 1548.25   63.99
   4   4   2 1654.03   72.69
  -4   4  -2 1567.94   70.19
  -4   4  -2 1555.64   64.49
  -4   4  -2 1588.74   67.49
   5  -4   2    6.70    7.30
  -5  -4  -2   -1.60    4.20
  -5   4  -2   -0.80    5.50
   5   4   2  -16.30    5.10
  -5   4  -2    5.30    4.00
  -5   4  -2    4.20    7.30
  -6  -4  -2 1810.62   77.69
   6  -4   2 1794.12   80.99
  -6   4  -2 1843.52   85.19
  -6   4  -2 1853.21   80.99
  -6   4  -2 1724.13   74.09
   7  -4   2    8.60    8.80
  -7  -4  -2   12.60    8.50
  -7   4  -2   40.90   13.90
  -7   4  -2   28.30   11.90
   7   4   2    8.90   10.30
  -7   4  -2   10.10    6.00
  -8  -4  -2  307.37   29.00
   8   4   2  323.77   35.40
  -8   4  -2  348.57   34.30
  -8   4  -2  309.57   31.20
  -8   4  -2  375.96   25.10
  -9  -4  -2   -5.90    7.80
  -9   4  -2    4.40    9.30
   9   4   2   -2.80   12.90
  -9   4  -2   -6.00    8.60
 -10  -4  -2  416.86   38.80
  10   4   2  456.55   57.49
 -10   4  -2  449.16   41.90
 -11  -4  -2   -3.00    9.70
 -11   4  -2    9.30   14.40
  11   4   2  -25.80   12.80
 -12  -4  -2  479.05   55.19
  12   4   2  582.24   74.69
 -12   4  -2  549.65   62.29
  13   4   2  219.48   48.30
 -14  -4  -2  245.58   41.70
  14   4   2  316.37   60.39
 -15  -4  -2  142.69   33.10
  15   4   2  102.49   38.10
 -16  -4  -2   75.19   29.60
  16   4   2  123.49   41.60
 -16  -5   2   15.70   24.40
  16   5  -2   -6.10   21.50
 -15  -5   2  186.28   42.10
  15   5  -2  101.89   39.30
 -14  -5   2  104.49   31.40
  14   5  -2  122.09   37.00
 -13  -5   2  121.99   30.20
  13   5  -2  144.69   40.80
 -12  -5   2   80.89   22.30
 -12   5   2   32.80   20.90
 -11  -5   2   13.20   11.80
 -11   5   2   -8.60   13.60
 -10  -5   2   -2.60    8.80
 -10   5   2    3.70   12.90
  -9  -5   2    3.60    8.00
  -9   5   2   15.70    6.50
  -9   5   2   -3.40    9.30
  -8  -5   2   14.80    6.20
  -8  -5   2   21.30   10.30
  -8   5   2    0.20    8.90
  -8   5   2   13.30   11.70
  -8   5   2    5.40    6.20
  -7  -5   2   24.00    6.70
   7  -5  -2   22.60   10.40
  -7  -5   2   33.40   10.50
  -7   5   2   19.50   12.10
  -7   5   2   -2.70    8.00
  -7   5   2   27.30   13.90
  -6  -5   2  368.06   21.40
  -6  -5   2  303.07   23.50
   6  -5  -2  311.57   27.30
  -6   5   2  356.86   26.80
  -6   5   2  311.17   27.40
  -6   5   2  363.66   31.00
  -5  -5   2  160.88   13.80
   5  -5  -2  146.39   19.90
  -5  -5   2  150.48   14.40
  -5  -5   2  155.78   14.70
  -5   5   2  174.38   18.10
  -5   5   2  182.48   22.50
  -5   5   2  173.88   23.90
   4  -5  -2   79.59   13.20
  -4  -5   2   95.49   11.40
  -4  -5   2  101.59   10.10
  -4  -5   2   97.19   11.20
  -4   5   2  122.09   16.80
  -4   5   2   93.69   15.50
  -4   5   2  122.59   16.20
   3  -5  -2  269.57   19.00
  -3  -5   2  246.68   13.60
  -3  -5   2  226.98   15.40
  -3   5   2  246.08   19.70
   3   5  -2  229.98   15.30
  -3   5   2  252.27   19.20
   3   5  -2  288.47   20.70
  -2  -5   2  689.13   32.20
  -2  -5   2  665.43   25.30
   2  -5  -2  757.22   33.60
   2   5  -2  727.23   27.80
   2   5  -2  738.53   33.40
  -2   5   2  722.53   34.60
  -2   5   2  788.22   36.10
  -1  -5   2   44.40    7.70
  -1  -5   2   54.59    8.00
   1  -5  -2   47.90    6.90
  -1   5   2   58.69    8.10
   1   5  -2   46.50    8.00
   1   5  -2   55.49    8.40
  -1   5   2   49.90    9.00
   0  -5   2   15.20    3.10
   0  -5  -2   14.20    3.40
   0  -5   2   24.80    5.80
   0   5  -2   29.20    4.50
   0   5   2   27.00    6.00
   0   5   2   21.40    4.80
   0   5  -2   25.30    6.00
   1  -5   2 1515.55   54.39
  -1  -5  -2 1407.76   51.09
   1   5   2 1457.55   53.29
  -1   5  -2 1335.87   56.69
  -1   5  -2 1400.26   54.89
  -2  -5  -2  468.65   20.50
   2  -5   2  490.05   25.00
  -2  -5  -2  485.55   21.20
   2   5   2  488.15   23.00
  -2   5  -2  436.76   25.00
   2   5   2  415.36   20.40
  -2   5  -2  460.55   25.50
   2   5   2  433.86   27.90
  -3  -5  -2 1727.13   59.49
  -3  -5  -2 1739.23   63.49
   3  -5   2 1701.13   68.39
   3   5   2 1614.04   71.79
   3   5   2 1656.43   58.89
  -3   5  -2 1582.54   66.59
  -3   5  -2 1723.23   70.19
   3   5   2 1509.15   59.49
  -4  -5  -2  250.67   12.00
   4  -5   2  269.57   21.40
  -4  -5  -2  238.98   17.60
   4   5   2  234.38   22.20
  -4   5  -2  211.78   18.10
  -4   5  -2  204.08   20.90
  -4   5  -2  262.37   20.60
  -5  -5  -2 1246.28   55.09
   5  -5   2 1214.28   59.09
  -5   5  -2 1182.08   61.09
  -5   5  -2 1209.38   55.09
  -5   5  -2 1292.37   59.29
   5   5   2 1232.28   63.89
   6  -5   2  222.98   26.00
  -6  -5  -2  264.27   22.20
  -6   5  -2  230.28   29.10
  -6   5  -2  284.37   30.80
   6   5   2  216.78   31.60
  -6   5  -2  236.08   20.40
  -7  -5  -2  698.33   41.00
   7  -5   2  643.04   43.50
  -7   5  -2  730.73   45.30
  -7   5  -2  628.94   37.60
   7   5   2  649.93   48.00
  -7   5  -2  725.23   47.70
  -8  -5  -2   14.70    9.90
   8  -5   2   16.90   10.90
  -8   5  -2   12.50   10.70
   8   5   2   22.90   13.30
  -8   5  -2   13.00    9.90
  -9  -5  -2    9.90   10.30
  -9   5  -2   -3.70   10.60
   9   5   2   22.60   14.10
  -9   5  -2    6.10    7.00
 -10  -5  -2   58.29   18.10
 -10   5  -2   54.19   18.90
  10   5   2   40.30   23.00
 -11  -5  -2   49.70   19.00
  11   5   2   76.69   24.20
 -11   5  -2   15.00   14.70
 -12  -5  -2  239.98   38.70
  12   5   2  200.98   43.10
 -13  -5  -2  253.17   38.80
  13   5   2  322.87   55.89
 -14  -5  -2   24.60   18.30
  14   5   2   51.79   34.60
 -15  -5  -2  360.36   55.29
  15   5   2  263.07   57.59
 -16  -5  -2   42.30   25.90
  16   5   2   49.10   38.60
 -16  -6   2   40.80   27.50
  16   6  -2   49.80   35.00
 -15  -6   2    9.50   18.20
  15   6  -2   20.10   25.80
 -14  -6   2  358.56   49.70
  14   6  -2  471.35   73.69
 -13  -6   2   36.00   18.10
  13   6  -2   67.69   27.60
 -12  -6   2  439.26   50.99
  12   6  -2  419.96   60.69
 -11  -6   2    7.70    9.70
  11   6  -2   12.10   14.90
 -11   6   2   25.70   16.10
 -10  -6   2   97.79   21.60
 -10   6   2  103.49   21.00
  10   6  -2   87.79   26.60
 -10   6   2  126.69   27.30
  -9  -6   2   31.70   12.90
  -9   6   2   27.00   15.50
  -9   6   2   10.50   10.90
  -8  -6   2  182.58   24.60
  -8  -6   2  153.58   14.60
   8  -6  -2  111.79   23.60
  -8   6   2  159.78   22.70
  -8   6   2  162.58   28.00
  -8   6   2  176.98   27.80
  -7  -6   2  301.47   24.80
  -7  -6   2  295.87   19.50
   7  -6  -2  298.77   28.50
  -7   6   2  318.27   26.90
  -7   6   2  315.37   29.10
  -7   6   2  288.37   29.30
   6  -6  -2  442.86   32.50
  -6  -6   2  433.26   24.80
  -6  -6   2  405.96   27.10
  -6  -6   2  425.76   27.00
  -6   6   2  458.55   33.10
   6   6  -2  425.36   35.10
  -6   6   2  400.96   34.30
  -6   6   2  395.56   30.20
  -5  -6   2 1977.70   74.39
   5  -6  -2 1927.21   82.69
  -5  -6   2 1858.51   74.99
  -5  -6   2 1946.51   74.39
   5   6  -2 1939.81   77.39
  -5   6   2 2001.70   83.39
  -5   6   2 1905.61   81.49
   5   6  -2 1736.73   84.79
  -5   6   2 1887.51   84.99
   4  -6  -2  132.39   17.00
  -4  -6   2  136.89   11.30
  -4  -6   2  157.98   11.40
  -4  -6   2  150.88   12.60
  -4   6   2  142.79   17.00
  -4   6   2  146.89   20.30
   4   6  -2  135.09   19.60
  -4   6   2  114.39   17.10
   4   6  -2  149.99   12.40
  -3  -6   2  874.91   38.30
   3  -6  -2  877.71   41.40
  -3  -6   2  818.12   34.10
  -3  -6   2  839.42   33.10
  -3   6   2  784.42   41.80
  -3   6   2  949.01   44.00
   3   6  -2  826.92   37.80
   3   6  -2  881.51   43.90
   3   6  -2  883.31   34.60
  -2  -6   2  228.08   15.90
   2  -6  -2  205.78   15.60
   2   6  -2  210.68   17.00
  -2   6   2  227.58   16.90
   2   6  -2  216.48   15.90
  -2   6   2  250.77   19.10
   1  -6  -2  827.52   34.30
  -1  -6   2  806.12   36.40
  -1  -6   2  762.62   36.80
  -1   6   2  817.02   38.00
  -1   6   2  832.52   35.50
   1   6  -2  795.72   36.80
   1   6  -2  742.43   36.00
   0  -6  -2  452.25   20.30
   0  -6   2  448.76   24.90
   0  -6   2  479.85   19.60
   0   6  -2  495.55   25.80
   0   6   2  455.85   21.70
   0   6   2  465.35   24.90
   0   6   2  445.46   32.70
   0   6  -2  451.45   19.80
  -1  -6  -2  388.06   16.90
   1  -6   2  368.16   19.40
   1   6   2  392.06   18.80
  -1   6  -2  371.16   22.70
  -1   6  -2  369.36   20.10
   1   6   2  419.36   28.00
  -2  -6  -2  173.28   11.90
  -2  -6  -2  185.88   11.10
   2  -6   2  199.78   14.80
   2   6   2  184.38   12.40
   2   6   2  172.38   12.10
   2   6   2  163.98   17.20
  -2   6  -2  183.18   15.60
  -2   6  -2  188.38   15.30
  -3  -6  -2  639.74   29.30
   3  -6   2  645.84   34.30
   3   6   2  657.03   31.10
   3   6   2  661.93   38.30
  -3   6  -2  686.23   36.30
  -3   6  -2  634.04   34.20
   3   6   2  620.24   27.40
   3   6   2  661.43   28.00
  -4  -6  -2    5.80    4.00
   4  -6   2    6.90    6.30
  -4  -6  -2    8.10    3.10
  -4   6  -2    1.40    5.80
  -4   6  -2   -4.80    5.10
   4   6   2    4.60    6.60
   4   6   2    5.00    2.70
   4   6   2    3.50    3.10
  -4   6  -2    8.70    6.10
  -5  -6  -2   20.00    7.70
   5  -6   2   14.10    7.50
  -5  -6  -2   23.10    4.00
  -5   6  -2   26.30   10.00
   5   6   2   23.70   10.20
  -5   6  -2    7.00    6.90
  -5   6  -2   46.10   11.70
  -6  -6  -2   99.79   16.60
   6  -6   2  101.59   18.80
  -6   6  -2   63.19   14.10
  -6   6  -2  105.09   19.00
  -6   6  -2  115.99   21.30
   6   6   2   59.39   16.90
   7  -6   2  458.15   36.30
  -7  -6  -2  470.45   32.80
  -7   6  -2  475.55   38.70
   7   6   2  479.15   41.00
  -7   6  -2  462.25   31.60
  -7   6  -2  500.35   37.20
  -8  -6  -2  142.99   21.80
   8  -6   2  167.08   26.90
  -8   6  -2  207.68   20.20
  -8   6  -2  236.18   33.80
  -8   6  -2  177.98   27.00
   8   6   2  194.98   33.70
  -9  -6  -2    2.20    8.70
   9   6   2  -11.50   10.70
  -9   6  -2   -5.30    6.00
  -9   6  -2   -8.70    9.10
 -10  -6  -2  124.29   25.20
 -10   6  -2  120.19   26.30
  10   6   2  143.19   33.40
 -11  -6  -2  302.17   39.30
  11   6   2  356.26   54.49
 -12  -6  -2  117.59   26.90
  12   6   2   24.20   20.50
 -13  -6  -2  527.65   49.50
  13   6   2  310.47   56.79
 -14  -6  -2   53.89   23.90
  14   6   2   64.79   29.50
 -15  -6  -2   10.90   19.60
  15   6   2   26.50   29.60
 -16  -6  -2  -10.60   16.80
  16   6   2   17.20   30.00
 -16  -7   2   12.20   19.80
  16   7  -2    5.50   30.00
 -15  -7   2  -10.70   16.90
  15   7  -2  -13.60   22.40
 -14  -7   2    6.70   15.80
  14   7  -2  -28.10   15.40
 -13  -7   2  165.08   33.50
  13   7  -2  220.88   48.60
 -12  -7   2   44.10   18.10
  12   7  -2   60.09   25.50
 -11  -7   2  241.78   33.90
  11   7  -2  278.97   46.80
 -10  -7   2   29.80   13.30
 -10   7   2   29.70   12.20
  10   7  -2   24.80   15.50
 -10   7   2   -6.60   11.00
  -9  -7   2   51.29   14.90
  -9   7   2   50.49   18.40
  -9   7   2   43.90   13.30
   9   7  -2   58.29   21.50
   8  -7  -2   60.49   17.90
  -8  -7   2   49.10   12.90
  -8   7   2   78.39   19.90
  -8   7   2   47.70   15.20
   8   7  -2   67.09   21.00
  -8   7   2   38.60   15.80
   7  -7  -2   92.49   19.70
  -7  -7   2  122.79   11.90
  -7  -7   2   78.39   14.70
   7   7  -2   90.39   21.20
   7   7  -2   59.79   14.40
  -7   7   2   57.49   15.50
  -7   7   2  125.09   20.00
  -7   7   2  118.59   24.20
  -6  -7   2  302.17   21.30
   6  -7  -2  328.17   28.60
  -6  -7   2  350.76   23.70
  -6  -7   2  337.57   23.10
   6   7  -2  337.97   24.20
  -6   7   2  325.97   30.50
  -6   7   2  336.37   27.80
   6   7  -2  313.87   30.30
  -6   7   2  300.67   27.40
   5  -7  -2  584.94   37.20
  -5  -7   2  516.45   29.20
  -5  -7   2  660.13   30.30
  -5  -7   2  582.84   30.10
   5   7  -2  526.15   38.20
  -5   7   2  637.44   37.50
  -5   7   2  577.54   37.70
   5   7  -2  570.24   31.00
  -5   7   2  529.15   37.60
  -4  -7   2 2240.28   75.69
  -4  -7   2 2036.00   76.49
   4  -7  -2 2070.19   86.09
  -4  -7   2 2012.30   76.19
  -4  -7   2 2005.30   79.69
   4   7  -2 2026.40   79.69
  -4   7   2 2102.59   87.99
   4   7  -2 2052.69   77.29
   4   7  -2 2009.90   89.29
  -4   7   2 2251.87   87.59
  -4   7   2 2106.79   88.39
   3  -7  -2   55.69   10.60
  -3  -7   2   17.10    3.70
  -3  -7   2   13.60    3.60
  -3  -7   2   30.90    7.60
   3   7  -2   17.10    6.40
   3   7  -2   35.30    9.90
   3   7  -2   24.50    7.10
   3   7  -2   41.50    5.70
  -3   7   2   13.90    8.00
  -2  -7   2  125.29   12.60
  -2  -7   2  117.29   12.40
   2  -7  -2  139.29   13.00
  -2   7   2  156.88   14.30
  -2   7   2  141.49   17.30
   2   7  -2  139.89   13.30
   2   7  -2  160.48   19.20
  -1  -7   2   17.10    5.70
  -1  -7   2   15.20    5.10
   1  -7  -2   12.70    4.40
   1   7  -2   22.20    6.60
  -1   7   2   20.70    9.20
  -1   7   2   16.70    6.30
  -1   7   2   18.60    5.70
   1   7  -2   13.80    5.30
   0  -7  -2  920.31   35.60
   0  -7   2  905.51   41.90
   0  -7   2  897.41   34.20
   0   7   2  856.61   49.20
   0   7   2  891.91   36.90
   0   7  -2  890.91   34.90
   0   7   2  938.81   41.80
   0   7  -2  901.01   42.10
   1  -7   2   45.90    7.10
  -1  -7  -2   33.50    4.80
  -1   7  -2   61.99   10.80
   1   7   2   34.30    6.00
   1   7   2   46.60   12.70
  -1   7  -2   41.40    7.30
  -2  -7  -2  251.07   13.40
   2  -7   2  247.88   17.50
  -2  -7  -2  251.87   15.80
  -2   7  -2  242.48   19.20
   2   7   2  259.37   15.00
  -2   7  -2  236.18   18.00
   2   7   2  232.68   15.90
   2   7   2  229.28   16.10
   2   7   2  273.77   23.50
  -3  -7  -2   88.79    9.90
   3  -7   2   67.79   11.60
  -3   7  -2   55.09   11.70
   3   7   2   93.99   17.30
  -3   7  -2   61.49   11.60
   3   7   2   67.89   10.40
   3   7   2   83.69   10.80
   3   7   2   74.29    9.10
   3   7   2   60.79    8.60
  -4  -7  -2   60.59    9.60
  -4  -7  -2   39.40    6.40
   4  -7   2   27.30    9.50
   4   7   2   39.60    6.30
  -4   7  -2   45.20   12.30
  -4   7  -2   36.10   10.90
   4   7   2   62.89   16.00
   4   7   2   48.70    7.50
   4   7   2   42.80   11.10
  -5  -7  -2   -3.20    2.70
   5  -7   2    2.90    7.40
  -5  -7  -2    3.60    5.10
  -5   7  -2    2.60    6.80
  -5   7  -2    0.60    6.30
  -5   7  -2  -15.80    4.70
   5   7   2    8.40    9.30
   6  -7   2    0.10    6.40
  -6  -7  -2   -2.40    5.20
  -6  -7  -2    2.20    2.10
  -6   7  -2   -1.60    7.10
  -6   7  -2    7.80    8.40
   6   7   2    0.40    7.60
  -6   7  -2  -13.90    4.20
   7  -7   2   -4.70    8.50
  -7  -7  -2    1.30    6.20
   7  -7   2    6.90    9.10
  -7   7  -2   -1.50    8.10
  -7   7  -2    3.40    7.70
  -7   7  -2   -6.10    5.60
   7   7   2   -2.90    8.00
   8  -7   2   30.10   15.50
  -8  -7  -2   20.70   10.20
  -8   7  -2   20.70   13.70
  -8   7  -2   29.00    9.60
  -8   7  -2   70.09   18.40
   8   7   2   30.50   16.10
  -9  -7  -2   87.79   19.20
  -9   7  -2   71.89   22.30
  -9   7  -2   74.09   17.20
   9   7   2  133.09   30.50
 -10  -7  -2  224.08   31.80
 -10   7  -2  243.18   35.90
  10   7   2  252.87   44.00
 -11  -7  -2   -0.50   10.10
  11   7   2    0.90   15.80
 -12  -7  -2  308.17   42.70
  12   7   2  310.07   54.59
 -13  -7  -2   19.50   16.50
  13   7   2    7.60   18.50
 -14  -7  -2   44.10   21.40
  14   7   2   56.69   29.10
 -15  -7  -2    2.80   16.80
  15   7   2   -9.80   20.20
 -16  -7  -2   -1.40   18.50
  16   7   2    9.30   24.80
 -16  -8   2  190.18   43.00
  16   8  -2   84.49   37.70
 -15  -8   2  -15.60   15.30
  15   8  -2   -6.60   24.20
 -14  -8   2   72.19   28.60
  14   8  -2   45.90   30.80
 -13  -8   2  226.38   36.60
  13   8  -2  234.98   49.70
 -12  -8   2   19.20   13.70
  12   8  -2   11.20   18.00
 -11  -8   2  118.09   24.00
  11   8  -2  175.78   39.00
 -10  -8   2   -1.00    7.70
  10   8  -2   15.30   15.60
 -10   8   2   35.40   13.30
  -9  -8   2   -7.50    6.80
  -9   8   2   -4.00   11.10
   9   8  -2   13.70   14.50
  -9   8   2  -11.00    5.60
  -9   8   2   -8.80   18.90
   8  -8  -2  367.86   35.20
   8  -8  -2  410.36   56.39
  -8  -8   2  398.76   30.70
  -8   8   2  416.76   38.20
  -8   8   2  427.96   37.40
   8   8  -2  409.96   40.10
  -8   8   2  398.86   33.60
   7  -8  -2   24.50    9.80
  -7  -8   2   -2.00    3.30
   7  -8  -2   -1.60    6.90
  -7  -8   2    1.30    6.30
   7   8  -2   -0.20    5.90
   7   8  -2   -0.30    9.50
  -7   8   2    7.70    9.10
  -7   8   2   -9.30    7.60
  -7   8   2   -4.80    8.30
   6  -8  -2 2006.60   88.79
  -6  -8   2 1944.01   76.99
  -6  -8   2 1948.71   77.79
  -6  -8   2 1895.11   78.39
   6   8  -2 1998.40   79.89
  -6   8   2 1893.41   90.39
  -6   8   2 1962.70   87.19
  -6   8   2 1899.01   87.19
   6   8  -2 1876.21   92.99
  -5  -8   2   29.60    7.40
  -5  -8   2   49.90    9.30
  -5  -8   2   35.10    7.60
  -5  -8   2   35.30    7.20
   5  -8  -2   26.20    9.80
   5   8  -2   35.70    8.00
  -5   8   2   44.30   12.80
   5   8  -2   54.69   15.90
  -5   8   2   22.20   10.10
  -5   8   2   21.80   11.30
  -4  -8   2 3591.74  120.49
  -4  -8   2 3332.77  121.49
  -4  -8   2 3457.75  121.89
  -4  -8   2 3462.35  127.79
   4  -8  -2 3590.44  134.19
   4   8  -2 3488.25  127.99
  -4   8   2 3446.56  135.49
   4   8  -2 3548.74  138.99
   4   8  -2 3427.66  122.59
  -4   8   2 3554.14  136.59
   4   8  -2 3509.25  130.49
   3  -8  -2 1100.39   50.09
  -3  -8   2 1043.90   47.40
  -3   8   2 1024.50   50.79
   3   8  -2 1091.39   49.20
   3   8  -2 1104.89   53.89
  -3   8   2 1114.19   53.29
   3   8  -2 1030.20   47.40
  -2  -8   2  956.50   46.30
  -2  -8   2 1054.29   46.40
   2  -8  -2 1026.10   45.20
  -2   8   2  975.80   48.60
   2   8  -2 1001.20   49.30
  -2   8   2 1039.10   46.80
   2   8  -2 1022.80   46.50
  -1  -8   2  783.92   39.00
  -1  -8   2  781.62   39.80
   1  -8  -2  833.32   36.00
  -1   8   2  865.61   47.10
  -1   8   2  832.72   41.20
  -1   8   2  824.72   37.20
   1   8  -2  862.01   40.40
   1   8  -2  807.42   39.80
   0  -8  -2   46.60    6.70
   0  -8   2   53.39    6.20
   0  -8   2   36.70    8.60
   0   8   2   49.40   10.20
   0   8   2   42.70    7.00
   0   8   2   65.29   15.60
   0   8  -2   63.49    7.20
   0   8  -2   58.99   11.50
   1   8   2  147.49   21.90
  -1   8  -2  169.28   16.30
  -1   8  -2  133.39   12.20
   2  -8   2  323.07   20.90
  -2  -8  -2  338.17   20.00
  -2  -8  -2  354.76   16.50
  -2  -8  -2  343.67   16.60
   2   8   2  349.27   17.70
  -2   8  -2  331.47   23.70
   2   8   2  345.37   18.00
   2   8   2  340.07   28.10
  -2   8  -2  300.07   21.20
   2   8   2  344.77   20.80
  -3  -8  -2   52.59    7.80
  -3  -8  -2   59.69    9.40
  -3  -8  -2  105.69   10.30
  -3   8  -2   69.59   12.90
  -3   8  -2  102.79   16.10
   3   8   2   49.60    8.80
   3   8   2   74.79   15.30
   3   8   2   65.99    9.50
   3   8   2   62.49    8.90
  -4  -8  -2 1097.29   47.20
   4  -8   2 1149.08   51.89
  -4  -8  -2 1105.79   45.90
   4  -8   2 1132.59   54.59
   4   8   2 1124.39   48.10
   4   8   2 1139.49   49.20
  -4   8  -2 1099.59   55.89
  -4   8  -2 1087.09   54.09
   4   8   2 1245.38   62.29
   4   8   2 1076.59   46.10
   4   8   2 1092.99   45.30
  -5  -8  -2  128.79   10.50
  -5  -8  -2  129.59   15.80
   5  -8   2  122.89   18.80
   5  -8   2  138.19   18.60
  -5   8  -2  146.29   20.10
  -5   8  -2   79.39   16.00
   5   8   2  152.48   15.10
   5   8   2  162.48   25.30
   5   8   2  121.89   12.00
   5   8   2  132.49   10.20
  -5   8  -2  185.98   25.50
   6  -8   2  227.48   26.90
  -6  -8  -2  234.18   13.10
   6  -8   2  232.48   22.00
  -6  -8  -2  188.68   18.90
  -6   8  -2  228.38   22.60
   6   8   2  262.47   18.10
  -6   8  -2  250.87   29.20
   6   8   2  242.08   33.90
  -6   8  -2  256.87   32.50
   6   8   2  245.38   21.70
  -7  -8  -2  593.14   36.80
   7  -8   2  524.55   39.90
   7  -8   2  523.95   36.00
   7   8   2  546.55   45.60
  -7   8  -2  571.44   37.20
  -7   8  -2  496.55   39.00
  -7   8  -2  512.35   41.90
  -8  -8  -2    4.00    7.30
   8  -8   2    0.00    9.00
   8  -8   2   -3.70    9.10
  -8   8  -2    7.00    6.40
  -8   8  -2   13.20   11.70
   8   8   2   -2.60    9.90
  -8   8  -2   23.40   12.50
  -9  -8  -2  212.58   29.10
  -9   8  -2  184.88   26.00
  -9   8  -2  122.49   27.00
   9   8   2  172.08   36.00
  -9   8  -2  141.09   26.80
 -10  -8  -2   34.70   15.00
  10   8   2   22.90   17.10
 -11  -8  -2   -7.50    8.60
  11   8   2    9.60   14.20
 -12  -8  -2   24.80   13.00
  12   8   2  -25.40   13.70
 -13  -8  -2   35.80   17.70
  13   8   2   -2.00   18.20
 -14  -8  -2   -9.60   14.30
  14   8   2  -15.20   15.40
 -15  -8  -2   14.40   17.10
  15   8   2   -1.00   18.00
 -16  -8  -2    6.50   19.50
  16   8   2   -5.00   23.30
 -16  -9   2   20.10   22.50
  16   9  -2   12.70   26.70
 -15  -9   2   51.29   25.20
  15   9  -2    9.40   25.80
 -14  -9   2    2.20   15.80
  14   9  -2    6.90   21.20
 -13  -9   2   22.30   17.00
  13   9  -2   -6.20   19.50
 -12  -9   2  248.48   37.00
  12   9  -2  180.68   42.80
 -11  -9   2  181.18   30.20
  11   9  -2  216.98   45.00
 -10  -9   2   23.40   12.00
  10   9  -2   12.60   15.80
 -10   9   2   22.80   15.70
  -9  -9   2  926.41   53.39
  -9   9   2  786.32   60.29
  -9   9   2 1078.89   71.39
   9   9  -2  928.51   68.29
  -9   9   2  917.81   55.89
   8  -9  -2   -2.20    9.00
   8  -9  -2   11.50   10.00
  -8  -9   2   -1.70    6.70
  -8   9   2   14.50   11.70
   8   9  -2  -10.20   10.70
  -8   9   2    7.50    9.80
  -8   9   2    4.60   11.50
   7  -9  -2 1279.27   64.19
  -7  -9   2 1271.77   59.59
  -7  -9   2 1363.86   57.29
   7  -9  -2 1327.47   69.69
   7   9  -2 1378.66   77.09
  -7   9   2 1278.67   72.19
   7   9  -2 1283.87   60.39
  -7   9   2 1205.78   66.89
  -7   9   2 1331.57   68.89
   6  -9  -2  212.08   24.80
  -6  -9   2  190.38   16.10
  -6  -9   2  174.18   16.90
  -6  -9   2  192.78   16.50
   6  -9  -2  181.08   25.80
  -6  -9   2  199.28   17.10
  -6   9   2  207.98   25.40
   6   9  -2  210.88   30.80
  -6   9   2  234.38   31.30
   6   9  -2  192.78   17.20
  -6   9   2  194.38   26.40
  -5  -9   2 1053.09   45.70
   5  -9  -2 1035.20   55.79
  -5  -9   2 1057.69   44.70
  -5  -9   2 1101.09   49.30
  -5  -9   2 1099.09   46.50
  -5   9   2 1070.89   58.19
   5   9  -2 1068.79   46.30
  -5   9   2 1079.49   57.69
   5   9  -2 1131.89   61.69
   5   9  -2 1120.29   49.70
   5   9  -2 1187.38   53.29
  -5   9   2 1042.50   54.49
  -4  -9   2  114.89   14.70
   4  -9  -2   76.89   12.30
   4  -9  -2  103.69   17.60
  -4  -9   2   92.09    8.20
  -4  -9   2  102.59    7.90
  -4  -9   2   94.59    8.50
   4   9  -2   93.99   13.60
   4   9  -2   92.29    8.60
  -4   9   2   94.59   17.30
   4   9  -2  124.49   21.80
  -4   9   2  108.49   18.50
   4   9  -2   96.89   14.80
  -3  -9   2   35.30    8.70
   3  -9  -2   90.49   13.80
   3   9  -2   42.90    9.10
   3   9  -2   43.10   11.30
  -2  -9   2  637.94   35.10
  -2  -9   2  643.34   34.50
   2  -9  -2  683.33   33.50
  -2   9   2  682.43   37.80
   2   9  -2  603.84   33.90
   2   9  -2  641.84   38.10
  -2   9   2  622.34   33.60
   1  -9  -2  375.36   21.00
  -1   9   2  352.16   29.50
   1   9  -2  418.36   25.90
  -1   9   2  343.37   24.90
  -1   9   2  337.07   21.20
   0  -9   2  473.15   28.30
   0  -9   2  452.75   19.80
   0  -9   2  419.66   19.60
   0  -9  -2  406.66   20.70
   0   9   2  447.46   22.30
   0   9  -2  429.56   20.30
   0   9   2  476.95   35.80
   0   9   2  454.05   27.70
   0   9  -2  425.86   27.50
  -1  -9  -2   53.89    8.30
  -1  -9  -2   45.10    5.90
   1  -9   2   62.69    8.70
  -1   9  -2   70.09   12.60
  -1   9  -2   61.69    9.30
   1   9   2   55.99    8.90
   1   9   2   36.40   12.90
   1   9   2   58.39    7.40
   1   9   2   38.40    9.20
  -2  -9  -2  558.34   23.90
   2  -9   2  589.14   28.20
   2  -9   2  549.85   29.90
  -2  -9  -2  585.94   29.60
  -2  -9  -2  556.74   24.20
   2   9   2  551.04   25.30
  -2   9  -2  585.84   34.40
  -2   9  -2  551.84   30.90
   2   9   2  580.64   25.70
   2   9   2  535.65   29.70
   2   9   2  638.94   40.80
  -3  -9  -2 2787.02   97.59
  -3  -9  -2 2792.92   98.19
  -3  -9  -2 2727.93  102.09
   3  -9   2 2879.11  103.49
   3  -9   2 2820.72  107.09
  -3   9  -2 2612.64  107.59
   3   9   2 2821.82  116.89
   3   9   2 2709.73  101.89
   3   9   2 2751.72   98.69
   3   9   2 2735.33   99.59
  -3   9  -2 2606.84  108.89
  -4  -9  -2   27.20    6.50
  -4  -9  -2    5.50    4.40
  -4  -9  -2   16.00    5.40
   4  -9   2   12.60    7.90
   4  -9   2   18.00    7.60
   4   9   2   11.30    8.90
   4   9   2    2.50    4.90
  -4   9  -2   33.50   12.00
  -4   9  -2  -12.70    7.00
   4   9   2   20.70    6.40
   4   9   2   12.80    5.20
   4   9   2   21.10    6.00
  -5  -9  -2  229.88   15.70
  -5  -9  -2  244.98   18.20
   5  -9   2  238.88   23.60
  -5   9  -2  259.97   30.90
   5   9   2  239.98   17.20
   5   9   2  249.97   19.70
   5   9   2  227.68   15.30
  -5   9  -2  237.58   27.30
   5   9   2  237.28   32.70
  -5   9  -2  235.88   23.20
   5   9   2  220.68   18.00
  -6  -9  -2  156.28   11.70
[truncated: 4,234,913 more chars]
